# Supplementary material for: Types of Subducted Material Controlling Tethyan Porphyry Copper Mineralization
Source: Research Square preprint supplement (doi:10.21203/rs.3.rs-6037618/v1), 2025-02-26
Supplement: Supplementary file 1 [file 12eb9b7a456f9714accf41dd.xlsx]

## Sheet: Sheet1
Supplementary Table 1 Detailed information about the Tethyan porphyry copper deposits
NameDeposit	Includes	Other Names	Country	Group	Longitude (°)	Latitude (°)	Age(Ma)	Method	Subduction/Collision	Type	Tonnage/Mt	Cu grade %	Mo grade %	Au grade/ppm	Cu/Mt	Au/t	Data source
Agarak		Agharak	Armenia	Afro-Arabian collision zone	46.1883	38.9219	44.2	Mo Re-Os	Collision	Porphyry Cu-Mo	45	0.5	0.029	0.025	0.225	1.125	Hovakimyan et al., 2019, Economic Geology, 114(7): 1301-1337
Ankavan			Armenia	Afro-Arabian collision zone	44.5167	40.6333	29.34	Mo Re-Os	Collision	Porphyry Cu-Mo-Au	115	0.57	0.054	1.42	0.6555	163.3	Zürcher et al., 2019, Ore Geology Reviews, 111: 102849
Aygedzor			Armenia	Afro-Arabian collision zone	46.2	38.99	42.62	Mo Re-Os	Collision	Porphyry Cu-Mo	51.6	0.172	0.042	0.05	0.088752	2.58	Hovakimyan et al., 2019, Economic Geology, 114(7): 1301-1337
Dastakert			Armenia	Afro-Arabian collision zone	46.0228	39.375	39.97	Mo Re-Os	Collision	Porphyry Cu-Mo	9.6	0.95	0.043		0.0912	0	Hovakimyan et al., 2019, Economic Geology, 114(7): 1301-1337
Diakhchay			Armenia	Afro-Arabian collision zone	46.07	38.997	43	Eocene-Oligocene	Collision	Porphyry Cu-Mo	14.4	0.44		0.015	0.06336	0.216	Hovakimyan et al., 2019, Economic Geology, 114(7): 1301-1337
Hankasar			Armenia	Afro-Arabian collision zone	46.07	39.24	43.14	Mo Re-Os	Collision	Porphyry Cu-Mo	10.4	0.45	0.038		0.0468	0	Hovakimyan et al., 2019, Economic Geology, 114(7): 1301-1337
Kadjaran		Kadzharan	Armenia	Afro-Arabian collision zone	46.1378	39.1439	27.2	Mo Re-Os	Collision	Porphyry Cu-Mo	2244	0.23	0.033	0.02	5.1612	44.88	Hovakimyan et al., 2019, Economic Geology, 114(7): 1301-1337
Lichk			Armenia	Afro-Arabian collision zone	46.16	39.05	21	sericite K-Ar	Collision	Porphyry Cu-Mo	34	0.63	0.033	0.05	0.2142	1.7	Hovakimyan et al., 2019, Economic Geology, 114(7): 1301-1337
Teghout			Armenia	Afro-Arabian collision zone	44.8567	41.1047	145.85	Mo Re-Os	Subduction	Porphyry Cu-Mo	460	0.34	0.01	0.01	1.564	4.6	Moritz et a., 2021, Society of Economic Geologists Special Publication, 24: 181-203
Djaygir			Azerbaijan	Afro-Arabian collision zone	45.895	40.72	135	Early Cretaceous	Subduction	Porphyry Cu	117	0.354			0.41418	0	Moritz et a., 2021, Society of Economic Geologists Special Publication, 24: 181-203
Garadag		Karadag	Azerbaijan	Afro-Arabian collision zone	45.85	40.6333	135	Early Cretaceous	Subduction	Porphyry Cu	41.5	0.43	0.002		0.17845	0	Moritz et a., 2021, Society of Economic Geologists Special Publication, 24: 181-203
Kharkhar			Azerbaijan	Afro-Arabian collision zone	45.85	40.7	133.3	Mo Re-Os	Subduction	Porphyry Cu	22.6	0.367	0.003	0.2	0.082942	4.52	Moritz et a., 2021, Society of Economic Geologists Special Publication, 24: 181-203
Misdag			Azerbaijan	Afro-Arabian collision zone	46.05	39.05	40	Eocene-Oligocene	Collision	Porphyry Cu	350	0.43			1.505	0	Hovakimyan et al., 2019, Economic Geology, 114(7): 1301-1337
Kal-e-kaf			Iran	Afro-Arabian collision zone	54.5444	33.5358	53	whole-rock K-Ar	Subduction	Porphyry Cu-Mo	245	0.26	0.026		0.637	0	Richards and Sholeh, 2016, Society of Economic Geologists Special Publication, 19: 193-212; Zürcher et al., 2019, Ore Geology Reviews, 111: 102849
Ali Abad			Iran	Afro-Arabian collision zone	53.8497	31.6592	16.5	sericite Ar-Ar	Collision	Porphyry Cu-Mo	40	0.73	0.0059		0.292	0	Aghazadeh et al., 2015, Ore Geology Reviews, 70: 385-406; Zhao et al., 2019, Earth Science, 44(6): 2187-2196 (in Chinese with English Abstract)
Bagh Khoshk			Iran	Afro-Arabian collision zone	55.99	29.8317	17.85	Mo Re-Os	Collision	Porphyry Cu-Mo	90	0.23	0.0011		0.207	0	Aghazadeh et al., 2015, Ore Geology Reviews, 70: 385-406; Zhao et al., 2019, Earth Science, 44(6): 2187-2196 (in Chinese with English Abstract)
Bondar-e-Hanza			Iran	Afro-Arabian collision zone	57.25	29.33	28.38	Mo Re-Os	Collision	Porphyry Cu-Mo	50	0.3	0.008		0.15	0	Aghazadeh et al., 2015, Ore Geology Reviews, 70: 385-406; Zhao et al., 2019, Earth Science, 44(6): 2187-2196 (in Chinese with English Abstract)
Chah Firouzeh			Iran	Afro-Arabian collision zone	55.0131	30.3928	16.19	Mo Re-Os	Collision	Porphyry Cu	379	0.35			1.3265	0	Aghazadeh et al., 2015, Ore Geology Reviews, 70: 385-406; Zhao et al., 2019, Earth Science, 44(6): 2187-2196 (in Chinese with English Abstract)
Dalli			Iran	Afro-Arabian collision zone	50.32	34.27	17	Ar-Ar	Collision	Porphyry Cu-Au	8	0.5		0.75	0.04	6	Zhao et al., 2019, Earth Science, 44(6): 2187-2196 (in Chinese with English Abstract)
Dar Alu		Darreh Alou	Iran	Afro-Arabian collision zone	57.1069	29.4153	12.96	Mo Re-Os	Collision	Porphyry Cu-Mo	175	0.39	0.0046		0.6825	0	Aghazadeh et al., 2015, Ore Geology Reviews, 70: 385-406; Zhao et al., 2019, Earth Science, 44(6): 2187-2196 (in Chinese with English Abstract)
Darreh Zar			Iran	Afro-Arabian collision zone	55.8994	29.88	15.66	Mo Re-Os	Collision	Porphyry Cu-Mo	475	0.36	0.005	0	1.71	0	Aghazadeh et al., 2015, Ore Geology Reviews, 70: 385-406; Zhao et al., 2019, Earth Science, 44(6): 2187-2196 (in Chinese with English Abstract)
Darreh Zerreshk			Iran	Afro-Arabian collision zone	53.8233	31.5764	16.1	Bi Ar-Ar	Collision	Porphyry Cu-Mo	210	0.37	0.0013	0	0.777	0	Aghazadeh et al., 2015, Ore Geology Reviews, 70: 385-406; Zürcher et al., 2019, Ore Geology Reviews, 111: 102849
Haft Cheshmeh			Iran	Afro-Arabian collision zone	46.6464	38.7617	27.6	Mo Re-Os	Collision	Porphyry Cu-Mo	184	0.26	0.03		0.4784	0	Aghazadeh et al., 2015, Ore Geology Reviews, 70: 385-406; Zhao et al., 2019, Earth Science, 44(6): 2187-2196 (in Chinese with English Abstract)
Iju			Iran	Afro-Arabian collision zone	54.9489	30.5369	9.8	Mo Re-Os	Collision	Porphyry Cu-Mo	74	0.31	0.002		0.2294	0	Aghazadeh et al., 2015, Ore Geology Reviews, 70: 385-406; Zhao et al., 2019, Earth Science, 44(6): 2187-2196 (in Chinese with English Abstract)
Kahang			Iran	Afro-Arabian collision zone	52.4808	32.9317	15.17	Mo Re-Os	Collision	Porphyry Cu-Mo	70	0.6	0.007		0.42	0	Aghazadeh et al., 2015, Ore Geology Reviews, 70: 385-406; Zhao et al., 2019, Earth Science, 44(6): 2187-2196 (in Chinese with English Abstract)
Kerver			Iran	Afro-Arabian collision zone	58.545	28.545	7.25	Mo Re-Os	Collision	Porphyry Cu-Mo	250	0.23	0.007		0.575	0	Aghazadeh et al., 2015, Ore Geology Reviews, 70: 385-406; Zhao et al., 2019, Earth Science, 44(6): 2187-2196 (in Chinese with English Abstract)
Masjed Daghi			Iran	Afro-Arabian collision zone	45.9414	38.8756	20.46	Mo Re-Os	Collision	Porphyry Cu-Mo-Au	340	0.27		0.32	0.918	108.8	Aghazadeh et al., 2015, Ore Geology Reviews, 70: 385-406; Zhao et al., 2019, Earth Science, 44(6): 2187-2196 (in Chinese with English Abstract)
Meiduk		Miduk	Iran	Afro-Arabian collision zone	55.1672	30.4206	12.1	Mo Re-Os	Collision	Porphyry Cu-Mo	500	0.83	0.007		4.15	0	Richards and Sholeh, 2016, Society of Economic Geologists Special Publication, 19: 193-212; Zürcher et al., 2019, Ore Geology Reviews, 111: 102849
Now Chun			Iran	Afro-Arabian collision zone	55.8561	29.9217	13.7	Mo Re-Os	Collision	Porphyry Cu-Mo	388	0.23	0.025		0.8924	0	Aghazadeh et al., 2015, Ore Geology Reviews, 70: 385-406; Zhao et al., 2019, Earth Science, 44(6): 2187-2196 (in Chinese with English Abstract)
Sar Cheshmeh			Iran	Afro-Arabian collision zone	55.8619	29.945	13.29	Mo Re-Os	Collision	Porphyry Cu-Mo	1200	0.6	0.02	0.27	7.2	324	Aghazadeh et al., 2015, Ore Geology Reviews, 70: 385-406; Zhao et al., 2019, Earth Science, 44(6): 2187-2196 (in Chinese with English Abstract)
Sar Kuh			Iran	Afro-Arabian collision zone	55.8144	29.9358	15.14	Mo Re-Os	Collision	Porphyry Cu-Mo	110	0.26	0.0041		0.286	0	Aghazadeh et al., 2015, Ore Geology Reviews, 70: 385-406; Zhao et al., 2019, Earth Science, 44(6): 2187-2196 (in Chinese with English Abstract)
Sungun		Songun	Iran	Afro-Arabian collision zone	46.3711	38.8075	20.69	Zr U-Pb	Collision	Porphyry Cu-Mo	850	0.62	0.01		5.27	0	Aghazadeh et al., 2015, Ore Geology Reviews, 70: 385-406
Dasht-e-Kain			Pakistan	Afro-Arabian collision zone	64.5042	29.5544	21		Subduction	Porphyry Cu-Mo	350	0.3	0.001		1.05	0	Singer et al., 2008, U.S. Geological Survey, Open-File Report 2008-1155
Reko Diq	Western Porphyries (H14/15), Tanjeel Project, H8, H13, H35		Pakistan	Afro-Arabian collision zone	62.0789	29.1228	11.7	Mo Re-Os	Subduction	Porphyry Cu-Au	2420	0.51		0.27	12.342	653.4	Razique et al., 2014, Economic Geology, 109: 2003-2021; Zürcher et al., 2019, Ore Geology Reviews, 111: 102849
Saindak	Saindak (S.), East, North, and South S.		Pakistan	Afro-Arabian collision zone	61.5847	29.2708	22.2	Zr U-Pb	Subduction	Porphyry Cu-Mo	440	0.41	0.002		1.804	0	Richards et al., 2012, Economic Geology, 107: 295-332
Derekoy			Turkey	Afro-Arabian collision zone	27.3167	41.9114	77	76.96±0.42	Subduction	Porphyry Cu-Mo	270	0.28	0.003		0.756	0	Kuscu et al., 2019, Ore Geology Reviews, 107: 119-154
Şükrüpaşa			Turkey	Afro-Arabian collision zone	27.3	41.55	77.64	Zr U-Pb	Subduction	Porphyry Cu-Mo-W	8	0.3			0.024	0	Kuscu et al., 2019, Ore Geology Reviews, 107: 119-154
İkiztepe			Turkey	Afro-Arabian collision zone	27.54	41.52	77	Late Cretaceous	Subduction	Porphyry Cu-Mo-W	13	0.29	0.04		0.0377	0	Kuscu et al., 2019, Ore Geology Reviews, 107: 119-154
Keban			Turkey	Afro-Arabian collision zone	38.4358	38.4659	74.1	Bi Ar-Ar	Subduction	Porphyry Mo-Cu	100		0.8			0	Kuscu et al., 2019, Ore Geology Reviews, 107: 119-154
Konak			Turkey	Afro-Arabian collision zone	38.64	40.38	80.79	Zr U-Pb	Subduction	Porphyry Cu-Mo	518.44	0.23		0.2	1.19241	103.688	Baker et al., 2019, Economic Geology, 114(7): 1237-1250; Kuscu et al., 2019, Ore Geology Reviews, 107: 119-154
Güzelyayla			Turkey	Afro-Arabian collision zone	39.6531	40.8567	81.4	Mo Re-Os	Subduction	Porphyry Cu-Mo	186	0.3	0.014		0.558	0	Delibas et al., 2019, Economic Geology, 114(7): 1285-1300; Kuscu et al., 2019, Ore Geology Reviews, 107: 119-154
Balcılı			Turkey	Afro-Arabian collision zone	41.2654	41	62.3	K-Ar	Subduction	Porphyry Cu-Mo	145	0.25			0.3625	0	Kuscu et al., 2019, Ore Geology Reviews, 107: 119-154
İspir-Ulutaş			Turkey	Afro-Arabian collision zone	40.8833	40.45	59		Subduction	Porphyry Cu-Mo	73.6	0.35	0.03		0.2576	0	Delibas et al., 2019, Economic Geology, 114(7): 1285-1300; Kuscu et al., 2019, Ore Geology Reviews, 107: 119-154
Hüyüklü		Tilavşun	Turkey	Afro-Arabian collision zone	36.5532	38.1013	77	Late Cretaceous	Subduction	Porphyry Cu-Au	750	0.2			1.5	0	Kuscu et al., 2019, Ore Geology Reviews, 107: 119-154
Bakircay			Turkey	Afro-Arabian collision zone	35.44	40.9261	37.9	Mo Re-Os	Collision	Porphyry Cu	200	0.2			0.4	0	Kuscu et al., 2019, Ore Geology Reviews, 107: 119-154
Gümüşhane			Turkey	Afro-Arabian collision zone	41.8528	41.175	52.5		Collision	Porphyry Cu	80	0.5			0.4	0	Kuscu et al., 2019, Ore Geology Reviews, 107: 119-154
Ardala			Turkey	Afro-Arabian collision zone	41.897	41	50.83	Zr U-Pb	Collision	Porphyry Cu-Mo-Au	26.2	0.04		1.14	0.01048	29.868	Baker et al., 2019, Economic Geology, 114(7): 1237-1250; Kuscu et al., 2019, Ore Geology Reviews, 107: 119-154
Muratdere			Turkey	Afro-Arabian collision zone	29.88	39.9	46.74		Collision	Porphyry Cu-Mo	51	0.36	0.0118		0.1836	0	Baker et al., 2019, Economic Geology, 114(7): 1237-1250; Kuscu et al., 2019, Ore Geology Reviews, 107: 119-154
Topukdere			Turkey	Afro-Arabian collision zone	29.27	39.53	48.76	Zr U-Pb	Collision	Porphyry Cu-Mo	120	0.17			0.204	0	Kuscu et al., 2019, Ore Geology Reviews, 107: 119-154
Cevizlidere		Kizilviran	Turkey	Afro-Arabian collision zone	39.6	39.2667	24.8	Mo Re-Os	Collision	Porphyry Cu-Au	445.8	0.38		0.11	1.69404	49.038	Kuscu et al., 2019, Ore Geology Reviews, 107: 119-154
Çöpler			Turkey	Afro-Arabian collision zone	38.32	39.24	44.6	Mo Re-Os	Collision	Porphyry Au-Cu	32			0.09		2.88	Kuscu et al., 2019, Ore Geology Reviews, 107: 119-154; Zürcher et al., 2019, Ore Geology Reviews, 111: 102849
Karakartal		Kabataş	Turkey	Afro-Arabian collision zone	38.32	39.2	48.5	Ar-Ar	Collision	Porphyry Cu-Au	17.8	0.22		0.32	0.03916	5.696	Kuscu et al., 2019, Ore Geology Reviews, 107: 119-154; Zürcher et al., 2019, Ore Geology Reviews, 111: 102849
Kisladag			Turkey	Afro-Arabian collision zone	29.08	38.38	14.5	Mo Re-Os	Collision	Porphyry Au	862			0.52		448.24	Baker et al., 2019, Economic Geology, 114(7): 1237-1250
Halilaga			Turkey	Afro-Arabian collision zone	26.48	39.54	39.6	Mo Re-Os	Collision	Porphyry Cu-Au	183	0.27		0.3	0.4941	54.9	Baker et al., 2019, Economic Geology, 114(7): 1237-1250; Kuscu et al., 2019, Ore Geology Reviews, 107: 119-154
Tepeköy		Gökçeada	Turkey	Afro-Arabian collision zone	25.48	40.09	38		Collision	Porphyry Cu-Au	750	0.6		0.35	4.5	262.5	Kuscu et al., 2019, Ore Geology Reviews, 107: 119-154
Tereoba		Tepeoba	Turkey	Afro-Arabian collision zone	27.15	39.6	24.56	Mo Re-Os	Collision	Porphyry Cu-Mo-Au	19.24	0.33	0.041	0.96	0.063492	18.4704	Singer et al., 2008, U.S. Geological Survey, Open-File Report 2008-1155
Assarel			Bulgaria	Carpathians and Balkans	23.9833	42.5833	91	Mo Re-Os	Subduction	Porphyry Cu-Au	354	0.44		0.2	1.5576	70.8	Baker et al., 2019, Economic Geology, 114(7): 1237-1250
Elatsite		Elacite	Bulgaria	Carpathians and Balkans	24.0333	42.75	92.7	Zr U-Pb	Subduction	Porphyry Cu-Au	350	0.39		0.26	1.365	91	Baker et al., 2019, Economic Geology, 114(7): 1237-1250
Medet			Bulgaria	Carpathians and Balkans	24.0853	42.72	91	Mo Re-Os	Subduction	Porphyry Cu-Mo-Au	244	0.37	0.01	0.1	0.9028	24.4	Baker et al., 2019, Economic Geology, 114(7): 1237-1250
Tsar Assen		Tsar Asen	Bulgaria	Carpathians and Balkans	24.3392	42.3553	90	Early Senonian	Subduction	Porphyry Cu-Mo	6.6	0.47			0.03102	0	Singer et al., 2008, U.S. Geological Survey, Open-File Report 2008-1155
Vlaykov Vruh			Bulgaria	Carpathians and Balkans	24.2281	42.3481	86		Subduction	Porphyry Cu-Mo	9.8	0.46			0.04508	0	Singer et al., 2008, U.S. Geological Survey, Open-File Report 2008-1155
Skouries/Fisoka			Greece	Carpathians and Balkans	23.7036	40.4722	19.9	Bi Ar-Ar	Collision	Porphyry Au-Cu	289	0.43		0.58	1.2427	167.62	Baker et al., 2019, Economic Geology, 114(7): 1237-1250
Recsk			Hungary	Carpathians and Balkans	20.1	47.9333	35.5		Collision	Porphyry Cu-Mo-Au	700	0.66	0.005	0.28	4.62	196	Singer et al., 2008, U.S. Geological Survey, Open-File Report 2008-1155
Buchim			Macedonia	Carpathians and Balkans	22.6019	41.5106	23	(K-Ar	Collision	Porphyry Cu-Au	150	0.3		0.35	0.45	52.5	Singer et al., 2008, U.S. Geological Survey, Open-File Report 2008-1155
Bucim			Macedonia	Carpathians and Balkans	22.37	41.63	24.4	Zr U-Pb	Collision	Porphyry Cu-Au	85	0.3		0.3	0.255	25.5	Baker et al., 2019, Economic Geology, 114(7): 1237-1250
Ilovitza			Macedonia	Carpathians and Balkans	22.8167	41.3667	23	Tertiary	Collision	Porphyry Cu-Au	477	0.2		0.32	0.954	152.64	Baker et al., 2019, Economic Geology, 114(7): 1237-1250
Bolcana		Bolcana Troita	Romania	Carpathians and Balkans	23.0333	45.9833	10	Mo Re-Os	Collision	Porphyry Cu-Au	381	0.18		0.53	0.6858	201.93	Baker et al., 2019, Economic Geology, 114(7): 1237-1250
Bucium Tarnita			Romania	Carpathians and Balkans	23.2	46.2333	14.9	Miocene	Collision	Porphyry Cu-Au	335	0.5		0.36	1.675	120.6	Singer et al., 2008, U.S. Geological Survey, Open-File Report 2008-1155
Moldova Noua		Banat	Romania	Carpathians and Balkans	21.7025	44.7378	65	Laramian	Subduction	Porphyry Cu	500	0.35			1.75	0	Singer et al., 2008, U.S. Geological Survey, Open-File Report 2008-1155
Musariu			Romania	Carpathians and Balkans	22.8	46.15	13.3	Neogene	Collision	Porphyry Cu-Au	12	0.2		0.3	0.024	3.6	Singer et al., 2008, U.S. Geological Survey, Open-File Report 2008-1155
Rosia Poieni			Romania	Carpathians and Balkans	23.1667	46.3333	9.2	Ar-Ar	Collision	Porphyry Cu-Au	431	0.55		0.25	2.3705	107.75	Singer et al., 2008, U.S. Geological Survey, Open-File Report 2008-1155
Rovina	Colnic		Romania	Carpathians and Balkans	22.9	46.1667	14.9	Miocene	Collision	Porphyry Cu-Au	433	0.16		0.54	0.6928	233.82	Baker et al., 2019, Economic Geology, 114(7): 1237-1250
Talagiu			Romania	Carpathians and Balkans	22.15	46.2667	8.2	Late Miocene	Collision	Porphyry Cu-Au	150	0.35		0.6	0.525	90	Singer et al., 2008, U.S. Geological Survey, Open-File Report 2008-1155
Valea Morii			Romania	Carpathians and Balkans	22.85	46.15	11.4	Ar-Ar	Collision	Porphyry Cu-Au	100	0.25		0.31	0.25	31	Singer et al., 2008, U.S. Geological Survey, Open-File Report 2008-1155
Bor			Serbia	Carpathians and Balkans	22.0942	44.095	86	Mo Re-Os	Subduction	Porphyry Cu-Au	556	0.57		0.39	3.1692	216.84	Baker et al., 2019, Economic Geology, 114(7): 1237-1250
Cukaru Peki			Serbia	Carpathians and Balkans	22.15	44	88	Mo Re-Os	Subduction	Porphyry Cu-Au	36.7	3.3		2.1	1.2111	77.07	Baker et al., 2019, Economic Geology, 114(7): 1237-1250
Majdanpek			Serbia	Carpathians and Balkans	21.95	44.3833	83	Mo Re-Os	Subduction	Porphyry Cu-Mo-Au	1000	0.6	0.005	0.35	6	350	Baker et al., 2019, Economic Geology, 114(7): 1237-1250
Tulare			Serbia	Carpathians and Balkans	21.49	42.76	83		Subduction	Porphyry Cu-Au	547	0.23		0.22	1.2581	120.34	Baker et al., 2019, Economic Geology, 114(7): 1237-1250
Valja Strz			Serbia	Carpathians and Balkans	21.56	44.105	82.5	Zr U-Pb	Subduction	Porphyry Cu-Au	115	0.26		0.19	0.299	21.85	Knaak et al., 2016, Society of Economic Geologists Special Publication, 19: 1-28
Veliki Krivelj			Serbia	Carpathians and Balkans	22.0969	44.1311	87.88	Mo Re-Os	Subduction	Porphyry Cu-Mo-Au	750	0.44	0.004	0.068	3.3	51	Jelenković et al., 2016, Geologia Croatica, 69(1): 143-155
Biely Vrch			Slovakia	Carpathians and Balkans	19.35	49.75	13		Collision	Porphyry Au	41.7			0.78	0	32.526	Baker et al., 2019, Economic Geology, 114(7): 1237-1250
Zlatno		Pukanec	Slovakia	Carpathians and Balkans	18.8619	48.4375	14.5		Collision	Porphyry Cu	66	0.34			0.2244	0	Singer et al., 2008, U.S. Geological Survey, Open-File Report 2008-1155
Naruo			China	Pamir–Himalayas–Indochina	83.5258	32.8769	118.8	Mo Re-Os	Collision	Porphyry Cu-Au	578	0.41		0.18	2.3698	104.04	Yang and Cooke, 2019, Society of Economic Geologists Special Publications, 22: 133-187
Bolong			China	Pamir–Himalayas–Indochina	83.4028	32.8086	119	Mo Re-Os	Collision	Porphyry Cu-Au	400	0.52		0.25	2.08	100	Yang and Cooke, 2019, Society of Economic Geologists Special Publications, 22: 133-187
Duobuza			China	Pamir–Himalayas–Indochina	83.45	32.8333	118	Mo Re-Os	Collision	Porphyry Cu-Au	628	0.43		0.13	2.7004	81.64	Yang and Cooke, 2019, Society of Economic Geologists Special Publications, 22: 133-187
Qingcaoshan			China	Pamir–Himalayas–Indochina	82.9	33.23	115.8	Zr U-Pb	Collision	Porphyry Cu-Au	143	0.23		0.25	0.3289	35.75	Yang and Cooke, 2019, Society of Economic Geologists Special Publications, 22: 133-187
Xiongcun		Xietongmen	China	Pamir–Himalayas–Indochina	88.5667	29.5167	173.2	Mo Re-Os	Subduction	Porphyry Cu-Au	874	0.34		0.25	2.9716	218.5	Yang and Cooke, 2019, Society of Economic Geologists Special Publications, 22: 133-187
Sharang			China	Pamir–Himalayas–Indochina	92.6833	30.1819	52.3	Mo Re-Os	Collision	Porphyry Mo	100		0.061			0	Yang and Cooke, 2019, Society of Economic Geologists Special Publications, 22: 133-187
Chengba		Mingze	China	Pamir–Himalayas–Indochina	91.875	29.2508	30.2	Mo Re-Os	Collision	Porphyry Cu-Mo			0.1022			0	Yang and Cooke, 2019, Society of Economic Geologists Special Publications, 22: 133-187
Nanmu			China	Pamir–Himalayas–Indochina	90.8167	29.4667	14.5	Mo Re-Os	Collision	Porphyry Cu-Mo	250	0.2			0.5	0	Yang and Cao, 2024, Earth-Science Reviews, 258: 104954; Yang and Cooke, 2019, Society of Economic Geologists Special Publications, 22: 133-187
Qulong			China	Pamir–Himalayas–Indochina	91.5833	29.6	16	Mo Re-Os	Collision	Porphyry Cu-Mo	2200	0.52	0.032		11.44	0	Yang and Cao, 2024, Earth-Science Reviews, 258: 104954; Yang and Cooke, 2019, Society of Economic Geologists Special Publications, 22: 133-187
Tinggong		Tingguan	China	Pamir–Himalayas–Indochina	90.05	29.55	15.5	Mo Re-Os	Collision	Porphyry Cu-Mo	412	0.36			1.4832	0	Yang and Cao, 2024, Earth-Science Reviews, 258: 104954; Yang and Cooke, 2019, Society of Economic Geologists Special Publications, 22: 133-187
Chonjiang	Bairong, Ruigangmen, Xiaqing, Dubuqu	Nimu Project; Neymo Area	China	Pamir–Himalayas–Indochina	90	29.5833	13.99	Mo Re-Os	Collision	Porphyry Cu-Mo	74.6	0.67		0.12	0.49982	8.952	Yang and Cao, 2024, Earth-Science Reviews, 258: 104954; Yang and Cooke, 2019, Society of Economic Geologists Special Publications, 22: 133-187
Jiama			China	Pamir–Himalayas–Indochina	91.7517	29.6917	14.7	Mo Re-Os	Collision	Porphyry Cu-Mo	1055	0.44			4.642	0	Yang and Cao, 2024, Earth-Science Reviews, 258: 104954; Yang and Cooke, 2019, Society of Economic Geologists Special Publications, 22: 133-187
Jiru			China	Pamir–Himalayas–Indochina	88.9333	29.6833	15.2	Mo Re-Os	Collision	Porphyry Cu-Mo	42	0.43			0.1806	0	Yang and Cao, 2024, Earth-Science Reviews, 258: 104954; Yang and Cooke, 2019, Society of Economic Geologists Special Publications, 22: 133-187
Lakang’e		Lakange	China	Pamir–Himalayas–Indochina	91.4833	29.5833	13.1	Mo Re-Os	Collision	Porphyry Cu-Mo	18.9	0.19			0.03591	0	Yang and Cao, 2024, Earth-Science Reviews, 258: 104954; Yang and Cooke, 2019, Society of Economic Geologists Special Publications, 22: 133-187
Zhunuo			China	Pamir–Himalayas–Indochina	87.5333	29.4333	14	Mo Re-Os	Collision	Porphyry Cu-Mo	403	0.57		0.3	2.2971	120.9	Yang and Cao, 2024, Earth-Science Reviews, 258: 104954; Yang and Cooke, 2019, Society of Economic Geologists Special Publications, 22: 133-187
Gangjiang			China	Pamir–Himalayas–Indochina	89.9413	29.5911	12.8	Mo Re-Os	Collision	Porphyry Cu-Mo	356	0.28			0.9968	0	Yang and Cao, 2024, Earth-Science Reviews, 258: 104954; Yang and Cooke, 2019, Society of Economic Geologists Special Publications, 22: 133-187
Bairong			China	Pamir–Himalayas–Indochina	89.9265	29.6139	12.8	Mo Re-Os	Collision	Porphyry Cu-Mo	35	0.49			0.1715	0	Yang and Cao, 2024, Earth-Science Reviews, 258: 104954; Yang and Cooke, 2019, Society of Economic Geologists Special Publications, 22: 133-187
Bangpu			China	Pamir–Himalayas–Indochina	91.8833	29.9	15	Mo Re-Os	Collision	Porphyry Cu-Mo	62.5	0.32			0.2	0	Yang and Cao, 2024, Earth-Science Reviews, 258: 104954; Yang and Cooke, 2019, Society of Economic Geologists Special Publications, 22: 133-187
Tangbula			China	Pamir–Himalayas–Indochina	93.0667	29.9167	21	Mo Re-Os	Collision	Porphyry Cu-Mo	221	0.005			0.01105	0	Yang and Cao, 2024, Earth-Science Reviews, 258: 104954; Yang and Cooke, 2019, Society of Economic Geologists Special Publications, 22: 133-187
Duoxiasongduo			China	Pamir–Himalayas–Indochina	97.8667	31.0833	37.5	Zr U-Pb	Collision	Porphyry Cu-Mo	236	0.38	0.04	0.06	0.8968	14.16	Yang and Cao, 2024, Earth-Science Reviews, 258: 104954; Yang and Cooke, 2019, Society of Economic Geologists Special Publications, 22: 133-187
Malasongduo			China	Pamir–Himalayas–Indochina	97.95	31	35.8	Mo Re-Os	Collision	Porphyry Cu-Mo	228	0.45	0.014	0.06	1.026	13.68	Yang and Cao, 2024, Earth-Science Reviews, 258: 104954; Yang and Cooke, 2019, Society of Economic Geologists Special Publications, 22: 133-187
Mangzhong		Mangzong	China	Pamir–Himalayas–Indochina	97.8	31.2	37.6	Mo Re-Os	Collision	Porphyry Cu-Mo	73.5	0.34	0.03	0.02	0.2499	1.47	Yang and Cao, 2024, Earth-Science Reviews, 258: 104954; Yang and Cooke, 2019, Society of Economic Geologists Special Publications, 22: 133-187
Yulong			China	Pamir–Himalayas–Indochina	97.7333	31.4	40.1	Mo Re-Os	Collision	Porphyry Cu-Mo	1006	0.62	0.022	0.05	6.2372	50.3	Yang and Cao, 2024, Earth-Science Reviews, 258: 104954; Yang and Cooke, 2019, Society of Economic Geologists Special Publications, 22: 133-187
Zhanaga		Zhalaga, Zanaga	China	Pamir–Himalayas–Indochina	97.7333	31.25	38.5	Zr U-Pb	Collision	Porphyry Cu-Mo	83.3	0.36	0.03	0.03	0.29988	2.499	Yang and Cao, 2024, Earth-Science Reviews, 258: 104954; Yang and Cooke, 2019, Society of Economic Geologists Special Publications, 22: 133-187
Bada			China	Pamir–Himalayas–Indochina	98.4568	29.6994	35	Zr U-Pb	Collision	Porphyry Cu-Au	41	0.69		1.35	0.2829	55.35	Yang and Cao, 2024, Earth-Science Reviews, 258: 104954; Yang and Cooke, 2019, Society of Economic Geologists Special Publications, 22: 133-187
Narigongma			China	Pamir–Himalayas–Indochina	94.7856	33.5308	41	Mo Re-Os	Collision	Porphyry Cu-Mo	145	0.32			0.464	0	Yang and Cao, 2024, Earth-Science Reviews, 258: 104954; Yang and Cooke, 2019, Society of Economic Geologists Special Publications, 22: 133-187
Baomai		Xiariduo	China	Pamir–Himalayas–Indochina	97.4167	31.75	43	Mo Re-Os	Collision	Porphyry Cu-Mo	95.4545	0.22			0.21	0	Yang and Cao, 2024, Earth-Science Reviews, 258: 104954; Yang and Cooke, 2019, Society of Economic Geologists Special Publications, 22: 133-187
Habo			China	Pamir–Himalayas–Indochina	102.583	22.8833	35.5	Mo Re-Os	Collision	Porphyry Au	0.4			5.2		2.08	Yang and Cao, 2024, Earth-Science Reviews, 258: 104954; Yang and Cooke, 2019, Society of Economic Geologists Special Publications, 22: 133-187
Machangqing			China	Pamir–Himalayas–Indochina	100.5	25.6667	35.8	Mo Re-Os	Collision	Porphyry Cu-Mo	62	0.5	0.078	0.35	0.31	21.7	Yang and Cao, 2024, Earth-Science Reviews, 258: 104954; Yang and Cooke, 2019, Society of Economic Geologists Special Publications, 22: 133-187
Shangalon			Myanmar	Pamir–Himalayas–Indochina	95.5167	23.7083	38.7	Mo Re-Os	Collision	Porphyry Cu-Au	9	0.23		0.17	0.0207	1.53	Li et al., 2018, Ore Geology Reviews, 102: 829-845; Htut et al., 2019, Ore Geology Reviews, 125: 103678
