# Supplementary material for: Types of Subducted Material Controlling Tethyan Porphyry Copper Mineralization
Source: Research Square preprint supplement (doi:10.21203/rs.3.rs-6037618/v1), 2025-02-26
Supplement: Supplementary file 2 [file 3828e32aaefb2354d3c8e471.xlsx]

## Sheet: Mafic rocks
Supplementary Table 3 Whole-rock elemental and isotopic data for mafic rocks in the Tethyan domain
CITATIONS	TECTONIC SETTING	LOCATION	LOCATION COMMENT	LONGITUDE MIN	LONGITUDE MAX	LATITUDE MIN	LATITUDE MAX	LAND OR SEA	ELEVATION MIN	ELEVATION MAX	SAMPLE NAME	ROCK NAME	MIN. AGE (YRS.)	MAX. AGE (YRS.)	GEOL.	AGE	Setting	Th/Yb	Th/La	Lu/Hf	Ba/La	Rb/Nb	V/Sc	ROCK TEXTURE	ROCK TYPE	DRILL DEPTH MIN	DRILL DEPTHAX	ALTERATION	MINERAL	MATERIAL	SIO2(WT%)	TIO2(WT%)	B2O3(WT%)	AL2O3(WT%)	CR2O3(WT%)	FE2O3(WT%)	FEO(WT%)	FEOT(WT%)	CAO(WT%)	MGO(WT%)	MNO(WT%)	NIO(WT%)	K2O(WT%)	NA2O(WT%)	P2O5(WT%)	H2O(WT%)	H2OP(WT%)	H2OM(WT%)	H2OT(WT%)
[21988]	INTRAPLATE VOLCANICS	ANATOLIA-IRAN BELT - CENOZOIC/QUATERNARY / TURKEY / PONTIDES / ARHAVI GABBROS	ALONG VALLEY OF LOME STREAM, ABOUT 7 KM SW OF ARHAVI TOWN OF ARTVIN	41	41	41	41	SAE			s_ARH-24 [21988]	GABBRO [21988]				CENOZOIC [21988]	Collision	1.16438	0.166667	0.366667	20.7843	20.6	13.84		PLU					WR [21988]	49.67	0.85		18.55	0.005			8.72	10.34	5.16	0.17		1.21	2.29	0.29
[21988]	INTRAPLATE VOLCANICS	ANATOLIA-IRAN BELT - CENOZOIC/QUATERNARY / TURKEY / PONTIDES / HAYRAT GABBROS	EAST SLOPE OF MAKI STREAM, ABOUT 11 KM SE OF HAYRAT TOWN OF TRABZON	41	41	41	41	SAE			s_HR-12 [21988]	GABBRO [21988]				CENOZOIC [21988]	Collision			0.35	23.75	11.5	5.64286		PLU					WR [21988]	47.51	0.27		19.99	0.013			6.78	12.19	8.46	0.17		0.43	1.28	0
[21988]	INTRAPLATE VOLCANICS	ANATOLIA-IRAN BELT - CENOZOIC/QUATERNARY / TURKEY / PONTIDES / S躌MENE GABBROS	AROUND KACALAK HILL, 10 KM SE OF S躌MENE TOWN OF TRABZON	41	41	41	41	SAE			s_KCL-1 [21988]	GABBRO [21988]				CENOZOIC [21988]	Collision	0.497238	0.0989011	0.35	13.6264	7.4	10.3455		PLU					WR [21988]	44.09	1.2		14.66	0.007			13.8	11.45	8.97	0.25		0.7	1.73	0.15
[21988]	INTRAPLATE VOLCANICS	ANATOLIA-IRAN BELT - CENOZOIC/QUATERNARY / TURKEY / PONTIDES / ARHAVI GABBROS	ALONG VALLEY OF LOME STREAM, ABOUT 7 KM SW OF ARHAVI TOWN OF ARTVIN	41	41	41	41	SAE			s_ARH-22 [21988]	GABBRO [21988]				CENOZOIC [21988]	Collision	1.08108	0.129032	0.3125	11.2903	14.4286	13.48		PLU					WR [21988]	47.44	0.82		19.5	0.003			9.16	11.06	5.45	0.19		0.84	2.38	0.36
[21988]	INTRAPLATE VOLCANICS	ANATOLIA-IRAN BELT - CENOZOIC/QUATERNARY / TURKEY / PONTIDES / ARDESEN GABBROS	EAST SLOPE OF DURAK STREAM, ABOUT 6 KM SE OF ARDESEN TOWN OF RIZE	41	41	41	41	SAE			s_ARD-17 [21988]	GABBRO [21988]				CENOZOIC [21988]	Collision			0.3	10.5882	4.14286	11.525		PLU					WR [21988]	40.95	1.82		8.31	0.025			18.63	15.29	10.83	0.25		0.07	0.54	0.05
[22730]	INTRAPLATE VOLCANICS	CENTRAL ASIAN FOLDBELT - CENOZOIC/QUATERNARY / CHINA - CENOZOIC/QUATERNARY / TIBET / GANGDESE BATHOLITH		94.465	94.465	29.454	29.454	SAE			s_T0548-1 [22730]	GABBRO [22730]				PALEOGENE [22730]	Collision	0.637255	0.0696429	0.275168	21.8929	8.38938	9.51743		PLU					WR [22730]	44.8	1.37		18.65		5.6	7.4		9.63	5.59	0.21		1.52	2.89	0.5		0.82
[21988]	INTRAPLATE VOLCANICS	ANATOLIA-IRAN BELT - CENOZOIC/QUATERNARY / TURKEY / PONTIDES / ARDESEN GABBROS	EAST SLOPE OF DURAK STREAM, ABOUT 6 KM SE OF ARDESEN TOWN OF RIZE	41	41	41	41	SAE			s_ARD-2 [21988]	GABBRO [21988]				CENOZOIC [21988]	Collision			0.275	16.1111	16.5	4.87059		PLU					WR [21988]	45.6	0.84		10.42	0.04			11.09	16.88	11.33	0.2		0.16	0.63	0.03
[21988]	INTRAPLATE VOLCANICS	ANATOLIA-IRAN BELT - CENOZOIC/QUATERNARY / TURKEY / PONTIDES / CAYELI GABBROS	5 KM SE OF CAYLI TOWN OF RIZE	41	41	41	41	SAE			s_CY-14 [21988]	GABBRO [21988]				CENOZOIC [21988]	Collision	0.240964	0.148148	0.27	15.1852	7.2	11.2727		PLU					WR [21988]	48.65	0.97		18.94	0.005			10.42	10.81	4.08	0.17		0.34	2.3	0.1
[22730]	INTRAPLATE VOLCANICS	CENTRAL ASIAN FOLDBELT - CENOZOIC/QUATERNARY / CHINA - CENOZOIC/QUATERNARY / TIBET / GANGDESE BATHOLITH		94.465	94.465	29.454	29.454	SAE			s_T0548 [22730]	GABBRO [22730]				PALEOGENE [22730]	Collision	0.264085	0.0289575	0.262195	24.0154	8.89535	9.39948		PLU					WR [22730]	44.86	1.32		18.89		4.99	7.72		9.53	5.66	0.2		1.53	2.91	0.49		0.62
[21988]	INTRAPLATE VOLCANICS	ANATOLIA-IRAN BELT - CENOZOIC/QUATERNARY / TURKEY / PONTIDES / ARHAVI GABBROS	ALONG VALLEY OF LOME STREAM, ABOUT 7 KM SW OF ARHAVI TOWN OF ARTVIN	41	41	41	41	SAE			s_ARH-5 [21988]	GABBRO [21988]				CENOZOIC [21988]	Collision	0.882353	0.15	0.25	8	5	4.21951		PLU					WR [21988]	48.55	0.6		9.66	0.071			8.73	16.74	11.43	0.17		0.25	1.07	0.19
[22730]	INTRAPLATE VOLCANICS	CENTRAL ASIAN FOLDBELT - CENOZOIC/QUATERNARY / CHINA - CENOZOIC/QUATERNARY / TIBET / GANGDESE BATHOLITH		94.441	94.441	29.441	29.441	SAE			s_T0878-6 [22730]	GABBRO [22730]				PALEOGENE [22730]	Collision	0.806897	0.0914062	0.24359	35.8594	7.70642	15.4348		PLU					WR [22730]	46.09	0.85		22.8		4.15	5.48		10.61	2.74	0.11		1.01	3.63	0.86		0.78
[22730]	INTRAPLATE VOLCANICS	CENTRAL ASIAN FOLDBELT - CENOZOIC/QUATERNARY / CHINA - CENOZOIC/QUATERNARY / TIBET / GANGDESE BATHOLITH		94.72	94.72	29.4	29.4	SAE			s_T0594-B1 [22730]	GABBRO [22730]				PALEOGENE [22730]	Collision	0.484615	0.065285	0.238636	18.7565	3.11468	12.1198		PLU					WR [22730]	50.54	0.91		17.83		5.98	4.22		8.88	5.01	0.17		0.43	3.59	0.32		1.22
[22350]	INTRAPLATE VOLCANICS	ANATOLIA-IRAN BELT - CENOZOIC/QUATERNARY / TURKEY / EASTERN ANATOLIAN VOLCANIC BELT / ELAZIG UNIT	PERTEK	39	39	39	39	SAE			s_91ELZ41 [22350]	GABBRO [22350]				CENOZOIC [22350]	Collision	0.230769	0.15	0.233333	48.75	5			PLU					WR [22350]	48.38	0.26		20.86				4.3	14.09	7.38	0.09		0.13	1.81	0.01
[21988]	INTRAPLATE VOLCANICS	ANATOLIA-IRAN BELT - CENOZOIC/QUATERNARY / TURKEY / PONTIDES / ARHAVI GABBROS	ALONG VALLEY OF LOME STREAM, ABOUT 7 KM SW OF ARHAVI TOWN OF ARTVIN	41	41	41	41	SAE			s_ARH-21 [21988]	GABBRO [21988]				CENOZOIC [21988]	Collision	0.6	0.121622	0.233333	11.8919	14.75	8.85714		PLU					WR [21988]	46.02	0.96		19.05	0.004			9.97	12.37	6.38	0.2		0.53	1.8	0.25
[15179]	INTRAPLATE VOLCANICS	ANATOLIA-IRAN BELT - CENOZOIC/QUATERNARY / IRAN / KELBAJAR TROUGH		46	46	40.1	40.1	SAE			s_190/G [15179]	GABBRO [15179]				NEOGENE [15179]	Collision	1.08108	0.173913	0.228571	16.5217	1.1	2.02381		PLU					WR [15179]	49.8	1.15		8.46		5.62	3.33		13.74	12.43	0.18		0.92	2	0.13
[15179]	INTRAPLATE VOLCANICS	ANATOLIA-IRAN BELT - CENOZOIC/QUATERNARY / LESSER CAUCASUS / KELBAJAR TROUGH		46	46	40.1	40.1	SUBAERIAL			s 190/G [15179]	GABBRO [15179]				NEOGENE [15179]	Collision	1.08108	0.173913	0.228571	16.5217	1.1	2.02381		PLUTONIC ROCK					WHOLE_ROCK [15179]	49.8	1.15		8.46		5.62	3.33		13.74	12.43	0.18		0.92	2	0.13
[21988]	INTRAPLATE VOLCANICS	ANATOLIA-IRAN BELT - CENOZOIC/QUATERNARY / TURKEY / PONTIDES / S躌MENE GABBROS	AROUND KACALAK HILL, 10 KM SE OF S躌MENE TOWN OF TRABZON	41	41	41	41	SAE			s_KCL-7 [21988]	GABBRO [21988]				CENOZOIC [21988]	Collision	1.13821	0.177215	0.222222	10.1266	8.54167	6.47692		PLU					WR [21988]	45.27	0.93		14.8	0.026			10.65	14.17	9.48	0.19		0.76	1.5	0.13
[22730]	INTRAPLATE VOLCANICS	CENTRAL ASIAN FOLDBELT - CENOZOIC/QUATERNARY / CHINA - CENOZOIC/QUATERNARY / TIBET / GANGDESE BATHOLITH		94.72	94.72	29.4	29.4	SAE			s_T0594-B2 [22730]	GABBRO [22730]				PALEOGENE [22730]	Collision	0.5	0.0602537	0.213483	19.3446	3.34848	12.6601		PLU					WR [22730]	50.73	0.84		17.98		5.83	4.22		8.78	4.93	0.17		0.46	3.65	0.32		1.1
[21988]	INTRAPLATE VOLCANICS	ANATOLIA-IRAN BELT - CENOZOIC/QUATERNARY / TURKEY / PONTIDES / ARHAVI GABBROS	ALONG VALLEY OF LOME STREAM, ABOUT 7 KM SW OF ARHAVI TOWN OF ARTVIN	41	41	41	41	SAE			s_ARH-1 [21988]	GABBRO [21988]				CENOZOIC [21988]	Collision	0.701754	0.163265	0.211111	10.6122	7.15385	4.8642		PLU					WR [21988]	48.2	0.69		10.76	0.019			9.69	15.48	10.4	0.22		0.5	1.27	0.13
[21988]	INTRAPLATE VOLCANICS	ANATOLIA-IRAN BELT - CENOZOIC/QUATERNARY / TURKEY / PONTIDES / S躌MENE GABBROS	AROUND KACALAK HILL, 10 KM SE OF S躌MENE TOWN OF TRABZON	41	41	41	41	SAE			s_KCL-10 [21988]	GABBRO [21988]				CENOZOIC [21988]	Collision	2.13675	0.263158	0.211111	22.9474	10.5806	15.3462		PLU					WR [21988]	49.46	0.97		18.87	0.003			9.17	10.97	4.59	0.18		1	2.29	0.16
[23277]	INTRAPLATE VOLCANICS	CENTRAL ASIAN FOLDBELT - CENOZOIC/QUATERNARY / CHINA - CENOZOIC/QUATERNARY / TIBET / CONFLUENCE GABBRO		95	95	29.5	29.5	SAE			s_T1339 [23277]	GABBRO, HORNBLENDE [23277]				EOCENE [23277]	Collision	3.09503	0.215827	0.20551	7.55753	1.47199	10.2041		PLU					WR [23277]	44.965	1.204		16.672				11.31	11.731	6.377	0.171		0.88	2.003	0.287
[22730]	INTRAPLATE VOLCANICS	CENTRAL ASIAN FOLDBELT - CENOZOIC/QUATERNARY / CHINA - CENOZOIC/QUATERNARY / TIBET / GANGDESE BATHOLITH		94.72	94.72	29.4	29.4	SAE			s_T0594-B3 [22730]	GABBRO [22730]				PALEOGENE [22730]	Collision	0.342466	0.0509684	0.20354	19.2661	2.26792	13.4703		PLU					WR [22730]	49.73	1.18		17.69		6.42	4.69		8.58	5.2	0.2		0.52	3.59	0.37		1.32
[21988]	INTRAPLATE VOLCANICS	ANATOLIA-IRAN BELT - CENOZOIC/QUATERNARY / TURKEY / PONTIDES / ARHAVI GABBROS	ALONG VALLEY OF LOME STREAM, ABOUT 7 KM SW OF ARHAVI TOWN OF ARTVIN	41	41	41	41	SAE			s_ARH-8 [21988]	GABBRO [21988]				CENOZOIC [21988]	Collision	0.481928	0.148148	0.2	9.25926	9.6	3.48101		PLU					WR [21988]	47.38	0.44		9.5	0.065			9.04	16.28	13.14	0.19		0.2	0.54	0.07
[21988]	INTRAPLATE VOLCANICS	ANATOLIA-IRAN BELT - CENOZOIC/QUATERNARY / TURKEY / PONTIDES / ARHAVI GABBROS	ALONG VALLEY OF LOME STREAM, ABOUT 7 KM SW OF ARHAVI TOWN OF ARTVIN	41	41	41	41	SAE			s_ARH-14 [21988]	GABBRO [21988]				CENOZOIC [21988]	Collision	0.603448	0.166667	0.2	15.9524	16.125	11.94		PLU					WR [21988]	44.24	1.26		14.19	0.031			12.21	13.89	8.77	0.22		0.5	1.49	0.11
[22730]	INTRAPLATE VOLCANICS	CENTRAL ASIAN FOLDBELT - CENOZOIC/QUATERNARY / CHINA - CENOZOIC/QUATERNARY / TIBET / GANGDESE BATHOLITH		94.441	94.441	29.441	29.441	SAE			s_T0878-1 [22730]	GABBRO [22730]				PALEOGENE [22730]	Collision	0.753333	0.126257	0.196347	31.2291	6.64013	10.1172		PLU					WR [22730]	44.32	1.35		17.91		3.92	9.61		10.1	6.2	0.21		1.46	2.6	0.37		0.72
[23277]	INTRAPLATE VOLCANICS	CENTRAL ASIAN FOLDBELT - CENOZOIC/QUATERNARY / CHINA - CENOZOIC/QUATERNARY / TIBET / CONFLUENCE GABBRO		95	95	29.5	29.5	SAE			s_14GT007 [23277]	GABBRO, HORNBLENDE [23277]				EOCENE [23277]	Collision	1.68783	0.162752	0.1962	10.9502	8.10895	10.5865		PLU					WR [23277]	50.26	1.34		19.35				8.67	8.29	3.61	0.14		1.47	3.73	0.35
[11867]	INTRAPLATE VOLCANICS	ANATOLIA-IRAN BELT - CENOZOIC/QUATERNARY / ANATOLIA / WESTERN ANATOLIAN VOLCANIC BELT	BIGA PENINSULA	26	27	39.5	40	SUBAERIAL			s 102 [11867]	BASALT [11867]				CENOZOIC [11867]	Collision	1.32948	0.191667	0.19375	25.6667	5.66667	9.10714		VOLCANIC ROCK					WHOLE_ROCK [11867]	48.83	0.83		19.01				8.52	10.84	5.06	0.14		0.79	2.78	0.16
[21988]	INTRAPLATE VOLCANICS	ANATOLIA-IRAN BELT - CENOZOIC/QUATERNARY / TURKEY / PONTIDES / ARHAVI GABBROS	ALONG VALLEY OF LOME STREAM, ABOUT 7 KM SW OF ARHAVI TOWN OF ARTVIN	41	41	41	41	SAE			s_ARH-20 [21988]	GABBRO [21988]				CENOZOIC [21988]	Collision	1.06918	0.129771	0.192308	11.145	21.8182	14.24		PLU					WR [21988]	47.41	0.85		19.37	0.002			9.2	10.82	5.33	0.18		0.93	2.43	0.36
[22350]	INTRAPLATE VOLCANICS	ANATOLIA-IRAN BELT - CENOZOIC/QUATERNARY / TURKEY / EASTERN ANATOLIAN VOLCANIC BELT / ELAZIG UNIT	PERTEK	39	39	39	39	SAE			s_91ELZ07 [22350]	GABBRO [22350]				CENOZOIC [22350]	Collision	0.266667	0.0851064	0.191667	13.1915	2.16667			PLU					WR [22350]	49.88	0.63		19.45				10.29	9.01	2.91	0.27		0.89	3.76	0.31
[22730]	INTRAPLATE VOLCANICS	CENTRAL ASIAN FOLDBELT - CENOZOIC/QUATERNARY / CHINA - CENOZOIC/QUATERNARY / TIBET / GANGDESE BATHOLITH		94.72	94.72	29.4	29.4	SAE			s_T0594-B4 [22730]	GABBRO [22730]				PALEOGENE [22730]	Collision	0.276786	0.0574074	0.190751	15.9259	1.47099	11.4618		PLU					WR [22730]	49.34	1.14		17.27		6.68	4.83		8.93	5.36	0.19		0.44	3.63	0.32		1.04
[16034]	INTRAPLATE VOLCANICS	ANATOLIA-IRAN BELT - CENOZOIC/QUATERNARY / ANATOLIA / WESTERN ANATOLIAN VOLCANIC BELT	DENIZLI	26.75	26.75	38.37	38.37	SUBAERIAL			s 2104/1 [16034]	LAMPROITE [16034]				NEOGENE [16034]	Collision	19.4152	0.855132	0.188696	8.95788	0.94043	6.45459		VOLCANIC ROCK					WHOLE_ROCK [16034]	56.53	0.9		14.5				4.79	6.2	3.96	0.09		4.69	4.04	0.77
[21988]	INTRAPLATE VOLCANICS	ANATOLIA-IRAN BELT - CENOZOIC/QUATERNARY / TURKEY / PONTIDES / CAYELI GABBROS	5 KM SE OF CAYLI TOWN OF RIZE	41	41	41	41	SAE			s_CY-26 [21988]	GABBRO [21988]				CENOZOIC [21988]	Collision	0.194175	0.105263	0.1875	12.1053	2.75	7.23529		PLU					WR [21988]	47.76	0.61		20.18	0.012			8.15	12.75	5.35	0.15		0.02	1.99	0.07
[22439]	INTRAPLATE VOLCANICS	ANATOLIA-IRAN BELT - CENOZOIC/QUATERNARY / TURKEY / EASTERN ANATOLIAN VOLCANIC BELT / MADEN COMPLEX		38.5734	38.5734	38.2591	38.2591	SAE			s_37PTR [22439]	DIABASE [22439]				EOCENE [22439]	Collision	0.385366	0.11791	0.183432	59.5522	11.1333	5.00305		PLU					WR [22439]	49.21	1.14		17.02				7.13	8.95	7.21	0.13		2.36	2.84	0.14
[18377]	INTRAPLATE VOLCANICS	ANATOLIA-IRAN BELT - CENOZOIC/QUATERNARY / ANATOLIA / EASTERN PONTIDES	GÜMÜSHANE (KALE) AREA	39.49	39.49	40.45	40.45	SUBAERIAL			s M29 [18377]	TRACHYANDESITE, BASALTIC [18377]				NEOGENE [18377]	Collision	0.230769	0.0485961	0.18239	26.4579	2.72446			VOLCANIC ROCK					WHOLE_ROCK [18377]	52.18	0.76		20.3				7.07	7.91	3.24	0.17		0.94	4.43	0.2
[23277]	INTRAPLATE VOLCANICS	CENTRAL ASIAN FOLDBELT - CENOZOIC/QUATERNARY / CHINA - CENOZOIC/QUATERNARY / TIBET / CONFLUENCE GABBRO		95	95	29.5	29.5	SAE			s_T1337 [23277]	GABBRO, HORNBLENDE [23277]				EOCENE [23277]	Collision	1.98526	0.151328	0.180626	15.0461	9.28317	9.988		PLU					WR [23277]	47.41	1.201		17.236				11.46	8.389	4.804	0.2		2.305	2.746	0.421
[23277]	INTRAPLATE VOLCANICS	CENTRAL ASIAN FOLDBELT - CENOZOIC/QUATERNARY / CHINA - CENOZOIC/QUATERNARY / TIBET / CONFLUENCE GABBRO		95	95	29.5	29.5	SAE			s_T1334 [23277]	GABBRO, HORNBLENDE [23277]				EOCENE [23277]	Collision	1.37752	0.159474	0.180352	11.1373	2.27364	11.0039		PLU					WR [23277]	46.681	1.225		15.884				12.41	10.218	5.632	0.213		1.177	2.511	0.274
[22439]	INTRAPLATE VOLCANICS	ANATOLIA-IRAN BELT - CENOZOIC/QUATERNARY / TURKEY / EASTERN ANATOLIAN VOLCANIC BELT / MADEN COMPLEX		39.5634	39.5634	38.3825	38.3825	SAE			s_85MA [22439]	DIABASE [22439]				EOCENE [22439]	Collision	0.438914	0.13662	0.180328	6.33803	2.53958	7.36605		PLU					WR [22439]	49.87	1.17		16.29				8.09	6.09	7.92	0.12		0.78	4.77	0.16
[12404]	INTRAPLATE VOLCANICS	ANATOLIA-IRAN BELT - CENOZOIC/QUATERNARY / ANATOLIA / CENTRAL ANATOLIAN VOLCANIC BELT / HAMAMÖZÜ FORMATION		34.7028	34.7028	41.0943	41.0943	SUBAERIAL			s COM-1 [12404]	BASALT, OLIVINE [12404]			MIDDLE [12404]	EOCENE [12404]	Collision	1.27389	0.185185	0.18	29.2593	24.9524	7.21911		VOLCANIC ROCK					WHOLE_ROCK [12404]	49.2718	0.835115		14.2071				9.21	9.31867	12.0277	0.173134		1.63968	1.95539	0.336083
[21988]	INTRAPLATE VOLCANICS	ANATOLIA-IRAN BELT - CENOZOIC/QUATERNARY / TURKEY / PONTIDES / ARHAVI GABBROS	ALONG VALLEY OF LOME STREAM, ABOUT 7 KM SW OF ARHAVI TOWN OF ARTVIN	41	41	41	41	SAE			s_ARH-16 [21988]	GABBRO [21988]				CENOZOIC [21988]	Collision	1.13821	0.304348	0.18	12.8261	18.5714	7.15789		PLU					WR [21988]	47.66	0.91		13.82	0.029			10.42	13.4	8.76	0.18		0.54	1.65	0.18
[22884]	INTRAPLATE VOLCANICS	CENTRAL ASIAN FOLDBELT - CENOZOIC/QUATERNARY / CHINA - CENOZOIC/QUATERNARY / TIBET / GANGDESE BATHOLITH - QUXU INTRUSIVE COMPLEX		94.7	94.7	29.4	29.4	SAE			s_16TB-46 [22884]	GABBRONORITE, PYROXENE-HORNBLENDE [22884]				EOCENE [22884]	Collision	0.640351	0.0675926	0.18	22.2222	3.14341	11.2291		PLU					WR [22884]	52.8	0.82		19.05				8.04	8.01	4.82	0.16		0.77	4.48	0.31
[23277]	INTRAPLATE VOLCANICS	CENTRAL ASIAN FOLDBELT - CENOZOIC/QUATERNARY / CHINA - CENOZOIC/QUATERNARY / TIBET / CONFLUENCE GABBRO		95	95	29.5	29.5	SAE			s_T1340 [23277]	GABBRO, HORNBLENDE [23277]				EOCENE [23277]	Collision	0.753557	0.11151	0.177502	37.6338	10.8911	11.2666		PLU					WR [23277]	46.99	0.803		21.143				9.06	10.368	3.637	0.143		1.473	2.769	0.324
[21988]	INTRAPLATE VOLCANICS	ANATOLIA-IRAN BELT - CENOZOIC/QUATERNARY / TURKEY / PONTIDES / S躌MENE GABBROS	AROUND KACALAK HILL, 10 KM SE OF S躌MENE TOWN OF TRABZON	41	41	41	41	SAE			s_KCL-3 [21988]	GABBRO [21988]				CENOZOIC [21988]	Collision	1.16279	0.170455	0.172727	10	18.0625	8.3913		PLU					WR [21988]	46.86	0.94		15.91	0.026			10.69	11.85	8.69	0.21		0.91	1.66	0.12
[22439]	INTRAPLATE VOLCANICS	ANATOLIA-IRAN BELT - CENOZOIC/QUATERNARY / TURKEY / EASTERN ANATOLIAN VOLCANIC BELT / MADEN COMPLEX		38.6225	38.6225	38.2604	38.2604	SAE			s_38PTR [22439]	DIABASE [22439]				EOCENE [22439]	Collision	2.04167	0.134986	0.172249	10.1928	0.526705	9.08621		PLU					WR [22439]	47.34	1.09		16.04				9.3	10.06	6.2	0.16		0.83	4.01	0.27
[23277]	INTRAPLATE VOLCANICS	CENTRAL ASIAN FOLDBELT - CENOZOIC/QUATERNARY / CHINA - CENOZOIC/QUATERNARY / TIBET / CONFLUENCE GABBRO		95	95	29.5	29.5	SAE			s_T1336 [23277]	GABBRO, HORNBLENDE [23277]				EOCENE [23277]	Collision	2.42618	0.25848	0.170611	25.9916	6.07193	11.061		PLU					WR [23277]	53.059	0.976		15.472				9.89	7.876	4.375	0.172		1.598	2.431	0.229
[23277]	INTRAPLATE VOLCANICS	CENTRAL ASIAN FOLDBELT - CENOZOIC/QUATERNARY / CHINA - CENOZOIC/QUATERNARY / TIBET / CONFLUENCE GABBRO		95	95	29.5	29.5	SAE			s_T1332 [23277]	GABBRO, HORNBLENDE [23277]				EOCENE [23277]	Collision	1.84636	0.154728	0.170435	15.8906	9.28381	9.97923		PLU					WR [23277]	46.005	1.164		19.306				10.52	9.157	4.381	0.201		1.83	3.418	0.542
[22730]	INTRAPLATE VOLCANICS	CENTRAL ASIAN FOLDBELT - CENOZOIC/QUATERNARY / CHINA - CENOZOIC/QUATERNARY / TIBET / GANGDESE BATHOLITH		94.72	94.72	29.4	29.4	SAE			s_T0594-B5 [22730]	GABBRO [22730]				PALEOGENE [22730]	Collision	0.367742	0.0579858	0.170213	19.0234	2.57384	10.9544		PLU					WR [22730]	50.86	0.99		18.26		5.71	4.44		8.96	4.93	0.19		0.48	3.83	0.31		0.58
[15179]	INTRAPLATE VOLCANICS	ANATOLIA-IRAN BELT - CENOZOIC/QUATERNARY / IRAN / KELBAJAR TROUGH		46	46	40.1	40.1	SAE			s_194/A [15179]	GABBRO [15179]				NEOGENE [15179]	Collision	1.7	0.075	0.167742	6.47059	0.578947	5		PLU					WR [15179]	45.94	1.58		13.09		9.66	1.74		13.47	8.13	0.19		0.89	2.99	1.7
[15179]	INTRAPLATE VOLCANICS	ANATOLIA-IRAN BELT - CENOZOIC/QUATERNARY / LESSER CAUCASUS / KELBAJAR TROUGH		46	46	40.1	40.1	SUBAERIAL			s 194/A [15179]	GABBRO [15179]				NEOGENE [15179]	Collision	1.7	0.075	0.167742	6.47059	0.578947	5		PLUTONIC ROCK					WHOLE_ROCK [15179]	45.94	1.58		13.09		9.66	1.74		13.47	8.13	0.19		0.89	2.99	1.7
[23277]	INTRAPLATE VOLCANICS	CENTRAL ASIAN FOLDBELT - CENOZOIC/QUATERNARY / CHINA - CENOZOIC/QUATERNARY / TIBET / CONFLUENCE GABBRO		95	95	29.5	29.5	SAE			s_16GT010 [23277]	GABBRO, HORNBLENDE [23277]				EOCENE [23277]	Collision	1.06116	0.092275	0.160095	16.8614	9.89956	9.37018		PLU					WR [23277]	46.35	1.18		19.91				11.04	9.1	4.64	0.14		1.47	3.15	0.58
[21987]	INTRAPLATE VOLCANICS	ANATOLIA-IRAN BELT - CENOZOIC/QUATERNARY / ARMENIA / ZANGEZUR BLOCK / MEGHRI-ORDUBAD PLUTON		46.2214	46.2214	39.1026	39.1026	SAE			s_KJ-12-07 [21987]	GABBRO, HORNBLENDE [21987]				CENOZOIC [21987]	Collision	1.27586	0.0587302	0.16	7.12698	1.36364	15.7419		PLU					WR [21987]	42.07	1.67		18.5				11.64	12.84	6.55	0.2		0.64	2.62	1.24
[21988]	INTRAPLATE VOLCANICS	ANATOLIA-IRAN BELT - CENOZOIC/QUATERNARY / TURKEY / PONTIDES / SAMSUN GABBROS	SAMSUN REGION	37	37	41	41	SAE			s_MD-2 [21988]	GABBRO [21988]				CENOZOIC [21988]	Collision			0.16	42.8571	2.25	9.55102		PLU					WR [21988]	40.93	1.16		15.22	0.006			13.72	15.84	9.06	0.18		0.27	1.18	0.04
[22730]	INTRAPLATE VOLCANICS	CENTRAL ASIAN FOLDBELT - CENOZOIC/QUATERNARY / CHINA - CENOZOIC/QUATERNARY / TIBET / GANGDESE BATHOLITH		94.434	94.434	29.446	29.446	SAE			s_T0580-D2-2 [22730]	GABBRO [22730]				PALEOGENE [22730]	Collision	1.18707	0.21411	0.158672	47.2393	6.62319	8.69048		PLU					WR [22730]	46.94	1.07		18.71		4.59	6.27		8.88	5	0.19		1.78	3.6	0.41		1.1
[22730]	INTRAPLATE VOLCANICS	CENTRAL ASIAN FOLDBELT - CENOZOIC/QUATERNARY / CHINA - CENOZOIC/QUATERNARY / TIBET / GANGDESE BATHOLITH		90.313	90.313	29.318	29.318	SAE			s_T1034-GR-1 [22730]	GABBRO [22730]				PALEOGENE [22730]	Collision	0.969697	0.0629921	0.158537	43.3071	21.3992	13.3047		PLU					WR [22730]	49.82	0.91		16.73		4.3	5.25		9.98	5.06	0.2		3.02	2.65	0.58		1.12
[21240]	INTRAPLATE VOLCANICS	ANATOLIA-IRAN BELT - CENOZOIC/QUATERNARY / ARMENIA / ZANGEZUR BLOCK / MEGHRI-ORDUBAD PLUTON		46.2215	46.2215	39.1027	39.1027	SAE			s_MR1402 [21240]	GABBRO, HORNBLENDE [21240]				CENOZOIC [21240]	Collision	1.61502	0.0639744	0.15358	6.67146	0.973415			PLU					WR [21240]	41.6851	1.46211		19.0373				10.695	12.8905	6.84308	0.208873		0.686297	2.2976	1.23335
[22730]	INTRAPLATE VOLCANICS	CENTRAL ASIAN FOLDBELT - CENOZOIC/QUATERNARY / CHINA - CENOZOIC/QUATERNARY / TIBET / GANGDESE BATHOLITH		94.441	94.441	29.441	29.441	SAE			s_T0878-5 [22730]	GABBRO [22730]				PALEOGENE [22730]	Collision	1.32189	0.118008	0.151111	17.931	7.07792	12.1673		PLU					WR [22730]	44.49	1.11		20.31		5	6.99		10.47	3.83	0.16		1.13	3.14	1.03		0.94
[19373]	INTRAPLATE VOLCANICS	CENTRAL ASIAN FOLDBELT - CENOZOIC/QUATERNARY / CHINA - CENOZOIC/QUATERNARY / TIBET	YAJIE, WESTERN GANGDESE BELT	80.19	80.19	31.8536	31.8536	SAE	4615	4615	s_WR-12-45 [19373]	GABBRO [19373]				PALEOGENE [19373]	Collision	0.83871	0.106433	0.149565	6.90058	4.74359	8.46821	EQUIGRANULAR [19373]	PLU					WR [19373]	49.68	1.31		16.87				10.39	9.63	5.42	0.19		0.8	3.35	0.29
[22730]	INTRAPLATE VOLCANICS	CENTRAL ASIAN FOLDBELT - CENOZOIC/QUATERNARY / CHINA - CENOZOIC/QUATERNARY / TIBET / GANGDESE BATHOLITH		90.313	90.313	29.318	29.318	SAE			s_T1034-GR-2 [22730]	GABBRO [22730]				PALEOGENE [22730]	Collision	1.32642	0.0904594	0.147959	29.258	12.6706	13.5965		PLU					WR [22730]	50.36	0.88		16.8		4.27	5.4		9.73	4.87	0.22		2.07	3.4	0.59		1.04
[22730]	INTRAPLATE VOLCANICS	CENTRAL ASIAN FOLDBELT - CENOZOIC/QUATERNARY / CHINA - CENOZOIC/QUATERNARY / TIBET / GANGDESE BATHOLITH		90.313	90.313	29.318	29.318	SAE			s_T1034-GR-3 [22730]	GABBRO [22730]				PALEOGENE [22730]	Collision	0.868293	0.060339	0.147059	44.4407	30.1835	13.4686		PLU					WR [22730]	49.71	0.88		16.74		4.27	5.6		10.04	5.06	0.2		2.88	2.78	0.6		0.96
[12404]	INTRAPLATE VOLCANICS	ANATOLIA-IRAN BELT - CENOZOIC/QUATERNARY / ANATOLIA / CENTRAL ANATOLIAN VOLCANIC BELT / HAMAMÖZÜ FORMATION		34.69	34.69	40.7779	40.7779	SUBAERIAL			s COM-74 [12404]	ANDESITE, PYROXENE [12404]			MIDDLE [12404]	EOCENE [12404]	Collision	2.0765	0.306452	0.145	28.7097	14.2973	5.38845		VOLCANIC ROCK					WHOLE_ROCK [12404]	52.5309	0.797628		13.3347				8.23	10.9418	8.53871	0.15339		2.13723	2.18836	0.235198
[22730]	INTRAPLATE VOLCANICS	CENTRAL ASIAN FOLDBELT - CENOZOIC/QUATERNARY / CHINA - CENOZOIC/QUATERNARY / TIBET / GANGDESE BATHOLITH		90.313	90.313	29.318	29.318	SAE			s_T1034-GR-4 [22730]	GABBRO [22730]				PALEOGENE [22730]	Collision	1.05435	0.076378	0.144509	51.378	23.299	13.4008		PLU					WR [22730]	49.22	0.85		17.2		4.73	5.21		10.2	4.95	0.19		2.74	2.68	0.51		0.72
[22730]	INTRAPLATE VOLCANICS	CENTRAL ASIAN FOLDBELT - CENOZOIC/QUATERNARY / CHINA - CENOZOIC/QUATERNARY / TIBET / GANGDESE BATHOLITH		94.441	94.441	29.441	29.441	SAE			s_T0878-2 [22730]	GABBRO [22730]				PALEOGENE [22730]	Collision	0.981685	0.144865	0.143939	20.6486	5.96987	8.63636		PLU					WR [22730]	45.83	1.1		19.47		3.53	7.67		10.08	4.55	0.17		1.26	3.24	0.75		0.44
[22730]	INTRAPLATE VOLCANICS	CENTRAL ASIAN FOLDBELT - CENOZOIC/QUATERNARY / CHINA - CENOZOIC/QUATERNARY / TIBET / GANGDESE BATHOLITH		94.434	94.434	29.446	29.446	SAE			s_T0580-D2-3 [22730]	GABBRO [22730]				PALEOGENE [22730]	Collision	7	0.321691	0.143939	16.2132	8.51979	8.76221		PLU					WR [22730]	48.15	1.13		18.65		3.69	6.81		8.74	5.01	0.19		1.89	3.42	0.4		0.56
[22439]	INTRAPLATE VOLCANICS	ANATOLIA-IRAN BELT - CENOZOIC/QUATERNARY / TURKEY / EASTERN ANATOLIAN VOLCANIC BELT / MADEN COMPLEX		39.6479	39.6479	38.4252	38.4252	SAE			s_51MA [22439]	DIABASE [22439]				EOCENE [22439]	Collision	0.739796	0.140777	0.143519	21.3592	5.25172	8.56226		PLU					WR [22439]	49.37	1.06		17.79				8.66	3.8	8.43	0.22		2.19	3.42	0.16
[22439]	INTRAPLATE VOLCANICS	ANATOLIA-IRAN BELT - CENOZOIC/QUATERNARY / TURKEY / EASTERN ANATOLIAN VOLCANIC BELT / MADEN COMPLEX		39.6368	39.6368	38.4526	38.4526	SAE			s_32MA [22439]	DIABASE [22439]				EOCENE [22439]	Collision	0.779487	0.138182	0.14218	3	0.137143	6.02182		PLU					WR [22439]	49.83	0.99		18.85				6.63	3.29	9	0.19		0.06	5.84	0.22
[22884]	INTRAPLATE VOLCANICS	CENTRAL ASIAN FOLDBELT - CENOZOIC/QUATERNARY / CHINA - CENOZOIC/QUATERNARY / TIBET / GANGDESE BATHOLITH - QUXU INTRUSIVE COMPLEX		94.7	94.7	29.4	29.4	SAE			s_16TB-33 [22884]	GABBRONORITE, PYROXENE-HORNBLENDE [22884]				EOCENE [22884]	Collision	0.415663	0.0575	0.142012	17.5	3.07087	10.1653		PLU					WR [22884]	51.15	0.83		18.44				8.35	9.1	5.29	0.15		0.77	4.12	0.33
[12404]	INTRAPLATE VOLCANICS	ANATOLIA-IRAN BELT - CENOZOIC/QUATERNARY / ANATOLIA / CENTRAL ANATOLIAN VOLCANIC BELT / HAMAMÖZÜ FORMATION		35.0199	35.0199	40.7442	40.7442	SUBAERIAL			s COM-42 [12404]	BASALT, OLIVINE [12404]			MIDDLE [12404]	EOCENE [12404]	Collision	2.24242	0.24183	0.141176	32.7451	15.2143	6.56756		VOLCANIC ROCK					WHOLE_ROCK [12404]	50.3724	0.795837		13.9578				8.91	11.8967	8.78482	0.173452		1.91817	1.89777	0.295888
[22730]	INTRAPLATE VOLCANICS	CENTRAL ASIAN FOLDBELT - CENOZOIC/QUATERNARY / CHINA - CENOZOIC/QUATERNARY / TIBET / GANGDESE BATHOLITH		94.434	94.434	29.446	29.446	SAE			s_T0580-D2-1 [22730]	GABBRO [22730]				PALEOGENE [22730]	Collision	4.84277	0.228148	0.140625	10.2222	4.71186	9.05028		PLU					WR [22730]	46.19	1.15		19.12		4.23	7.06		10.13	5.17	0.2		1.25	3.3	0.44		0.64
[12761]	INTRAPLATE VOLCANICS	ANATOLIA-IRAN BELT - CENOZOIC/QUATERNARY / IRAN / URUMIEH-DOKHTAR ARC	SW QOM	50.375	50.375	34.484	34.484	SUBAERIAL			s Q02B [12761]	TRACHYDACITE [12761]				NEOGENE [12761]	Collision	1.60338	0.286792	0.139706	15.0189	0.487013	8.6129		VOLCANIC ROCK					WHOLE_ROCK [12761]	50.5	1.26		17.25		3.2	6.72		9.41	4.74	0.12		0.2	2.87	0.22
[19015]	INTRAPLATE VOLCANICS	ANATOLIA-IRAN BELT - CENOZOIC/QUATERNARY / ANATOLIA / CENTRAL ANATOLIAN VOLCANIC BELT / NIGDE	GÖLLÜDAG	34.5306	34.5306	38.3431	38.3431	SUBAERIAL	1373	1373	s G-C2 [19015]	BASALT [19015]				QUATERNARY [19015]	Collision	0.653061	0.115108	0.139286	14.3885	0.714286	8.125		VOLCANIC ROCK					WHOLE_ROCK [19015]	49.3	1.49		18.4	0.01			8.81	9.9	6.12	0.17		0.55	3.76	0.25
[22884]	INTRAPLATE VOLCANICS	CENTRAL ASIAN FOLDBELT - CENOZOIC/QUATERNARY / CHINA - CENOZOIC/QUATERNARY / TIBET / GANGDESE BATHOLITH - QUXU INTRUSIVE COMPLEX		94.7	94.7	29.4	29.4	SAE			s_16TB-35 [22884]	GABBRONORITE, PYROXENE-HORNBLENDE [22884]				EOCENE [22884]	Collision	0.292035	0.0394265	0.137097	25.5675	1.50958	10.7692		PLU					WR [22884]	51.41	0.89		18.14				8.26	8.93	6.18	0.15		0.61	4.06	0.16
[23501]	INTRAPLATE VOLCANICS	ANATOLIA-IRAN BELT - CENOZOIC/QUATERNARY / TURKEY / EASTERN ANATOLIAN VOLCANIC BELT / TASLICAY INTRUSION		43	43	39.5	39.5	SAE			s_E208A [23501]	GABBRO [23501]			LOWER [23501]	MIOCENE [23501]	Collision	1.95833	0.191057	0.136	11.9919	2.04301	7.54839		PLU					WR [23501]	51.66	0.81		16.92				7.88	10.47	5.87	0.16		1.16	2.99	0.17
[10699][13304]	INTRAPLATE VOLCANICS	ANATOLIA-IRAN BELT - CENOZOIC/QUATERNARY / ANATOLIA / EASTERN ANATOLIAN VOLCANIC BELT / HORASAN FORMATION	HORASAN AREA, ERZURUM-KARS PLATEAU	42.1728	42.1728	40.0458	40.0458	SUBAERIAL			s MK139 [10699]	BASALT [10699]	1500000 [13304]	11000000 [13304]		NEOGENE [10699]	Collision	0.696203	0.122222	0.134615	34.1481	0.818182	6.31034		VOLCANIC ROCK					WHOLE_ROCK [10699]	49.7	1.47		17.03				8.79	9.78	7.06	0.15		0.73	4.06	0.31
[23277]	INTRAPLATE VOLCANICS	CENTRAL ASIAN FOLDBELT - CENOZOIC/QUATERNARY / CHINA - CENOZOIC/QUATERNARY / TIBET / CONFLUENCE GABBRO		95	95	29.5	29.5	SAE			s_14GT005 [23277]	GABBRO, HORNBLENDE [23277]				EOCENE [23277]	Collision	0.211082	0.0253795	0.133932	12.0459	3.979	10.9452		PLU					WR [23277]	44.85	1.44		18.68				10.12	10.51	6.02	0.17		1.14	2.65	0.37
[21988]	INTRAPLATE VOLCANICS	ANATOLIA-IRAN BELT - CENOZOIC/QUATERNARY / TURKEY / PONTIDES / SAMSUN GABBROS	SAMSUN REGION	37	37	41	41	SAE			s_MD-17 [21988]	GABBRO [21988]				CENOZOIC [21988]	Collision			0.133333	61.3043	5.5	12.675		PLU					WR [21988]	40.92	1.17		17.11	0.004			13.09	15.97	7.89	0.17		0.23	1.15	0.03
[22730]	INTRAPLATE VOLCANICS	CENTRAL ASIAN FOLDBELT - CENOZOIC/QUATERNARY / CHINA - CENOZOIC/QUATERNARY / TIBET / GANGDESE BATHOLITH		90.313	90.313	29.318	29.318	SAE			s_T1034-GR-5 [22730]	GABBRO [22730]				PALEOGENE [22730]	Collision	1.33962	0.0981567	0.132948	65.1613	23.6364	13.1081		PLU					WR [22730]	50.21	0.82		16.75		4.59	4.98		9.79	4.9	0.2		2.97	2.81	0.52		0.82
[10699][13304]	INTRAPLATE VOLCANICS	ANATOLIA-IRAN BELT - CENOZOIC/QUATERNARY / ANATOLIA / EASTERN ANATOLIAN VOLCANIC BELT / KARGAPAZARI / KARAPINAR FORMATION	ERZURUM-KARS PLATEAU	41.5833	41.5833	40.1167	40.1167	SUBAERIAL			s MK289 [10699]	BASALT [10699]	1500000 [13304]	11000000 [13304]		NEOGENE [10699]	Collision	0.498084	0.105691	0.132258	11.626	0.135802	5.82143		VOLCANIC ROCK					WHOLE_ROCK [10699]	49.1	1.26		16.92				9.5	10.13	7.02	0.15		0.51	3.11	0.26
[12404]	INTRAPLATE VOLCANICS	ANATOLIA-IRAN BELT - CENOZOIC/QUATERNARY / ANATOLIA / CENTRAL ANATOLIAN VOLCANIC BELT / HAMAMÖZÜ FORMATION		34.7148	34.7148	40.7489	40.7489	SUBAERIAL			s COM-78 [12404]	ANDESITE, PYROXENE [12404]			MIDDLE [12404]	EOCENE [12404]	Collision	2.21622	0.310606	0.131579	28.7121	13	6.01474		VOLCANIC ROCK					WHOLE_ROCK [12404]	52.446	0.805137		13.6466				8.21	10.4872	8.89727	0.152874		1.9466	2.23196	0.264982
[10699]	INTRAPLATE VOLCANICS	ANATOLIA-IRAN BELT - CENOZOIC/QUATERNARY / ANATOLIA / EASTERN ANATOLIAN VOLCANIC BELT / KISLAKOY MEMBER	PASINLER AREA, ERZURUM-KARS PLATEAU	41.6831	41.6831	39.9822	39.9822	SUBAERIAL			s MK364 [10699]	ANDESITE, BASALTIC [10699]				NEOGENE [10699]	Collision	1.3	0.205263	0.12963	20.6015	1.4	9.03333		VOLCANIC ROCK					WHOLE_ROCK [10699]	53.8	1.01		18.24				7.68	9.45		0.15		1.01	2.87	0.18
[23277]	INTRAPLATE VOLCANICS	CENTRAL ASIAN FOLDBELT - CENOZOIC/QUATERNARY / CHINA - CENOZOIC/QUATERNARY / TIBET / CONFLUENCE GABBRO		95	95	29.5	29.5	SAE			s_14GT004 [23277]	GABBRO, HORNBLENDE [23277]				EOCENE [23277]	Collision	1.08792	0.201313	0.129085	22.3144	6.50396	5.89276		PLU					WR [23277]	47.62	1.7		20.19				9.18	8.46	3.25	0.16		2.1	3.61	0.54
[12011]	INTRAPLATE VOLCANICS	ANATOLIA-IRAN BELT - CENOZOIC/QUATERNARY / ANATOLIA / EASTERN ANATOLIAN VOLCANIC BELT / YAMADAG	ARAPKIR, NORTHERN MALATYA PROVINCE	38.47	38.47	39.03	39.03	SUBAERIAL			s AV8 [12011]	BASALT [12011]				MIOCENE [12011]	Collision	1.57447	0.211429	0.125806	8.74286	1.625	7.69231		VOLCANIC ROCK					WHOLE_ROCK [12011]	51.28	1.46		16.68				8.63	9.73	6.43	0.15		0.72	3.46	0.27
[10791]	INTRAPLATE VOLCANICS	ANATOLIA-IRAN BELT - CENOZOIC/QUATERNARY / ANATOLIA / EASTERN ANATOLIAN VOLCANIC BELT / MOUNT DUMLU / ARZUTU FORMATION	KARS PLATEAU	41.3	41.5	40	40.2	SUBAERIAL			s 2821 [10791]	BASALT [10791]			UPPER [10791]	CENOZOIC [10791]	Collision	0.851485	0.230357	0.125	17.0536	1.71429	7.81818		VOLCANIC ROCK					WHOLE_ROCK [10791]	50.6	2.08		17.86				9.63	8.18	5.99	0.16		0.84	3.85	0.21
[12011]	INTRAPLATE VOLCANICS	ANATOLIA-IRAN BELT - CENOZOIC/QUATERNARY / ANATOLIA / EASTERN ANATOLIAN VOLCANIC BELT / YAMADAG	ARAPKIR, NORTHERN MALATYA PROVINCE	38.47	38.47	39.03	39.03	SUBAERIAL			s AV13 [12011]	BASALT [12011]				MIOCENE [12011]	Collision	1.59091	0.293706	0.123333	12.0979	5.37037	7.56522		VOLCANIC ROCK					WHOLE_ROCK [12011]	49.63	1.11		15.87				8.78	8.82	8.4	0.15		0.86	3.29	0.18
[12404]	INTRAPLATE VOLCANICS	ANATOLIA-IRAN BELT - CENOZOIC/QUATERNARY / ANATOLIA / CENTRAL ANATOLIAN VOLCANIC BELT / HAMAMÖZÜ FORMATION		35.0487	35.0487	40.7217	40.7217	SUBAERIAL			s COM-49 [12404]	BASALT [12404]			MIDDLE [12404]	EOCENE [12404]	Collision	3.50877	0.335196	0.122727	34.1341	10.7111	6.05978		VOLCANIC ROCK					WHOLE_ROCK [12404]	51.9438	0.885406		15.3165				8.2	10.3094	7.02219	0.162833		2.4425	2.56462	0.24425
[12404]	INTRAPLATE VOLCANICS	ANATOLIA-IRAN BELT - CENOZOIC/QUATERNARY / ANATOLIA / CENTRAL ANATOLIAN VOLCANIC BELT / HAMAMÖZÜ FORMATION		34.8975	34.8975	41.0186	41.0186	SUBAERIAL			s COM-10 [12404]	ANDESITE, BASALTIC [12404]			MIDDLE [12404]	EOCENE [12404]	Collision	2.54237	0.252101	0.122222	33.4874	12.4423	8.77239		VOLCANIC ROCK					WHOLE_ROCK [12404]	56.8707	1.05939		16.4511				7.48	6.81471	2.97443	0.132423		2.72996	4.23755	0.417643
[23501]	INTRAPLATE VOLCANICS	ANATOLIA-IRAN BELT - CENOZOIC/QUATERNARY / TURKEY / EASTERN ANATOLIAN VOLCANIC BELT / TASLICAY INTRUSION		43	43	39.5	39.5	SAE			s_E208B [23501]	GABBRO [23501]			LOWER [23501]	MIOCENE [23501]	Collision	1.79167	0.160448	0.12069	13.9179	2.8125	10.6667	FINE-GRAINED [23501]	PLU					WR [23501]	50.11	0.86		17.88				8.46	10.39	5.47	0.17		1.36	3.25	0.2
[15179]	INTRAPLATE VOLCANICS	ANATOLIA-IRAN BELT - CENOZOIC/QUATERNARY / IRAN / KELBAJAR TROUGH		46	46	40.1	40.1	SAE			s_194/B [15179]	GABBRO [15179]				NEOGENE [15179]	Collision	2.53333	0.0883721	0.119048	15.1163	2.2	8.21429		PLU					WR [15179]	51.42	1.01		17.82		6.03	2.17		8.83	5.87	0.16		1.27	3.38	0.52
[20770]	INTRAPLATE VOLCANICS	CARPATHIAN BELT AND PANNONIAN BASIN / SOUTHERN PANNONIAN-EASTERN CARPATHIAN (TISZA-DACIA / RODNA -BARGAU NEOVOLCANIC ZONE	ROMANIA	24.8	25	47	47.2	SAE			s_FLN22 [20770]	GABBRO, AMPHIBOLE [20770]				MIOCENE [20770]	Collision	2.15789	0.262821	0.119048	23.0128	5.66667	7.89655		PLU					WR [20770]	51.6074	0.711067		17.8968				7.69	9.72459	7.02053	0.150225		1.29194	2.81422	0.240361
[11842]	INTRAPLATE VOLCANICS	CENTRAL ASIAN FOLDBELT - CENOZOIC/QUATERNARY / CHINA - CENOZOIC/QUATERNARY / TIBET / LINZIZONG VOLCANIC SUCCESSION - NIANBO FORMATION	DIKE, LINZHOU BASIN NEAR LHASA	91.171	91.171	29.9803	29.9803	SAE			s_BD-58 [11842]	DIABASE [11842]	45000000 [11842]	65000000 [11842]		PALEOGENE [11842]	Collision	3.77593	0.263768	0.119048	18.4348	7.82116		PORPHYRIC [11842]	PLU					WR [11842]	43.33	0.99		15.62			5.25	8.96	11.39	3.85	0.18		2.3	1.61	0.35
[15179]	INTRAPLATE VOLCANICS	ANATOLIA-IRAN BELT - CENOZOIC/QUATERNARY / LESSER CAUCASUS / KELBAJAR TROUGH		46	46	40.1	40.1	SUBAERIAL			s 194/B [15179]	GABBRO [15179]				NEOGENE [15179]	Collision	2.53333	0.0883721	0.119048	15.1163	2.2	8.21429		PLUTONIC ROCK					WHOLE_ROCK [15179]	51.42	1.01		17.82		6.03	2.17		8.83	5.87	0.16		1.27	3.38	0.52
[12404]	INTRAPLATE VOLCANICS	ANATOLIA-IRAN BELT - CENOZOIC/QUATERNARY / ANATOLIA / CENTRAL ANATOLIAN VOLCANIC BELT / HAMAMÖZÜ FORMATION		34.7031	34.7031	40.752	40.752	SUBAERIAL			s COM-76 [12404]	BASALT [12404]			MIDDLE [12404]	EOCENE [12404]	Collision	3.7799	0.359091	0.118519	21.0455	12.3051	6.58246	APHANITIC [12404]	VOLCANIC ROCK					WHOLE_ROCK [12404]	56.4574	0.724859		16.539				6.77	8.36141	4.57376	0.122511		2.52169	2.87902	0.296069
[18049]	INTRAPLATE VOLCANICS	ANATOLIA-IRAN BELT - CENOZOIC/QUATERNARY / ARMENIA / SHIRAK / SHIRAK VALLEY SERIES	BOTTOM FLOW OF TWO IN RIVER GORGE 3 KM SOUTH OF TASHIR IN LORI MARZ	44.3131	44.3131	41.0777	41.0777	SUBAERIAL			s S28.2 [18049]	TRACHYBASALT [18049]				CENOZOIC [18049]	Collision	0.624981	0.0974584	0.118326	12.9529	1.08473	8.07862		VOLCANIC ROCK					WHOLE_ROCK [18049]	50.3792	1.74175		16.7142		11.0201			9.19059	6.13164	0.171098		1.00114	4.05711	0.44862
[22350]	INTRAPLATE VOLCANICS	ANATOLIA-IRAN BELT - CENOZOIC/QUATERNARY / TURKEY / EASTERN ANATOLIAN VOLCANIC BELT / ELAZIG UNIT	PERTEK	39	39	39	39	SAE			s_15ELZ07 [22350]	GABBRO [22350]				CENOZOIC [22350]	Collision	2.19697	0.219697	0.116667	47.197	3.31959			PLU					WR [22350]	50.86	0.51		19.62				6.29	10.9	4.79	0.12		1.32	2.83	0.06
[16195]	INTRAPLATE VOLCANICS	ANATOLIA-IRAN BELT - CENOZOIC/QUATERNARY / ANATOLIA / EASTERN ANATOLIAN VOLCANIC BELT / ARARAT		44.4	44.4	39.75	39.75	SUBAERIAL			s MU 20.26 [16195]	BASALT [16195]				QUATERNARY [16195]	Collision	0.804598	0.10101	0.115903	14.8629	1.25	8		VOLCANIC ROCK					WHOLE_ROCK [16195]	49.64	1.67		16.09				8.85	9.14	6.93	0.16		1.06	4.51	0.42
[18049]	INTRAPLATE VOLCANICS	ANATOLIA-IRAN BELT - CENOZOIC/QUATERNARY / ARMENIA / SHIRAK / SHIRAK VALLEY SERIES	BOTTOM FLOW OF THREE IN RIVER GORGE AT GETAVAN VILLAGE	44.3395	44.3395	41.0549	41.0549	SUBAERIAL			s S29.1 [18049]	TRACHYBASALT [18049]				CENOZOIC [18049]	Collision	0.917813	0.127612	0.115399	15.2918	1.57335	8.274		VOLCANIC ROCK					WHOLE_ROCK [18049]	51.0347	1.55846		16.9135		10.5239			8.99959	5.74509	0.169131		1.18022	4.01256	0.401868
[18049]	INTRAPLATE VOLCANICS	ANATOLIA-IRAN BELT - CENOZOIC/QUATERNARY / ARMENIA / SHIRAK / SHIRAK VALLEY SERIES	TOP FLOW OF TWO IN RIVER GORGE 3 KM SOUTH OF TASHIR IN LORI MARZ	44.3091	44.3091	41.0802	41.0802	SUBAERIAL			s S28.1 [18049]	TRACHYBASALT [18049]				CENOZOIC [18049]	Collision	0.938552	0.108913	0.115179	14.1723	1.51059	8.38462		VOLCANIC ROCK					WHOLE_ROCK [18049]	51.451	1.50864		16.9202		10.1603			8.86745	5.82848	0.175919		1.19621	4.06085	0.441418
[19015]	INTRAPLATE VOLCANICS	ANATOLIA-IRAN BELT - CENOZOIC/QUATERNARY / ANATOLIA / CENTRAL ANATOLIAN VOLCANIC BELT / NIGDE	KECIBOYDURAN	34.3553	34.3553	38.1978	38.1978	SUBAERIAL	1415	1415	s K-61 [19015]	BASALT [19015]				QUATERNARY [19015]	Collision	0.750988	0.134752	0.115152	10.9929	1.12676	7.77778		VOLCANIC ROCK					WHOLE_ROCK [19015]	49	1.56		18	0.01			8.66	9.81	6.75	0.17		0.57	3.88	0.25
[18049]	INTRAPLATE VOLCANICS	ANATOLIA-IRAN BELT - CENOZOIC/QUATERNARY / ARMENIA / SHIRAK / SHIRAK VALLEY SERIES	POSSIBLE BASAL TO MIDDLE FLOW AT BOTTOM OF DZORAGED RIVER GORGE	44.1487	44.1487	41.0408	41.0408	SUBAERIAL			s S14.3 [18049]	BASALT [18049]				CENOZOIC [18049]	Collision	0.807525	0.0972549	0.114867	13.2375	1.18357	11.1967		VOLCANIC ROCK					WHOLE_ROCK [18049]	50.938	1.54572		16.6225		10.3527			9.03681	6.44933	0.161264		1.07257	3.97989	0.440663
[22350]	INTRAPLATE VOLCANICS	ANATOLIA-IRAN BELT - CENOZOIC/QUATERNARY / TURKEY / EASTERN ANATOLIAN VOLCANIC BELT / ELAZIG UNIT	NORTH OF ELAZIG	39	39	39	39	SAE			s_15ELZ10 [22350]	GABBRO [22350]				CENOZOIC [22350]	Collision	3.71257	0.496	0.114286	28.88	4.30864			PLU					WR [22350]	50.6	0.72		18.75				8.58	9.53	4.78	0.14		1.31	3.07	0.08
[18049]	INTRAPLATE VOLCANICS	ANATOLIA-IRAN BELT - CENOZOIC/QUATERNARY / ARMENIA / SHIRAK / SHIRAK VALLEY SERIES	POSSIBLE BASAL TO MIDDLE FLOW AT BOTTOM OF DZORAGED RIVER GORGE	44.1487	44.1487	41.0408	41.0408	SUBAERIAL			s S14.4 [18049]	BASALT [18049]				CENOZOIC [18049]	Collision	0.814992	0.0977523	0.114019	14.4866	1.16899	10.6791		VOLCANIC ROCK					WHOLE_ROCK [18049]	50.6796	1.51792		16.5884		10.1996			9.09059	6.60935	0.16009		1.08516	3.79365	0.431528
[15814]	INTRAPLATE VOLCANICS	ANATOLIA-IRAN BELT - CENOZOIC/QUATERNARY / ANATOLIA / CENTRAL ANATOLIAN VOLCANIC BELT / HASANDAG		34.0931	34.0931	38.1731	38.1731	SUBAERIAL			s H-80 [15814]	ANDESITE, BASALTIC [15814]				CENOZOIC [15814]	Collision	2.14458	0.315603	0.113772	20	6.26984			VOLCANIC ROCK					WHOLE_ROCK [15814]	53.33	1.01		16.65				10.17	8.7	3.88	0.16		1.04	2.7	0.2
[18654]	INTRAPLATE VOLCANICS	ANATOLIA-IRAN BELT - CENOZOIC/QUATERNARY / IRAN / MACRAN ARC / BAZMAN	NEAR DARAH AHO VILLAGE	59.7831	59.7831	27.7972	27.7972	SUBAERIAL			s 10-42 [18654]	BASALT [18654]				NEOGENE [18654]	Collision	1.1871	0.17037	0.112676	56.6667	2.20641	7.54864	PL-CPX-OL-PHYRIC, VITRIC MICROLITIC GROUNDMASS [18654]	VOLCANIC ROCK					WHOLE_ROCK [18654]	50.39	0.81		19.68				7.25	11.68	4.69	0.13		0.58	2.73	0.17
[18049]	INTRAPLATE VOLCANICS	ANATOLIA-IRAN BELT - CENOZOIC/QUATERNARY / ARMENIA / SHIRAK / SHIRAK VALLEY SERIES	POSSIBLE BASAL FLOW AT BOTTOM OF DZORAGED RIVER GORGE	44.135	44.135	41.0337	41.0337	SUBAERIAL			s S14.2 [18049]	BASALT [18049]				CENOZOIC [18049]	Collision	0.944134	0.10278	0.111766	13.6838	1.30274	10.6213		VOLCANIC ROCK					WHOLE_ROCK [18049]	51.2806	1.38865		16.7024		9.42326			9.4491	5.45652	0.137759		1.07557	3.8484	0.406295
[22730]	INTRAPLATE VOLCANICS	CENTRAL ASIAN FOLDBELT - CENOZOIC/QUATERNARY / CHINA - CENOZOIC/QUATERNARY / TIBET / GANGDESE BATHOLITH		94.441	94.441	29.441	29.441	SAE			s_T0878-3 [22730]	GABBRO [22730]				PALEOGENE [22730]	Collision	3.04762	0.171582	0.111524	32.681	14.4872	14.4574		PLU					WR [22730]	43.85	1.55		19.05		3.32	9.47		8.42	5.27	0.16		3.05	2.63	1.08		1.46
[18049]	INTRAPLATE VOLCANICS	ANATOLIA-IRAN BELT - CENOZOIC/QUATERNARY / ARMENIA / SHIRAK / SHIRAK VALLEY SERIES	MAFIC FLOW FROM GORGE ABOVE AGHVORIK VILLAGE OVERLYING OBSIDIAN	43.7674	43.7674	41.0799	41.0799	SUBAERIAL			s S25.2 [18049]	TRACHYBASALT [18049]				CENOZOIC [18049]	Collision	1.09462	0.110453	0.111158	13.9712	1.43034	8.32102		VOLCANIC ROCK					WHOLE_ROCK [18049]	53.0761	1.31636		16.8626		9.57772			8.86834	6.56933	0.151431		1.22035	3.95316	0.432705
[18049]	INTRAPLATE VOLCANICS	ANATOLIA-IRAN BELT - CENOZOIC/QUATERNARY / ARMENIA / SHIRAK / SHIRAK VALLEY SERIES	3RD FLOW UP IN GORGE SOUTH OF AMASIA	43.8614	43.8614	40.9119	40.9119	SUBAERIAL			s S26.2 [18049]	TRACHYBASALT [18049]				CENOZOIC [18049]	Collision	0.937553	0.129892	0.111124	13.5596	1.40816	8.66636		VOLCANIC ROCK					WHOLE_ROCK [18049]	52.2439	1.71333		16.9553		10.4339			8.3972	4.72413	0.159298		1.19099	4.34224	0.454589
[19015]	INTRAPLATE VOLCANICS	ANATOLIA-IRAN BELT - CENOZOIC/QUATERNARY / ANATOLIA / CENTRAL ANATOLIAN VOLCANIC BELT / NIGDE	KECIBOYDURAN	34.3931	34.3931	38.1886	38.1886	SUBAERIAL	1584	1584	s K-51 [19015]	BASALT [19015]				QUATERNARY [19015]	Collision	1.54982	0.14841	0.111111	12.9682	1.28788	8.30769		VOLCANIC ROCK					WHOLE_ROCK [19015]	50.9	1.29		16.4	0.04			7.92	9.38	7.22	0.16		1.11	3.64	0.38
[20030]	INTRAPLATE VOLCANICS	CENTRAL ASIAN FOLDBELT - CENOZOIC/QUATERNARY / CHINA - CENOZOIC/QUATERNARY / TIBET	XUNGBA-YADE AREA	82.1067	82.1067	31.8367	31.8367	SAE	4649	4649	s_XB1260 [20030]	GABBRO [20030]				CENOZOIC [20030]	Collision	5.94059	0.413793	0.111111	7.17241	20.5959	7.94479		PLU					WR [20030]	50.1	0.93		16.2				8.58	9.73	6.09	0.16		2.17	2.84	0.18
[18049]	INTRAPLATE VOLCANICS	ANATOLIA-IRAN BELT - CENOZOIC/QUATERNARY / ARMENIA / SHIRAK / SHIRAK VALLEY SERIES	POKR SEPASAR, SAMPLE FROM NEAR TOP ON SW FLANK	43.8043	43.8043	41.0451	41.0451	SUBAERIAL			s S2.2 [18049]	TRACHYBASALT [18049]				CENOZOIC [18049]	Collision	1.13871	0.110199	0.110525	13.3521	1.12946	11.1042		VOLCANIC ROCK					WHOLE_ROCK [18049]	52.6506	1.34675		16.8088		9.62274			8.58919	5.87984	0.157331		1.2086	4.12146	0.433699
[18049]	INTRAPLATE VOLCANICS	ANATOLIA-IRAN BELT - CENOZOIC/QUATERNARY / ARMENIA / SHIRAK / SHIRAK VALLEY SERIES	4TH FLOW UP IN GORGE SOUTH OF AMASIA	43.8614	43.8614	40.9119	40.9119	SUBAERIAL			s S26.3 [18049]	TRACHYBASALT [18049]				CENOZOIC [18049]	Collision	1.264	0.123635	0.110477	14.5473	1.33821	8.45998		VOLCANIC ROCK					WHOLE_ROCK [18049]	53.221	1.29463		16.977		9.19783			8.29069	4.34579	0.147458		1.48795	4.12059	0.508752
[18049]	INTRAPLATE VOLCANICS	ANATOLIA-IRAN BELT - CENOZOIC/QUATERNARY / ARMENIA / SHIRAK / SHIRAK VALLEY SERIES	LARGE DOLERITE FLOW (VALLEY-FILLING) AT PAGHAKN	43.6579	43.6579	41.0658	41.0658	SUBAERIAL			s S19.1 [18049]	TRACHYBASALT [18049]				CENOZOIC [18049]	Collision	1.14339	0.110764	0.109789	12.9491	1.00857	8.48029		VOLCANIC ROCK					WHOLE_ROCK [18049]	52.3328	1.39772		16.9633		9.27243			8.75472	5.97525	0.148481		1.18903	4.17889	0.440663
[18049]	INTRAPLATE VOLCANICS	ANATOLIA-IRAN BELT - CENOZOIC/QUATERNARY / ARMENIA / SHIRAK / SHIRAK VALLEY SERIES	POSSIBLE BASAL FLOW AT BOTTOM OF DZORAGED RIVER GORGE	44.1341	44.1341	41.0331	41.0331	SUBAERIAL			s S14.1 [18049]	TRACHYBASALT [18049]				CENOZOIC [18049]	Collision	1.00144	0.103843	0.109604	12.7925	1.38357	11.3237		VOLCANIC ROCK					WHOLE_ROCK [18049]	51.8495	1.3415		16.8279		9.43186			8.48871	6.37531	0.13536		1.14556	3.81691	0.40685
[10699]	INTRAPLATE VOLCANICS	ANATOLIA-IRAN BELT - CENOZOIC/QUATERNARY / ANATOLIA / EASTERN ANATOLIAN VOLCANIC BELT / HORASAN FORMATION	HORASAN AREA, ERZURUM-KARS PLATEAU	42.1728	42.1728	40.0458	40.0458	SUBAERIAL			s MK135 [10699]	BASALT [10699]				NEOGENE [10699]	Collision	0.583969	0.139091	0.107317	15.0909	1.42857	7		VOLCANIC ROCK					WHOLE_ROCK [10699]	50	1.79		17.27				9.86	7.96	6.29	0.17		0.69	3.96	0.26
[21988]	INTRAPLATE VOLCANICS	ANATOLIA-IRAN BELT - CENOZOIC/QUATERNARY / TURKEY / PONTIDES / SAMSUN GABBROS	SAMSUN REGION	37	37	41	41	SAE			s_MD-7 [21988]	GABBRO [21988]				CENOZOIC [21988]	Collision	0.20202	0.0253165	0.106667	25.5696	1	41.3636		PLU					WR [21988]	40.06	1.19		19.31	0			11.15	16.51	7	0.16		0.32	1.26	1.04
[10699][13304]	INTRAPLATE VOLCANICS	ANATOLIA-IRAN BELT - CENOZOIC/QUATERNARY / ANATOLIA / EASTERN ANATOLIAN VOLCANIC BELT / ALADAG / KARS PLATEAU FORMATION	NORTH OF KAGIZMAN, ERZURUM-KARS PLATEAU	43.1353	43.1353	40.1581	40.1581	SUBAERIAL			s MK175 [10699]	TRACHYANDESITE, BASALTIC [10699]	1500000 [13304]	11000000 [13304]		NEOGENE [10699]	Collision	1.50512	0.135276	0.106522	16.1963	1.47368	10.5625		VOLCANIC ROCK					WHOLE_ROCK [10699]	53.7	1.22		16.69		8.55			7.94	4.98	0.14		1.61	4.07	0.42
[18049]	INTRAPLATE VOLCANICS	ANATOLIA-IRAN BELT - CENOZOIC/QUATERNARY / ARMENIA / SHIRAK / SHIRAK VALLEY SERIES	FLOW DIRECTLY OVER THE TOP OF THE STEPANOVAN OPHIOLITE SEQUENCE S OF SEPASAR	43.8044	43.8044	41.019	41.019	SUBAERIAL			s S27.1 [18049]	TRACHYBASALT [18049]				CENOZOIC [18049]	Collision	1.50534	0.140363	0.106123	15.3596	1.56391	10.3584		VOLCANIC ROCK					WHOLE_ROCK [18049]	54.4074	1.2633		17.5735		8.85155			7.80787	3.7065	0.132688		1.50213	4.26711	0.460912
[18049]	INTRAPLATE VOLCANICS	ANATOLIA-IRAN BELT - CENOZOIC/QUATERNARY / ARMENIA / SHIRAK / SHIRAK VALLEY SERIES	MIDDLE FLOW HALF WAY UP THE CLIFFS OF THE DZORAGED RIVER GORGE. GPS TAKEN AT ROAD	44.9481	44.9481	41.0407	41.0407	SUBAERIAL			s S14.5 [18049]	TRACHYBASALT [18049]				CENOZOIC [18049]	Collision	1.42198	0.106216	0.105407	12.7607	1.44003	7.74166		VOLCANIC ROCK					WHOLE_ROCK [18049]	53.2084	1.25363		16.5886		9.02682			8.36782	5.93984	0.147498		1.47968	3.96108	0.481446
[15775]	INTRAPLATE VOLCANICS	ANATOLIA-IRAN BELT - CENOZOIC/QUATERNARY / ANATOLIA / EASTERN ANATOLIAN VOLCANIC BELT / NEMRUT / POST-CALDERA STAGE		42.2	42.2	38.67	38.67	SUBAERIAL			s N-010 [15775]	BASALT [15775]				QUATERNARY [15775]	Collision	0.83594	0.164347	0.104815	3.76915	1.45295			VOLCANIC ROCK					WHOLE_ROCK [15775]	47.692	2.593		15.724				12.11	8.967	6.205	0.194		0.879	3.799	0.389
[12404]	INTRAPLATE VOLCANICS	ANATOLIA-IRAN BELT - CENOZOIC/QUATERNARY / ANATOLIA / CENTRAL ANATOLIAN VOLCANIC BELT / HAMAMÖZÜ FORMATION		34.7443	34.7443	40.9772	40.9772	SUBAERIAL			s COM-18 [12404]	BASALT [12404]			MIDDLE [12404]	EOCENE [12404]	Collision	1.47929	0.19084	0.104545	39.0076	26.88	7.16475		VOLCANIC ROCK					WHOLE_ROCK [12404]	50.6182	0.858281		14.4988				9.16	10.1972	8.33759	0.183917		2.41136	2.39093	0.326964
[18049]	INTRAPLATE VOLCANICS	ANATOLIA-IRAN BELT - CENOZOIC/QUATERNARY / ARMENIA / SHIRAK / SHIRAK RIDGE SERIES	LEVONASAR, SCORIA/FLOW ABOUT 600M NORTH OF SUMMIT, BETWEEN LEVONASAR AND SEVKAPAR	43.9459	43.9459	41.0804	41.0804	SUBAERIAL			s S4.2 [18049]	ANDESITE, BASALTIC [18049]				CENOZOIC [18049]	Collision	2.0758	0.154345	0.104252	14.1215	2.89888			VOLCANIC ROCK					WHOLE_ROCK [18049]	57.6712	1.11053		17.2782		7.34964			6.53029	3.36286	0.118982		1.82807	4.15908	0.34318
[18049]	INTRAPLATE VOLCANICS	ANATOLIA-IRAN BELT - CENOZOIC/QUATERNARY / ARMENIA / SHIRAK / SHIRAK VALLEY SERIES	TOP OF CLIFF ABOVE THE ZORAGED RIVER GORGE BELOW THE KARACHAKH PASS	44.0831	44.0831	41.0367	41.0367	SUBAERIAL			s S10.1 [18049]	TRACHYBASALT [18049]				CENOZOIC [18049]	Collision	1.52347	0.119411	0.104106	14.4569	1.11938	10.9629		VOLCANIC ROCK					WHOLE_ROCK [18049]	54.071	1.10919		17.1081		8.53705			8.89973	5.80202	0.139463		1.1661	3.77338	0.395423
[10791]	INTRAPLATE VOLCANICS	ANATOLIA-IRAN BELT - CENOZOIC/QUATERNARY / ANATOLIA / EASTERN ANATOLIAN VOLCANIC BELT / MOUNT DUMLU / ARZUTU FORMATION	KARS PLATEAU	41.3	41.5	40	40.2	SUBAERIAL			s 3021 [10791]	ANDESITE, BASALTIC [10791]			UPPER [10791]	CENOZOIC [10791]	Collision	2.52361	0.263559	0.102778		2.38462	9.4		VOLCANIC ROCK					WHOLE_ROCK [10791]	54.5	1.18		16.92				7.38	8.14	4.88	0.12		1.48	3.56	0.28
[12761]	INTRAPLATE VOLCANICS	ANATOLIA-IRAN BELT - CENOZOIC/QUATERNARY / IRAN / URUMIEH-DOKHTAR ARC	SW QOM	50.348	50.348	34.268	34.268	SUBAERIAL			s Q05 [12761]	TRACHYTE [12761]				NEOGENE [12761]	Collision	3.02899	0.384191	0.102719	19.1789	6.52439	9.33333		VOLCANIC ROCK					WHOLE_ROCK [12761]	54.21	0.95		17.38		2.63	5.53		8.47	3.85	0.12		1.06	3.06	0.17
[10699][13304]	INTRAPLATE VOLCANICS	ANATOLIA-IRAN BELT - CENOZOIC/QUATERNARY / ANATOLIA / EASTERN ANATOLIAN VOLCANIC BELT / HORASAN FORMATION	HORASAN AREA, ERZURUM-KARS PLATEAU	42.1728	42.1728	40.0458	40.0458	SUBAERIAL			s MK130 [10699]	TRACHYANDESITE, BASALTIC [10699]	1500000 [13304]	11000000 [13304]		NEOGENE [10699]	Collision	0.82623	0.196875	0.102128	13.6719	2.14286	6.26923		VOLCANIC ROCK					WHOLE_ROCK [10699]	54.4	1.9		15.81				8.74	7.9	4.56	0.18		0.99	4.87	0.33
[15775]	INTRAPLATE VOLCANICS	ANATOLIA-IRAN BELT - CENOZOIC/QUATERNARY / ANATOLIA / EASTERN ANATOLIAN VOLCANIC BELT / NEMRUT / POST-CALDERA STAGE		42.2	42.2	38.67	38.67	SUBAERIAL			s N-264 [15775]	BASALT [15775]				QUATERNARY [15775]	Collision	0.771078	0.153587	0.101862	4.50543	1.33175			VOLCANIC ROCK					WHOLE_ROCK [15775]	46.9085	2.8126		15.9056				12.37	8.98078	6.27636	0.200731		0.8568	3.9453	0.394343
[22309]	INTRAPLATE VOLCANICS	CENTRAL ASIAN FOLDBELT - CENOZOIC/QUATERNARY / CHINA - CENOZOIC/QUATERNARY / TIBET	JIACHA, GANGDESE BELT	92.69	92.69	29.12	29.12	SAE	3260	3260	s_JC-12-9 [22309]	GABBRO [22309]				PALEOGENE [22309]	Collision	0.584337	0.136812	0.101695	21.4386	5.32278	6.97277		PLU					WR [22309]	48.9	1		17.3				8.1	10	7.7	0.1		1.3	2.9	0.2
[10791]	INTRAPLATE VOLCANICS	ANATOLIA-IRAN BELT - CENOZOIC/QUATERNARY / ANATOLIA / EASTERN ANATOLIAN VOLCANIC BELT / NEMRUT		42.2	42.2	38.67	38.67	SUBAERIAL			s 2362 [10791]	BASALT [10791]			UPPER [10791]	CENOZOIC [10791]	Collision	0.546053	0.115599	0.100671	8.70474	0.636364	10.4167		VOLCANIC ROCK					WHOLE_ROCK [10791]	47.7	3.08		16.66				12.69	9.48	6.46	0.2		0.68	3.54	0.37
[15775]	INTRAPLATE VOLCANICS	ANATOLIA-IRAN BELT - CENOZOIC/QUATERNARY / ANATOLIA / EASTERN ANATOLIAN VOLCANIC BELT / NEMRUT / POST-CALDERA STAGE		42.2	42.2	38.67	38.67	SUBAERIAL			s N-258 [15775]	BASALT [15775]				QUATERNARY [15775]	Collision	0.673444	0.130485	0.100575	5.08667	1.11456			VOLCANIC ROCK					WHOLE_ROCK [15775]	46.7499	2.84762		16.3582				12.65	9.12994	6.49493	0.204988		0.812389	3.7655	0.427316
[10804]	INTRAPLATE VOLCANICS	ANATOLIA-IRAN BELT - CENOZOIC/QUATERNARY / ANATOLIA / CENTRAL ANATOLIAN VOLCANIC BELT / GALATEAN VOLCANIC MASSIF		32.8	32.8	40.3	40.3	SUBAERIAL			s S6 [10804]	BASALT, ALKALINE [10804]			LOWER [10804]	MIOCENE [10804]	Collision	1.58333	0.120253	0.0991957	16.0759	1.17241	11.7368		VOLCANIC ROCK					WHOLE_ROCK [10804]	49.06	2.03		17.96				9.13	9.04	2.7	0.15		1.93	3.87	0.77
[8477]	INTRAPLATE VOLCANICS	ANATOLIA-IRAN BELT - CENOZOIC/QUATERNARY / ANATOLIA / WESTERN ANATOLIAN VOLCANIC BELT / BEHRAM ANDESITE	ASSOS, SOUTH BIGA PENINSULA	26.4	26.4	39.6	39.6	SUBAERIAL			s EA278 [8477]	TRACHYANDESITE [8477]			LOWER [8477]	MIOCENE [8477]	Collision	7.39209	0.517763	0.0976139	21.2648	10.5128	13.1038		VOLCANIC ROCK					WHOLE_ROCK [8477]	59.4	0.7		17.1				6.21	6.33	2.87	0.15		3.27	3.11	0.22
[16195]	INTRAPLATE VOLCANICS	ANATOLIA-IRAN BELT - CENOZOIC/QUATERNARY / ANATOLIA / EASTERN ANATOLIAN VOLCANIC BELT	SIAH-CHESHMEH	44.39	44.39	39.07	39.07	SUBAERIAL			s MU 13.18 [16195]	BASALT [16195]				QUATERNARY [16195]	Collision	3.12558	0.122561	0.097493	13.8793	0.391304	7.72222		VOLCANIC ROCK					WHOLE_ROCK [16195]	49.03	1.44		14.74				7.78	12.31	6.16	0.12		1.36	3.54	0.8
[18654]	INTRAPLATE VOLCANICS	ANATOLIA-IRAN BELT - CENOZOIC/QUATERNARY / IRAN / MACRAN ARC / BAZMAN	HIGHWAY FROM BAZMAN TO BAM	59.5867	59.5867	28.3206	28.3206	SUBAERIAL			s 10-50 [18654]	ANDESITE, BASALTIC [18654]				NEOGENE [18654]	Collision	1.03125	0.126923	0.0972763	9.53846	1.87817	9.05797	OL-CPX-PHYRIC, GLOMEROPORPHYRITIC, MICROLITIC TO VITRIC GROUNDMASS [18654]	VOLCANIC ROCK					WHOLE_ROCK [18654]	52.13	0.85		18.94				7.08	9.16	6.73	0.13		0.5	3.62	0.24
[16239]	INTRAPLATE VOLCANICS	ANATOLIA-IRAN BELT - CENOZOIC/QUATERNARY / ANATOLIA / EASTERN ANATOLIAN VOLCANIC BELT / KARACA(LI)DAG / SIVEREK PLATEAU BASALT		39.5249	39.5249	37.8201	37.8201	SUBAERIAL			s DS-39 [16239]	BASALT [16239]				NEOGENE [16239]	Collision	0.77381	0.110169	0.0971429	9.40678	0.408759	10.6923		VOLCANIC ROCK					WHOLE_ROCK [16239]	47.33	2.23		15.3	0.06			12.43	10.18	8.91	0.17		0.59	3.14	0.25
[10791]	INTRAPLATE VOLCANICS	ANATOLIA-IRAN BELT - CENOZOIC/QUATERNARY / ANATOLIA / EASTERN ANATOLIAN VOLCANIC BELT / ARARAT		44.4	44.4	39.75	39.75	SUBAERIAL			s 3132 [10791]	BASALT [10791]			UPPER [10791]	CENOZOIC [10791]	Collision	0.841463	0.109524	0.0969267	11.6931	1.08911	7.60714		VOLCANIC ROCK					WHOLE_ROCK [10791]	51.4	2.08		17.54				8.89	8.42	6.68	0.15		0.86	4.12	0.33
[20770]	INTRAPLATE VOLCANICS	CARPATHIAN BELT AND PANNONIAN BASIN / SOUTHERN PANNONIAN-EASTERN CARPATHIAN (TISZA-DACIA / RODNA -BARGAU NEOVOLCANIC ZONE	ROMANIA	24.8	25	47	47.2	SAE			s_FLN26 [20770]	GABBRO, AMPHIBOLE [20770]				MIOCENE [20770]	Collision	3.36842	0.294931	0.0964286	29.0783	9	10.8095		PLU					WR [20770]	55.4888	0.88141		17.7885				7.21	8.11298	4.21675	0.120192		2.01322	3.14503	0.220353
[8477][19738]	INTRAPLATE VOLCANICS	ANATOLIA-IRAN BELT - CENOZOIC/QUATERNARY / ANATOLIA / WESTERN ANATOLIAN VOLCANIC BELT / FOCA DIKE	FOCA	26.7567	26.7567	38.6706	38.6706	SUBAERIAL			s EA348 [8477]	ANDESITE, BASALTIC [8477] / NOT GIVEN [19738]			MIDDLE [8477]	MIOCENE [8477]	Collision	6.17259	0.380952	0.0962733	36.4693	8.44	9.67665		VOLCANIC ROCK					WHOLE_ROCK [8477]	54.4	0.73		15.36				6.62	8.25	9.06	0.12		1.89	2.78	0.24
[10699][13304]	INTRAPLATE VOLCANICS	ANATOLIA-IRAN BELT - CENOZOIC/QUATERNARY / ANATOLIA / EASTERN ANATOLIAN VOLCANIC BELT / KARGAPAZARI / KARAPINAR FORMATION	ERZURUM-KARS PLATEAU	41.5833	41.5833	40.1167	40.1167	SUBAERIAL			s MK281 [10699]	TRACHYANDESITE [10699]	1500000 [13304]	11000000 [13304]		NEOGENE [10699]	Collision	2.45318	0.265182	0.0953488	13.5628	3.71429	8.31818		VOLCANIC ROCK					WHOLE_ROCK [10699]	57	1.83		16.12				7.93	5.73	2.23	0.11		2	4.68	0.45
[8477]	INTRAPLATE VOLCANICS	ANATOLIA-IRAN BELT - CENOZOIC/QUATERNARY / ANATOLIA / WESTERN ANATOLIAN VOLCANIC BELT / NEBILER VOLCANICS	AYVALIK	26.6952	26.6952	39.3208	39.3208	SUBAERIAL			s EA143 [8477]	ANDESITE, BASALTIC [8477]			MIDDLE [8477]	MIOCENE [8477]	Collision	6.64455	0.403453	0.0948276	31.5309	8.67021	6.30566		VOLCANIC ROCK					WHOLE_ROCK [8477]	52.69	0.85		15.68				6.69	10.01	7.53	0.13		2.33	2.58	0.26
[21240]	INTRAPLATE VOLCANICS	ANATOLIA-IRAN BELT - CENOZOIC/QUATERNARY / ARMENIA / ZANGEZUR BLOCK / MEGHRI-ORDUBAD PLUTON		46.2215	46.2215	39.1027	39.1027	SAE			s_KJ1319 [21240]	GABBRO, HORNBLENDE [21240]				CENOZOIC [21240]	Collision	4.31506	0.23865	0.0944636	16.757	2.31765			PLU					WR [21240]	54.1638	0.7353		17.6671				7.5104	7.58154	3.70631	0.218603		1.20231	4.72977	0.36765
[15814]	INTRAPLATE VOLCANICS	ANATOLIA-IRAN BELT - CENOZOIC/QUATERNARY / ANATOLIA / CENTRAL ANATOLIAN VOLCANIC BELT / HASANDAG		34.1008	34.1008	38.0589	38.0589	SUBAERIAL			s H-26 [15814]	BASALT [15814]				CENOZOIC [15814]	Collision	2.96581	0.438685	0.0939086	1.93426	7.48077			VOLCANIC ROCK					WHOLE_ROCK [15814]	55.12	0.91		17.1				8.58	7.88	3.87	0.15		1.12	2.97	0.15
[8477]	INTRAPLATE VOLCANICS	ANATOLIA-IRAN BELT - CENOZOIC/QUATERNARY / ANATOLIA / WESTERN ANATOLIAN VOLCANIC BELT / NEBILER VOLCANICS	AYVALIK	26.6952	26.6952	39.3208	39.3208	SUBAERIAL			s EA300 [8477]	TRACHYBASALT [8477]			MIDDLE [8477]	MIOCENE [8477]	Collision	6.11558	0.391948	0.0935673	32.5926	6.17822	7.58893		VOLCANIC ROCK					WHOLE_ROCK [8477]	49.86	0.96		14.74				7.36	9.94	9.3	0.14		2.86	2.67	0.96
[15814]	INTRAPLATE VOLCANICS	ANATOLIA-IRAN BELT - CENOZOIC/QUATERNARY / ANATOLIA / CENTRAL ANATOLIAN VOLCANIC BELT / MOUNT ERCIYES		35.6375	35.6375	38.3233	38.3233	SUBAERIAL			s E-146 [15814]	BASALT [15814]				CENOZOIC [15814]	Collision	0.707547	0.11404	0.0933333	9.80233	1.25352			VOLCANIC ROCK					WHOLE_ROCK [15814]	47.96	1.77		17.05				11.2	8.56	6.28	0.19		0.77	3.93	0.4
[19015]	INTRAPLATE VOLCANICS	ANATOLIA-IRAN BELT - CENOZOIC/QUATERNARY / ANATOLIA / CENTRAL ANATOLIAN VOLCANIC BELT / NIGDE	KECIBOYDURAN	34.2839	34.2839	38.0594	38.0594	SUBAERIAL	1330	1330	s K114 [19015]	TRACHYBASALT [19015]				QUATERNARY [19015]	Collision	3.60215	0.223333	0.0933333	14.2	1.67742	9.72222		VOLCANIC ROCK					WHOLE_ROCK [19015]	51.9	1.32		18.4	0			7.35	8.47	4.74	0.13		1.39	4.02	0.44
[16034]	INTRAPLATE VOLCANICS	ANATOLIA-IRAN BELT - CENOZOIC/QUATERNARY / ANATOLIA / WESTERN ANATOLIAN VOLCANIC BELT	KARADIREK, SANDIKH	30.18	30.18	38.57	38.57	SUBAERIAL			s 05 KD 01 [16034]	LAMPROITE [16034]				NEOGENE [16034]	Collision	9.18949	0.778462	0.0932951	39.3784	4.85215	8.1258		VOLCANIC ROCK					WHOLE_ROCK [16034]	59.18	0.81		15.39				5.2	4.62	2.07	0.07		5.9	3.15	0.63
[10699]	INTRAPLATE VOLCANICS	ANATOLIA-IRAN BELT - CENOZOIC/QUATERNARY / ANATOLIA / EASTERN ANATOLIAN VOLCANIC BELT / KARGAPAZARI / KARAPINAR FORMATION	ERZURUM-KARS PLATEAU	41.5833	41.5833	40.1167	40.1167	SUBAERIAL			s MK280 [10699]	TRACHYANDESITE, BASALTIC [10699]				NEOGENE [10699]	Collision	2.35772	0.239669	0.0931818	13.719	3.42857	8.34783		VOLCANIC ROCK					WHOLE_ROCK [10699]	56.1	1.92		15.97				8.3	6.31	2.72	0.14		1.9	4.32	0.44
[8477]	INTRAPLATE VOLCANICS	ANATOLIA-IRAN BELT - CENOZOIC/QUATERNARY / ANATOLIA / WESTERN ANATOLIAN VOLCANIC BELT / NEBILER VOLCANICS	DIKILI	26.8922	26.8922	39.0731	39.0731	SUBAERIAL			s EA380 [8477]	BASALT [8477]			MIDDLE [8477]	MIOCENE [8477]	Collision	8.35795	0.347919	0.0927152	33.9806	5.68468	8.2674		VOLCANIC ROCK					WHOLE_ROCK [8477]	50.35	0.93		15.37				7.44	9.55	9.81	0.14		2.18	2.22	0.32
[18049]	INTRAPLATE VOLCANICS	ANATOLIA-IRAN BELT - CENOZOIC/QUATERNARY / ARMENIA / SHIRAK / SHIRAK RIDGE SERIES	LEVONASAR, SAMPLE FROM THE NORTH FLANK OF THE HILL	43.9384	43.9384	41.074	41.074	SUBAERIAL			s S3.2 [18049]	ANDESITE, BASALTIC [18049]				CENOZOIC [18049]	Collision	2.18621	0.176125	0.0922493	15.6336	2.75015			VOLCANIC ROCK					WHOLE_ROCK [18049]	58.2753	1.23893		17.4147		7.80857			6.32459	3.17598	0.118982		1.90636	4.3858	0.385953
[10699]	INTRAPLATE VOLCANICS	ANATOLIA-IRAN BELT - CENOZOIC/QUATERNARY / ANATOLIA / EASTERN ANATOLIAN VOLCANIC BELT / ALADAG / KARS PLATEAU FORMATION	NORTH OF KAGIZMAN, ERZURUM-KARS PLATEAU	43.1353	43.1353	40.1581	40.1581	SUBAERIAL			s MK162 [10699]	TRACHYANDESITE, BASALTIC [10699]				NEOGENE [10699]	Collision	2.39474	0.225248	0.0918919	16.2871	2.72727	8		VOLCANIC ROCK					WHOLE_ROCK [10699]	55.3	1.13		16.9		7.93			8.06	4.79	0.12		1.26	3.47	0.25
[15179]	INTRAPLATE VOLCANICS	ANATOLIA-IRAN BELT - CENOZOIC/QUATERNARY / LESSER CAUCASUS / KELBAJAR TROUGH		46	46	40.1	40.1	SUBAERIAL			s 105 [15179]	TRACHYBASALT [15179]				NEOGENE [15179]	Collision	1.08333	0.065	0.0913043	15	0.457143	11		VOLCANIC ROCK					WHOLE_ROCK [15179]	51.23	1.39		16.49		7.74	0.86		8.33	6.04	0.13		1.42	4.22	0.65
[18654]	INTRAPLATE VOLCANICS	ANATOLIA-IRAN BELT - CENOZOIC/QUATERNARY / IRAN / MACRAN ARC / BAZMAN	SOUTHERN BAZMAN REGION	60.2153	60.2153	27.8131	27.8131	SUBAERIAL			s 10-34 [18654]	ANDESITE, BASALTIC [18654]				NEOGENE [18654]	Collision	2.16949	0.246154	0.0912162	16.2179	4.10156	8.50242	PL-CPX-PHYRIC, GLOMEROPORPHYRITIC, VESICULAR MICROLITIC GROUNDMASS [18654]	VOLCANIC ROCK					WHOLE_ROCK [18654]	53.84	0.84		18.78				6.65	9.73	4.68	0.12		0.98	3.14	0.2
[16239]	INTRAPLATE VOLCANICS	ANATOLIA-IRAN BELT - CENOZOIC/QUATERNARY / ANATOLIA / EASTERN ANATOLIAN VOLCANIC BELT / KARACA(LI)DAG / SIVEREK PLATEAU BASALT		39.495	39.495	37.796	37.796	SUBAERIAL			s DS-40 [16239]	BASALT [16239]				NEOGENE [16239]	Collision	1.40127	0.160584	0.0909091	11.0219	1.19658	10.0435		VOLCANIC ROCK					WHOLE_ROCK [16239]	47.16	1.79		13.05	0.07			11.25	9.71	10.62	0.15		0.87	2.7	0.24
[16059]	INTRAPLATE VOLCANICS	ANATOLIA-IRAN BELT - CENOZOIC/QUATERNARY / ANATOLIA / WESTERN ANATOLIAN VOLCANIC BELT	CANDARLI	26.9	26.9	38.9	38.9	SUBAERIAL			s ZK-71 [16059]	TRACHYANDESITE, BASALTIC [16059]				MIOCENE [16059]	Collision	6.19	0.370326	0.0906433	32.0969	7.93381	6.6654		VOLCANIC ROCK					WHOLE_ROCK [16059]	52.9	0.77		14.2				6.71	8.87	9.64	0.12		1.85	2.64	0.23
[16059]	INTRAPLATE VOLCANICS	ANATOLIA-IRAN BELT - CENOZOIC/QUATERNARY / ANATOLIA / WESTERN ANATOLIAN VOLCANIC BELT	CANDARLI	26.9	26.9	38.9	38.9	SUBAERIAL			s ZK-D40 [16059]	TRACHYANDESITE, BASALTIC [16059]				MIOCENE [16059]	Collision	5.7449	0.33824	0.090379	35.386	7.13719	6.4417		VOLCANIC ROCK					WHOLE_ROCK [16059]	53.55	0.75		14.44				6.6	8.79	9.77	0.12		1.83	2.73	0.24
[15100]	INTRAPLATE VOLCANICS	ANATOLIA-IRAN BELT - CENOZOIC/QUATERNARY / ANATOLIA / EASTERN ANATOLIAN VOLCANIC BELT	ILICATEPE, ERZINCAN BASIN	39.5	39.5	39.6	39.6	SUBAERIAL			s IZ 184 [15100]	ANDESITE, BASALTIC [15100]				CENOZOIC [15100]	Collision	8.18681	0.396277	0.09	29.0426	7.75679	6.6	PORPHYRITIC [15100]	VOLCANIC ROCK					WHOLE_ROCK [15100]	54.16	0.8		13.45		2.54	4.52		7.4	10.33	0.11		2.01	2.47	0.2
[22730]	INTRAPLATE VOLCANICS	CENTRAL ASIAN FOLDBELT - CENOZOIC/QUATERNARY / CHINA - CENOZOIC/QUATERNARY / TIBET / GANGDESE BATHOLITH		94.434	94.434	29.446	29.446	SAE			s_T0580-D1-3 [22730]	GABBRO [22730]				PALEOGENE [22730]	Collision	15.1312	0.362937	0.0896309	2.85315	5.29319	9.34726		PLU					WR [22730]	44.2	1.51		14.36		5.99	8.64		10.35	8.13	0.24		1.74	2.22	0.57		0.9
[20101]	INTRAPLATE VOLCANICS	ANATOLIA-IRAN BELT - CENOZOIC/QUATERNARY / ANATOLIA / WESTERN ANATOLIAN VOLCANIC BELT / NALLIHAN VOLCANIC ASSOCIATION		30	30	40	40	SUBAERIAL			s NB-26 [20101]	BASALT [20101]				PALEOGENE [20101]	Collision	1.8018	0.121581	0.0894737	11.3374	0.363229	12.1818		VOLCANIC ROCK					WHOLE_ROCK [20101]	47.6	1.47		15.26				8.09	9.77	10.06	0.15		1.12	3.68	0.39
[18654]	INTRAPLATE VOLCANICS	ANATOLIA-IRAN BELT - CENOZOIC/QUATERNARY / IRAN / MACRAN ARC / BAZMAN	HIGHWAY FROM BAZMAN TO BAM	59.5867	59.5867	28.3206	28.3206	SUBAERIAL			s 10-49 [18654]	ANDESITE, BASALTIC [18654]				NEOGENE [18654]	Collision	1.50314	0.182443	0.0892193	15.8779	4.81833	12.1247	PL-CPX-PHYRIC, MICROLITIC TO VITRIC GROUNDMASS [18654]	VOLCANIC ROCK					WHOLE_ROCK [18654]	55.5	0.73		18.4				6.13	7.82	4.26	0.12		1.03	3.64	0.22
[11842]	INTRAPLATE VOLCANICS	CENTRAL ASIAN FOLDBELT - CENOZOIC/QUATERNARY / CHINA - CENOZOIC/QUATERNARY / TIBET / LINZIZONG VOLCANIC SUCCESSION - NIANBO FORMATION	DIKE, LINZHOU BASIN NEAR LHASA	91.1253	91.1253	29.9648	29.9648	SAE			s_LZ9912 [11842]	DIABASE [11842]	45000000 [11842]	65000000 [11842]		PALEOGENE [11842]	Collision	4.2684	0.202049	0.0890805	12.0082	2.9604		PORPHYRITIC [11842]	PLU					WR [11842]	44.68	0.99		16.37			4.15	8.73	12.06	3.44	0.14		1.39	2.4	0.47
[17167]	INTRAPLATE VOLCANICS	ANATOLIA-IRAN BELT - CENOZOIC/QUATERNARY / ANATOLIA / CENTRAL ANATOLIAN VOLCANIC BELT / MOUNT ERCIYES / NEW ERCIYES STAGE	BOZDAG AREA, ABOUT 14 KM DUE EAST OF THE SUMMIT	35.45	35.45	38.53	38.53	SUBAERIAL			s OU-034 [17167]	ANDESITE, BASALTIC [17167]		900000 [17167]		QUATERNARY [17167]	Collision	1.875	0.168103	0.0888889	12.931	1.69118	8.64286		VOLCANIC ROCK					WHOLE_ROCK [17167]	55.19	1.03		17.85				6.51	8.63	5.76	0.11		1.18	3.41	0.34
[15179]	INTRAPLATE VOLCANICS	ANATOLIA-IRAN BELT - CENOZOIC/QUATERNARY / LESSER CAUCASUS / KELBAJAR TROUGH		46	46	40.1	40.1	SUBAERIAL			s 120 [15179]	TRACHYANDESITE, BASALTIC [15179]				NEOGENE [15179]	Collision	2.8	0.107692	0.0886364	15.3846	2.89474	6.5		VOLCANIC ROCK					WHOLE_ROCK [15179]	55.67	1.08		17.13		6.59	0.43		6.24	4.66	0.12		2.6	4.22	0.58
[18049]	INTRAPLATE VOLCANICS	ANATOLIA-IRAN BELT - CENOZOIC/QUATERNARY / ARMENIA / SHIRAK / SHIRAK CONE SERIES	METZ SEPASAR, SE FLANK OF VOLCANIC CONE	43.8203	43.8203	41.0533	41.0533	SUBAERIAL			s S1.1 [18049]	TRACHYANDESITE, BASALTIC [18049]				CENOZOIC [18049]	Collision	2.2073	0.177523	0.0874425	15.2951	2.74969			VOLCANIC ROCK					WHOLE_ROCK [18049]	57.8844	1.22619		17.2273		7.76062			6.35104	3.05303	0.109148		1.98368	4.41748	0.386947
[18049]	INTRAPLATE VOLCANICS	ANATOLIA-IRAN BELT - CENOZOIC/QUATERNARY / ARMENIA / SHIRAK / SHIRAK CONE SERIES	METZ SEPASAR, NE FLANK OF VOLCANIC CONE	43.8216	43.8216	41.0534	41.0534	SUBAERIAL			s S1.2 [18049]	TRACHYANDESITE, BASALTIC [18049]				CENOZOIC [18049]	Collision	2.21213	0.18253	0.0873829	15.9875	2.8988			VOLCANIC ROCK					WHOLE_ROCK [18049]	57.8439	1.22913		17.1536		7.77627			6.30305	3.1091	0.116032		1.97878	4.40758	0.384958
[22730]	INTRAPLATE VOLCANICS	CENTRAL ASIAN FOLDBELT - CENOZOIC/QUATERNARY / CHINA - CENOZOIC/QUATERNARY / TIBET / GANGDESE BATHOLITH		94.441	94.441	29.441	29.441	SAE			s_T0878-4 [22730]	GABBRO [22730]				PALEOGENE [22730]	Collision	1.52381	0.165517	0.085758	16.6667	6.21746	6.94323		PLU					WR [22730]	44	1.29		18.16		3.49	9.36		10.44	6.01	0.2		1.43	2.58	0.68		0.5
[17167]	INTRAPLATE VOLCANICS	ANATOLIA-IRAN BELT - CENOZOIC/QUATERNARY / ANATOLIA / CENTRAL ANATOLIAN VOLCANIC BELT / MOUNT ERCIYES / NEW ERCIYES STAGE	BOZDAG AREA, ABOUT 14 KM DUE EAST OF THE SUMMIT	35.45	35.45	38.53	38.53	SUBAERIAL			s OU-0305A [17167]	ANDESITE, BASALTIC [17167]		900000 [17167]		QUATERNARY [17167]	Collision	2.29268	0.179389	0.0857143	12.4046	1.47436	9.84615		VOLCANIC ROCK					WHOLE_ROCK [17167]	54.62	1.09		17.89				6.75	8.63	5.95	0.11		1.16	3.4	0.39
[21988]	INTRAPLATE VOLCANICS	ANATOLIA-IRAN BELT - CENOZOIC/QUATERNARY / TURKEY / PONTIDES / SAMSUN GABBROS	SAMSUN REGION	37	37	41	41	SAE			s_MD-1 [21988]	GABBRO [21988]				CENOZOIC [21988]	Collision			0.0833333	47.4194	0.538462	14.3871		PLU					WR [21988]	40.12	1.22		19.09	0.002			12.67	15.78	7.42	0.13		0.23	1.18	0.07
[15179]	INTRAPLATE VOLCANICS	ANATOLIA-IRAN BELT - CENOZOIC/QUATERNARY / LESSER CAUCASUS / KELBAJAR TROUGH		46	46	40.1	40.1	SUBAERIAL			s 129 [15179]	TRACHYBASALT [15179]				NEOGENE [15179]	Collision	1.18519	0.0492308	0.0829787	16	0.857143	9.44444		VOLCANIC ROCK					WHOLE_ROCK [15179]	48.35	1.2		15.77		6.38	2.16		9.8	6.74	0.15		1.96	3.61	1.03
[19015]	INTRAPLATE VOLCANICS	ANATOLIA-IRAN BELT - CENOZOIC/QUATERNARY / ANATOLIA / CENTRAL ANATOLIAN VOLCANIC BELT / NIGDE	KECIBOYDURAN	34.2917	34.2917	38.0717	38.0717	SUBAERIAL	1463	1463	s K-81 [19015]	TRACHYBASALT [19015]				QUATERNARY [19015]	Collision	3.26087	0.19544	0.0828571	14.0717	1.4375	8.77778		VOLCANIC ROCK					WHOLE_ROCK [19015]	51.8	1.33		18.6	0			7.14	8.39	5.27	0.13		1.26	4.07	0.45
[15814]	INTRAPLATE VOLCANICS	ANATOLIA-IRAN BELT - CENOZOIC/QUATERNARY / ANATOLIA / CENTRAL ANATOLIAN VOLCANIC BELT / MOUNT ERCIYES		35.6361	35.6361	38.2933	38.2933	SUBAERIAL			s E-150 [15814]	BASALT [15814]				CENOZOIC [15814]	Collision	0.811847	0.118635	0.0825516	15.2495	1.16031			VOLCANIC ROCK					WHOLE_ROCK [15814]	47.76	1.74		16.85				11.02	8.55	6.52	0.19		0.77	3.92	0.42
[18654]	INTRAPLATE VOLCANICS	ANATOLIA-IRAN BELT - CENOZOIC/QUATERNARY / IRAN / MACRAN ARC / BAZMAN	NORTHERN BAZMAN REGION	60.1886	60.1886	28.1092	28.1092	SUBAERIAL			s 10-47 [18654]	ANDESITE, BASALTIC [18654]				NEOGENE [18654]	Collision	1.16763	0.12625	0.0821918	8.375	1.61329	9.01515	PL-CPX-HBL-PHYRIC, GLOMEROPORPHYRITIC, MICROLITIC GROUNDMASS [18654]	VOLCANIC ROCK					WHOLE_ROCK [18654]	52.52	0.9		17.44				6.74	8.47	6.07	0.13		0.84	3.9	0.28
[22730]	INTRAPLATE VOLCANICS	CENTRAL ASIAN FOLDBELT - CENOZOIC/QUATERNARY / CHINA - CENOZOIC/QUATERNARY / TIBET / GANGDESE BATHOLITH		94.434	94.434	29.446	29.446	SAE			s_T0580-D1-2 [22730]	GABBRO [22730]				PALEOGENE [22730]	Collision	12.7596	0.346774	0.0821429	3.78226	5.94728	9.68675		PLU					WR [22730]	43.24	1.53		13.43		6.9	8.96		10.3	8.81	0.26		1.89	1.84	0.61		1.28
[18049]	INTRAPLATE VOLCANICS	ANATOLIA-IRAN BELT - CENOZOIC/QUATERNARY / ARMENIA / SHIRAK / SHIRAK CONE SERIES	POKR SEPASAR, SMALL FLOW EMANATING E FROM MAIN CONE	43.8152	43.8152	41.0437	41.0437	SUBAERIAL			s S2.1 [18049]	TRACHYANDESITE, BASALTIC [18049]				CENOZOIC [18049]	Collision	2.37066	0.192569	0.0816729	16.1164	2.82454			VOLCANIC ROCK					WHOLE_ROCK [18049]	58.2659	1.22189		17.3884		7.8478			6.05537	2.86788	0.103134		1.99516	4.33446	0.384531
[15814]	INTRAPLATE VOLCANICS	ANATOLIA-IRAN BELT - CENOZOIC/QUATERNARY / ANATOLIA / CENTRAL ANATOLIAN VOLCANIC BELT / HASANDAG		34.1369	34.1369	38.2392	38.2392	SUBAERIAL			s H-49 [15814]	BASALT [15814]				CENOZOIC [15814]	Collision	2.15538	0.173843	0.0816327	12.3522	1.2663			VOLCANIC ROCK					WHOLE_ROCK [15814]	48.66	1.16		15.95				9.04	9.43	8.2	0.16		1.18	3.54	0.42
[22231]	INTRAPLATE VOLCANICS	ANATOLIA-IRAN BELT - CENOZOIC/QUATERNARY / TURKEY / WESTERN ANATOLIAN VOLCANIC BELT / KARACA諶EN GRANODIORITE		31.5	31.5	39.5	39.5	SAE			s_KGR-DIABASE DYKE [22231]	DIABASE [22231]				EOCENE [22231]	Collision	3.41969	0.362637	0.0815789	28.0769	5.1215	7.5		PLU					WR [22231]	51.87	0.81		15.28			6.03	6.03	7.71	5.97	0.13		1.84	4.18	0.18
[16239]	INTRAPLATE VOLCANICS	ANATOLIA-IRAN BELT - CENOZOIC/QUATERNARY / ANATOLIA / EASTERN ANATOLIAN VOLCANIC BELT / KARACA(LI)DAG / SIVEREK PLATEAU BASALT		39.3026	39.3026	37.8544	37.8544	SUBAERIAL			s DS-33 [16239]	BASALT [16239]				NEOGENE [16239]	Collision	2.12766	0.231214	0.0815789	16.5896	1.18243	9.53846		VOLCANIC ROCK					WHOLE_ROCK [16239]	49.63	1.91		15.13	0.04			10.75	9.67	6.14	0.16		0.93	2.96	0.21
[17167]	INTRAPLATE VOLCANICS	ANATOLIA-IRAN BELT - CENOZOIC/QUATERNARY / ANATOLIA / CENTRAL ANATOLIAN VOLCANIC BELT / MOUNT ERCIYES / NEW ERCIYES STAGE	BOZDAG AREA, ABOUT 14 KM DUE EAST OF THE SUMMIT	35.45	35.45	38.53	38.53	SUBAERIAL			s OU-0312A [17167]	ANDESITE, BASALTIC [17167]		900000 [17167]		QUATERNARY [17167]	Collision	2.19895	0.176471	0.0815789	12.563	1.67785	8.2		VOLCANIC ROCK					WHOLE_ROCK [17167]	54.4	1.09		17.51				6.63	9	6.1	0.11		1.42	3.34	0.4
[15814]	INTRAPLATE VOLCANICS	ANATOLIA-IRAN BELT - CENOZOIC/QUATERNARY / ANATOLIA / CENTRAL ANATOLIAN VOLCANIC BELT / MOUNT ERCIYES		35.6342	35.6342	38.3294	38.3294	SUBAERIAL			s E-148 [15814]	BASALT [15814]				CENOZOIC [15814]	Collision	1.04348	0.163358	0.0808271	12.6375	2.33929			VOLCANIC ROCK					WHOLE_ROCK [15814]	47.76	1.67		17.15				10.48	8.9	6.79	0.17		0.67	3.8	0.36
[8477]	INTRAPLATE VOLCANICS	ANATOLIA-IRAN BELT - CENOZOIC/QUATERNARY / ANATOLIA / WESTERN ANATOLIAN VOLCANIC BELT / NEBILER VOLCANICS	DIKILI	26.8922	26.8922	39.0731	39.0731	SUBAERIAL			s 94EA109 [8477]	TRACHYANDESITE, BASALTIC [8477]			MIDDLE [8477]	MIOCENE [8477]	Collision	6.34454	0.382085	0.0804348	32.9757	7.46094	10.7167		VOLCANIC ROCK					WHOLE_ROCK [8477]	51.51	1.05		17.63				7.38	8.36	5.32	0.15		2.8	3.23	0.49
[18052]	INTRAPLATE VOLCANICS	ANATOLIA-IRAN BELT - CENOZOIC/QUATERNARY / ANATOLIA / WESTERN ANATOLIAN VOLCANIC BELT / KULA VOLCANIC FIELD / ELEKCITEPE STAGE	NEAR KULA, MANISA PROVINCE, WESTERN ANATOLIA	28.5	28.5	38.5	38.5	SUBAERIAL			s 11KUL01-2 [18052]	BASANITE [18052]				QUATERNARY [18052]	Collision	4.27628	0.122909	0.080316	13.6957	0.556897	10.7538		VOLCANIC ROCK					WHOLE_ROCK [18052]	45.08	2.155		17.39	0.0044			8.88	9.75	5.58	0.16	0.0037	2.88	5	1.27
[15814]	INTRAPLATE VOLCANICS	ANATOLIA-IRAN BELT - CENOZOIC/QUATERNARY / ANATOLIA / CENTRAL ANATOLIAN VOLCANIC BELT / MOUNT ERCIYES		35.6281	35.6281	38.3022	38.3022	SUBAERIAL			s E-149 [15814]	BASALT [15814]				CENOZOIC [15814]	Collision	0.83557	0.119025	0.0801457	7.10803	1.37903			VOLCANIC ROCK					WHOLE_ROCK [15814]	47.96	1.73		16.75				10.71	8.75	6.78	0.18		0.73	3.79	0.39
[19015]	INTRAPLATE VOLCANICS	ANATOLIA-IRAN BELT - CENOZOIC/QUATERNARY / ANATOLIA / CENTRAL ANATOLIAN VOLCANIC BELT / NIGDE	KECIBOYDURAN	34.3556	34.3556	38.1781	38.1781	SUBAERIAL	1524	1524	s K-63 [19015]	TRACHYBASALT [19015]				QUATERNARY [19015]	Collision	1.79167	0.16996	0.0795455	13.004	1.3253	7.65		VOLCANIC ROCK					WHOLE_ROCK [19015]	50.2	1.6		16.9	0.02			7.79	8.34	7	0.15		1.38	4.17	0.5
[19015]	INTRAPLATE VOLCANICS	ANATOLIA-IRAN BELT - CENOZOIC/QUATERNARY / ANATOLIA / CENTRAL ANATOLIAN VOLCANIC BELT / NIGDE	KECIBOYDURAN	34.2942	34.2942	38.0856	38.0856	SUBAERIAL	1647	1647	s K-83 [19015]	BASALT [19015]				QUATERNARY [19015]	Collision	4.77011	0.265176	0.0794118	14.6326	2.82828	8.03846		VOLCANIC ROCK					WHOLE_ROCK [19015]	50.7	1.07		16.3	0.03			7.18	10.2	7.25	0.13		1.32	3.14	0.33
[10699][13304]	INTRAPLATE VOLCANICS	ANATOLIA-IRAN BELT - CENOZOIC/QUATERNARY / ANATOLIA / EASTERN ANATOLIAN VOLCANIC BELT / KARGAPAZARI FORMATION	PASINLER AREA, ERZURUM-KARS PLATEAU	41.6831	41.6831	39.9822	39.9822	SUBAERIAL			s MK101 [10699]	ANDESITE, BASALTIC [10699]	1500000 [13304]	11000000 [13304]		NEOGENE [10699]	Collision	4.45045	0.327152	0.0790698	15.7947	3.17647	8.82353		VOLCANIC ROCK					WHOLE_ROCK [10699]	57	0.91		16.83				5.89	7.6	4.56	0.11		2	3.48	0.27
[16239]	INTRAPLATE VOLCANICS	ANATOLIA-IRAN BELT - CENOZOIC/QUATERNARY / ANATOLIA / EASTERN ANATOLIAN VOLCANIC BELT / KARACA(LI)DAG / SIVEREK PLATEAU BASALT		39.5305	39.5305	37.7866	37.7866	SUBAERIAL			s DS-41 [16239]	BASALT [16239]				NEOGENE [16239]	Collision	1.30137	0.124183	0.0789474	8.49673	0.829787	11.1		VOLCANIC ROCK					WHOLE_ROCK [16239]	46.52	1.95		13.32	0.06			11.77	8.09	11.74	0.16		0.9	3.07	0.33
[16239]	INTRAPLATE VOLCANICS	ANATOLIA-IRAN BELT - CENOZOIC/QUATERNARY / ANATOLIA / EASTERN ANATOLIAN VOLCANIC BELT / KARACA(LI)DAG / SIVEREK PLATEAU BASALT		39.3215	39.3215	37.8144	37.8144	SUBAERIAL			s DS-34 [16239]	BASALT [16239]				NEOGENE [16239]	Collision	1.86813	0.223684	0.0787879	21.6447	1.11852			VOLCANIC ROCK					WHOLE_ROCK [16239]	49.54	1.73		14.62	0.06			10.94	9.03	7.9	0.16		0.83	2.86	0.2
[22730]	INTRAPLATE VOLCANICS	CENTRAL ASIAN FOLDBELT - CENOZOIC/QUATERNARY / CHINA - CENOZOIC/QUATERNARY / TIBET / GANGDESE BATHOLITH		94.434	94.434	29.446	29.446	SAE			s_T0580-D1-1 [22730]	GABBRO [22730]				PALEOGENE [22730]	Collision	15.0716	0.362759	0.0787781	2.78621	5.59633	9.71098		PLU					WR [22730]	43.69	1.57		14.26		6.13	8.71		10.2	8.29	0.24		1.89	2.17	0.56		0.84
[17167]	INTRAPLATE VOLCANICS	ANATOLIA-IRAN BELT - CENOZOIC/QUATERNARY / ANATOLIA / CENTRAL ANATOLIAN VOLCANIC BELT / MOUNT ERCIYES / NEW ERCIYES STAGE	BOZDAG AREA, ABOUT 14 KM DUE EAST OF THE SUMMIT	35.45	35.45	38.53	38.53	SUBAERIAL			s OU-0322-7 [17167]	ANDESITE, BASALTIC [17167]		900000 [17167]		QUATERNARY [17167]	Collision	1.93416	0.155629	0.0787234	13.5762	1.49425	6.88235		VOLCANIC ROCK					WHOLE_ROCK [17167]	55.01	1.23		17.81				7.04	8	5.14	0.12		1.38	3.86	0.41
[21988]	INTRAPLATE VOLCANICS	ANATOLIA-IRAN BELT - CENOZOIC/QUATERNARY / TURKEY / PONTIDES / SAMSUN GABBROS	SAMSUN REGION	37	37	41	41	SAE			s_MD-8 [21988]	GABBRO [21988]				CENOZOIC [21988]	Collision			0.0785714	50	1.11111	13.0857		PLU					WR [21988]	40.38	1.24		17.55	0			13.19	16.28	8.02	0.15		0.26	0.92	0.04
[14503]	INTRAPLATE VOLCANICS	ANATOLIA-IRAN BELT - CENOZOIC/QUATERNARY / ANATOLIA / EASTERN ANATOLIAN VOLCANIC BELT / KARACA(LI)DAG		39	40.5	37	38	SUBAERIAL	715	715	s 3MO 134 [14503]	BASALT [14503]	2600000 [14503]			CENOZOIC [14503]	Collision	1.31579	0.168919	0.0771429	12.973	0.882353		PORPHYRITIC [14503]	VOLCANIC ROCK					WHOLE_ROCK [14503]	51.5402	2.00587		15.6426				10.783	9.03405	6.6799	0.170476		0.755233	3.18028	0.208436
[11867]	INTRAPLATE VOLCANICS	ANATOLIA-IRAN BELT - CENOZOIC/QUATERNARY / ANATOLIA / WESTERN ANATOLIAN VOLCANIC BELT	BIGA PENINSULA	26	27	39.5	40	SUBAERIAL			s 11A [11867]	TRACHYANDESITE [11867]				CENOZOIC [11867]	Collision	12.6906	0.568273	0.0770833	28.1727	9.17742	7.88235		VOLCANIC ROCK					WHOLE_ROCK [11867]	58.62	0.69		15.8				6.06	5.96	3.33	0.1		3.32	3.09	0.25
[18052]	INTRAPLATE VOLCANICS	ANATOLIA-IRAN BELT - CENOZOIC/QUATERNARY / ANATOLIA / WESTERN ANATOLIAN VOLCANIC BELT / KULA VOLCANIC FIELD / ELEKCITEPE STAGE	NEAR KULA, MANISA PROVINCE, WESTERN ANATOLIA	28.5	28.5	38.5	38.5	SUBAERIAL			s 11KUL08 [18052]	BASANITE [18052]				QUATERNARY [18052]	Collision	4.15233	0.123041	0.0768405	14.1444	0.48315	15.2729		VOLCANIC ROCK					WHOLE_ROCK [18052]	44.91	2.194		18.27	0.001			8.67	9.33	4.72	0.16	0.0013	2.78	5.57	1.23
[12011]	INTRAPLATE VOLCANICS	ANATOLIA-IRAN BELT - CENOZOIC/QUATERNARY / ANATOLIA / EASTERN ANATOLIAN VOLCANIC BELT / YAMADAG	ARAPKIR, NORTHERN MALATYA PROVINCE	38.47	38.47	39.03	39.03	SUBAERIAL			s AV68 [12011]	TRACHYBASALT [12011]				MIOCENE [12011]	Collision	1.69291	0.166023	0.0765957	11.39	1.44928	10		VOLCANIC ROCK					WHOLE_ROCK [12011]	47.91	2.18		16.03				9.61	9.16	7.48	0.16		1.14	3.84	0.41
[18049]	INTRAPLATE VOLCANICS	ANATOLIA-IRAN BELT - CENOZOIC/QUATERNARY / ARMENIA / SHIRAK / SHIRAK RIDGE SERIES	LEVONASAR, SCORIA/FLOW ABOUT 600M NORTH OF SUMMIT, BETWEEN LEVONASAR AND SEVKAPAR	43.9459	43.9459	41.0804	41.0804	SUBAERIAL			s S4.1 [18049]	ANDESITE, BASALTIC [18049]				CENOZOIC [18049]	Collision	2.96123	0.201134	0.0761759	17.0739	3.60269			VOLCANIC ROCK					WHOLE_ROCK [18049]	59.7318	0.930012		16.9633		6.63205			6.19453	3.4383	0.102139		1.8962	4.07289	0.294076
[8477]	INTRAPLATE VOLCANICS	ANATOLIA-IRAN BELT - CENOZOIC/QUATERNARY / ANATOLIA / WESTERN ANATOLIAN VOLCANIC BELT / FOCA DIKE	FOCA	26.7567	26.7567	38.6706	38.6706	SUBAERIAL			s EA407 [8477]	TRACHYANDESITE, BASALTIC [8477]			MIDDLE [8477]	MIOCENE [8477]	Collision	8.21681	0.399871	0.0761099	19.8062	5.69942	8.37297		VOLCANIC ROCK					WHOLE_ROCK [8477]	56.64	1.03		17.16				6.69	8.83	2.04	0.08		2.76	3.37	0.32
[7998]	INTRAPLATE VOLCANICS	ANATOLIA-IRAN BELT - CENOZOIC/QUATERNARY / ANATOLIA / EASTERN ANATOLIAN VOLCANIC BELT	KIRIKHAN (HATAY), KARASU VALLEY	36.35	36.35	36.5	36.5	SUBAERIAL			s OP-53 [7998]	BASALT, OLIVINE [7998]				NEOGENE [7998]	Collision	2.66667	0.128617	0.075	16.9775	0.794118		MICROCRYSTALLINE MATRIX [7998]	VOLCANIC ROCK					WHOLE_ROCK [7998]	49.34	1.9		14.83	0.03			11.28	8.5	6.66	0.16	0.02	1.28	3.55	0.62
[15179]	INTRAPLATE VOLCANICS	ANATOLIA-IRAN BELT - CENOZOIC/QUATERNARY / LESSER CAUCASUS / KELBAJAR TROUGH		46	46	40.1	40.1	SUBAERIAL			s 57 [15179]	TRACHYBASALT [15179]				NEOGENE [15179]	Collision	2	0.0493506	0.073913	15.1948	0.642857	11		VOLCANIC ROCK					WHOLE_ROCK [15179]	49.42	1.44		16.27		7.16	0.72		9.1	5.27	0.12		2.48	3.22	1.04
[19015]	INTRAPLATE VOLCANICS	ANATOLIA-IRAN BELT - CENOZOIC/QUATERNARY / ANATOLIA / CENTRAL ANATOLIAN VOLCANIC BELT / NIGDE	KECIBOYDURAN	34.3436	34.3436	38.0022	38.0022	SUBAERIAL	1638	1638	s K-75 [19015]	BASALT [19015]				QUATERNARY [19015]	Collision	4.32161	0.193694	0.0738095	13.8964	2.43094	7.69565		VOLCANIC ROCK					WHOLE_ROCK [19015]	50	1.19		16.7	0.01			7.59	10.3	5.55	0.15		1.59	3.61	0.53
[16239]	INTRAPLATE VOLCANICS	ANATOLIA-IRAN BELT - CENOZOIC/QUATERNARY / ANATOLIA / EASTERN ANATOLIAN VOLCANIC BELT / KARACA(LI)DAG / SIVEREK PLATEAU BASALT		39.4186	39.4186	37.7699	37.7699	SUBAERIAL			s DS-37 [16239]	BASALT [16239]				NEOGENE [16239]	Collision	1.04972	0.139706	0.0735294	9.11765	0.946903	10.3704		VOLCANIC ROCK					WHOLE_ROCK [16239]	47.53	2.28		15.36	0.03			11.58	10.64	6.39	0.16		0.74	3.07	0.22
[18052]	INTRAPLATE VOLCANICS	ANATOLIA-IRAN BELT - CENOZOIC/QUATERNARY / ANATOLIA / WESTERN ANATOLIAN VOLCANIC BELT / KULA VOLCANIC FIELD / ELEKCITEPE STAGE	NEAR KULA, MANISA PROVINCE, WESTERN ANATOLIA	28.5	28.5	38.5	38.5	SUBAERIAL			s 11KUL02-4-1 [18052]	BASANITE [18052]				QUATERNARY [18052]	Collision	3.60959	0.118128	0.073514	15.4298	0.664594	9.81486		VOLCANIC ROCK					WHOLE_ROCK [18052]	45.4	2.188		16.84	0.0139			8.4	9.38	7.1	0.17	0.01	2.94	4.98	1.02
[10710][19738]	INTRAPLATE VOLCANICS	ANATOLIA-IRAN BELT - CENOZOIC/QUATERNARY / ANATOLIA / WESTERN ANATOLIAN VOLCANIC BELT / ELEKCITEPE	EAST OF SARACLAR	28.5	28.75	38.5	38.75	SUBAERIAL			s K-93-80 [10710]	BASANITE [10710]				QUATERNARY [10710]	Collision	4.3	0.118457	0.0731707	13.646	0.454858			VOLCANIC ROCK					WHOLE_ROCK [10710]	44.6	2.16		16.69				8.94	10.69	5.68	0.164		2.32	4.86	1.15
[15825]	INTRAPLATE VOLCANICS	ANATOLIA-IRAN BELT - CENOZOIC/QUATERNARY / ANATOLIA / EASTERN ANATOLIAN VOLCANIC BELT / KARACA(LI)DAG		39	40.5	37	38	SUBAERIAL	894	894	s 3MO 60 [15825]	BASALT [15825]	1000000 [15825]	1900000 [15825]		NEOGENE [15825]	Collision	1.31579	0.140449	0.072973	10	0.85		SUBOPHITIC WITH OL + PL PHENOCRYSTS [15825]	VOLCANIC ROCK					WHOLE_ROCK [15825]	50.56	2.42		16.32				9.8	9.26	5.6	0.2		1.01	3.38	0.36
[10791]	INTRAPLATE VOLCANICS	ANATOLIA-IRAN BELT - CENOZOIC/QUATERNARY / ANATOLIA / EASTERN ANATOLIAN VOLCANIC BELT	MUS DEPRESSION	41.5	41.5	38.75	38.75	SUBAERIAL			s 2112 [10791]	TRACHYBASALT [10791]			UPPER [10791]	CENOZOIC [10791]	Collision	0.9875	0.138112	0.0728793	6.29371	1.33333	9.73077		VOLCANIC ROCK					WHOLE_ROCK [10791]	50.1	2.86		15.56				11.34	8	4.6	0.2		1.32	3.92	0.49
[15814]	INTRAPLATE VOLCANICS	ANATOLIA-IRAN BELT - CENOZOIC/QUATERNARY / ANATOLIA / CENTRAL ANATOLIAN VOLCANIC BELT / HASANDAG		34.0736	34.0736	38.2169	38.2169	SUBAERIAL			s H-62 [15814]	BASALT [15814]				CENOZOIC [15814]	Collision	2.54726	0.179965	0.0728155	12.7206	1.20253			VOLCANIC ROCK					WHOLE_ROCK [15814]	48.26	1.19		16.55				8.94	11.3	7.88	0.15		0.95	3.34	0.35
[16239]	INTRAPLATE VOLCANICS	ANATOLIA-IRAN BELT - CENOZOIC/QUATERNARY / ANATOLIA / EASTERN ANATOLIAN VOLCANIC BELT / KARACA(LI)DAG / SIVEREK PLATEAU BASALT		39.381	39.381	37.7544	37.7544	SUBAERIAL			s DS-35 [16239]	BASALT [16239]				NEOGENE [16239]	Collision	0.769231	0.0990991	0.0724138	29.6396	0.664062	10.44		VOLCANIC ROCK					WHOLE_ROCK [16239]	46.44	2.18		14.27	0.06			11.68	9.63	9.93	0.16		0.67	2.81	0.22
[16239]	INTRAPLATE VOLCANICS	ANATOLIA-IRAN BELT - CENOZOIC/QUATERNARY / ANATOLIA / EASTERN ANATOLIAN VOLCANIC BELT / KARACA(LI)DAG / SIVEREK PLATEAU BASALT		39.3116	39.3116	37.7782	37.7782	SUBAERIAL			s DS-140 [16239]	BASALT [16239]				NEOGENE [16239]	Collision	1.92308	0.25	0.071875	14.5833	1.66055	9.58333		VOLCANIC ROCK					WHOLE_ROCK [16239]	49.08	1.79		13.85	0.06			11.7	8.47	9.09	0.16		0.89	2.64	0.22
[12761]	INTRAPLATE VOLCANICS	ANATOLIA-IRAN BELT - CENOZOIC/QUATERNARY / IRAN / URUMIEH-DOKHTAR ARC	SW NAIEN	52.716	52.716	32.705	32.705	SUBAERIAL			s Q21 [12761]	ANDESITE, BASALTIC [12761]				NEOGENE [12761]	Collision	1.84112	0.166808	0.0717131	37.5953	8.54153	10		VOLCANIC ROCK					WHOLE_ROCK [12761]	56.97	0.54		19.01		1.77	3.72		7.7	3.39	0.09		1.56	3.26	0.2
[14503]	INTRAPLATE VOLCANICS	ANATOLIA-IRAN BELT - CENOZOIC/QUATERNARY / ANATOLIA / EASTERN ANATOLIAN VOLCANIC BELT / KARACA(LI)DAG		39	40.5	37	38	SUBAERIAL	615	615	s 3MO 142 [14503]	BASALT [14503]	2600000 [14503]			CENOZOIC [14503]	Collision	1.625	0.173333	0.0714286	11.8667	1.15789		PORPHYRITIC [14503]	VOLCANIC ROCK					WHOLE_ROCK [14503]	48.5105	2.39678		13.6034				13.3717	9.52095	8.12685	0.1955		0.863955	3.0589	0.351529
[17167]	INTRAPLATE VOLCANICS	ANATOLIA-IRAN BELT - CENOZOIC/QUATERNARY / ANATOLIA / CENTRAL ANATOLIAN VOLCANIC BELT / MOUNT ERCIYES / NEW ERCIYES STAGE	BOZDAG AREA, ABOUT 14 KM DUE EAST OF THE SUMMIT	35.45	35.45	38.53	38.53	SUBAERIAL			s OU-0313A [17167]	ANDESITE, BASALTIC [17167]		900000 [17167]		QUATERNARY [17167]	Collision	2.13483	0.16309	0.0714286	12.4464	1.62791	7.3125		VOLCANIC ROCK					WHOLE_ROCK [17167]	55.81	1		17.74				6.46	8.47	5.38	0.1		1.04	3.68	0.31
[17167]	INTRAPLATE VOLCANICS	ANATOLIA-IRAN BELT - CENOZOIC/QUATERNARY / ANATOLIA / CENTRAL ANATOLIAN VOLCANIC BELT / MOUNT ERCIYES / NEW ERCIYES STAGE	BOZDAG AREA, ABOUT 14 KM DUE EAST OF THE SUMMIT	35.45	35.45	38.53	38.53	SUBAERIAL			s OU-0321B [17167]	ANDESITE, BASALTIC [17167]		900000 [17167]		QUATERNARY [17167]	Collision	2.48031	0.181034	0.0714286	14.4253	1.65	6.8125		VOLCANIC ROCK					WHOLE_ROCK [17167]	55.52	1.15		17.91				6.96	7.75	4.63	0.12		1.48	4.02	0.46
[17167]	INTRAPLATE VOLCANICS	ANATOLIA-IRAN BELT - CENOZOIC/QUATERNARY / ANATOLIA / CENTRAL ANATOLIAN VOLCANIC BELT / MOUNT ERCIYES / NEW ERCIYES STAGE	BOZDAG AREA, ABOUT 14 KM DUE EAST OF THE SUMMIT	35.45	35.45	38.53	38.53	SUBAERIAL			s OU-0322-8 [17167]	ANDESITE, BASALTIC [17167]		900000 [17167]		QUATERNARY [17167]	Collision	1.52174	0.121528	0.0714286	13.8194	1.45349	6.8125		VOLCANIC ROCK					WHOLE_ROCK [17167]	55.43	1.18		18.26				6.96	7.74	4.58	0.11		1.36	3.95	0.43
[16195]	INTRAPLATE VOLCANICS	ANATOLIA-IRAN BELT - CENOZOIC/QUATERNARY / ANATOLIA / EASTERN ANATOLIAN VOLCANIC BELT	SALMAS REGION	44.34	44.34	38.24	38.24	SUBAERIAL			s MU 15.20 [16195]	BASALT [16195]				QUATERNARY [16195]	Collision	5.95767	0.170322	0.0709046	12.0859	1.42424	7.61905		VOLCANIC ROCK					WHOLE_ROCK [16195]	48.11	1.32		13.74				8.09	9.64	11.46	0.14		2.01	3.4	0.76
[15814]	INTRAPLATE VOLCANICS	ANATOLIA-IRAN BELT - CENOZOIC/QUATERNARY / ANATOLIA / CENTRAL ANATOLIAN VOLCANIC BELT / HASANDAG		34.0675	34.0675	38.1292	38.1292	SUBAERIAL			s H-72 [15814]	BASALT [15814]				CENOZOIC [15814]	Collision	2.42654	0.184571	0.0703883	12.8623	1.38028			VOLCANIC ROCK					WHOLE_ROCK [15814]	47.96	1.26		17.4				9.49	11	6.19	0.16		0.96	3.57	0.36
[18654]	INTRAPLATE VOLCANICS	ANATOLIA-IRAN BELT - CENOZOIC/QUATERNARY / IRAN / MACRAN ARC / TAFTAN	RIVER BOULDER, TAFTAN REGION	60.9978	60.9978	28.5403	28.5403	SUBAERIAL			s 10-28 [18654]	ANDESITE, BASALTIC [18654]				NEOGENE [18654]	Collision	5.04762	0.332735	0.070122	13.3184	7.52358	6.27551	PL-CPX-PHYRIC, VITRIC GROUNDMASS [18654]	VOLCANIC ROCK					WHOLE_ROCK [18654]	56.07	0.77		16.01				5.79	7.72	4.91	0.11		1.7	3.31	0.23
[15814]	INTRAPLATE VOLCANICS	ANATOLIA-IRAN BELT - CENOZOIC/QUATERNARY / ANATOLIA / CENTRAL ANATOLIAN VOLCANIC BELT / MOUNT ERCIYES		35.6192	35.6192	38.3281	38.3281	SUBAERIAL			s E-152 [15814]	BASALT [15814]				CENOZOIC [15814]	Collision	1.06343	0.152979	0.0700855	14.5947	2.2377			VOLCANIC ROCK					WHOLE_ROCK [15814]	47.26	1.75		16.85				10.93	8.49	6.59	0.18		0.73	3.86	0.39
[16239]	INTRAPLATE VOLCANICS	ANATOLIA-IRAN BELT - CENOZOIC/QUATERNARY / ANATOLIA / EASTERN ANATOLIAN VOLCANIC BELT / KARACA(LI)DAG / SIVEREK PLATEAU BASALT		39.3237	39.3237	37.7238	37.7238	SUBAERIAL			s DS-137 [16239]	BASALT [16239]				NEOGENE [16239]	Collision	1.42045	0.183824	0.0694444	11.7647	1.22222	9.90909		VOLCANIC ROCK					WHOLE_ROCK [16239]	50.69	1.94		15.01	0.05			10.26	8.77	6.95	0.15		0.86	3.22	0.25
[10708]	INTRAPLATE VOLCANICS	ANATOLIA-IRAN BELT - CENOZOIC/QUATERNARY / ANATOLIA / WESTERN ANATOLIAN VOLCANIC BELT / KULA VOLCANIC FIELD		28	29	38.2	38.8	SUBAERIAL			s EA106 [10708]	BASALT, ALKALINE [10708]	130000 [10708]	1940000 [10708]		NEOGENE [10708]	Collision	2.78125	0.149868	0.0691824	11.9437	0.414226	10.2094		VOLCANIC ROCK					WHOLE_ROCK [10708]	47.29	2.06		16.06				7.62	10.51	7.79	0.14		1.75	4.78	0.84
[14297]	INTRAPLATE VOLCANICS	ANATOLIA-IRAN BELT - CENOZOIC/QUATERNARY / ANATOLIA / CENTRAL ANATOLIAN VOLCANIC BELT / TEPEKÖY		34.1	34.7	38	38.2	SUBAERIAL			s NU7 [14297]	ANDESITE, BASALTIC [14297]				NEOGENE [14297]	Collision	5	0.354839	0.06875	15.9355	4.33333	9.52632		VOLCANIC ROCK					WHOLE_ROCK [14297]	53.32	1		15.23				7.14	9.18	6.75	0.12		2.04	3.13	0.34
[15179]	INTRAPLATE VOLCANICS	ANATOLIA-IRAN BELT - CENOZOIC/QUATERNARY / LESSER CAUCASUS / KELBAJAR TROUGH		46	46	40.1	40.1	SUBAERIAL			s 180 [15179]	TRACHYANDESITE, BASALTIC [15179]				NEOGENE [15179]	Collision	3.40909	0.108696	0.0686275	12.1739	2.04762	8.5		VOLCANIC ROCK					WHOLE_ROCK [15179]	55.21	1.52		16.99		3.69	3.9		5.96	2.5	0.12		3.11	5.04	0.91
[15814]	INTRAPLATE VOLCANICS	ANATOLIA-IRAN BELT - CENOZOIC/QUATERNARY / ANATOLIA / CENTRAL ANATOLIAN VOLCANIC BELT / HASANDAG		34.1439	34.1439	38.2311	38.2311	SUBAERIAL			s H-42 [15814]	BASALT [15814]				CENOZOIC [15814]	Collision	3.80526	0.248368	0.0685579	14.7853	2.58046			VOLCANIC ROCK					WHOLE_ROCK [15814]	54.23	1.1		15.6				7.3	7.42	7.03	0.13		1.74	3.73	0.37
[10708]	INTRAPLATE VOLCANICS	ANATOLIA-IRAN BELT - CENOZOIC/QUATERNARY / ANATOLIA / WESTERN ANATOLIAN VOLCANIC BELT / KULA VOLCANIC FIELD		28	29	38.2	38.8	SUBAERIAL			s EA137 [10708]	BASALT, ALKALINE [10708]	130000 [10708]	1940000 [10708]		NEOGENE [10708]	Collision	2.74324	0.15225	0.0682303	12.1025	0.262443	12.6644		VOLCANIC ROCK					WHOLE_ROCK [10708]	47.47	2.06		15.92				8.2	10.85	7.79	0.14		1.82	4.64	0.82
[15814]	INTRAPLATE VOLCANICS	ANATOLIA-IRAN BELT - CENOZOIC/QUATERNARY / ANATOLIA / CENTRAL ANATOLIAN VOLCANIC BELT / HASANDAG		34.1422	34.1422	38.2294	38.2294	SUBAERIAL			s H-43 [15814]	BASALT [15814]				CENOZOIC [15814]	Collision	2.68599	0.180402	0.0679825	12.5698	1.4153			VOLCANIC ROCK					WHOLE_ROCK [15814]	48.36	1.2		16.55				8.86	9.97	7.56	0.15		1.18	3.47	0.57
[18052]	INTRAPLATE VOLCANICS	ANATOLIA-IRAN BELT - CENOZOIC/QUATERNARY / ANATOLIA / WESTERN ANATOLIAN VOLCANIC BELT / KULA VOLCANIC FIELD / ELEKCITEPE STAGE	NEAR KULA, MANISA PROVINCE, WESTERN ANATOLIA	28.5	28.5	38.5	38.5	SUBAERIAL			s 11KUL05 [18052]	BASANITE [18052]				QUATERNARY [18052]	Collision	3.49554	0.124973	0.0676296	15.2722	0.649803	9.90609		VOLCANIC ROCK					WHOLE_ROCK [18052]	45.43	2.197		16.94	0.0138			8.3	9.2	7.21	0.16	0.0104	3.13	4.94	0.93
[15179]	INTRAPLATE VOLCANICS	ANATOLIA-IRAN BELT - CENOZOIC/QUATERNARY / LESSER CAUCASUS / KELBAJAR TROUGH		46	46	40.1	40.1	SUBAERIAL			s 36/P [15179]	TRACHYANDESITE, BASALTIC [15179]				NEOGENE [15179]	Collision	3.06383	0.1	0.0673469	14.6389	1.68	26.3265		VOLCANIC ROCK					WHOLE_ROCK [15179]	54.9	0.92		17.6		7	0.3		7.1	3.9	0.13		3	4.6	0.78
[11867]	INTRAPLATE VOLCANICS	ANATOLIA-IRAN BELT - CENOZOIC/QUATERNARY / ANATOLIA / WESTERN ANATOLIAN VOLCANIC BELT	BIGA PENINSULA	26	27	39.5	40	SUBAERIAL			s 10A [11867]	ANDESITE, BASALTIC [11867]				CENOZOIC [11867]	Collision	5.95918	0.310638	0.0673077	28.9787	5.57241	11.75		VOLCANIC ROCK					WHOLE_ROCK [11867]	54.79	0.98		17.42				6.54	7.64	2.48	0.11		2.74	3.46	0.37
[10708]	INTRAPLATE VOLCANICS	ANATOLIA-IRAN BELT - CENOZOIC/QUATERNARY / ANATOLIA / WESTERN ANATOLIAN VOLCANIC BELT / KULA VOLCANIC FIELD		28	29	38.2	38.8	SUBAERIAL			s EA105 [10708]	BASALT, ALKALINE [10708]	130000 [10708]	1940000 [10708]		NEOGENE [10708]	Collision	2.93119	0.145492	0.0668058	10.9859	0.518569	11.4238		VOLCANIC ROCK					WHOLE_ROCK [10708]	47.14	1.93		16.1				7.85	10.78	7.21	0.13		1.91	4.44	0.81
[15179]	INTRAPLATE VOLCANICS	ANATOLIA-IRAN BELT - CENOZOIC/QUATERNARY / LESSER CAUCASUS / KELBAJAR TROUGH		46	46	40.1	40.1	SUBAERIAL			s 25 [15179]	TRACHYANDESITE [15179]				NEOGENE [15179]	Collision	3.31579	0.105	0.0666667	17.6667	3.76923	9.28571		VOLCANIC ROCK					WHOLE_ROCK [15179]	58.52	0.82		16.23		4.8	0.87		6.24	3.23	0.09		2.8	4	0.68
[16239]	INTRAPLATE VOLCANICS	ANATOLIA-IRAN BELT - CENOZOIC/QUATERNARY / ANATOLIA / EASTERN ANATOLIAN VOLCANIC BELT / KARACA(LI)DAG / SIVEREK PLATEAU BASALT		39.5863	39.5863	37.7183	37.7183	SUBAERIAL			s DS-43 [16239]	BASALT [16239]				NEOGENE [16239]	Collision	2.01342	0.138889	0.0666667	9.67593	0.475728	10.5455		VOLCANIC ROCK					WHOLE_ROCK [16239]	45.28	2.25		13.4	0.05			11.24	9.71	10.85	0.15		1.04	2.66	0.39
[15825]	INTRAPLATE VOLCANICS	ANATOLIA-IRAN BELT - CENOZOIC/QUATERNARY / ANATOLIA / EASTERN ANATOLIAN VOLCANIC BELT / KARACA(LI)DAG		39	40.5	37	38	SUBAERIAL	1067	1067	s 3MO 66 [15825]	BASALT [15825]	1000000 [15825]	1900000 [15825]		NEOGENE [15825]	Collision	1.26471	0.135079	0.0660377	9.1623	0.728111	9.40741	SUBOPHITIC WITH OL + PL PHENOCRYSTS [15825]	VOLCANIC ROCK					WHOLE_ROCK [15825]	51.66	2.44		16.11				9.64	9.19	5.23	0.19		0.99	3.27	0.22
[10708]	INTRAPLATE VOLCANICS	ANATOLIA-IRAN BELT - CENOZOIC/QUATERNARY / ANATOLIA / WESTERN ANATOLIAN VOLCANIC BELT / KULA VOLCANIC FIELD		28	29	38.2	38.8	SUBAERIAL			s EA121 [10708]	BASALT, ALKALINE [10708]	130000 [10708]	1940000 [10708]		NEOGENE [10708]	Collision	3.52846	0.142529	0.0658135	10.9672	0.323359	16.701		VOLCANIC ROCK					WHOLE_ROCK [10708]	45.65	2.03		17.47				8.22	9.34	6.47	0.15		2.23	5.83	1.09
[15814]	INTRAPLATE VOLCANICS	ANATOLIA-IRAN BELT - CENOZOIC/QUATERNARY / ANATOLIA / CENTRAL ANATOLIAN VOLCANIC BELT / MOUNT ERCIYES		35.6361	35.6361	38.2933	38.2933	SUBAERIAL			s E-233 [15814]	BASALT [15814]				CENOZOIC [15814]	Collision	1.10943	0.153766	0.0656566	15.8787	2.17213			VOLCANIC ROCK					WHOLE_ROCK [15814]	47.56	1.7		16.85				10.57	8.74	6.75	0.18		0.73	3.81	0.35
[15179]	INTRAPLATE VOLCANICS	ANATOLIA-IRAN BELT - CENOZOIC/QUATERNARY / LESSER CAUCASUS / KELBAJAR TROUGH		46	46	40.1	40.1	SUBAERIAL			s 208 [15179]	TRACHYBASALT [15179]				NEOGENE [15179]	Collision	3.52174	0.105195	0.0653846	15.1948	2.30435	7.5		VOLCANIC ROCK					WHOLE_ROCK [15179]	52.97	1.3		16.46		7.04	0.3		7	3.65	0.12		3.16	4.39	0.93
[10710][19738]	INTRAPLATE VOLCANICS	ANATOLIA-IRAN BELT - CENOZOIC/QUATERNARY / ANATOLIA / WESTERN ANATOLIAN VOLCANIC BELT / ELEKCITEPE	HIZIRILYAS TEPE	28.5	28.75	38.5	38.75	SUBAERIAL			s K-93-50 [10710]	BASANITE [10710]				QUATERNARY [10710]	Collision	4.08696	0.126856	0.0652174	12.6572	0.585313			VOLCANIC ROCK					WHOLE_ROCK [10710]	44.94	2.23		16.8				8.85	10.53	6.05	0.157		2.34	4.81	1.21
[16239]	INTRAPLATE VOLCANICS	ANATOLIA-IRAN BELT - CENOZOIC/QUATERNARY / ANATOLIA / EASTERN ANATOLIAN VOLCANIC BELT / KARACA(LI)DAG / SIVEREK PLATEAU BASALT		39.9899	39.9899	38.0493	38.0493	SUBAERIAL			s DS-45 [16239]	BASALT [16239]				NEOGENE [16239]	Collision	1.36054	0.104712	0.0651163	9.5288	0.46875	11.4286		VOLCANIC ROCK					WHOLE_ROCK [16239]	45.85	2.33		14.45	0.04			11.44	10.55	7.72	0.16		0.94	3.45	0.39
[15179]	INTRAPLATE VOLCANICS	ANATOLIA-IRAN BELT - CENOZOIC/QUATERNARY / LESSER CAUCASUS / KELBAJAR TROUGH		46	46	40.1	40.1	SUBAERIAL			s 13 [15179]	TRACHYANDESITE [15179]				NEOGENE [15179]	Collision	2	0.06	0.0645833	13.8333	3.05556	4		VOLCANIC ROCK					WHOLE_ROCK [15179]	57.66	0.79		16.41		4.09	1.87		6.25	3.18	0.05		3.01	3.85	0.57
[15179]	INTRAPLATE VOLCANICS	ANATOLIA-IRAN BELT - CENOZOIC/QUATERNARY / LESSER CAUCASUS / KELBAJAR TROUGH		46	46	40.1	40.1	SUBAERIAL			s 167 [15179]	TRACHYANDESITE, BASALTIC [15179]				NEOGENE [15179]	Collision	2.90909	0.0927536	0.0645833	13.0435	1.6087	17.1429		VOLCANIC ROCK					WHOLE_ROCK [15179]	54.31	1.18		16.82		5.02	2.17		6.66	3.84	0.12		2.96	4.78	0.75
[10708]	INTRAPLATE VOLCANICS	ANATOLIA-IRAN BELT - CENOZOIC/QUATERNARY / ANATOLIA / WESTERN ANATOLIAN VOLCANIC BELT / KULA VOLCANIC FIELD		28	29	38.2	38.8	SUBAERIAL			s EA133 [10708]	BASALT, ALKALINE [10708]	130000 [10708]	1940000 [10708]		NEOGENE [10708]	Collision	2.7032	0.159097	0.0643777	12.7896	0.48048	12.4786		VOLCANIC ROCK					WHOLE_ROCK [10708]	47.56	2.07		16.57				7.92	10.93	7.28	0.14		1.61	3.93	0.79
[16239]	INTRAPLATE VOLCANICS	ANATOLIA-IRAN BELT - CENOZOIC/QUATERNARY / ANATOLIA / EASTERN ANATOLIAN VOLCANIC BELT / KARACA(LI)DAG / SIVEREK PLATEAU BASALT		39.8735	39.8735	38.0979	38.0979	SUBAERIAL			s DS-47 [16239]	BASALT [16239]				NEOGENE [16239]	Collision	1.69811	0.140078	0.0640625	9.45525	0.705706	16.6667		VOLCANIC ROCK					WHOLE_ROCK [16239]	48.1	3.08		16.78	0			11.06	8.59	3.79	0.16		1.69	4.18	0.44
[10710]	INTRAPLATE VOLCANICS	ANATOLIA-IRAN BELT - CENOZOIC/QUATERNARY / ANATOLIA / WESTERN ANATOLIAN VOLCANIC BELT / KULA VOLCANIC FIELD / BURGAZ STAGE	BURUSUK MAH.	28.5	28.75	38.5	38.75	SUBAERIAL			s K-93-56 [10710]	BASANITE [10710]				QUATERNARY [10710]	Collision	3.04348	0.151515	0.0638298	16.6948	0.73659			VOLCANIC ROCK					WHOLE_ROCK [10710]	47.61	1.89		18.16				7.53	7.97	4.59	0.16		3.18	6.08	0.79
[10791]	INTRAPLATE VOLCANICS	ANATOLIA-IRAN BELT - CENOZOIC/QUATERNARY / ANATOLIA / EASTERN ANATOLIAN VOLCANIC BELT	MUS DEPRESSION	41.5	41.5	38.75	38.75	SUBAERIAL			s 2114 [10791]	TRACHYANDESITE [10791]			UPPER [10791]	CENOZOIC [10791]	Collision	1.51625	0.200429	0.0638112	6.39466	1.83871	8.31579		VOLCANIC ROCK					WHOLE_ROCK [10791]	52	3.33		16.3				10.35	7.68	1.88	0.21		2	4.36	0.83
[16239]	INTRAPLATE VOLCANICS	ANATOLIA-IRAN BELT - CENOZOIC/QUATERNARY / ANATOLIA / EASTERN ANATOLIAN VOLCANIC BELT / KARACA(LI)DAG / SIVEREK PLATEAU BASALT		39.3636	39.3636	38.0214	38.0214	SUBAERIAL			s DS-50 [16239]	BASALT [16239]				NEOGENE [16239]	Collision	2.10884	0.114815	0.0636364	9.07407	0.493056	12.3158		VOLCANIC ROCK					WHOLE_ROCK [16239]	44.71	2.5		13.7	0.05			12.5	8.96	9.63	0.16		1.21	3.31	0.5
[15179]	INTRAPLATE VOLCANICS	ANATOLIA-IRAN BELT - CENOZOIC/QUATERNARY / LESSER CAUCASUS / KELBAJAR TROUGH		46	46	40.1	40.1	SUBAERIAL			s 132 [15179]	TRACHYBASALT [15179]				NEOGENE [15179]	Collision	1.08333	0.0412698	0.0634615	16.1905	1.14286	10		VOLCANIC ROCK					WHOLE_ROCK [15179]	48.88	1.57		15.86		5.61	2.73		9.09	6.29	0.14		1.92	4	1.18
[8477][19738]	INTRAPLATE VOLCANICS	ANATOLIA-IRAN BELT - CENOZOIC/QUATERNARY / ANATOLIA / WESTERN ANATOLIAN VOLCANIC BELT / KOVACH DIKE SWARM	AYVACIK, SOUTH BIGA PENINSULA	26.4047	26.4047	39.6011	39.6011	SUBAERIAL			s EA418 [8477]	TRACHYANDESITE, BASALTIC [8477] / NOT GIVEN [19738]			LOWER [8477]	MIOCENE [8477]	Collision	9.39791	0.344199	0.0631579	26.0441	8.03529	8.58883		VOLCANIC ROCK					WHOLE_ROCK [8477]	56.24	0.87		18.45				5.76	7.9	3.83	0.09		1.84	3.87	0.29
[10708]	INTRAPLATE VOLCANICS	ANATOLIA-IRAN BELT - CENOZOIC/QUATERNARY / ANATOLIA / WESTERN ANATOLIAN VOLCANIC BELT / KULA VOLCANIC FIELD		28	29	38.2	38.8	SUBAERIAL			s EA111 [10708]	BASALT, ALKALINE [10708]	130000 [10708]	1940000 [10708]		NEOGENE [10708]	Collision	3.16216	0.146923	0.0630975	11.216	0.302511	18.4021		VOLCANIC ROCK					WHOLE_ROCK [10708]	46.63	2.06		17.74				8.29	9.88	6.9	0.15		1.93	4.89	0.95
[15814]	INTRAPLATE VOLCANICS	ANATOLIA-IRAN BELT - CENOZOIC/QUATERNARY / ANATOLIA / CENTRAL ANATOLIAN VOLCANIC BELT / MOUNT ERCIYES		35.4642	35.4642	38.4056	38.4056	SUBAERIAL			s E-175 [15814]	ANDESITE, BASALTIC [15814]				CENOZOIC [15814]	Collision	3.54011	0.259201	0.0627706	12.6468	1.6135			VOLCANIC ROCK					WHOLE_ROCK [15814]	53.03	0.96		17.1				6.9	8.17	6.14	0.12		1.14	3.52	0.36
[15814]	INTRAPLATE VOLCANICS	ANATOLIA-IRAN BELT - CENOZOIC/QUATERNARY / ANATOLIA / CENTRAL ANATOLIAN VOLCANIC BELT / HASANDAG		34.0572	34.0572	38.2439	38.2439	SUBAERIAL			s H-64 [15814]	BASALT [15814]				CENOZOIC [15814]	Collision	2.87562	0.196732	0.0627615	13.179	1.4902			VOLCANIC ROCK					WHOLE_ROCK [15814]	49.05	1.36		16.1				9.22	9.21	6.58	0.16		1.48	3.86	0.48
[8477]	INTRAPLATE VOLCANICS	ANATOLIA-IRAN BELT - CENOZOIC/QUATERNARY / ANATOLIA / WESTERN ANATOLIAN VOLCANIC BELT / NEBILER VOLCANICS	DIKILI	26.8922	26.8922	39.0731	39.0731	SUBAERIAL			s EA296 [8477]	TRACHYANDESITE [8477]			MIDDLE [8477]	MIOCENE [8477]	Collision	15.7926	0.773415	0.062724	27.2647	6.03093	9.61589		VOLCANIC ROCK					WHOLE_ROCK [8477]	57.2	0.8		17.56				5.42	7.13	4.16	0.06		2.96	3.47	0.3
[15179]	INTRAPLATE VOLCANICS	ANATOLIA-IRAN BELT - CENOZOIC/QUATERNARY / LESSER CAUCASUS / KELBAJAR TROUGH		46	46	40.1	40.1	SUBAERIAL			s 53 [15179]	TRACHYANDESITE, BASALTIC [15179]				NEOGENE [15179]	Collision	3.33333	0.101695	0.0625	16.6102	0.809524	20		VOLCANIC ROCK					WHOLE_ROCK [15179]	53.32	0.97		17.39		6.11	0.57		7.17	3.81	0.1		2.8	5.03	0.82
[10708]	INTRAPLATE VOLCANICS	ANATOLIA-IRAN BELT - CENOZOIC/QUATERNARY / ANATOLIA / WESTERN ANATOLIAN VOLCANIC BELT / KULA VOLCANIC FIELD		28	29	38.2	38.8	SUBAERIAL			s EA119 [10708]	BASALT, ALKALINE [10708]	130000 [10708]	1940000 [10708]		NEOGENE [10708]	Collision	3.34404	0.14911	0.061144	11.2518	0.538745	13.3282		VOLCANIC ROCK					WHOLE_ROCK [10708]	46.14	2.02		17.3				7.67	9.04	7.2	0.15		2.01	5.2	0.95
[10708]	INTRAPLATE VOLCANICS	ANATOLIA-IRAN BELT - CENOZOIC/QUATERNARY / ANATOLIA / WESTERN ANATOLIAN VOLCANIC BELT / KULA VOLCANIC FIELD		28	29	38.2	38.8	SUBAERIAL			s EA127 [10708]	BASALT, ALKALINE [10708]	130000 [10708]	1940000 [10708]		NEOGENE [10708]	Collision	3.11399	0.1692	0.0610998	13.1053	0.702614	14.0172		VOLCANIC ROCK					WHOLE_ROCK [10708]	47.59	1.96		16.98				7.62	9.69	7.03	0.14		1.87	3.98	0.65
[10699]	INTRAPLATE VOLCANICS	ANATOLIA-IRAN BELT - CENOZOIC/QUATERNARY / ANATOLIA / EASTERN ANATOLIAN VOLCANIC BELT / MOUNT DUMLU / GÜNGÖRMEZ FORMATION	ERZURUM-KARS PLATEAU	41.3644	41.3644	40.0608	40.0608	SUBAERIAL			s MK237 [10699]	ANDESITE, BASALTIC [10699]				NEOGENE [10699]	Collision	4.30323	0.221595	0.0609756	16.4452	1.66667	7.33333		VOLCANIC ROCK					WHOLE_ROCK [10699]	56.5	0.99		18.43				5.97	7.33	4.16	0.1		1.35	3.91	0.3
[15179]	INTRAPLATE VOLCANICS	ANATOLIA-IRAN BELT - CENOZOIC/QUATERNARY / LESSER CAUCASUS / KELBAJAR TROUGH		46	46	40.1	40.1	SUBAERIAL			s 134 [15179]	TRACHYBASALT [15179]				NEOGENE [15179]	Collision	2.22727	0.0790323	0.0607843	15.9677	0.971429	10		VOLCANIC ROCK					WHOLE_ROCK [15179]	48.05	1.045		15.53		3.55	4.46		9.19	6.81	0.13		1.73	4.18	1.13
[14503][15825]	INTRAPLATE VOLCANICS	ANATOLIA-IRAN BELT - CENOZOIC/QUATERNARY / ANATOLIA / EASTERN ANATOLIAN VOLCANIC BELT / KARACA(LI)DAG		39	40.5	37	38	SUBAERIAL	1061	1061	s 3MO 47 [14503]	BASALT [14503]	2600000 [14503] / 2700000 [15825]	11000000 [15825]		CENOZOIC [14503] / NEOGENE [15825]	Collision	1.02339	0.123239	0.0602094	10.3521	0.579235	10.2692	PORPHYRITIC [14503] / SUBOPHITIC WITH OL + PL PHENOCRYSTS [15825]	VOLCANIC ROCK					WHOLE_ROCK [14503]	48.2759	2.579		16.259				12.3102	10.4025	6.02191	0.224753		0.823966	2.85709	0.245662
[15179]	INTRAPLATE VOLCANICS	ANATOLIA-IRAN BELT - CENOZOIC/QUATERNARY / LESSER CAUCASUS / KELBAJAR TROUGH		46	46	40.1	40.1	SUBAERIAL			s 87 [15179]	TRACHYANDESITE, BASALTIC [15179]				NEOGENE [15179]	Collision	1.90476	0.0606061	0.0595745	15.1515	1.71429	10		VOLCANIC ROCK					WHOLE_ROCK [15179]	53.05	1.14		17.46		5.66	1.65		6.71	4.12	0.13		2.77	4.27	0.83
[8477]	INTRAPLATE VOLCANICS	ANATOLIA-IRAN BELT - CENOZOIC/QUATERNARY / ANATOLIA / WESTERN ANATOLIAN VOLCANIC BELT / KOVACLI DIKE	BABAKALE	26.0936	26.0936	39.4752	39.4752	SUBAERIAL			s EA45 [8477]	TRACHYANDESITE [8477]			LOWER [8477]	MIOCENE [8477]	Collision	13.3776	0.435983	0.0573013	21.7725	10.4369	6.75243		VOLCANIC ROCK					WHOLE_ROCK [8477]	57.73	0.73		16.71				5.16	6.78	3.75	0.09		3.07	3.43	0.25
[14503]	INTRAPLATE VOLCANICS	ANATOLIA-IRAN BELT - CENOZOIC/QUATERNARY / ANATOLIA / EASTERN ANATOLIAN VOLCANIC BELT / KARACA(LI)DAG		39	40.5	37	38	SUBAERIAL	783	783	s 3MO 103 [14503]	BASALT [14503]	2600000 [14503]			CENOZOIC [14503]	Collision	1.57143	0.117021	0.0571429	13.7234	0.461538		PORPHYRITIC [14503]	VOLCANIC ROCK					WHOLE_ROCK [14503]	46.9209	2.25836		12.4876				12.7737	9.61925	11.7543	0.247623		0.908631	2.67232	0.357296
[16239]	INTRAPLATE VOLCANICS	ANATOLIA-IRAN BELT - CENOZOIC/QUATERNARY / ANATOLIA / EASTERN ANATOLIAN VOLCANIC BELT / KARACA(LI)DAG / SIVEREK PLATEAU BASALT		39.3094	39.3094	37.95	37.95	SUBAERIAL			s DS-51 [16239]	BASALT [16239]				NEOGENE [16239]	Collision	1.89744	0.114907	0.0571429	12.0807	0.628141	12.0625		VOLCANIC ROCK					WHOLE_ROCK [16239]	48.71	2.32		16.66	0			9.93	8.43	4.46	0.16		2.07	4.01	0.54
[16239]	INTRAPLATE VOLCANICS	ANATOLIA-IRAN BELT - CENOZOIC/QUATERNARY / ANATOLIA / EASTERN ANATOLIAN VOLCANIC BELT / KARACA(LI)DAG / SIVEREK PLATEAU BASALT		40.061	40.061	38.1432	38.1432	SUBAERIAL			s DS-46 [16239]	BASALT [16239]				NEOGENE [16239]	Collision	2.02614	0.120155	0.0568627	6.74419	0.640127	11.7222		VOLCANIC ROCK					WHOLE_ROCK [16239]	48.78	2.1		14.45	0.04			12.32	7.86	9.19	0.17		1.41	3.93	0.43
[15179]	INTRAPLATE VOLCANICS	ANATOLIA-IRAN BELT - CENOZOIC/QUATERNARY / LESSER CAUCASUS / KELBAJAR TROUGH		46	46	40.1	40.1	SUBAERIAL			s 19/P [15179]	TRACHYBASALT [15179]				NEOGENE [15179]	Collision	2.42553	0.077551	0.0568421	17.2381	2.15	6.62069		VOLCANIC ROCK					WHOLE_ROCK [15179]	50.5	1.18		17.7		7	0.8		9.2	5.3	0.15		2.9	4.5	0.89
[14503][15825]	INTRAPLATE VOLCANICS	ANATOLIA-IRAN BELT - CENOZOIC/QUATERNARY / ANATOLIA / EASTERN ANATOLIAN VOLCANIC BELT / KARACA(LI)DAG		39	40.5	37	38	SUBAERIAL	719	719	s 3MO 130 [14503]	BASALT [14503]	2600000 [14503] / 2700000 [15825]	11000000 [15825]		CENOZOIC [14503] / NEOGENE [15825]	Collision	1.49133	0.151765	0.0566038	9.23529	0.733945	9.08	PORPHYRITIC [14503] / SUBOPHITIC WITH OL + PL PHENOCRYSTS [15825]	VOLCANIC ROCK					WHOLE_ROCK [14503]	49.4355	1.9886		13.9443				12.7716	9.23876	8.42554	0.189719		0.747672	3.04708	0.211236
[8477]	INTRAPLATE VOLCANICS	ANATOLIA-IRAN BELT - CENOZOIC/QUATERNARY / ANATOLIA / WESTERN ANATOLIAN VOLCANIC BELT / BAKACAK VOLCANIC UNIT	EZINE, SOUTH BIGA PENINSULA	26.3325	26.3325	39.79	39.79	SUBAERIAL			s EA67 [8477]	TRACHYANDESITE [8477]			LOWER [8477]	MIOCENE [8477]	Collision	24.5849	0.561698	0.0560272	16.3347	11.9308	10.1543		VOLCANIC ROCK					WHOLE_ROCK [8477]	59.96	0.75		16.38				5.3	5.42	2.33	0.06		4.77	3.22	0.4
[15179]	INTRAPLATE VOLCANICS	ANATOLIA-IRAN BELT - CENOZOIC/QUATERNARY / LESSER CAUCASUS / KELBAJAR TROUGH		46	46	40.1	40.1	SUBAERIAL			s 185 [15179]	TRACHYANDESITE [15179]				NEOGENE [15179]	Collision	3.07692	0.0833333	0.055814	19.375	3.2	11		VOLCANIC ROCK					WHOLE_ROCK [15179]	57.85	0.75		17.7		3.79	1.88		6.12	2.77	0.13		2.89	4.53	0.44
[16239]	INTRAPLATE VOLCANICS	ANATOLIA-IRAN BELT - CENOZOIC/QUATERNARY / ANATOLIA / EASTERN ANATOLIAN VOLCANIC BELT / KARACA(LI)DAG / SIVEREK PLATEAU BASALT		39.3205	39.3205	37.8539	37.8539	SUBAERIAL			s DS-143 [16239]	BASALT [16239]				NEOGENE [16239]	Collision	1.49701	0.177305	0.0555556	13.2624	0.361607	9.36		VOLCANIC ROCK					WHOLE_ROCK [16239]	48.95	2.02		15.2	0.05			11.53	8.93	6.93	0.16		0.8	3.19	0.22
[16064]	INTRAPLATE VOLCANICS	ANATOLIA-IRAN BELT - CENOZOIC/QUATERNARY / IRAN / LUT BLOCK	LUT-SISTAN REGION	57.3408	57.3408	32.9525	32.9525	SUBAERIAL			s 08-06 [16064]	BASALT, ALKALINE [16064]			UPPER [16064]	NEOGENE [16064]	Collision	1.28571	0.132558	0.0552326	16.7442	1.30531	2.58134		VOLCANIC ROCK			FRESH		WHOLE_ROCK [16064]	54.46	1.83		15.52				8.9	6.63	4.95	0.12		0.84	4.32	0.32
[15100]	INTRAPLATE VOLCANICS	ANATOLIA-IRAN BELT - CENOZOIC/QUATERNARY / ANATOLIA / WESTERN ANATOLIAN VOLCANIC BELT	KARABURUN PENINSULA	26.4506	26.4506	38.67	38.67	SUBAERIAL			s K83 [15100]	ANDESITE, BASALTIC [15100]				CENOZOIC [15100]	Collision	7.98883	0.386486	0.0551876	44.8378	8.30431	6.53846	PORPHYRITIC [15100]	VOLCANIC ROCK					WHOLE_ROCK [15100]	53.53	0.92		14.06		3.74	3.41		8.12	8.96	0.13		2.52	2.6	0.39
[15825]	INTRAPLATE VOLCANICS	ANATOLIA-IRAN BELT - CENOZOIC/QUATERNARY / ANATOLIA / EASTERN ANATOLIAN VOLCANIC BELT / KARACA(LI)DAG		39	40.5	37	38	SUBAERIAL	746	746	s 3MO 128 [15825]	BASALT [15825]	1000000 [15825]	1900000 [15825]		NEOGENE [15825]	Collision	1.8	0.113924	0.055	8.35443	0.5		OL-PHYRIC LAVAS [15825]	VOLCANIC ROCK					WHOLE_ROCK [15825]	48.74	2.2		14.54				11.02	8.72	8.22	0.19		1.15	3.59	0.4
[15814]	INTRAPLATE VOLCANICS	ANATOLIA-IRAN BELT - CENOZOIC/QUATERNARY / ANATOLIA / CENTRAL ANATOLIAN VOLCANIC BELT / HASANDAG		34.0439	34.0439	38.1264	38.1264	SUBAERIAL			s H-70 [15814]	BASALT [15814]				CENOZOIC [15814]	Collision	2.20225	0.186756	0.054878	11.4435	2.07965			VOLCANIC ROCK					WHOLE_ROCK [15814]	52.34	0.88		17.25				6.64	7.4	4.73	0.13		1.27	4.17	0.32
[8477]	INTRAPLATE VOLCANICS	ANATOLIA-IRAN BELT - CENOZOIC/QUATERNARY / ANATOLIA / WESTERN ANATOLIAN VOLCANIC BELT / NEBILER VOLCANICS	AYVALIK	26.6952	26.6952	39.3208	39.3208	SUBAERIAL			s EA292 [8477]	TRACHYANDESITE, BASALTIC [8477]			MIDDLE [8477]	MIOCENE [8477]	Collision	13.3545	0.585376	0.0544	30.5639	4.67164	8.00521		VOLCANIC ROCK					WHOLE_ROCK [8477]	55.58	0.89		16.89				5.92	7.61	4.64	0.12		3.13	3.17	0.39
[15825]	INTRAPLATE VOLCANICS	ANATOLIA-IRAN BELT - CENOZOIC/QUATERNARY / ANATOLIA / EASTERN ANATOLIAN VOLCANIC BELT / KARACA(LI)DAG		39	40.5	37	38	SUBAERIAL	1918	1918	s 3MO 22 [15825]	BASALT [15825]	1000000 [15825]	1900000 [15825]		NEOGENE [15825]	Collision	1.21429	0.085	0.0542857	9.3	0.310345		OL-PHYRIC LAVAS [15825]	VOLCANIC ROCK					WHOLE_ROCK [15825]	48.18	2.45		14.97				10.91	9.34	7.87	0.15		1.01	3.51	0.38
[16064]	INTRAPLATE VOLCANICS	ANATOLIA-IRAN BELT - CENOZOIC/QUATERNARY / IRAN / LUT BLOCK	LUT-SISTAN REGION	61.4869	61.4869	31.0322	31.0322	SUBAERIAL			s 08-07 [16064]	BASALT, ALKALINE [16064]			UPPER [16064]	NEOGENE [16064]	Collision	1.26087	0.126087	0.0542857	23.3333	1.31276	2.5974		VOLCANIC ROCK			FRESH		WHOLE_ROCK [16064]	54.8	1.86		15.67				8.91	6.77	4.81	0.14		1.12	4.28	0.34
[10791]	INTRAPLATE VOLCANICS	ANATOLIA-IRAN BELT - CENOZOIC/QUATERNARY / ANATOLIA / EASTERN ANATOLIAN VOLCANIC BELT / KARACA(LI)DAG	FROM 20 KM SW OF SIVEREK TO NORTHERN MARGIN OF THE VOLCANIC COMPLEX AT DIYARBAKIR	39.83	39.83	37.67	37.67	SUBAERIAL			s 1912 [10791]	BASALT [10791]			UPPER [10791]	CENOZOIC [10791]	Collision	1.23077	0.10982	0.0541761	7.23337	0.521739	9.82143		VOLCANIC ROCK					WHOLE_ROCK [10791]	50.2	2.62		15.1				11.68	8.88	7.66	0.16		1	3.28	0.26
[16239]	INTRAPLATE VOLCANICS	ANATOLIA-IRAN BELT - CENOZOIC/QUATERNARY / ANATOLIA / EASTERN ANATOLIAN VOLCANIC BELT / KARACA(LI)DAG / SIVEREK PLATEAU BASALT		39.2985	39.2985	37.8137	37.8137	SUBAERIAL			s DS-142 [16239]	BASALT [16239]				NEOGENE [16239]	Collision	1.49254	0.144928	0.0540541	10.6522	0.786982	11.4545		VOLCANIC ROCK					WHOLE_ROCK [16239]	45.82	2.24		13.23	0.06			11.99	9	10.95	0.16		0.9	2.8	0.24
[15179]	INTRAPLATE VOLCANICS	ANATOLIA-IRAN BELT - CENOZOIC/QUATERNARY / LESSER CAUCASUS / KELBAJAR TROUGH		46	46	40.1	40.1	SUBAERIAL			s 174 [15179]	TRACHYANDESITE, BASALTIC [15179]				NEOGENE [15179]	Collision	3.25	0.08125	0.054	11.25	1.22857	9.375		VOLCANIC ROCK					WHOLE_ROCK [15179]	54.01	1.5		17.49		5.79	2.46		6.8	3.37	0.12		3.25	4.53	0.94
[15179]	INTRAPLATE VOLCANICS	ANATOLIA-IRAN BELT - CENOZOIC/QUATERNARY / LESSER CAUCASUS / KELBAJAR TROUGH		46	46	40.1	40.1	SUBAERIAL			s 143 [15179]	TRACHYANDESITE [15179]				NEOGENE [15179]	Collision	1.81818	0.0677966	0.0531915	15.2542	1.90476	7.77778		VOLCANIC ROCK					WHOLE_ROCK [15179]	57.08	1.24		17.25		4.62	3.09		6.09	2.29	0.11		2.87	4.53	0.68
[16239]	INTRAPLATE VOLCANICS	ANATOLIA-IRAN BELT - CENOZOIC/QUATERNARY / ANATOLIA / EASTERN ANATOLIAN VOLCANIC BELT / KARACA(LI)DAG / SIVEREK PLATEAU BASALT		39.2603	39.2603	37.6786	37.6786	SUBAERIAL			s DS-128 [16239]	BASALT [16239]				NEOGENE [16239]	Collision	2.72727	0.225352	0.0529412	12.8169	0.487097	10.7692		VOLCANIC ROCK					WHOLE_ROCK [16239]	44.84	2.13		16.28	0.02			11.27	11.46	6.2	0.16		1.14	2.72	0.38
[12761]	INTRAPLATE VOLCANICS	ANATOLIA-IRAN BELT - CENOZOIC/QUATERNARY / IRAN / URUMIEH-DOKHTAR ARC	N BAFT	56.589	56.589	29.547	29.547	SUBAERIAL			s B14 [12761]	ANDESITE, BASALTIC [12761]				NEOGENE [12761]	Collision	13.5949	0.348588	0.0524194	18.6952	3.88858	10.8462		VOLCANIC ROCK					WHOLE_ROCK [12761]	56.4	0.79		17.05		1.83	3.83		7.65	3.49	0.11		2.16	4.26	0.4
[15179]	INTRAPLATE VOLCANICS	ANATOLIA-IRAN BELT - CENOZOIC/QUATERNARY / LESSER CAUCASUS / KELBAJAR TROUGH		46	46	40.1	40.1	SUBAERIAL			s 160 [15179]	TRACHYANDESITE [15179]				NEOGENE [15179]	Collision	1.90476	0.0597015	0.0510638	15.1642	2.43478	14		VOLCANIC ROCK					WHOLE_ROCK [15179]	59.28	1.24		16.55		4.95	1.3		5.82	2.79	0.1		3.46	4.65	0.76
[16034]	INTRAPLATE VOLCANICS	ANATOLIA-IRAN BELT - CENOZOIC/QUATERNARY / ANATOLIA / WESTERN ANATOLIAN VOLCANIC BELT	KARADIREK, SANDIKH	30.18	30.18	38.57	38.57	SUBAERIAL			s 05 KD 03 [16034]	LAMPROITE [16034]				NEOGENE [16034]	Collision	6.26866	0.318584	0.0507866	54.3564	7.08129	5.93312		VOLCANIC ROCK					WHOLE_ROCK [16034]	53.69	1.18		13.4				7.21	8.43	5.59	0.1		5.04	2.15	0.83
[10791]	INTRAPLATE VOLCANICS	ANATOLIA-IRAN BELT - CENOZOIC/QUATERNARY / ANATOLIA / EASTERN ANATOLIAN VOLCANIC BELT / KARACA(LI)DAG	FROM 20 KM SW OF SIVEREK TO NORTHERN MARGIN OF THE VOLCANIC COMPLEX AT DIYARBAKIR	39.83	39.83	37.67	37.67	SUBAERIAL			s 1913 [10791]	BASALT [10791]			UPPER [10791]	CENOZOIC [10791]	Collision	1.81301	0.126777	0.0506608	7.61796	0.833333	10.125		VOLCANIC ROCK					WHOLE_ROCK [10791]	48.8	2.39		14.4				12.15	8.2	9.92	0.16		0.9	2.52	0.26
[14503]	INTRAPLATE VOLCANICS	ANATOLIA-IRAN BELT - CENOZOIC/QUATERNARY / ANATOLIA / EASTERN ANATOLIAN VOLCANIC BELT / KARACA(LI)DAG		39	40.5	37	38	SUBAERIAL	826	826	s 3MO 59 [14503]	BASALT [14503]	2600000 [14503]			CENOZOIC [14503]	Collision	1.44444	0.115044	0.05	7.16814	0.551724		PORPHYRITIC [14503]	VOLCANIC ROCK					WHOLE_ROCK [14503]	48.3964	2.99197		16.5208				11.0874	9.96418	5.78746	0.220517		1.25957	3.49141	0.280319
[14503]	INTRAPLATE VOLCANICS	ANATOLIA-IRAN BELT - CENOZOIC/QUATERNARY / ANATOLIA / EASTERN ANATOLIAN VOLCANIC BELT / KARACA(LI)DAG		39	40.5	37	38	SUBAERIAL	562	562	s 3MO 114 [14503]	BASALT [14503]	2600000 [14503]			CENOZOIC [14503]	Collision	1.30769	0.0949721	0.05	12.2346	0.392857		PORPHYRITIC [14503]	VOLCANIC ROCK					WHOLE_ROCK [14503]	46.6084	2.70583		12.5637				12.4096	10.1626	11.4086	0.17985		0.949709	2.65781	0.353967
[7998]	INTRAPLATE VOLCANICS	ANATOLIA-IRAN BELT - CENOZOIC/QUATERNARY / ANATOLIA / EASTERN ANATOLIAN VOLCANIC BELT	KIRIKHAN (HATAY), KARASU VALLEY	36.35	36.35	36.5	36.5	SUBAERIAL			s OP-45 [7998]	BASALT, OLIVINE [7998]				NEOGENE [7998]	Collision	2	0.128755	0.05	18.412	0.83871		MICROCRYSTALLINE MATRIX [7998]	VOLCANIC ROCK					WHOLE_ROCK [7998]	50.14	2.14		15.46	0.02			11.7	8.44	5.15	0.14	0.01	1.29	3.74	0.5
[8708]	INTRAPLATE VOLCANICS	ANATOLIA-IRAN BELT - CENOZOIC/QUATERNARY / ANATOLIA / WESTERN ANATOLIAN VOLCANIC BELT	CANAKKALE, NORTHERN BIGA PENINSULA	26.83	26.83	40.08	40.08	SUBAERIAL			s EA255 [8708]	BASALT, ALKALINE [8708]	6470000 [8708]	11700000 [8708]		MIOCENE [8708]	Collision	1.87013	0.129905	0.0494382	12.0568	0.457859	8.91111	FINE-GRAINED GROUNDMASS [8708]	VOLCANIC ROCK			FRESH		WHOLE_ROCK [8708]	50.34	2.62		14.67				9.7	8.98	6.59	0.12		1.64	3.68	0.5
[15179]	INTRAPLATE VOLCANICS	ANATOLIA-IRAN BELT - CENOZOIC/QUATERNARY / LESSER CAUCASUS / KELBAJAR TROUGH		46	46	40.1	40.1	SUBAERIAL			s 33 [15179]	TRACHYANDESITE [15179]				NEOGENE [15179]	Collision	2	0.0571429	0.0490566	12.8571	3.66667	9.09091		VOLCANIC ROCK					WHOLE_ROCK [15179]	59.85	0.8		16.67		4.88	0.5		5.61	2.67	0.11		3.11	4.38	0.79
[16239]	INTRAPLATE VOLCANICS	ANATOLIA-IRAN BELT - CENOZOIC/QUATERNARY / ANATOLIA / EASTERN ANATOLIAN VOLCANIC BELT / KARACA(LI)DAG / SIVEREK PLATEAU BASALT		39.2687	39.2687	37.6866	37.6866	SUBAERIAL			s DS-126 [16239]	BASALT [16239]				NEOGENE [16239]	Collision	2.07547	0.146018	0.0489796	12.3894	0.602113	11.2273		VOLCANIC ROCK					WHOLE_ROCK [16239]	46.88	2.45		14.01	0.04			12.42	8.5	9.12	0.17		1.2	2.93	0.42
[15179]	INTRAPLATE VOLCANICS	ANATOLIA-IRAN BELT - CENOZOIC/QUATERNARY / LESSER CAUCASUS / KELBAJAR TROUGH		46	46	40.1	40.1	SUBAERIAL			s 21 [15179]	TRACHYBASALT [15179]				NEOGENE [15179]	Collision	2.22222	0.0526316	0.0488889	17.1053	1.05714	7		VOLCANIC ROCK					WHOLE_ROCK [15179]	51.84	1.36		16.64		6.11	1.01		8.58	4.42	0.11		2.92	4.14	1.31
[16239]	INTRAPLATE VOLCANICS	ANATOLIA-IRAN BELT - CENOZOIC/QUATERNARY / ANATOLIA / EASTERN ANATOLIAN VOLCANIC BELT / KARACA(LI)DAG / SIVEREK PLATEAU BASALT		39.2969	39.2969	37.8813	37.8813	SUBAERIAL			s DS-54 [16239]	BASALT [16239]				NEOGENE [16239]	Collision	1.90476	0.103896	0.0487805	9.43723	0.536585	12.6667		VOLCANIC ROCK					WHOLE_ROCK [16239]	45.01	2.37		12.96	0.06			12.33	8.23	11.63	0.16		1.27	3.22	0.46
[15825]	INTRAPLATE VOLCANICS	ANATOLIA-IRAN BELT - CENOZOIC/QUATERNARY / ANATOLIA / EASTERN ANATOLIAN VOLCANIC BELT / KARACA(LI)DAG		39	40.5	37	38	SUBAERIAL	962	962	s 3MO 30 [15825]	BASALT [15825]	1000000 [15825]	1900000 [15825]		NEOGENE [15825]	Collision	1.38462	0.084507	0.0486486	7.51174	0.242424		OL + PL-PHYRIC LAVAS [15825]	VOLCANIC ROCK					WHOLE_ROCK [15825]	45.4	3.29		12.49				13.76	9.3	10.38	0.18		0.68	2.57	0.41
[14503][15825]	INTRAPLATE VOLCANICS	ANATOLIA-IRAN BELT - CENOZOIC/QUATERNARY / ANATOLIA / EASTERN ANATOLIAN VOLCANIC BELT / KARACA(LI)DAG		39	40.5	37	38	SUBAERIAL	1113	1113	s 3MO 85 [14503]	BASALT [14503]	2600000 [14503] / 2700000 [15825]	11000000 [15825]		CENOZOIC [14503] / NEOGENE [15825]	Collision	1.05882	0.0757895	0.0485175	9.73684	0.255245	10.6522	PORPHYRITIC [14503] / SUBOPHITIC WITH OL + PL PHENOCRYSTS [15825]	VOLCANIC ROCK					WHOLE_ROCK [14503]	48.1732	3.39851		15.6737				12.5996	9.34893	6.29602	0.267574		0.837963	3.00618	0.398288
[8708]	INTRAPLATE VOLCANICS	ANATOLIA-IRAN BELT - CENOZOIC/QUATERNARY / ANATOLIA / WESTERN ANATOLIAN VOLCANIC BELT	CANAKKALE, NORTHERN BIGA PENINSULA	26.83	26.83	40.08	40.08	SUBAERIAL			s EA251 [8708]	BASALT, ALKALINE [8708]	6470000 [8708]	11700000 [8708]		MIOCENE [8708]	Collision	1.82759	0.128891	0.0483871	12.3346	0.429561	9.35321	FINE-GRAINED GROUNDMASS [8708]	VOLCANIC ROCK			FRESH		WHOLE_ROCK [8708]	50.13	2.58		14.65				9.59	9.43	6.54	0.14		1.62	3.65	0.49
[8708][19738][8477]	INTRAPLATE VOLCANICS	ANATOLIA-IRAN BELT - CENOZOIC/QUATERNARY / ANATOLIA / WESTERN ANATOLIAN VOLCANIC BELT / TASTEPE UNIT	CIVLER	26.3333	26.3333	39.9333	39.9333	SUBAERIAL			s EA249 [8708]	BASALT, ALKALINE [8708] / NOT GIVEN [19738]	6470000 [8708]	11700000 [8708]	UPPER [19738]	MIOCENE [8708] / CENOZOIC [8477]	Collision	1.72109	0.1265	0.0483871	12.25	0.443069	9.97015	FINE-GRAINED GROUNDMASS [8708]	VOLCANIC ROCK					WHOLE_ROCK [8708]	49.97	2.58		14.3				9.62	8.74	6.9	0.14		1.63	3.51	0.49
[15825]	INTRAPLATE VOLCANICS	ANATOLIA-IRAN BELT - CENOZOIC/QUATERNARY / ANATOLIA / EASTERN ANATOLIAN VOLCANIC BELT / KARACA(LI)DAG		39	40.5	37	38	SUBAERIAL	1104	1104	s 3MO 71 [15825]	BASALT [15825]	100000 [15825]	400000 [15825]		NEOGENE [15825]	Collision	1.86667	0.108527	0.0478261	9.14729	0.487805		OL + CPX-PHYRIC LAVAS [15825]	VOLCANIC ROCK					WHOLE_ROCK [15825]	49.13	2.6		13.15				10.65	8.5	9.51	0.26		1.25	3.29	0.47
[8477]	INTRAPLATE VOLCANICS	ANATOLIA-IRAN BELT - CENOZOIC/QUATERNARY / ANATOLIA / WESTERN ANATOLIAN VOLCANIC BELT / KOVACH DIKE SWARM	AYVACIK, SOUTH BIGA PENINSULA	26.4047	26.4047	39.6011	39.6011	SUBAERIAL			s EA413 [8477]	TRACHYANDESITE [8477]			LOWER [8477]	MIOCENE [8477]	Collision	17.1031	0.54015	0.0470588	20.0566	8.02	11.2132		VOLCANIC ROCK					WHOLE_ROCK [8477]	56.29	1.07		19.3				5.58	6.53	2.06	0.08		3.18	3.96	0.37
[12403]	INTRAPLATE VOLCANICS	ANATOLIA-IRAN BELT - CENOZOIC/QUATERNARY / ANATOLIA / EASTERN PONTIDES		39.6	39.8	40.8	41	SUBAERIAL			s E12 [12403]	TRACHYTE [12403]				CENOZOIC [12403]	Collision	19.3284	0.251456	0.0465116	16.4078	2.03314	28.6667		VOLCANIC ROCK					WHOLE_ROCK [12403]	58.92	0.47		17.63				3.7	4.01	1.36	0.08		5.32	5.46	0.22
[16034]	INTRAPLATE VOLCANICS	ANATOLIA-IRAN BELT - CENOZOIC/QUATERNARY / ANATOLIA / WESTERN ANATOLIAN VOLCANIC BELT	KARADIREK, SANDIKH	30.18	30.18	38.57	38.57	SUBAERIAL			s 05 KD 10 [16034]	LAMPROITE [16034]				NEOGENE [16034]	Collision	10.4403	0.414728	0.0463449	32.2082	5.8063	6.1162		VOLCANIC ROCK					WHOLE_ROCK [16034]	58.01	0.81		15.94				5.16	5.4	2.88	0.11		5.65	2.86	0.66
[8708]	INTRAPLATE VOLCANICS	ANATOLIA-IRAN BELT - CENOZOIC/QUATERNARY / ANATOLIA / WESTERN ANATOLIAN VOLCANIC BELT	CANAKKALE, NORTHERN BIGA PENINSULA	26.83	26.83	40.08	40.08	SUBAERIAL			s EA247 [8708]	BASALT, ALKALINE [8708]	6470000 [8708]	11700000 [8708]		MIOCENE [8708]	Collision	2.33728	0.132107	0.0462428	11.8027	0.471869	10.52	FINE-GRAINED GROUNDMASS [8708]	VOLCANIC ROCK			FRESH		WHOLE_ROCK [8708]	47.17	2.56		13.19				10.04	9.95	8.25	0.15		1.61	2.98	0.62
[16239]	INTRAPLATE VOLCANICS	ANATOLIA-IRAN BELT - CENOZOIC/QUATERNARY / ANATOLIA / EASTERN ANATOLIAN VOLCANIC BELT / KARACA(LI)DAG / SIVEREK PLATEAU BASALT		39.2647	39.2647	37.6453	37.6453	SUBAERIAL			s DS-130 [16239]	BASALT [16239]				NEOGENE [16239]	Collision	2.51572	0.168776	0.0461538	11.2236	0.640625	11.1739		VOLCANIC ROCK					WHOLE_ROCK [16239]	47.17	2.62		14.88	0.03			11.23	9.95	6.61	0.16		1.41	3.55	0.43
[15825]	INTRAPLATE VOLCANICS	ANATOLIA-IRAN BELT - CENOZOIC/QUATERNARY / ANATOLIA / EASTERN ANATOLIAN VOLCANIC BELT / KARACA(LI)DAG		39	40.5	37	38	SUBAERIAL	662	662	s OKB-2 [15825]	BASALT [15825]	100000 [15825]	400000 [15825]		NEOGENE [15825]	Collision	2.07792	0.13617	0.0458333	9.3617	0.65704	10.8095		VOLCANIC ROCK					WHOLE_ROCK [15825]	47.73	2.45		13.75				11.58	8.4	9.63	0.17		1.36	3.18	0.46
[16034]	INTRAPLATE VOLCANICS	ANATOLIA-IRAN BELT - CENOZOIC/QUATERNARY / ANATOLIA / WESTERN ANATOLIAN VOLCANIC BELT	KARADIREK, SANDIKH	30.18	30.18	38.57	38.57	SUBAERIAL			s 06 KD 23 [16034]	LAMPROITE [16034]				NEOGENE [16034]	Collision	9.23669	0.289196	0.0457785	24.2388	7.37535	7.03373		VOLCANIC ROCK					WHOLE_ROCK [16034]	59.06	0.86		15.47				5.49	5.15	2.37	0.12		6.04	3.53	0.67
[16064]	INTRAPLATE VOLCANICS	ANATOLIA-IRAN BELT - CENOZOIC/QUATERNARY / IRAN / LUT BLOCK	LUT-SISTAN REGION	60.1981	60.1981	31.6056	31.6056	SUBAERIAL			s Z-B-2-85 [16064]	BASALT, ALKALINE [16064]			UPPER [16064]	NEOGENE [16064]	Collision	1.66071	0.0982394	0.0456274	9.47183	0.988848	13.2934		VOLCANIC ROCK			FRESH		WHOLE_ROCK [16064]	47.41	2.59		14.21				9.49	8.8	7.84	0.14		1.39	3.68	0.61
[16034]	INTRAPLATE VOLCANICS	ANATOLIA-IRAN BELT - CENOZOIC/QUATERNARY / ANATOLIA / WESTERN ANATOLIAN VOLCANIC BELT	DENIZLI	26.75	26.75	38.37	38.37	SUBAERIAL			s 2103/1 [16034]	LAMPROITE [16034]				NEOGENE [16034]	Collision	17.3301	0.294385	0.0455453	10.1297	0.974186	10.6182		VOLCANIC ROCK					WHOLE_ROCK [16034]	56.92	0.93		14.62				4.77	6.37	4.09	0.1		4.59	4.15	0.77
[7599]	INTRAPLATE VOLCANICS	ANATOLIA-IRAN BELT - CENOZOIC/QUATERNARY / ANATOLIA / WESTERN ANATOLIAN VOLCANIC BELT / AFYON		30.457	30.5044	38.38	38.4241	SUBAERIAL			s SH3 [7599]	TRACHYBASALT [7599]				NEOGENE [7599]	Collision	7.61905	0.219178	0.0454545	20.3836	8.11765	9.04545		VOLCANIC ROCK					WHOLE_ROCK [7599]	48.73	1.17		18.08		1.95	4.68		9.63	6.13	0.13		4.06	2.74	0.76
[15825]	INTRAPLATE VOLCANICS	ANATOLIA-IRAN BELT - CENOZOIC/QUATERNARY / ANATOLIA / EASTERN ANATOLIAN VOLCANIC BELT / KARACA(LI)DAG		39	40.5	37	38	SUBAERIAL	1142	1142	s 3MO 28 [15825]	BASALT [15825]	1000000 [15825]	1900000 [15825]		NEOGENE [15825]	Collision	1.68852	0.0908824	0.0453721	6.79412	0.514512	10.087	OL + CPX-PHYRIC LAVAS [15825]	VOLCANIC ROCK					WHOLE_ROCK [15825]	48.4	2.78		15.29				10.61	9.19	7.04	0.26		1.43	3.37	0.45
[14503]	INTRAPLATE VOLCANICS	ANATOLIA-IRAN BELT - CENOZOIC/QUATERNARY / ANATOLIA / EASTERN ANATOLIAN VOLCANIC BELT / KARACA(LI)DAG		39	40.5	37	38	SUBAERIAL	935	935	s 3MO 84 [14503]	BASANITE [14503]	2600000 [14503]			CENOZOIC [14503]	Collision	1.07143	0.0724638	0.045	12.3671	0.28125		PORPHYRITIC [14503]	VOLCANIC ROCK					WHOLE_ROCK [14503]	43.272	4.75617		14.3463				15.8269	10.506	6.93539	0.258137		0.799743	2.90098	0.398429
[15825]	INTRAPLATE VOLCANICS	ANATOLIA-IRAN BELT - CENOZOIC/QUATERNARY / ANATOLIA / EASTERN ANATOLIAN VOLCANIC BELT / KARACA(LI)DAG		39	40.5	37	38	SUBAERIAL	983	983	s 3MO 62 [15825]	BASALT [15825]	100000 [15825]	400000 [15825]		NEOGENE [15825]	Collision	1.76471	0.0906344	0.044898	7.25076	0.346939		OL + CPX-PHYRIC LAVAS [15825]	VOLCANIC ROCK					WHOLE_ROCK [15825]	47.03	2.76		14.15				11.28	9.37	8.67	0.19		1.44	3.39	0.46
[8708]	INTRAPLATE VOLCANICS	ANATOLIA-IRAN BELT - CENOZOIC/QUATERNARY / ANATOLIA / WESTERN ANATOLIAN VOLCANIC BELT / EZINE VOLCANICS	EZINE, SOUTH BIGA PENINSULA	26.3325	26.3325	39.79	39.79	SUBAERIAL			s EA262 [8708]	BASALT, ALKALINE [8708]	6470000 [8708]	11700000 [8708]		MIOCENE [8708]	Collision	2.6648	0.129198	0.0448833	12.7167	0.333846	10.7513	FINE-GRAINED GROUNDMASS [8708]	VOLCANIC ROCK					WHOLE_ROCK [8708]	46.99	2.82		13.01				11	10.76	8.38	0.18		1.67	3.49	0.74
[8708]	INTRAPLATE VOLCANICS	ANATOLIA-IRAN BELT - CENOZOIC/QUATERNARY / ANATOLIA / WESTERN ANATOLIAN VOLCANIC BELT	CANAKKALE, NORTHERN BIGA PENINSULA	26.83	26.83	40.08	40.08	SUBAERIAL			s EA242 [8708]	BASALT, ALKALINE [8708]	6470000 [8708]	11700000 [8708]		MIOCENE [8708]	Collision	2.63687	0.128962	0.0447227	10.9235	0.302548	10.1141	FINE-GRAINED GROUNDMASS [8708]	VOLCANIC ROCK			FRESH		WHOLE_ROCK [8708]	46.39	2.84		12.87				10.99	9.83	8.47	0.17		1.57	3.02	0.72
[15825]	INTRAPLATE VOLCANICS	ANATOLIA-IRAN BELT - CENOZOIC/QUATERNARY / ANATOLIA / EASTERN ANATOLIAN VOLCANIC BELT / KARACA(LI)DAG		39	40.5	37	38	SUBAERIAL	969	969	s 3MO 5 [15825]	BASALT [15825]	1000000 [15825]	1900000 [15825]		NEOGENE [15825]	Collision	2	0.10989	0.0446809	8.71795	0.529412		OL-PHYRIC LAVAS [15825]	VOLCANIC ROCK					WHOLE_ROCK [15825]	51.22	2.89		16.07				13.79	9.87	9.9	0.24		1.19	3.29	0.02
[16239]	INTRAPLATE VOLCANICS	ANATOLIA-IRAN BELT - CENOZOIC/QUATERNARY / ANATOLIA / EASTERN ANATOLIAN VOLCANIC BELT / KARACA(LI)DAG / SIVEREK PLATEAU BASALT		39.3164	39.3164	37.6886	37.6886	SUBAERIAL			s DS-133 [16239]	BASALT [16239]				NEOGENE [16239]	Collision	1.24088	0.0913978	0.0434783	11.7204	0.329317	12.1304		VOLCANIC ROCK					WHOLE_ROCK [16239]	45.95	3.06		15.3	0.02			12.8	9.96	6.22	0.17		0.9	3.3	0.46
[8477]	INTRAPLATE VOLCANICS	ANATOLIA-IRAN BELT - CENOZOIC/QUATERNARY / ANATOLIA / WESTERN ANATOLIAN VOLCANIC BELT / KOVACLI DIKE	BABAKALE	26.0936	26.0936	39.4752	39.4752	SUBAERIAL			s EA53 [8477]	TRACHYANDESITE [8477]			LOWER [8477]	MIOCENE [8477]	Collision	16.4719	0.438594	0.0434084	23.8669	10.3277	8.25786		VOLCANIC ROCK					WHOLE_ROCK [8477]	58.95	0.83		19.75				4.27	6.31	1.15	0.07		3.42	3.98	0.35
[10708]	INTRAPLATE VOLCANICS	ANATOLIA-IRAN BELT - CENOZOIC/QUATERNARY / ANATOLIA / WESTERN ANATOLIAN VOLCANIC BELT	BIGA PENINSULA	26	26.5	39	40	SUBAERIAL			s EA270 [10708]	BASANITE [10708]	8300000 [10708]	11000000 [10708]		MIOCENE [10708]	Collision	3.83966	0.129574	0.0429836	9.71807	0.210474	13.3032		VOLCANIC ROCK					WHOLE_ROCK [10708]	41.81	3.14		12.76				12.94	11.03	7.74	0.22		1.52	5.33	1.25
[8477][19738]	INTRAPLATE VOLCANICS	ANATOLIA-IRAN BELT - CENOZOIC/QUATERNARY / ANATOLIA / WESTERN ANATOLIAN VOLCANIC BELT / AYVACIK VOLCANICS	AYVACIK, SOUTH BIGA PENINSULA	26.4047	26.4047	39.6011	39.6011	SUBAERIAL			s EA270 [8477]	BASANITE [8477] / NOT GIVEN [19738]			UPPER [8477]	MIOCENE [8477]	Collision	3.83966	0.129574	0.0429836	9.71807	0.210474	13.3032		VOLCANIC ROCK					WHOLE_ROCK [8477]	41.81	3.14		12.76				12.94	11.03	7.74	0.22		1.52	5.33	1.25
[8708]	INTRAPLATE VOLCANICS	ANATOLIA-IRAN BELT - CENOZOIC/QUATERNARY / ANATOLIA / WESTERN ANATOLIAN VOLCANIC BELT / TASTEPE VOLCANICS	TASTEPE, SOUTH BIGA PENINSULA	26.8333	26.8333	40.35	40.35	SUBAERIAL			s EA254 [8708]	BASALT, ALKALINE [8708]	6470000 [8708]	11700000 [8708]		MIOCENE [8708]	Collision	2.86339	0.135471	0.042517	11.7839	0.23913	10.5684	FINE-GRAINED GROUNDMASS [8708]	VOLCANIC ROCK					WHOLE_ROCK [8708]	45.69	2.78		13.29				10.91	9.96	9.62	0.17		1.57	4.25	0.79
[8708]	INTRAPLATE VOLCANICS	ANATOLIA-IRAN BELT - CENOZOIC/QUATERNARY / ANATOLIA / WESTERN ANATOLIAN VOLCANIC BELT	CANAKKALE, NORTHERN BIGA PENINSULA	26.83	26.83	40.08	40.08	SUBAERIAL			s EA528 [8708]	BASANITE [8708]	6470000 [8708]	11700000 [8708]		MIOCENE [8708]	Collision	2.86885	0.134477	0.042517	10.3151	0.32263	9.52857	FINE-GRAINED GROUNDMASS [8708]	VOLCANIC ROCK			FRESH		WHOLE_ROCK [8708]	44.95	2.97		13.48				10.64	10.09	8.88	0.17		1.62	3.67	0.82
[10708]	INTRAPLATE VOLCANICS	ANATOLIA-IRAN BELT - CENOZOIC/QUATERNARY / ANATOLIA / WESTERN ANATOLIAN VOLCANIC BELT	BIGA PENINSULA	26	26.5	39	40	SUBAERIAL			s EA268 [10708]	BASANITE [10708]	8300000 [10708]	11000000 [10708]		MIOCENE [10708]	Collision	3.88	0.130513	0.0418848	9.6726	0.226141	10.0408		VOLCANIC ROCK					WHOLE_ROCK [10708]	42.2	3.14		12.65				12.95	10.96	7.94	0.23		2.49	4.33	1.24
[12403]	INTRAPLATE VOLCANICS	ANATOLIA-IRAN BELT - CENOZOIC/QUATERNARY / ANATOLIA / EASTERN PONTIDES		39.6	39.8	40.8	41	SUBAERIAL			s YB4A [12403]	TRACHYANDESITE, BASALTIC [12403]				CENOZOIC [12403]	Collision	13.2039	0.19209	0.0416667	15.6215	2.70918	11.4545		VOLCANIC ROCK					WHOLE_ROCK [12403]	53.48	0.99		17.33				5.9	8.55	4.1	0.09		3.7	3.57	0.48
[8708][19738]	INTRAPLATE VOLCANICS	ANATOLIA-IRAN BELT - CENOZOIC/QUATERNARY / ANATOLIA / WESTERN ANATOLIAN VOLCANIC BELT	CANAKKALE, NORTHERN BIGA PENINSULA	26.83	26.83	40.08	40.08	SUBAERIAL			s EA531 [8708]	BASANITE [8708] / NOT GIVEN [19738]	6470000 [8708]	11680000 [8708]	UPPER [19738]	MIOCENE [8708]	Collision	3.61062	0.128768	0.0414993	11.9852	0.428571	12.0722	FINE-GRAINED GROUNDMASS [8708]	VOLCANIC ROCK			FRESH		WHOLE_ROCK [8708]	42.66	3.22		13.44				11.87	10.73	7.17	0.21		1.58	4.65	1.09
[15825]	INTRAPLATE VOLCANICS	ANATOLIA-IRAN BELT - CENOZOIC/QUATERNARY / ANATOLIA / EASTERN ANATOLIAN VOLCANIC BELT / KARACA(LI)DAG		39	40.5	37	38	SUBAERIAL	1811	1811	s 3MO 95 [15825]	BASALT [15825]	1000000 [15825]	1900000 [15825]		NEOGENE [15825]	Collision	1.44056	0.0792308	0.0413793	6.11538	0.288889	12.2727	OL + CPX + PL-PHYRIC LAVAS [15825]	VOLCANIC ROCK					WHOLE_ROCK [15825]	46.58	3.09		13.98				10.55	9.18	10.17	0.24		1.01	3.63	0.39
[7599]	INTRAPLATE VOLCANICS	ANATOLIA-IRAN BELT - CENOZOIC/QUATERNARY / ANATOLIA / WESTERN ANATOLIAN VOLCANIC BELT / AFYON		30.457	30.5044	38.38	38.4241	SUBAERIAL			s SH20 [7599]	TRACHYANDESITE [7599]				NEOGENE [7599]	Collision	15.9091	0.421687	0.0410256	21.1446	5.85185	8.0625		VOLCANIC ROCK					WHOLE_ROCK [7599]	59.17	0.92		15.48		5.09	0.44		5.61	3.42	0.09		5.19	2.98	0.58
[8708]	INTRAPLATE VOLCANICS	ANATOLIA-IRAN BELT - CENOZOIC/QUATERNARY / ANATOLIA / WESTERN ANATOLIAN VOLCANIC BELT	CANAKKALE, NORTHERN BIGA PENINSULA	26.83	26.83	40.08	40.08	SUBAERIAL			s EA534 [8708]	BASANITE [8708]	6470000 [8708]	11700000 [8708]		MIOCENE [8708]	Collision	3.60455	0.127636	0.0408719	8.08466	0.423746	11.8	FINE-GRAINED GROUNDMASS [8708]	VOLCANIC ROCK			FRESH		WHOLE_ROCK [8708]	42.88	3.23		13.32				11.77	10.74	7.17	0.21		1.55	4.56	1.12
[8708]	INTRAPLATE VOLCANICS	ANATOLIA-IRAN BELT - CENOZOIC/QUATERNARY / ANATOLIA / WESTERN ANATOLIAN VOLCANIC BELT	CANAKKALE, NORTHERN BIGA PENINSULA	26.83	26.83	40.08	40.08	SUBAERIAL			s EA258 [8708]	BASANITE [8708]	6470000 [8708]	11700000 [8708]		MIOCENE [8708]	Collision	3.60811	0.130032	0.0406504	9.77435	0.201461	10.3807	FINE-GRAINED GROUNDMASS [8708]	VOLCANIC ROCK			FRESH		WHOLE_ROCK [8708]	44.33	3.04		12.49				12.66	10.94	8.33	0.2		1.23	4.22	1.09
[10708]	INTRAPLATE VOLCANICS	ANATOLIA-IRAN BELT - CENOZOIC/QUATERNARY / ANATOLIA / WESTERN ANATOLIAN VOLCANIC BELT	BIGA PENINSULA	26	26.5	39	40	SUBAERIAL			s EA248 [10708]	BASANITE [10708]	8300000 [10708]	11000000 [10708]		MIOCENE [10708]	Collision	4	0.134897	0.0405759	9.64956	0.315682	11.716		VOLCANIC ROCK					WHOLE_ROCK [10708]	41.94	3.13		12.86				12.39	10.99	7.82	0.22		1.56	5.23	1.25
[16064]	INTRAPLATE VOLCANICS	ANATOLIA-IRAN BELT - CENOZOIC/QUATERNARY / IRAN / LUT BLOCK	LUT-SISTAN REGION	60.2089	60.2089	31.6733	31.6733	SUBAERIAL			s Z-BKH-1 [16064]	BASALT, ALKALINE [16064]			UPPER [16064]	NEOGENE [16064]	Collision	2.11364	0.0745491	0.040404	7.25451	0.666667	14.1618		VOLCANIC ROCK			FRESH		WHOLE_ROCK [16064]	48.08	2.44		14.95				8.67	9.48	5.6	0.13		1.25	4.38	1.04
[8708]	INTRAPLATE VOLCANICS	ANATOLIA-IRAN BELT - CENOZOIC/QUATERNARY / ANATOLIA / WESTERN ANATOLIAN VOLCANIC BELT	CANAKKALE, NORTHERN BIGA PENINSULA	26.83	26.83	40.08	40.08	SUBAERIAL			s EA259 [8708]	BASANITE [8708]	6470000 [8708]	11700000 [8708]		MIOCENE [8708]	Collision	3.51628	0.12901	0.0402219	10.1809	0.202407	10.6094	FINE-GRAINED GROUNDMASS [8708]	VOLCANIC ROCK			FRESH		WHOLE_ROCK [8708]	44.84	2.98		13.01				12.26	10.91	7.52	0.2		1.46	4.34	1.08
[8708]	INTRAPLATE VOLCANICS	ANATOLIA-IRAN BELT - CENOZOIC/QUATERNARY / ANATOLIA / WESTERN ANATOLIAN VOLCANIC BELT / EZINE VOLCANICS	EZINE, SOUTH BIGA PENINSULA	26.3325	26.3325	39.79	39.79	SUBAERIAL			s EA260 [8708]	BASANITE [8708]	6470000 [8708]	11700000 [8708]		MIOCENE [8708]	Collision	3.48792	0.132113	0.0400572	9.35956	0.232527	12.503	FINE-GRAINED GROUNDMASS [8708]	VOLCANIC ROCK					WHOLE_ROCK [8708]	42.75	3.09		12.87				12.87	10.91	8.19	0.21		1.42	4.33	0.99
[16064]	INTRAPLATE VOLCANICS	ANATOLIA-IRAN BELT - CENOZOIC/QUATERNARY / IRAN / LUT BLOCK	LUT-SISTAN REGION	60.8833	60.8833	31.3356	31.3356	SUBAERIAL			s 08-112 [16064]	BASALT, ALKALINE [16064]			UPPER [16064]	NEOGENE [16064]	Collision	1.88095	0.0692982	0.0397727	7.10526	0.734286	6.22951		VOLCANIC ROCK			FRESH		WHOLE_ROCK [16064]	48.84	2.25		15.85				8.76	9.06	5.82	0.14		1.24	5.02	1.1
[16064]	INTRAPLATE VOLCANICS	ANATOLIA-IRAN BELT - CENOZOIC/QUATERNARY / IRAN / LUT BLOCK	LUT-SISTAN REGION	60.2328	60.2328	32.445	32.445	SUBAERIAL			s Z-B-1-85 [16064]	BASALT, ALKALINE [16064]			UPPER [16064]	NEOGENE [16064]	Collision	2.28743	0.120505	0.0393443	9.96845	1.42373	14.0741		VOLCANIC ROCK			FRESH		WHOLE_ROCK [16064]	47.34	2.89		13.63				10.21	8.35	7.5	0.16		1.88	3.65	0.64
[16034]	INTRAPLATE VOLCANICS	ANATOLIA-IRAN BELT - CENOZOIC/QUATERNARY / ANATOLIA / WESTERN ANATOLIAN VOLCANIC BELT	KARADIREK, SANDIKH	30.18	30.18	38.57	38.57	SUBAERIAL			s 05 KD 05 [16034]	LAMPROITE [16034]				NEOGENE [16034]	Collision	10.9297	0.420036	0.0387937	34.7682	7.07007	6.48749		VOLCANIC ROCK					WHOLE_ROCK [16034]	58.81	0.87		15.42				4.8	5.42	2.41	0.09		5.91	4	0.66
[16064]	INTRAPLATE VOLCANICS	ANATOLIA-IRAN BELT - CENOZOIC/QUATERNARY / IRAN / LUT BLOCK	LUT-SISTAN REGION	60.8439	60.8439	29.9797	29.9797	SUBAERIAL			s 10-10 [16064]	BASALT, ALKALINE [16064]			UPPER [16064]	NEOGENE [16064]	Collision	5.0458	0.126145	0.0385396	10.9924	1.01701	10.8029		VOLCANIC ROCK			FRESH		WHOLE_ROCK [16064]	52.69	1.9		15.07				7	8.87	5.17	0.11		1.65	4.39	0.98
[8708]	INTRAPLATE VOLCANICS	ANATOLIA-IRAN BELT - CENOZOIC/QUATERNARY / ANATOLIA / WESTERN ANATOLIAN VOLCANIC BELT	THRACE BASIN	26.5	27.5	40.5	41.5	SUBAERIAL			s EA513 [8708]	BASANITE [8708]	7650000 [8708]	11200000 [8708]		MIOCENE [8708]	Collision	3.50704	0.157048	0.0381526	12.8508	0.270977	8.79812	FINE-GRAINED GROUNDMASS [8708]	VOLCANIC ROCK			FRESH		WHOLE_ROCK [8708]	45.97	2.97		13.09				11.25	10.16	8.45	0.17		1.52	3.51	0.69
[15825]	INTRAPLATE VOLCANICS	ANATOLIA-IRAN BELT - CENOZOIC/QUATERNARY / ANATOLIA / EASTERN ANATOLIAN VOLCANIC BELT / KARACA(LI)DAG		39	40.5	37	38	SUBAERIAL	969	969	s 3MO 6 [15825]	BASANITE [15825]	1000000 [15825]	1900000 [15825]		NEOGENE [15825]	Collision	1.89241	0.111567	0.0377358	8.73134	0.509091	10.4286	SUBOPHITIC WITH ONLY OL PHENOCRYSTS [15825]	VOLCANIC ROCK					WHOLE_ROCK [15825]	43.81	4.55		11.35				16.17	9.13	9.27	0.25		0.81	2.39	0.48
[8708][19738]	INTRAPLATE VOLCANICS	ANATOLIA-IRAN BELT - CENOZOIC/QUATERNARY / ANATOLIA / WESTERN ANATOLIAN VOLCANIC BELT	THRACE BASIN	26.5	27.5	40.5	41.5	SUBAERIAL			s EA515 [8708]	BASANITE [8708] / NOT GIVEN [19738]	7650000 [8708]	11200000 [8708]	UPPER [19738]	MIOCENE [8708]	Collision	2.73485	0.143482	0.0368764	15.3657	0.348511	8.76804	FINE-GRAINED GROUNDMASS [8708]	VOLCANIC ROCK			FRESH		WHOLE_ROCK [8708]	43.99	2.6		11.68				9.82	8.89	13.37	0.16		2.12	3.44	0.76
[15825]	INTRAPLATE VOLCANICS	ANATOLIA-IRAN BELT - CENOZOIC/QUATERNARY / ANATOLIA / EASTERN ANATOLIAN VOLCANIC BELT / KARACA(LI)DAG		39	40.5	37	38	SUBAERIAL	1328	1328	s 3MO 76 [15825]	BASALT [15825]	1000000 [15825]	1900000 [15825]		NEOGENE [15825]	Collision	1.75	0.0789474	0.0355556	6.84211	0.295455		OL + CPX-PHYRIC LAVAS [15825]	VOLCANIC ROCK					WHOLE_ROCK [15825]	45.58	3.43		12.35				10.94	9.84	11.38	0.22		1.28	3.23	0.52
[16034]	INTRAPLATE VOLCANICS	ANATOLIA-IRAN BELT - CENOZOIC/QUATERNARY / ANATOLIA / WESTERN ANATOLIAN VOLCANIC BELT	KARADIREK, SANDIKH	30.18	30.18	38.57	38.57	SUBAERIAL			s 05 KD 13 [16034]	LAMPROITE [16034]				NEOGENE [16034]	Collision	11.2834	0.405418	0.0340652	33.4927	11.9175	4.99197		VOLCANIC ROCK					WHOLE_ROCK [16034]	55.66	1.24		11.17				5.05	8.29	6.51	0.09		6.73	1.7	1.37
[15825]	INTRAPLATE VOLCANICS	ANATOLIA-IRAN BELT - CENOZOIC/QUATERNARY / ANATOLIA / EASTERN ANATOLIAN VOLCANIC BELT / KARACA(LI)DAG		39	40.5	37	38	SUBAERIAL	1169	1169	s 3MO 15 [15825]	BASANITE [15825]	1000000 [15825]	1900000 [15825]		NEOGENE [15825]	Collision	2.84615	0.0752033	0.0339623	5.77236	0.275862		OL-PHYRIC LAVAS [15825]	VOLCANIC ROCK					WHOLE_ROCK [15825]	45.04	3.13		13.19				11.61	9.15	10.24	0.21		1.62	3.8	0.71
[16064]	INTRAPLATE VOLCANICS	ANATOLIA-IRAN BELT - CENOZOIC/QUATERNARY / IRAN / LUT BLOCK	LUT-SISTAN REGION	60.1067	60.1067	31.5392	31.5392	SUBAERIAL			s 09-10 [16064]	BASALT, ALKALINE [16064]			UPPER [16064]	NEOGENE [16064]	Collision	4.59	0.0989224	0.0328638	10.6681	1.16854	5		VOLCANIC ROCK			FRESH		WHOLE_ROCK [16064]	54.47	1.45		16.49				5.34	8.6	3.48	0.08		1.47	5.44	0.82
[16064]	INTRAPLATE VOLCANICS	ANATOLIA-IRAN BELT - CENOZOIC/QUATERNARY / IRAN / LUT BLOCK	LUT-SISTAN REGION	60.1181	60.1181	31.4403	31.4403	SUBAERIAL			s 10-08 [16064]	BASALT, ALKALINE [16064]			UPPER [16064]	NEOGENE [16064]	Collision	4.82692	0.114612	0.0326087	9.22374	0.892193	10.098		VOLCANIC ROCK			FRESH		WHOLE_ROCK [16064]	54.43	1.65		16.33				5.7	8.35	3.64	0.09		1.59	5.01	0.87
[15825]	INTRAPLATE VOLCANICS	ANATOLIA-IRAN BELT - CENOZOIC/QUATERNARY / ANATOLIA / EASTERN ANATOLIAN VOLCANIC BELT / KARACA(LI)DAG		39	40.5	37	38	SUBAERIAL	1250	1250	s 3MO 75 [15825]	BASANITE [15825]	100000 [15825]	400000 [15825]		NEOGENE [15825]	Collision	1.568	0.0753846	0.0321285	10.1538	0.265934	11.8333	OL + CPX-PHYRIC LAVAS [15825]	VOLCANIC ROCK					WHOLE_ROCK [15825]	44.91	3.49		12.61				11.27	10.41	10.89	0.21		1.28	3.14	0.54
[16034]	INTRAPLATE VOLCANICS	ANATOLIA-IRAN BELT - CENOZOIC/QUATERNARY / ANATOLIA / WESTERN ANATOLIAN VOLCANIC BELT	KARADIREK, SANDIKH	30.18	30.18	38.57	38.57	SUBAERIAL			s 06 KD 21 [16034]	LAMPROITE [16034]				NEOGENE [16034]	Collision	11.6508	0.446288	0.0320339	30.5555	13.3667	4.9911		VOLCANIC ROCK					WHOLE_ROCK [16034]	54.97	1.24		11.06				5.91	8.41	6.26	0.09		6.77	1.86	1.37
[16064]	INTRAPLATE VOLCANICS	ANATOLIA-IRAN BELT - CENOZOIC/QUATERNARY / IRAN / LUT BLOCK	LUT-SISTAN REGION	57.3408	57.3408	32.9525	32.9525	SUBAERIAL			s Z-BKH-2 [16064]	BASALT, ALKALINE [16064]			UPPER [16064]	NEOGENE [16064]	Collision	4.42478	0.104822	0.03125	7.42138	0.69403	10.8491		VOLCANIC ROCK			FRESH		WHOLE_ROCK [16064]	52.87	1.59		16.09				5.83	7.31	3.73	0.11		0.97	5.03	0.8
[16064]	INTRAPLATE VOLCANICS	ANATOLIA-IRAN BELT - CENOZOIC/QUATERNARY / IRAN / LUT BLOCK	LUT-SISTAN REGION	60.8822	60.8822	31.3333	31.3333	SUBAERIAL			s 09-09 [16064]	BASALT, ALKALINE [16064]			UPPER [16064]	NEOGENE [16064]	Collision	4.09	0.11084	0.0307692	9.43089	1.22093	4.35294		VOLCANIC ROCK			FRESH		WHOLE_ROCK [16064]	56.98	1.44		17.07				5.22	7.02	3.28	0.08		1.44	5.4	0.72
[15825]	INTRAPLATE VOLCANICS	ANATOLIA-IRAN BELT - CENOZOIC/QUATERNARY / ANATOLIA / EASTERN ANATOLIAN VOLCANIC BELT / KARACA(LI)DAG		39	40.5	37	38	SUBAERIAL	1078	1078	s 3MO 72 [15825]	BASANITE [15825]	100000 [15825]	400000 [15825]		NEOGENE [15825]	Collision	3.25	0.0840065	0.0295775	5.99354	0.2		OL + CPX-PHYRIC LAVAS [15825]	VOLCANIC ROCK					WHOLE_ROCK [15825]	43.44	3.61		12.61				11.81	9.66	9.78	0.23		2.01	4.55	0.99
[16034]	INTRAPLATE VOLCANICS	ANATOLIA-IRAN BELT - CENOZOIC/QUATERNARY / ANATOLIA / WESTERN ANATOLIAN VOLCANIC BELT	DENIZLI	26.75	26.75	38.37	38.37	SUBAERIAL			s 2108/1 [16034]	LAMPROITE [16034]				NEOGENE [16034]	Collision	14.8744	0.194549	0.0288703	11.7865	2.17605	6.83203		VOLCANIC ROCK					WHOLE_ROCK [16034]	57.6	0.96		13.15				4.28	6.23	4.44	0.07		5	3.56	0.91
[15825]	INTRAPLATE VOLCANICS	ANATOLIA-IRAN BELT - CENOZOIC/QUATERNARY / ANATOLIA / EASTERN ANATOLIAN VOLCANIC BELT / KARACA(LI)DAG		39	40.5	37	38	SUBAERIAL	1666	1666	s 3MO 20 [15825]	BASANITE [15825]	1000000 [15825]	1900000 [15825]		NEOGENE [15825]	Collision	2.69655	0.0703237	0.0283019	5.91727	0.342271	11.7778	OL-PHYRIC LAVAS [15825]	VOLCANIC ROCK					WHOLE_ROCK [15825]	45.17	2.89		13.27				11.75	8.42	10.56	0.21		1.8	3.93	0.68
[16034]	INTRAPLATE VOLCANICS	ANATOLIA-IRAN BELT - CENOZOIC/QUATERNARY / ANATOLIA / WESTERN ANATOLIAN VOLCANIC BELT	ILYASLI, AFYON	30.4844	30.4844	38.4628	38.4628	SUBAERIAL			s 05 IL 01 [16034]	LAMPROITE [16034]				NEOGENE [16034]	Collision	9.25107	0.448455	0.0282156	75.514	5.88588	6.1027		VOLCANIC ROCK					WHOLE_ROCK [16034]	54.91	1.34		10.92				5.54	7.18	5.06	0.08		8.19	1.7	1.83
[14503]	INTRAPLATE VOLCANICS	ANATOLIA-IRAN BELT - CENOZOIC/QUATERNARY / ANATOLIA / EASTERN ANATOLIAN VOLCANIC BELT / KARACA(LI)DAG		39	40.5	37	38	SUBAERIAL	925	925	s 3MO 118 [14503]	BASANITE [14503]	2600000 [14503]			CENOZOIC [14503]	Collision	2.45455	0.0813253	0.0267857	5.39157	0.208333		PORPHYRITIC [14503]	VOLCANIC ROCK					WHOLE_ROCK [14503]	44.3655	3.25154		12.2554				14.4511	9.13399	10.7446	0.162675		1.17745	3.70713	0.75059
[15825]	INTRAPLATE VOLCANICS	ANATOLIA-IRAN BELT - CENOZOIC/QUATERNARY / ANATOLIA / EASTERN ANATOLIAN VOLCANIC BELT / KARACA(LI)DAG		39	40.5	37	38	SUBAERIAL	1074	1074	s 3MO 70 [15825]	BASANITE [15825]	100000 [15825]	400000 [15825]		NEOGENE [15825]	Collision	2.3141	0.0796909	0.0267606	6.15894	0.255061	12.0526	OL-PHYRIC LAVAS [15825]	VOLCANIC ROCK					WHOLE_ROCK [15825]	45	3.51		12.61				12.18	8.49	9.89	0.21		1.88	4.04	0.82
[16239]	INTRAPLATE VOLCANICS	ANATOLIA-IRAN BELT - CENOZOIC/QUATERNARY / ANATOLIA / EASTERN ANATOLIAN VOLCANIC BELT / KARACA(LI)DAG / SIVEREK PLATEAU BASALT		39.4242	39.4242	38.0587	38.0587	SUBAERIAL			s DS-49 [16239]	BASALT [16239]				NEOGENE [16239]	Collision	3.59375	0.0900196	0.0258427	6.61448	0.373106	13.7273		VOLCANIC ROCK					WHOLE_ROCK [16239]	46.65	2.25		14.73	0.02			12.27	6.81	5.98	0.17		2.32	5.25	0.95
[14503]	INTRAPLATE VOLCANICS	ANATOLIA-IRAN BELT - CENOZOIC/QUATERNARY / ANATOLIA / EASTERN ANATOLIAN VOLCANIC BELT / KARACA(LI)DAG		39	40.5	37	38	SUBAERIAL	711	711	s 3MO 110 [14503]	BASANITE [14503]	2600000 [14503]			CENOZOIC [14503]	Collision	3.78571	0.104126	0.0257143	6.52259	0.255556		PORPHYRITIC-GLOMEROPORPHYRITIC [14503]	VOLCANIC ROCK					WHOLE_ROCK [14503]	44.2523	3.54329		11.8224				13.5918	9.38003	9.62399	0.214235		1.966	4.62611	0.979825
[15825]	INTRAPLATE VOLCANICS	ANATOLIA-IRAN BELT - CENOZOIC/QUATERNARY / ANATOLIA / EASTERN ANATOLIAN VOLCANIC BELT / KARACA(LI)DAG		39	40.5	37	38	SUBAERIAL	1215	1215	s 3MO 16 [15825]	BASANITE [15825]	1000000 [15825]	1900000 [15825]		NEOGENE [15825]	Collision	2.72727	0.0884718	0.0252525	5.33512	0.280374	12.6	OL + CPX-PHYRIC LAVAS [15825]	VOLCANIC ROCK					WHOLE_ROCK [15825]	44.36	3.59		13.24				12.22	9.27	10	0.19		1.67	3.4	0.71
[10708]	INTRAPLATE VOLCANICS	ANATOLIA-IRAN BELT - CENOZOIC/QUATERNARY / ANATOLIA / WESTERN ANATOLIAN VOLCANIC BELT / KULA VOLCANIC FIELD		28	29	38.2	38.8	SUBAERIAL			s EA131 [10708]	BASALT, ALKALINE [10708]	130000 [10708]	1940000 [10708]		NEOGENE [10708]	Collision	3.0553	0.15273	0.0251451	11.9581	0.612613	12.6306		VOLCANIC ROCK					WHOLE_ROCK [10708]	47.12	1.93		18.57				7.37	7.68	6.79	0.15		2.39	5.74	0.95
[16034]	INTRAPLATE VOLCANICS	ANATOLIA-IRAN BELT - CENOZOIC/QUATERNARY / ANATOLIA / WESTERN ANATOLIAN VOLCANIC BELT	DENIZLI	26.75	26.75	38.37	38.37	SUBAERIAL			s 2107/3 [16034]	LAMPROITE [16034]				NEOGENE [16034]	Collision	19.5347	0.205988	0.0250304	8.89157	1.57973	6.35261		VOLCANIC ROCK					WHOLE_ROCK [16034]	57.57	0.98		13.1				4.41	6.59	4.73	0.08		5.01	3.54	0.94
[15825]	INTRAPLATE VOLCANICS	ANATOLIA-IRAN BELT - CENOZOIC/QUATERNARY / ANATOLIA / EASTERN ANATOLIAN VOLCANIC BELT / KARACA(LI)DAG		39	40.5	37	38	SUBAERIAL	1014	1014	s 3MO 101 [15825]	BASANITE [15825]	1000000 [15825]	1900000 [15825]		NEOGENE [15825]	Collision	2.61538	0.0745614	0.0246575	6.27193	0.253731		OL-PHYRIC LAVAS [15825]	VOLCANIC ROCK					WHOLE_ROCK [15825]	44.75	3.28		14.41				11.76	9.49	8.22	0.17		1.82	4.1	0.69
[16239]	INTRAPLATE VOLCANICS	ANATOLIA-IRAN BELT - CENOZOIC/QUATERNARY / ANATOLIA / EASTERN ANATOLIAN VOLCANIC BELT / KARACA(LI)DAG / SIVEREK PLATEAU BASALT		39.8532	39.8532	38.015	38.015	SUBAERIAL			s DS-48 [16239]	BASALT [16239]				NEOGENE [16239]	Collision	3.7931	0.0964912	0.0238636	6.38158	0.363296	17.8		VOLCANIC ROCK					WHOLE_ROCK [16239]	46.53	2.4		15.3	0.02			12	6.9	5.89	0.16		2.25	5.31	0.76
[15825]	INTRAPLATE VOLCANICS	ANATOLIA-IRAN BELT - CENOZOIC/QUATERNARY / ANATOLIA / EASTERN ANATOLIAN VOLCANIC BELT / KARACA(LI)DAG		39	40.5	37	38	SUBAERIAL	1808	1808	s 3MO 91 [15825]	BASANITE [15825]	1000000 [15825]	1900000 [15825]		NEOGENE [15825]	Collision	2.83333	0.0745614	0.0228571	4.95614	0.246154		OL-PHYRIC LAVAS [15825]	VOLCANIC ROCK					WHOLE_ROCK [15825]	44.41	3.78		13.19				12.75	8.51	9.3	0.21		1.79	3.89	0.75
[16034]	INTRAPLATE VOLCANICS	ANATOLIA-IRAN BELT - CENOZOIC/QUATERNARY / ANATOLIA / WESTERN ANATOLIAN VOLCANIC BELT	DENIZLI	26.75	26.75	38.37	38.37	SUBAERIAL			s 2107/1 [16034]	LAMPROITE [16034]				NEOGENE [16034]	Collision	17.0078	0.181714	0.0225922	10.7542	1.74071	5.84671		VOLCANIC ROCK					WHOLE_ROCK [16034]	57.23	0.99		13.08				4.38	6.62	4.72	0.07		4.99	3.55	0.94
[16034]	INTRAPLATE VOLCANICS	ANATOLIA-IRAN BELT - CENOZOIC/QUATERNARY / ANATOLIA / WESTERN ANATOLIAN VOLCANIC BELT / AFYON	ISCEHISAR	30.67	30.67	38.75	38.75	SUBAERIAL			s 07IMR05 [16034]	LAMPROITE [16034]				NEOGENE [16034]	Collision	8.42117	0.283456	0.020708	32.055	5.53156	6.2388		VOLCANIC ROCK					WHOLE_ROCK [16034]	57.07	1.3		14.47				5.28	5.95	3.66	0.08		5.86	2.34	0.87
[16034]	INTRAPLATE VOLCANICS	ANATOLIA-IRAN BELT - CENOZOIC/QUATERNARY / ANATOLIA / WESTERN ANATOLIAN VOLCANIC BELT	DENIZLI	26.75	26.75	38.37	38.37	SUBAERIAL			s 2108 [16034]	LAMPROITE [16034]				NEOGENE [16034]	Collision	21.8631	0.255629	0.0195362	11.8776	1.81164	4.76338		VOLCANIC ROCK					WHOLE_ROCK [16034]	57.64	0.97		13.11				4.32	6.48	4.65	0.06		5	3.6	0.92
[16034]	INTRAPLATE VOLCANICS	ANATOLIA-IRAN BELT - CENOZOIC/QUATERNARY / ANATOLIA / WESTERN ANATOLIAN VOLCANIC BELT	BUCAK, 50 KM SOUTH OF ISPARTA, ISPARTA ANGLE REGION	31.0833	31.0833	37.8167	37.8167	SUBAERIAL			s 05 BSS 03 [16034]	LAMPROITE [16034]				NEOGENE [16034]	Collision	10.0206	0.167976	0.0170067	17.4176	1.17195	4.99824		VOLCANIC ROCK					WHOLE_ROCK [16034]	48.95	1.75		10.52				6.27	8.12	10.23	0.11		7.02	2.34	1.61
[16034]	INTRAPLATE VOLCANICS	ANATOLIA-IRAN BELT - CENOZOIC/QUATERNARY / ANATOLIA / WESTERN ANATOLIAN VOLCANIC BELT	BUCAK, 50 KM SOUTH OF ISPARTA, ISPARTA ANGLE REGION	31.0833	31.0833	37.8167	37.8167	SUBAERIAL			s 05 BSS 02 [16034]	LAMPROITE [16034]				NEOGENE [16034]	Collision	10.6816	0.163605	0.0163592	14.9751	1.56932	6.18534		VOLCANIC ROCK					WHOLE_ROCK [16034]	49.22	1.75		10.5				6.15	8.04	10.06	0.11		7.17	2.18	1.4
[15825]	INTRAPLATE VOLCANICS	ANATOLIA-IRAN BELT - CENOZOIC/QUATERNARY / ANATOLIA / EASTERN ANATOLIAN VOLCANIC BELT / KARACA(LI)DAG		39	40.5	37	38	SUBAERIAL	1047	1047	s 3MO 83 [15825]	BASANITE [15825]	1000000 [15825]	1900000 [15825]		NEOGENE [15825]	Collision	5.23077	0.0820265	0.0135135	6.55006	0.240602		AMPH-BEARING LAVAS [15825]	VOLCANIC ROCK					WHOLE_ROCK [15825]	45.12	3.24		13.97				13.07	8.12	6.17	0.22		2.58	5	1.06
[15825]	INTRAPLATE VOLCANICS	ANATOLIA-IRAN BELT - CENOZOIC/QUATERNARY / ANATOLIA / EASTERN ANATOLIAN VOLCANIC BELT / KARACA(LI)DAG		39	40.5	37	38	SUBAERIAL	1666	1666	s 3MO 89 [15825]	BASANITE [15825]	1000000 [15825]	1900000 [15825]		NEOGENE [15825]	Collision	5.16667	0.0786802	0.0127273	5.74873	0.2		OL-PHYRIC LAVAS [15825]	VOLCANIC ROCK					WHOLE_ROCK [15825]	45.13	3.25		14.46				12.57	7.9	5.96	0.26		2.73	5.42	0.91
[16034]	INTRAPLATE VOLCANICS	ANATOLIA-IRAN BELT - CENOZOIC/QUATERNARY / ANATOLIA / WESTERN ANATOLIAN VOLCANIC BELT	BUCAK, 50 KM SOUTH OF ISPARTA, ISPARTA ANGLE REGION	31.0833	31.0833	37.8167	37.8167	SUBAERIAL			s 06 BSS15 [16034]	LAMPROITE [16034]				NEOGENE [16034]	Collision	12.8836	0.152279	0.0103257	8.26143	2.33841	5.70646		VOLCANIC ROCK					WHOLE_ROCK [16034]	49.07	1.97		8.74				6.57	7.44	12.73	0.1		7.28	1.92	1.14
[16034]	INTRAPLATE VOLCANICS	ANATOLIA-IRAN BELT - CENOZOIC/QUATERNARY / ANATOLIA / WESTERN ANATOLIAN VOLCANIC BELT	BUCAK, 50 KM SOUTH OF ISPARTA, ISPARTA ANGLE REGION	31.0833	31.0833	37.8167	37.8167	SUBAERIAL			s 06 BSS14 [16034]	LAMPROITE [16034]				NEOGENE [16034]	Collision	13.934	0.151191	0.0102155	10.7013	1.04296	5.7041		VOLCANIC ROCK					WHOLE_ROCK [16034]	48.37	1.9		8.57				6.33	8.17	12.75	0.1		7.94	1.79	1.82
[21240]	INTRAPLATE VOLCANICS	ANATOLIA-IRAN BELT - CENOZOIC/QUATERNARY / ARMENIA / ZANGEZUR BLOCK / MEGHRI-ORDUBAD PLUTON		46.1403	46.1403	39.1473	39.1473	SAE			s_KJ1508 [21240]	GABBRO [21240]				CENOZOIC [21240]	Collision		0.119718		17.0387	12.6744			PLU			S		WR [21240]	47.48	0.97		18.27				9.25005	10.45	5.97	0.15		1.02	2.9	0.56
[15179]	INTRAPLATE VOLCANICS	ANATOLIA-IRAN BELT - CENOZOIC/QUATERNARY / IRAN / KELBAJAR TROUGH		46	46	40.1	40.1	SAE			s_13/3-V [15179]	GABBRO [15179]				NEOGENE [15179]	Collision				17.2414	1.17857			PLU					WR [15179]	51.41	1.45		18.73		5.97	1.59		9.58	4.89	0.12		1.61	4.11	0.4
[12131]	INTRAPLATE VOLCANICS	CARPATHIAN BELT AND PANNONIAN BASIN / EASTERN ALPINE-WESTERN CARPATHIAN-NORTHERN PANNONI / CALIMANI-GURGHIU HARGHITA MOUNTAINS / CALIMANI MOUNTAINS	NEGOIUL UNGURESE HILL, ROMANIA	25.5	25.5	48	48	SAE			s_43P [12131]	GABBRO [12131]				NEOGENE [12131]	Collision								PLU					WR [12131]	49.89	1.03		19.14		3.71	5.16		9.71	6.47	0.15		1.15	2.7	1.16		0.57
[12131]	INTRAPLATE VOLCANICS	CARPATHIAN BELT AND PANNONIAN BASIN / EASTERN ALPINE-WESTERN CARPATHIAN-NORTHERN PANNONI / CALIMANI-GURGHIU HARGHITA MOUNTAINS / HARGHITA MOUNTAINS	HAITII VALLEY, ROMANIA	25.5	25.5	48	48	SAE			s_2430 [12131]	GABBRO [12131]				NEOGENE [12131]	Collision								PLU					WR [12131]	49.81	1.12		18.67		6.44	3.02		9.61	4.04	0.13		1.39	2.82	0.21		2.43
[20770]	INTRAPLATE VOLCANICS	CARPATHIAN BELT AND PANNONIAN BASIN / SOUTHERN PANNONIAN-EASTERN CARPATHIAN (TISZA-DACIA / RODNA -BARGAU NEOVOLCANIC ZONE	ROMANIA	24.8	25	47	47.2	SAE			s_FLN24 [20770]	GABBRO, AMPHIBOLE [20770]				MIOCENE [20770]	Collision					8.14815			PLU					WR [20770]	54.2851	0.770925		18.9828				6.95	8.52022	4.35523	0.160192		1.69203	3.32399	0.180216
[19842][19851]	INTRAPLATE VOLCANICS	EUROPEAN OROGENIC BELT - CENOZOIC/QUATERNARY / FRANCE / PROVENCE	ESTEREL-AGAY	7	7	43	43	SAE			s_PR 6 [19842]	GABBRO, HORNBLENDE [19842]				NEOGENE [19842]	Collision		0.09375		5.90625	0.45			PLU					WR [19842]	48.01	2.98		16.02		1.61	9.65		9.41	7.34	0.27		0.51	3.59	0.62
[13417]	INTRAPLATE VOLCANICS	EUROPEAN OROGENIC BELT - CENOZOIC/QUATERNARY / SPAIN / VALENCIA TROUGH	FERRERA, COLUMBRETES ISLANDS	0.67	0.67	39.87	39.87	SAE			s_7449 [13417]	GABBRO [13417]	300000 [13417]	1000000 [13417]		PLEISTOCENE [13417]	Collision				40.6	0.448276			PLU					WR [13417]	52	2.8		14.58		9.94	1.68		7.98	3.53	0.29		0.74	4.29	1.32	0.55
[13417]	INTRAPLATE VOLCANICS	EUROPEAN OROGENIC BELT - CENOZOIC/QUATERNARY / SPAIN / VALENCIA TROUGH	FERRERA, COLUMBRETES ISLANDS	0.67	0.67	39.87	39.87	SAE			s_7455 [13417]	GABBRO [13417]	300000 [13417]	1000000 [13417]		PLEISTOCENE [13417]	Collision				37.3333	0.4375			PLU					WR [13417]	52	2.52		16.12		8.14	1.36		7.26	4.15	0.21		1.52	4.72	1.11	0.55
[13417]	INTRAPLATE VOLCANICS	EUROPEAN OROGENIC BELT - CENOZOIC/QUATERNARY / SPAIN / VALENCIA TROUGH	FORADADA, COLUMBRETES ISLANDS	0.67	0.67	39.87	39.87	SAE			s_7489 [13417]	GABBRO [13417]	300000 [13417]	1000000 [13417]		PLEISTOCENE [13417]	Collision				27	0.47191			PLU					WR [13417]	40.69	3.97		12.27		16.06	1.95		8.92	6.85	0.32		1.84	3.49	1.6	1.78
[13417]	INTRAPLATE VOLCANICS	EUROPEAN OROGENIC BELT - CENOZOIC/QUATERNARY / SPAIN / VALENCIA TROUGH	FORADADA, COLUMBRETES ISLANDS	0.67	0.67	39.87	39.87	SAE			s_7484 [13417]	GABBRO [13417]	300000 [13417]	1000000 [13417]		PLEISTOCENE [13417]	Collision				49	0.666667			PLU					WR [13417]	50	0.59		20.92		2.74	1.21		13.03	6.85	0.07		0.82	3.16	0.16	0.14
[10761]	INTRAPLATE VOLCANICS	ANATOLIA-IRAN BELT - CENOZOIC/QUATERNARY / ANATOLIA / WESTERN ANATOLIAN VOLCANIC BELT	SÖKE	27.41	27.41	37.75	37.75	SUBAERIAL			s 22 [10761]	TRACHYANDESITE [10761]				CENOZOIC [10761]	Collision		0.333333		15.1717	5.3125			VOLCANIC ROCK					WHOLE_ROCK [10761]	57.52	0.72		15.31		6.11			7.93	3.54	0.09		3.23	3.01	0.25
[10761]	INTRAPLATE VOLCANICS	ANATOLIA-IRAN BELT - CENOZOIC/QUATERNARY / ANATOLIA / WESTERN ANATOLIAN VOLCANIC BELT	AYVALIK	26.6952	26.6952	39.3208	39.3208	SUBAERIAL			s 3 [10761]	TRACHYANDESITE [10761]				CENOZOIC [10761]	Collision		0.433333		14.7167	9.61538			VOLCANIC ROCK					WHOLE_ROCK [10761]	57.32	0.68		16.59		6.4			6.33	2.64	0.14		3.75	3.18	0.2
[10761]	INTRAPLATE VOLCANICS	ANATOLIA-IRAN BELT - CENOZOIC/QUATERNARY / ANATOLIA / WESTERN ANATOLIAN VOLCANIC BELT / KULA VOLCANIC FIELD	KULA	28.65	28.65	38.54	38.54	SUBAERIAL			s 18 [10761]	BASALT [10761]				CENOZOIC [10761]	Collision		0.176471		11.1471	1.16418			VOLCANIC ROCK					WHOLE_ROCK [10761]	47.13	2.24		18.07		9.04			8.39	4.42	0.16		3.21	4.78	0.85
[10761]	INTRAPLATE VOLCANICS	ANATOLIA-IRAN BELT - CENOZOIC/QUATERNARY / ANATOLIA / WESTERN ANATOLIAN VOLCANIC BELT / KULA VOLCANIC FIELD	KULA	28.65	28.65	38.54	38.54	SUBAERIAL			s 19 [10761]	BASALT [10761]				CENOZOIC [10761]	Collision		0.144444		10.3333	0.91954			VOLCANIC ROCK					WHOLE_ROCK [10761]	46.36	1.97		17.91		8.46			8.1	5.6	0.17		3.77	5.91	0.93
[10761]	INTRAPLATE VOLCANICS	ANATOLIA-IRAN BELT - CENOZOIC/QUATERNARY / ANATOLIA / WESTERN ANATOLIAN VOLCANIC BELT / KULA VOLCANIC FIELD	KULA	28.65	28.65	38.54	38.54	SUBAERIAL			s 17 [10761]	BASALT [10761]				CENOZOIC [10761]	Collision		0.140845		12.6338	0.897727			VOLCANIC ROCK					WHOLE_ROCK [10761]	46.1	2.05		17.78		8.75			8.31	5.77	0.17		3.82	5.4	1.03
[10791]	INTRAPLATE VOLCANICS	ANATOLIA-IRAN BELT - CENOZOIC/QUATERNARY / ANATOLIA / EASTERN ANATOLIAN VOLCANIC BELT / NEMRUT		42.2	42.2	38.67	38.67	SUBAERIAL			s PL55 [10791]	TRACHYANDESITE [10791]			UPPER [10791]	CENOZOIC [10791]	Collision					2.42308			VOLCANIC ROCK					WHOLE_ROCK [10791]	52.9	2.6		16.34				9.48	7.26	3.42	0.21		2.32	4.86	0.86
[10791]	INTRAPLATE VOLCANICS	ANATOLIA-IRAN BELT - CENOZOIC/QUATERNARY / ANATOLIA / EASTERN ANATOLIAN VOLCANIC BELT / TENDUREK		44	44	39.2	39.2	SUBAERIAL			s PL79 [10791]	TRACHYANDESITE [10791]			UPPER [10791]	CENOZOIC [10791]	Collision					0.7			VOLCANIC ROCK					WHOLE_ROCK [10791]	52.9	1.72		17.76				9.07	6.84	3.56	0.18		1.7	4.88	0.73
[10791]	INTRAPLATE VOLCANICS	ANATOLIA-IRAN BELT - CENOZOIC/QUATERNARY / ANATOLIA / EASTERN ANATOLIAN VOLCANIC BELT / NEMRUT		42.2	42.2	38.67	38.67	SUBAERIAL			s PL54 [10791]	TRACHYANDESITE [10791]			UPPER [10791]	CENOZOIC [10791]	Collision					2.64			VOLCANIC ROCK					WHOLE_ROCK [10791]	52.7	2.44		16.3				9.54	7.42	3.44	0.21		2.44	4.54	0.91
[10791]	INTRAPLATE VOLCANICS	ANATOLIA-IRAN BELT - CENOZOIC/QUATERNARY / ANATOLIA / EASTERN ANATOLIAN VOLCANIC BELT / SUPHAN DAG		42.98	42.98	38.92	38.92	SUBAERIAL			s PL68 [10791]	TRACHYANDESITE [10791]			UPPER [10791]	CENOZOIC [10791]	Collision					0.611111			VOLCANIC ROCK					WHOLE_ROCK [10791]	51.5	2.08		17.9				10.08	6.7	4.2	0.21		1.58	4.96	0.99
[10791]	INTRAPLATE VOLCANICS	ANATOLIA-IRAN BELT - CENOZOIC/QUATERNARY / ANATOLIA / EASTERN ANATOLIAN VOLCANIC BELT / SUPHAN DAG		42.98	42.98	38.92	38.92	SUBAERIAL			s PL70 [10791]	TRACHYANDESITE [10791]			UPPER [10791]	CENOZOIC [10791]	Collision					1.2069			VOLCANIC ROCK					WHOLE_ROCK [10791]	51.5	1.71		18.44				9.3	7.64	3.8	0.18		1.84	4.98	0.77
[10791]	INTRAPLATE VOLCANICS	ANATOLIA-IRAN BELT - CENOZOIC/QUATERNARY / ANATOLIA / EASTERN ANATOLIAN VOLCANIC BELT / TENDUREK		44	44	39.2	39.2	SUBAERIAL			s PL81 [10791]	TRACHYANDESITE [10791]			UPPER [10791]	CENOZOIC [10791]	Collision					0.657143			VOLCANIC ROCK					WHOLE_ROCK [10791]	51.4	2.54		17.48				10.02	6.52	4.28	0.21		1.62	4.98	0.89
[10791]	INTRAPLATE VOLCANICS	ANATOLIA-IRAN BELT - CENOZOIC/QUATERNARY / ANATOLIA / EASTERN ANATOLIAN VOLCANIC BELT / TENDUREK		44	44	39.2	39.2	SUBAERIAL			s PL75 [10791]	BASALT [10791]			UPPER [10791]	CENOZOIC [10791]	Collision					1.33333			VOLCANIC ROCK					WHOLE_ROCK [10791]	49.1	1.98		16.94				10.38	9.2	5.98	0.18		0.94	3.9	0.41
[10791]	INTRAPLATE VOLCANICS	ANATOLIA-IRAN BELT - CENOZOIC/QUATERNARY / ANATOLIA / EASTERN ANATOLIAN VOLCANIC BELT / SUPHAN DAG		42.98	42.98	38.92	38.92	SUBAERIAL			s PL2/8 [10791]	TRACHYBASALT [10791]			UPPER [10791]	CENOZOIC [10791]	Collision					1.70968			VOLCANIC ROCK					WHOLE_ROCK [10791]	49	3.43		15.32				12.15	7.58	3.78	0.24		2.2	4.04	1.37
[10791]	INTRAPLATE VOLCANICS	ANATOLIA-IRAN BELT - CENOZOIC/QUATERNARY / ANATOLIA / EASTERN ANATOLIAN VOLCANIC BELT / NEMRUT		42.2	42.2	38.67	38.67	SUBAERIAL			s PL52 [10791]	BASALT [10791]			UPPER [10791]	CENOZOIC [10791]	Collision					2.5			VOLCANIC ROCK					WHOLE_ROCK [10791]	48.9	2		16.6				11.41	9.02	6	0.18		1.4	3.16	0.36
[10791]	INTRAPLATE VOLCANICS	ANATOLIA-IRAN BELT - CENOZOIC/QUATERNARY / ANATOLIA / EASTERN ANATOLIAN VOLCANIC BELT / MOUNT DUMLU / ARZUTU FORMATION	KARS PLATEAU	41.3	41.5	40	40.2	SUBAERIAL			s PL87 [10791]	TRACHYBASALT [10791]			UPPER [10791]	CENOZOIC [10791]	Collision					1.16667			VOLCANIC ROCK					WHOLE_ROCK [10791]	48.4	3.05		16.92				12.27	7.68	5.34	0.19		1.02	4.22	0.4
[10791]	INTRAPLATE VOLCANICS	ANATOLIA-IRAN BELT - CENOZOIC/QUATERNARY / ANATOLIA / EASTERN ANATOLIAN VOLCANIC BELT / MOUNT DUMLU / ARZUTU FORMATION	KARS PLATEAU	41.3	41.5	40	40.2	SUBAERIAL			s PL89 [10791]	BASALT [10791]			UPPER [10791]	CENOZOIC [10791]	Collision					1.08333			VOLCANIC ROCK					WHOLE_ROCK [10791]	47.9	2.9		16.76				12.13	7.82	5.34	0.19		0.98	4.04	0.38
[10791]	INTRAPLATE VOLCANICS	ANATOLIA-IRAN BELT - CENOZOIC/QUATERNARY / ANATOLIA / EASTERN ANATOLIAN VOLCANIC BELT / MOUNT DUMLU / ARZUTU FORMATION	KARS PLATEAU	41.3	41.5	40	40.2	SUBAERIAL			s PL88 [10791]	BASALT [10791]			UPPER [10791]	CENOZOIC [10791]	Collision					1.09091			VOLCANIC ROCK					WHOLE_ROCK [10791]	47.5	2.47		17.36				11.95	7.96	5.1	0.18		0.94	4	0.38
[10791]	INTRAPLATE VOLCANICS	ANATOLIA-IRAN BELT - CENOZOIC/QUATERNARY / ANATOLIA / EASTERN ANATOLIAN VOLCANIC BELT / KARACA(LI)DAG	FROM 20 KM SW OF SIVEREK TO NORTHERN MARGIN OF THE VOLCANIC COMPLEX AT DIYARBAKIR	39.83	39.83	37.67	37.67	SUBAERIAL			s PL2/3 [10791]	BASALT [10791]			UPPER [10791]	CENOZOIC [10791]	Collision					0.4			VOLCANIC ROCK					WHOLE_ROCK [10791]	47.3	2.83		15.48				12.29	9.68	5.7	0.17		1.02	3.34	0.46
[10791]	INTRAPLATE VOLCANICS	ANATOLIA-IRAN BELT - CENOZOIC/QUATERNARY / ANATOLIA / EASTERN ANATOLIAN VOLCANIC BELT / ARARAT		44.4	44.4	39.75	39.75	SUBAERIAL			s PL83 [10791]	TRACHYBASALT [10791]			UPPER [10791]	CENOZOIC [10791]	Collision					1.33333			VOLCANIC ROCK					WHOLE_ROCK [10791]	47.2	2.44		17.04				12.38	9.22	4.7	0.19		1.48	4.88	0.54
[10791]	INTRAPLATE VOLCANICS	ANATOLIA-IRAN BELT - CENOZOIC/QUATERNARY / ANATOLIA / EASTERN ANATOLIAN VOLCANIC BELT / KARACA(LI)DAG	FROM 20 KM SW OF SIVEREK TO NORTHERN MARGIN OF THE VOLCANIC COMPLEX AT DIYARBAKIR	39.83	39.83	37.67	37.67	SUBAERIAL			s PL66 [10791]	BASALT [10791]			UPPER [10791]	CENOZOIC [10791]	Collision					0.391304			VOLCANIC ROCK					WHOLE_ROCK [10791]	46.9	2.46		13.24				11.88	8.44	9.24	0.16		0.88	3.64	0.3
[10791]	INTRAPLATE VOLCANICS	ANATOLIA-IRAN BELT - CENOZOIC/QUATERNARY / ANATOLIA / EASTERN ANATOLIAN VOLCANIC BELT / KARACA(LI)DAG	FROM 20 KM SW OF SIVEREK TO NORTHERN MARGIN OF THE VOLCANIC COMPLEX AT DIYARBAKIR	39.83	39.83	37.67	37.67	SUBAERIAL			s PL2/2 [10791]	BASALT [10791]			UPPER [10791]	CENOZOIC [10791]	Collision					0.571429			VOLCANIC ROCK					WHOLE_ROCK [10791]	46.3	1.84		15.16				11.3	10.28	6.38	0.16		0.68	3	0.3
[10791]	INTRAPLATE VOLCANICS	ANATOLIA-IRAN BELT - CENOZOIC/QUATERNARY / ANATOLIA / EASTERN ANATOLIAN VOLCANIC BELT / KARACA(LI)DAG	FROM 20 KM SW OF SIVEREK TO NORTHERN MARGIN OF THE VOLCANIC COMPLEX AT DIYARBAKIR	39.83	39.83	37.67	37.67	SUBAERIAL			s PL2/4 [10791]	BASALT [10791]			UPPER [10791]	CENOZOIC [10791]	Collision					0.363636			VOLCANIC ROCK					WHOLE_ROCK [10791]	46	2.88		15.42				12.67	10.7	5.64	0.17		0.78	3.1	0.47
[10791]	INTRAPLATE VOLCANICS	ANATOLIA-IRAN BELT - CENOZOIC/QUATERNARY / ANATOLIA / EASTERN ANATOLIAN VOLCANIC BELT / KARACA(LI)DAG	FROM 20 KM SW OF SIVEREK TO NORTHERN MARGIN OF THE VOLCANIC COMPLEX AT DIYARBAKIR	39.83	39.83	37.67	37.67	SUBAERIAL			s PL2/5 [10791]	BASALT [10791]			UPPER [10791]	CENOZOIC [10791]	Collision					0.351351			VOLCANIC ROCK					WHOLE_ROCK [10791]	45.6	3.44		13.36				12.92	8.6	9.38	0.18		1.44	3.14	0.61
[10791]	INTRAPLATE VOLCANICS	ANATOLIA-IRAN BELT - CENOZOIC/QUATERNARY / ANATOLIA / EASTERN ANATOLIAN VOLCANIC BELT / KARACA(LI)DAG	FROM 20 KM SW OF SIVEREK TO NORTHERN MARGIN OF THE VOLCANIC COMPLEX AT DIYARBAKIR	39.83	39.83	37.67	37.67	SUBAERIAL			s PL67 [10791]	BASALT [10791]			UPPER [10791]	CENOZOIC [10791]	Collision					0.425			VOLCANIC ROCK					WHOLE_ROCK [10791]	45.4	2.88		14.44				12.96	9.1	8.9	0.18		1.44	3.66	0.51
[13554]	INTRAPLATE VOLCANICS	ANATOLIA-IRAN BELT - CENOZOIC/QUATERNARY / ANATOLIA / WESTERN ANATOLIAN VOLCANIC BELT / KIZDERBENT VOLCANIC ASSOCIATION	ARMUTLU PENINSULA	28.83	28.83	40.52	40.52	SUBAERIAL			s KY21 [13554]	BASALT [13554]			MIDDLE [13554]	EOCENE [13554]	Collision		0.333333		7.27778	8			VOLCANIC ROCK					WHOLE_ROCK [13554]	51.26	1.3		18.42				9.74	8.65	4.92	0.18		0.49	3.59	0.19
[13554]	INTRAPLATE VOLCANICS	ANATOLIA-IRAN BELT - CENOZOIC/QUATERNARY / ANATOLIA / WESTERN ANATOLIAN VOLCANIC BELT / KIZDERBENT VOLCANIC ASSOCIATION	ARMUTLU PENINSULA	28.83	28.83	40.52	40.52	SUBAERIAL			s KY19 [13554]	BASALT [13554]			MIDDLE [13554]	EOCENE [13554]	Collision		0.208333		6	10			VOLCANIC ROCK					WHOLE_ROCK [13554]	50.07	1.6		16.49				10.28	9.27	5.73	0.19		0.72	3.25	0.29
[13554]	INTRAPLATE VOLCANICS	ANATOLIA-IRAN BELT - CENOZOIC/QUATERNARY / ANATOLIA / WESTERN ANATOLIAN VOLCANIC BELT / KIZDERBENT VOLCANIC ASSOCIATION	ARMUTLU PENINSULA	28.83	28.83	40.52	40.52	SUBAERIAL			s KY63 [13554]	BASALT [13554]			MIDDLE [13554]	EOCENE [13554]	Collision		0.272727		8.18182	15			VOLCANIC ROCK					WHOLE_ROCK [13554]	49.45	2.13		16.43				11.81	7.79	4.35	0.16		1.08	3.43	0.39
[13554]	INTRAPLATE VOLCANICS	ANATOLIA-IRAN BELT - CENOZOIC/QUATERNARY / ANATOLIA / WESTERN ANATOLIAN VOLCANIC BELT / KIZDERBENT VOLCANIC ASSOCIATION	ARMUTLU PENINSULA	28.83	28.83	40.52	40.52	SUBAERIAL			s KY23 [13554]	BASALT [13554]			MIDDLE [13554]	EOCENE [13554]	Collision		0.5		13.5833	2.66667			VOLCANIC ROCK					WHOLE_ROCK [13554]	48.11	1.7		17.37				9.83	9.03	3.46	0.18		0.64	3.74	0.48
[18505]	INTRAPLATE VOLCANICS	ANATOLIA-IRAN BELT - CENOZOIC/QUATERNARY / ANATOLIA / EASTERN PONTIDES		39	39.7	40.8	41.5	SUBAERIAL			s 659 [18505]	BASALT [18505]				EOCENE [18505]	Collision		0.331797		25.0691	15.8302			VOLCANIC ROCK					WHOLE_ROCK [18505]	49.49	0.84		21.12				7.32	9.95	2.82	0.15		3.62	2.37	0.44
[9443]	INTRAPLATE VOLCANICS	ANATOLIA-IRAN BELT - CENOZOIC/QUATERNARY / ANATOLIA / EASTERN ANATOLIAN VOLCANIC BELT / BERIT VOLCANOSEDIMENTARY UNIT	BERIT AREA	36.9	36.9	38	38	SUBAERIAL			s T/02/79 [9443]	BASALT [9443]				EOCENE [9443]	Collision				4.9	0.333333			VOLCANIC ROCK					WHOLE_ROCK [9443]	50.4	1.11		16.26				8.85	7.03	7.72	0.7		0.15	4.84	0.22
[10535]	INTRAPLATE VOLCANICS	ANATOLIA-IRAN BELT - CENOZOIC/QUATERNARY / ANATOLIA / EASTERN ANATOLIAN VOLCANIC BELT	KÖPRUAGZI, KAHRAMAN MARAS AREA	37.02	37.02	37.35	37.35	SUBAERIAL			s T [10535]	ANDESITE, BASALTIC [10535]				MIOCENE [10535]	Collision		0.343434		18.2828	1.90476			VOLCANIC ROCK					WHOLE_ROCK [10535]	52.79	1.549		14.67				10.19	7.84	6.7	0.129		0.94	3.23	0.184
[10535]	INTRAPLATE VOLCANICS	ANATOLIA-IRAN BELT - CENOZOIC/QUATERNARY / ANATOLIA / EASTERN ANATOLIAN VOLCANIC BELT	CINARLI, KAHRAMAN MARAS AREA	37.08	37.08	37.45	37.45	SUBAERIAL			s K1 [10535]	ANDESITE, BASALTIC [10535]				MIOCENE [10535]	Collision		0.179487		24.5165	1.125			VOLCANIC ROCK					WHOLE_ROCK [10535]	52.4	1.778		14.42				10.05	7.37	6.5	0.289		1.18	3.44	0.285
[10751]	INTRAPLATE VOLCANICS	ANATOLIA-IRAN BELT - CENOZOIC/QUATERNARY / ANATOLIA / CENTRAL ANATOLIAN VOLCANIC BELT / GALATEAN VOLCANIC MASSIF / SABUNCUKAYA BASALT	GÜVEM	32.6	32.6	40.5	40.5	SUBAERIAL			s TY 526 [10751]	BASALT [10751]	9500000 [10751]	9500000 [10751]	UPPER [10751]	MIOCENE [10751]	Collision					0.891304			VOLCANIC ROCK					WHOLE_ROCK [10751]	47.91	1.72		17.3				7.68	9.41	6.35	0.16		2.29	4.13	0.54
[10751]	INTRAPLATE VOLCANICS	ANATOLIA-IRAN BELT - CENOZOIC/QUATERNARY / ANATOLIA / CENTRAL ANATOLIAN VOLCANIC BELT / GALATEAN VOLCANIC MASSIF / SABUNCUKAYA BASALT	GÜVEM	32.6	32.6	40.5	40.5	SUBAERIAL			s TY 486 [10751]	BASALT [10751]	9500000 [10751]	9500000 [10751]	UPPER [10751]	MIOCENE [10751]	Collision	4.36893	0.36		20.6	1.12766			VOLCANIC ROCK					WHOLE_ROCK [10751]	47.44	1.66		16.87				7.95	9.27	6.64	0.17		2.43	4.01	0.54
[10752]	INTRAPLATE VOLCANICS	ANATOLIA-IRAN BELT - CENOZOIC/QUATERNARY / ANATOLIA / EASTERN ANATOLIAN VOLCANIC BELT / YAMADAG / SUSUZDAG VOLCANICS	NORTH OF HASANCELEBI, NW MALATYA	37.89	37.89	38.95	38.95	SUBAERIAL			s AU-136 [10752]	ANDESITE, BASALTIC [10752]			UPPER [10752]	MIOCENE [10752]	Collision				11.7881	3.2			VOLCANIC ROCK					WHOLE_ROCK [10752]	52.51	1.68		16.33				8.27	6.59	6.2	0.12		1.77	4.35	0.43
[10752]	INTRAPLATE VOLCANICS	ANATOLIA-IRAN BELT - CENOZOIC/QUATERNARY / ANATOLIA / EASTERN ANATOLIAN VOLCANIC BELT / YAMADAG / SUSUZDAG VOLCANICS	NORTH OF HASANCELEBI, NW MALATYA	37.89	37.89	38.95	38.95	SUBAERIAL			s AU-39 [10752]	ANDESITE, BASALTIC [10752]			UPPER [10752]	MIOCENE [10752]	Collision					3.4			VOLCANIC ROCK					WHOLE_ROCK [10752]	52.13	1.62		16.26				7.97	6.54	5.98	0.13		1.78	3.92	0.42
[10752]	INTRAPLATE VOLCANICS	ANATOLIA-IRAN BELT - CENOZOIC/QUATERNARY / ANATOLIA / EASTERN ANATOLIAN VOLCANIC BELT / YAMADAG / SUSUZDAG VOLCANICS	NORTH OF HASANCELEBI, NW MALATYA	37.89	37.89	38.95	38.95	SUBAERIAL			s AU-130 [10752]	ANDESITE, BASALTIC [10752]			UPPER [10752]	MIOCENE [10752]	Collision					2.77778			VOLCANIC ROCK					WHOLE_ROCK [10752]	52.1	1.66		16.3				8.07	6.5	5.86	0.13		1.77	4.03	0.42
[10752]	INTRAPLATE VOLCANICS	ANATOLIA-IRAN BELT - CENOZOIC/QUATERNARY / ANATOLIA / EASTERN ANATOLIAN VOLCANIC BELT / YAMADAG / SUSUZDAG VOLCANICS	NORTH OF HASANCELEBI, NW MALATYA	37.89	37.89	38.95	38.95	SUBAERIAL			s AU-87 [10752]	BASALT [10752]			UPPER [10752]	MIOCENE [10752]	Collision					1.19048			VOLCANIC ROCK					WHOLE_ROCK [10752]	51.9	2.04		16.48				9.46	6.57	4.7	0.14		1.36	4.41	0.43
[10752]	INTRAPLATE VOLCANICS	ANATOLIA-IRAN BELT - CENOZOIC/QUATERNARY / ANATOLIA / EASTERN ANATOLIAN VOLCANIC BELT / YAMADAG / SUSUZDAG VOLCANICS	NORTH OF HASANCELEBI, NW MALATYA	37.89	37.89	38.95	38.95	SUBAERIAL			s AU-03 [10752]	BASALT [10752]			UPPER [10752]	MIOCENE [10752]	Collision					3			VOLCANIC ROCK					WHOLE_ROCK [10752]	51.09	1.34		16.4				8.22	6.62	6.27	0.13		1.48	4.03	0.36
[10804]	INTRAPLATE VOLCANICS	ANATOLIA-IRAN BELT - CENOZOIC/QUATERNARY / ANATOLIA / CENTRAL ANATOLIAN VOLCANIC BELT / GALATEAN VOLCANIC MASSIF		32.8	32.8	40.3	40.3	SUBAERIAL			s S5A [10804]	BASALT, ALKALINE [10804]			LOWER [10804]	MIOCENE [10804]	Collision		0.0294118		16.7059	1.22222			VOLCANIC ROCK					WHOLE_ROCK [10804]	50.01	2.06		18.26				9.52	8.89	2.61	0.1		1.96	3.52	0.78
[7662][8000]	INTRAPLATE VOLCANICS	ANATOLIA-IRAN BELT - CENOZOIC/QUATERNARY / ANATOLIA / WESTERN ANATOLIAN VOLCANIC BELT / GALATEAN VOLCANIC MASSIF	ÖZMUS	32.3	32.3	40.5	40.5	SUBAERIAL			s ÖZ11 [7662] / s ÖZM11 [8000]	BASALT, ALKALINE [7662]				MIOCENE [7662]	Collision	5.7377	0.261194		16.847	1.09375		HOLOCRYSTALLINE, LOW PORTION OF PHENOCRYSTS [8000]	VOLCANIC ROCK					WHOLE_ROCK [7662]	49.28	1.69		16.57				8.81	9.74	6.22	0.16		1.62	3.76	0.77
[7662][8000]	INTRAPLATE VOLCANICS	ANATOLIA-IRAN BELT - CENOZOIC/QUATERNARY / ANATOLIA / WESTERN ANATOLIAN VOLCANIC BELT / GALATEAN VOLCANIC MASSIF	ÖZMUS	32.3	32.3	40.5	40.5	SUBAERIAL			s ÖZ10 [7662] / s ÖZM10 [8000]	BASALT, ALKALINE [7662]				MIOCENE [7662]	Collision					1.10345		HOLOCRYSTALLINE, LOW PORTION OF PHENOCRYSTS [8000]	VOLCANIC ROCK					WHOLE_ROCK [7662]	48.42	1.66		16.26				8.77	9.67	8.01	0.16		0.97	3.65	0.73
[7662][8000]	INTRAPLATE VOLCANICS	ANATOLIA-IRAN BELT - CENOZOIC/QUATERNARY / ANATOLIA / CENTRAL ANATOLIAN VOLCANIC BELT / GALATEAN VOLCANIC MASSIF	GÜVEM	32.6	32.6	40.5	40.5	SUBAERIAL			s GÜV526 [7662]	BASALT, ALKALINE [7662]				MIOCENE [7662]	Collision					0.891304		HOLOCRYSTALLINE, LOW PORTION OF PHENOCRYSTS [8000]	VOLCANIC ROCK					WHOLE_ROCK [7662]	47.91	1.72		17.3				7.68	9.41	6.35	0.16		2.29	4.13	0.54
[7662][8000]	INTRAPLATE VOLCANICS	ANATOLIA-IRAN BELT - CENOZOIC/QUATERNARY / ANATOLIA / CENTRAL ANATOLIAN VOLCANIC BELT / GALATEAN VOLCANIC MASSIF	GÜVEM	32.6	32.6	40.5	40.5	SUBAERIAL			s GÜV486 [7662]	BASALT, ALKALINE [7662]				MIOCENE [7662]	Collision	4.36893	0.36		20.6	0.893617		HOLOCRYSTALLINE, LOW PORTION OF PHENOCRYSTS [8000]	VOLCANIC ROCK					WHOLE_ROCK [7662]	47.44	1.66		16.87				7.95	9.27	6.64	0.17		2.43	4.01	0.54
[7662][8000]	INTRAPLATE VOLCANICS	ANATOLIA-IRAN BELT - CENOZOIC/QUATERNARY / ANATOLIA / CENTRAL ANATOLIAN VOLCANIC BELT / GALATEAN VOLCANIC MASSIF	ORTA	32.8	32.8	40.6	40.6	SUBAERIAL			s ORTA29 [7662]	BASALT, ALKALINE [7662]				MIOCENE [7662]	Collision	3.30189	0.215385		19.6923	1.42857		HOLOCRYSTALLINE, LOW PORTION OF PHENOCRYSTS [8000]	VOLCANIC ROCK					WHOLE_ROCK [7662]	47.35	1.51		16.36				8	10.38	7.03	0.13		1.9	4.06	0.63
[8739]	INTRAPLATE VOLCANICS	ANATOLIA-IRAN BELT - CENOZOIC/QUATERNARY / ANATOLIA / WESTERN ANATOLIAN VOLCANIC BELT / YUNTDAGI / FOCA ALKALINE VOLCANICS	DUMANLIDAG	27.1333	27.1333	38.7167	38.7167	SUBAERIAL			s 1043 [8739]	TRACHYANDESITE, BASALTIC [8739]				MIOCENE [8739]	Collision		0.342105		10.6168	4.83929			VOLCANIC ROCK					WHOLE_ROCK [8739]	51.85	0.981		15.73				6.76	7.69	6.41	0.147		3.373	3.69	0.306
[10826]	INTRAPLATE VOLCANICS	ANATOLIA-IRAN BELT - CENOZOIC/QUATERNARY / ANATOLIA / EASTERN ANATOLIAN VOLCANIC BELT / KARACA(LI)DAG	DIYARBAKIR AREA	40.21	40.21	37.92	37.92	SUBAERIAL			s 03TR62 [10826]	BASALT [10826]	72000 [10826]	2800000 [10826]		NEOGENE [10826]	Collision				14.65	0.5			VOLCANIC ROCK					WHOLE_ROCK [10826]	46.88	2.47		13.79				12.61	8.82	9.56	0.15		1.14	2.78	0.37
[10826]	INTRAPLATE VOLCANICS	ANATOLIA-IRAN BELT - CENOZOIC/QUATERNARY / ANATOLIA / EASTERN ANATOLIAN VOLCANIC BELT / KARACA(LI)DAG	DIYARBAKIR AREA	40.21	40.21	37.92	37.92	SUBAERIAL			s 03TR61 [10826]	BASALT [10826]	72000 [10826]	2800000 [10826]		NEOGENE [10826]	Collision				11.7857	0.28			VOLCANIC ROCK					WHOLE_ROCK [10826]	46.32	2.54		14.12				13.11	8.73	9.16	0.16		1.1	2.92	0.39
[15179]	INTRAPLATE VOLCANICS	ANATOLIA-IRAN BELT - CENOZOIC/QUATERNARY / LESSER CAUCASUS / KELBAJAR TROUGH		46	46	40.1	40.1	SUBAERIAL			s 13/3-V [15179]	GABBRO [15179]				NEOGENE [15179]	Collision				17.2414	1.17857			PLUTONIC ROCK					WHOLE_ROCK [15179]	51.41	1.45		18.73		5.97	1.59		9.58	4.89	0.12		1.61	4.11	0.4
[16034]	INTRAPLATE VOLCANICS	ANATOLIA-IRAN BELT - CENOZOIC/QUATERNARY / ANATOLIA / WESTERN ANATOLIAN VOLCANIC BELT	BALCIKHISAR, AFYON	30.5074	30.5074	38.4383	38.4383	SUBAERIAL			s 05 BH 03 [16034]	LAMPROITE [16034]				NEOGENE [16034]	Collision					4.61905			VOLCANIC ROCK					WHOLE_ROCK [16034]	51.92	0.96		16.64				5.79	8.32	4.05	0.13		4.65	3.72	0.59
[16034]	INTRAPLATE VOLCANICS	ANATOLIA-IRAN BELT - CENOZOIC/QUATERNARY / ANATOLIA / WESTERN ANATOLIAN VOLCANIC BELT	BUCAK, 50 KM SOUTH OF ISPARTA, ISPARTA ANGLE REGION	31.0833	31.0833	37.8167	37.8167	SUBAERIAL			s 06 BSS11 [16034]	LAMPROITE [16034]				NEOGENE [16034]	Collision					1.8843			VOLCANIC ROCK					WHOLE_ROCK [16034]	46.49	1.45		10.58				6.73	9.91	11.76	0.13		5.54	2.83	1.68
[16034]	INTRAPLATE VOLCANICS	ANATOLIA-IRAN BELT - CENOZOIC/QUATERNARY / ANATOLIA / WESTERN ANATOLIAN VOLCANIC BELT	BUCAK, 50 KM SOUTH OF ISPARTA, ISPARTA ANGLE REGION	31.0833	31.0833	37.8167	37.8167	SUBAERIAL			s 06 BSS12 [16034]	LAMPROITE [16034]				NEOGENE [16034]	Collision					1.65574			VOLCANIC ROCK					WHOLE_ROCK [16034]	45.91	1.46		10.54				6.75	10.28	11.9	0.12		5.39	2.55	1.79
[7599]	INTRAPLATE VOLCANICS	ANATOLIA-IRAN BELT - CENOZOIC/QUATERNARY / ANATOLIA / WESTERN ANATOLIAN VOLCANIC BELT	ISPARTA	31	31	38	38	SUBAERIAL			s ISP1 [7599]	TRACHYANDESITE [7599]				NEOGENE [7599]	Collision		0.35545		14.7014	3.10811			VOLCANIC ROCK					WHOLE_ROCK [7599]	54.56	0.65		17.8		3.33	1.5		6.16	3.18	0.1		5.99	4	0.64
[7599]	INTRAPLATE VOLCANICS	ANATOLIA-IRAN BELT - CENOZOIC/QUATERNARY / ANATOLIA / WESTERN ANATOLIAN VOLCANIC BELT / AFYON	KIRKA	30.2333	30.2333	38.7333	38.7333	SUBAERIAL			s K1 [7599]	TRACHYANDESITE [7599]				NEOGENE [7599]	Collision	10.4762	0.333333		18.7424	7.09091			VOLCANIC ROCK					WHOLE_ROCK [7599]	54.45	1.33		15.75		4.75	2.28		5.1	6.95	0.12		4.42	2.74	0.6
[7599]	INTRAPLATE VOLCANICS	ANATOLIA-IRAN BELT - CENOZOIC/QUATERNARY / ANATOLIA / WESTERN ANATOLIAN VOLCANIC BELT / AFYON		30.457	30.5044	38.38	38.4241	SUBAERIAL			s SH27/2 [7599]	TRACHYANDESITE, BASALTIC [7599]				NEOGENE [7599]	Collision		0.213873		18.7052	12.9459			VOLCANIC ROCK					WHOLE_ROCK [7599]	53.07	0.94		18.75		3.67	1.83		7.07	3.91	0.11		4.4	3.29	0.61
[7599]	INTRAPLATE VOLCANICS	ANATOLIA-IRAN BELT - CENOZOIC/QUATERNARY / ANATOLIA / WESTERN ANATOLIAN VOLCANIC BELT / AFYON		30.457	30.5044	38.38	38.4241	SUBAERIAL			s SH27/1 [7599]	TRACHYANDESITE, BASALTIC [7599]				NEOGENE [7599]	Collision		0.449664		19.349	6.42857			VOLCANIC ROCK					WHOLE_ROCK [7599]	52.63	0.91		18.46		4.12	1.26		7.27	4.28	0.12		4.77	3.34	0.57
[7998]	INTRAPLATE VOLCANICS	ANATOLIA-IRAN BELT - CENOZOIC/QUATERNARY / ANATOLIA / EASTERN ANATOLIAN VOLCANIC BELT	KIRIKHAN (HATAY), KARASU VALLEY	36.35	36.35	36.5	36.5	SUBAERIAL			s OP-46 [7998]	BASALT, OLIVINE [7998]				NEOGENE [7998]	Collision					1.04		MICROCRYSTALLINE MATRIX [7998]	VOLCANIC ROCK					WHOLE_ROCK [7998]	50.15	2.1		15.24	0.03			11.44	8.35	5.69	0.14	0.01	1.29	3.62	0.45
[7998]	INTRAPLATE VOLCANICS	ANATOLIA-IRAN BELT - CENOZOIC/QUATERNARY / ANATOLIA / EASTERN ANATOLIAN VOLCANIC BELT	KIRIKHAN (HATAY), KARASU VALLEY	36.35	36.35	36.5	36.5	SUBAERIAL			s OP-44 [7998]	BASALT, OLIVINE [7998]				NEOGENE [7998]	Collision					0.928571		MICROCRYSTALLINE MATRIX [7998]	VOLCANIC ROCK					WHOLE_ROCK [7998]	50.08	2.13		15.46	0.03			11.58	8.43	5.61	0.14	0.01	1.28	3.74	0.48
[7998]	INTRAPLATE VOLCANICS	ANATOLIA-IRAN BELT - CENOZOIC/QUATERNARY / ANATOLIA / EASTERN ANATOLIAN VOLCANIC BELT	KIRIKHAN (HATAY), KARASU VALLEY	36.35	36.35	36.5	36.5	SUBAERIAL			s OP-48 [7998]	BASALT, OLIVINE [7998]				NEOGENE [7998]	Collision					1		MICROCRYSTALLINE MATRIX [7998]	VOLCANIC ROCK					WHOLE_ROCK [7998]	49.64	2.11		15.39	0.02			11.33	8.69	5.21	0.14	0.01	1.26	3.64	0.45
[7998]	INTRAPLATE VOLCANICS	ANATOLIA-IRAN BELT - CENOZOIC/QUATERNARY / ANATOLIA / EASTERN ANATOLIAN VOLCANIC BELT	KIRIKHAN (HATAY), KARASU VALLEY	36.35	36.35	36.5	36.5	SUBAERIAL			s OP-49 [7998]	BASALT, OLIVINE [7998]				NEOGENE [7998]	Collision					0.933333		MICROCRYSTALLINE MATRIX [7998]	VOLCANIC ROCK					WHOLE_ROCK [7998]	49.42	1.88		14.73	0.04			11.26	8.76	6.82	0.14	0.02	1.27	3.59	0.61
[7998]	INTRAPLATE VOLCANICS	ANATOLIA-IRAN BELT - CENOZOIC/QUATERNARY / ANATOLIA / EASTERN ANATOLIAN VOLCANIC BELT	KIRIKHAN (HATAY), KARASU VALLEY	36.35	36.35	36.5	36.5	SUBAERIAL			s OP-50 [7998]	BASALT, OLIVINE [7998]				NEOGENE [7998]	Collision					0.90625		MICROCRYSTALLINE MATRIX [7998]	VOLCANIC ROCK					WHOLE_ROCK [7998]	49.29	1.88		14.71	0.04			11.32	8.64	6.91	0.14	0.02	1.26	3.55	0.62
[7998]	INTRAPLATE VOLCANICS	ANATOLIA-IRAN BELT - CENOZOIC/QUATERNARY / ANATOLIA / EASTERN ANATOLIAN VOLCANIC BELT	KIRIKHAN (HATAY), KARASU VALLEY	36.35	36.35	36.5	36.5	SUBAERIAL			s OP-47 [7998]	BASALT, OLIVINE [7998]				NEOGENE [7998]	Collision					0.925926		MICROCRYSTALLINE MATRIX [7998]	VOLCANIC ROCK					WHOLE_ROCK [7998]	49.29	2.08		15.2	0.02			11.38	8.81	5.19	0.15	0.01	1.25	3.57	0.47
[7998]	INTRAPLATE VOLCANICS	ANATOLIA-IRAN BELT - CENOZOIC/QUATERNARY / ANATOLIA / EASTERN ANATOLIAN VOLCANIC BELT	KIRIKHAN (HATAY), KARASU VALLEY	36.35	36.35	36.5	36.5	SUBAERIAL			s OP-51 [7998]	BASALT, OLIVINE [7998]				NEOGENE [7998]	Collision					0.965517		MICROCRYSTALLINE MATRIX [7998]	VOLCANIC ROCK					WHOLE_ROCK [7998]	48.88	1.86		14.49	0.03			11.16	9	6.67	0.14	0.02	1.28	3.51	0.61
[7998]	INTRAPLATE VOLCANICS	ANATOLIA-IRAN BELT - CENOZOIC/QUATERNARY / ANATOLIA / EASTERN ANATOLIAN VOLCANIC BELT	KIRIKHAN (HATAY), KARASU VALLEY	36.35	36.35	36.5	36.5	SUBAERIAL			s OP-52 [7998]	BASALT, OLIVINE [7998]				NEOGENE [7998]	Collision					0.931034		MICROCRYSTALLINE MATRIX [7998]	VOLCANIC ROCK					WHOLE_ROCK [7998]	48.73	1.86		14.52	0.03			11.13	9.26	6.8	0.14	0.02	1.26	3.48	0.61
[10535]	INTRAPLATE VOLCANICS	ANATOLIA-IRAN BELT - CENOZOIC/QUATERNARY / ANATOLIA / EASTERN ANATOLIAN VOLCANIC BELT	PAZARCIK NORTH OF NARLI, KAHRAMAN MARAS AREA	37.2	37.2	37.45	37.45	SUBAERIAL			s X [10535]	ANDESITE, BASALTIC [10535]				PLEISTOCENE [10535]	Collision		0.247059		16.3118	1.20673			VOLCANIC ROCK					WHOLE_ROCK [10535]	52.23	1.835		15.03				9.25	9.18	4.76	0.123		1.28	3.44	0.286
[10535]	INTRAPLATE VOLCANICS	ANATOLIA-IRAN BELT - CENOZOIC/QUATERNARY / ANATOLIA / EASTERN ANATOLIAN VOLCANIC BELT	TOPRAKKALE 3, ISKENDERUN GULF AREA	36.13	36.13	37.07	37.07	SUBAERIAL			s T7 [10535]	BASALT, SUBALKALINE [10535]				PLEISTOCENE [10535]	Collision		0.367647		17.0294	0.404624			VOLCANIC ROCK					WHOLE_ROCK [10535]	48.12	1.883		15.27				11.27	9.73	7.57	0.164		0.73	3.23	0.325
[10535]	INTRAPLATE VOLCANICS	ANATOLIA-IRAN BELT - CENOZOIC/QUATERNARY / ANATOLIA / EASTERN ANATOLIAN VOLCANIC BELT	TOPRAKKALE 3, ISKENDERUN GULF AREA	36.13	36.13	37.07	37.07	SUBAERIAL			s T6 [10535]	BASALT, SUBALKALINE [10535]				PLEISTOCENE [10535]	Collision		0.242424		15.7525	0.323864			VOLCANIC ROCK					WHOLE_ROCK [10535]	47.77	1.886		15.39				11.24	9.91	7.9	0.16		0.76	3.05	0.307
[10535]	INTRAPLATE VOLCANICS	ANATOLIA-IRAN BELT - CENOZOIC/QUATERNARY / ANATOLIA / EASTERN ANATOLIAN VOLCANIC BELT	TOPRAKKALE 1, ISKENDERUN GULF AREA	36.15	36.15	37.05	37.05	SUBAERIAL			s T1 [10535]	BASALT, SUBALKALINE [10535]				PLEISTOCENE [10535]	Collision		0.213198		9.51269	0.353933			VOLCANIC ROCK					WHOLE_ROCK [10535]	47.65	1.925		15.23				11.74	9.76	8.03	0.177		0.7	3.18	0.318
[10535]	INTRAPLATE VOLCANICS	ANATOLIA-IRAN BELT - CENOZOIC/QUATERNARY / ANATOLIA / EASTERN ANATOLIAN VOLCANIC BELT	KURTPINAR, ISKENDERUN GULF AREA	35.95	35.95	36.93	36.93	SUBAERIAL			s K [10535]	BASALT, SUBALKALINE [10535]				PLEISTOCENE [10535]	Collision		0.211488		7.10183	0.383212			VOLCANIC ROCK					WHOLE_ROCK [10535]	47.53	1.891		15.03				11.58	9.71	8.48	0.18		0.77	3.15	0.458
[10535]	INTRAPLATE VOLCANICS	ANATOLIA-IRAN BELT - CENOZOIC/QUATERNARY / ANATOLIA / EASTERN ANATOLIAN VOLCANIC BELT	TOPRAKKALE 3, ISKENDERUN GULF AREA	36.13	36.13	37.07	37.07	SUBAERIAL			s T5 [10535]	BASALT, SUBALKALINE [10535]				PLEISTOCENE [10535]	Collision		0.375		18.0188	0.327684			VOLCANIC ROCK					WHOLE_ROCK [10535]	47.51	1.862		15.03				11.43	9.81	8.43	0.166		0.75	3.07	0.31
[10535]	INTRAPLATE VOLCANICS	ANATOLIA-IRAN BELT - CENOZOIC/QUATERNARY / ANATOLIA / EASTERN ANATOLIAN VOLCANIC BELT	TOPRAKKALE 1, ISKENDERUN GULF AREA	36.15	36.15	37.05	37.05	SUBAERIAL			s T2 [10535]	BASALT, SUBALKALINE [10535]				PLEISTOCENE [10535]	Collision		0.234637		9.49721	0.325967			VOLCANIC ROCK					WHOLE_ROCK [10535]	47.39	1.896		15.34				11.63	9.84	7.7	0.169		0.69	3.29	0.316
[10535]	INTRAPLATE VOLCANICS	ANATOLIA-IRAN BELT - CENOZOIC/QUATERNARY / ANATOLIA / EASTERN ANATOLIAN VOLCANIC BELT	GATES OF ISSOS, ISKENDERUN GULF AREA	36.15	36.15	37.02	37.02	SUBAERIAL			s T8 [10535]	BASALT, SUBALKALINE [10535]				PLEISTOCENE [10535]	Collision		0.274809		13.8015	0.39011			VOLCANIC ROCK					WHOLE_ROCK [10535]	47.2	1.946		15.42				11.75	9.74	7.84	0.18		0.72	3.16	0.314
[10535]	INTRAPLATE VOLCANICS	ANATOLIA-IRAN BELT - CENOZOIC/QUATERNARY / ANATOLIA / EASTERN ANATOLIAN VOLCANIC BELT	SARIMAZI BEACH, ISKENDERUN GULF AREA	36.03	36.03	36.93	36.93	SUBAERIAL			s T9 [10535]	BASANITE [10535]				PLEISTOCENE [10535]	Collision		0.304813		10.6043	0.423676			VOLCANIC ROCK					WHOLE_ROCK [10535]	44.77	2.554		15.29				11.64	9.93	9.27	0.186		1.27	3.23	0.476
[10535]	INTRAPLATE VOLCANICS	ANATOLIA-IRAN BELT - CENOZOIC/QUATERNARY / ANATOLIA / EASTERN ANATOLIAN VOLCANIC BELT	TOPRAKKALE 2, ISKENDERUN GULF AREA	36.13	36.13	37.05	37.05	SUBAERIAL			s T3 [10535]	BASANITE [10535]				PLEISTOCENE [10535]	Collision		0.108992		8.73569	0.278431			VOLCANIC ROCK					WHOLE_ROCK [10535]	43.9	2.88		15.36				11.97	10.4	8.35	0.176		1.43	3.71	0.85
[10535]	INTRAPLATE VOLCANICS	ANATOLIA-IRAN BELT - CENOZOIC/QUATERNARY / ANATOLIA / EASTERN ANATOLIAN VOLCANIC BELT	TOPRAKKALE 2, ISKENDERUN GULF AREA	36.13	36.13	37.05	37.05	SUBAERIAL			s T4 [10535]	BASANITE [10535]				PLEISTOCENE [10535]	Collision		0.152905		10.0459	0.270059			VOLCANIC ROCK					WHOLE_ROCK [10535]	43.87	2.831		14.94				11.91	10.25	8.78	0.178		1.37	3.68	0.842
[14148]	INTRAPLATE VOLCANICS	ANATOLIA-IRAN BELT - CENOZOIC/QUATERNARY / ANATOLIA / EASTERN ANATOLIAN VOLCANIC BELT	BÜYÜK HÖYÜK, KARASU VALLEY	36.67	36.67	36.62	36.62	SUBAERIAL			s 99YW83 [14148]	BASALT [14148]				QUATERNARY [14148]	Collision		0.146341		13.9756	0.754717		PORPHYRITIC [14148]	VOLCANIC ROCK					WHOLE_ROCK [14148]	51.45	2.32		18.21				8.86	6.66	3.07	0.17		1.98	4.44	0.79
[14148]	INTRAPLATE VOLCANICS	ANATOLIA-IRAN BELT - CENOZOIC/QUATERNARY / ANATOLIA / EASTERN ANATOLIAN VOLCANIC BELT	HASSA, KARASU VALLEY	36.67	36.67	36.62	36.62	SUBAERIAL			s 99YW89 [14148]	BASALT [14148]				QUATERNARY [14148]	Collision		0.333333		14.1481	0.69697		PORPHYRITIC [14148]	VOLCANIC ROCK					WHOLE_ROCK [14148]	51.29	1.98		16.37				10.18	7.84	5.33	0.15		1.31	3.7	0.46
[14148]	INTRAPLATE VOLCANICS	ANATOLIA-IRAN BELT - CENOZOIC/QUATERNARY / ANATOLIA / EASTERN ANATOLIAN VOLCANIC BELT	KARACAGIL, KARASU VALLEY	36.67	36.67	36.62	36.62	SUBAERIAL			s 99YW84 [14148]	BASALT [14148]				QUATERNARY [14148]	Collision		0.222222		13.4444	0.823529		PORPHYRITIC [14148]	VOLCANIC ROCK					WHOLE_ROCK [14148]	50.69	2.22		16.51				10.43	7.91	5.37	0.16		1.44	3.72	0.42
[14148]	INTRAPLATE VOLCANICS	ANATOLIA-IRAN BELT - CENOZOIC/QUATERNARY / ANATOLIA / EASTERN ANATOLIAN VOLCANIC BELT	KARACAGIL, KARASU VALLEY	36.67	36.67	36.62	36.62	SUBAERIAL			s 99YW85 [14148]	BASALT [14148]				QUATERNARY [14148]	Collision		0.172414		15.2414	0.939394		PORPHYRITIC [14148]	VOLCANIC ROCK					WHOLE_ROCK [14148]	50.45	2.16		16.49				10.36	7.95	5.14	0.22		1.4	3.69	0.41
[14148]	INTRAPLATE VOLCANICS	ANATOLIA-IRAN BELT - CENOZOIC/QUATERNARY / ANATOLIA / EASTERN ANATOLIAN VOLCANIC BELT	HACILAR, KARASU VALLEY	36.67	36.67	36.62	36.62	SUBAERIAL			s 99YW91 [14148]	BASALT [14148]				QUATERNARY [14148]	Collision				18.3182	0.56		PORPHYRITIC [14148]	VOLCANIC ROCK					WHOLE_ROCK [14148]	50.25	2.04		16.46				10.35	8.16	6.59	0.17		1.14	3.33	0.31
[14148]	INTRAPLATE VOLCANICS	ANATOLIA-IRAN BELT - CENOZOIC/QUATERNARY / ANATOLIA / EASTERN ANATOLIAN VOLCANIC BELT	KÜRECI, KARASU VALLEY	36.67	36.67	36.62	36.62	SUBAERIAL			s 99YW92 [14148]	BASALT [14148]				QUATERNARY [14148]	Collision		0.235294		13.5294	0.904762		PORPHYRITIC [14148]	VOLCANIC ROCK					WHOLE_ROCK [14148]	50.24	2.15		16.65				11.03	8.24	5.54	0.17		1.13	3.71	0.3
[14148]	INTRAPLATE VOLCANICS	ANATOLIA-IRAN BELT - CENOZOIC/QUATERNARY / ANATOLIA / EASTERN ANATOLIAN VOLCANIC BELT	KARACAGIL, KARASU VALLEY	36.67	36.67	36.62	36.62	SUBAERIAL			s 99YW86 [14148]	BASALT [14148]				QUATERNARY [14148]	Collision		0.129032		17.7419	0.852941		PORPHYRITIC [14148]	VOLCANIC ROCK					WHOLE_ROCK [14148]	50.23	2.22		16.76				10.43	7.4	5.05	0.16		1.39	3.42	0.45
[14148]	INTRAPLATE VOLCANICS	ANATOLIA-IRAN BELT - CENOZOIC/QUATERNARY / ANATOLIA / EASTERN ANATOLIAN VOLCANIC BELT	KÜRECI, KARASU VALLEY	36.67	36.67	36.62	36.62	SUBAERIAL			s 99YW93 [14148]	BASALT [14148]				QUATERNARY [14148]	Collision		0.0769231		19	0.809524		PORPHYRITIC [14148]	VOLCANIC ROCK					WHOLE_ROCK [14148]	49.85	2.18		16.7				10.91	8.24	5.46	0.17		1.1	3.64	0.3
[14148]	INTRAPLATE VOLCANICS	ANATOLIA-IRAN BELT - CENOZOIC/QUATERNARY / ANATOLIA / EASTERN ANATOLIAN VOLCANIC BELT	KIRANYURDU, KARASU VALLEY	36.67	36.67	36.62	36.62	SUBAERIAL			s 99YW94 [14148]	BASALT [14148]				QUATERNARY [14148]	Collision		0.0434783		11.1739	0.857143		PORPHYRITIC [14148]	VOLCANIC ROCK					WHOLE_ROCK [14148]	49.64	2.16		17.14				11.29	7.94	5.37	0.17		1.11	3.54	0.3
[14148]	INTRAPLATE VOLCANICS	ANATOLIA-IRAN BELT - CENOZOIC/QUATERNARY / ANATOLIA / EASTERN ANATOLIAN VOLCANIC BELT	KIRANYURDU, KARASU VALLEY	36.67	36.67	36.62	36.62	SUBAERIAL			s 99YW95 [14148]	BASALT [14148]				QUATERNARY [14148]	Collision				54.0714	0.75		PORPHYRITIC [14148]	VOLCANIC ROCK					WHOLE_ROCK [14148]	48.96	2.19		17.13				11.37	7.62	5.4	0.17		1.15	3.42	0.31
[14148]	INTRAPLATE VOLCANICS	ANATOLIA-IRAN BELT - CENOZOIC/QUATERNARY / ANATOLIA / EASTERN ANATOLIAN VOLCANIC BELT	SÖGÜT, KARASU VALLEY	36.67	36.67	36.62	36.62	SUBAERIAL			s 99YW87 [14148]	BASALT [14148]				QUATERNARY [14148]	Collision		0.0789474		9.26316	0.425532		PORPHYRITIC [14148]	VOLCANIC ROCK					WHOLE_ROCK [14148]	47.14	2.68		15.72				11.24	9.66	6.57	0.17		1.19	3.6	0.61
[14148]	INTRAPLATE VOLCANICS	ANATOLIA-IRAN BELT - CENOZOIC/QUATERNARY / ANATOLIA / EASTERN ANATOLIAN VOLCANIC BELT	SÖGÜT, KARASU VALLEY	36.67	36.67	36.62	36.62	SUBAERIAL			s 99YW88 [14148]	BASALT [14148]				QUATERNARY [14148]	Collision		0.1		12.4	0.369565		PORPHYRITIC [14148]	VOLCANIC ROCK					WHOLE_ROCK [14148]	46.88	2.71		15.8				11.22	9.77	6.69	0.17		1.13	3.34	0.6
[14148]	INTRAPLATE VOLCANICS	ANATOLIA-IRAN BELT - CENOZOIC/QUATERNARY / ANATOLIA / EASTERN ANATOLIAN VOLCANIC BELT	HACILAR, KARASU VALLEY	36.67	36.67	36.62	36.62	SUBAERIAL			s 99YW90 [14148]	BASALT [14148]				QUATERNARY [14148]	Collision		0.0645161		11.7742	0.361702		PORPHYRITIC [14148]	VOLCANIC ROCK					WHOLE_ROCK [14148]	46.49	2.72		15.82				11.16	9.57	6.76	0.17		1.05	3.21	0.61
[21788]	CONVERGENT MARGIN	KOHISTAN-LADAKH TERRANE (GANGDISE BELT) / KOHISTAN ARC / SOUTHERN PLUTONIC COMPLEX		72.9865	72.9865	35.0996	35.0996	SAE			s_P06-23 [21788]	GABBRO [21788]				CRETACEOUS [21788]	Subduction			6.12598	25.9843	5.2057	3.36795	COARSE GRAINED [21788]	PLU					WR [21788]	41.4588	0.380255		21.474		14.5818	12.9632		12.195	7.55448	0.37132		0.0635414	1.11992	0.0228352
[21788]	CONVERGENT MARGIN	KOHISTAN-LADAKH TERRANE (GANGDISE BELT) / KOHISTAN ARC / SOUTHERN PLUTONIC COMPLEX		72.9633	72.9633	35.0737	35.0737	SAE			s_P06-19 [21788]	GABBRO, GARNET [21788]				CRETACEOUS [21788]	Subduction	0.00694243	0.0447578	2.41204	39.3901		4.96997	COARSE GRAINED [21788]	PLU					WR [21788]	41.6139	0.471168		19.4157		14.6319	13.0077		13.246	8.46719	0.303246		0.00987773	1.12409	0.0286454
[21788]	CONVERGENT MARGIN	KOHISTAN-LADAKH TERRANE (GANGDISE BELT) / KOHISTAN ARC / SOUTHERN PLUTONIC COMPLEX		72.9633	72.9633	35.0737	35.0737	SAE			s_P06-05 [21788]	GABBRO, GARNET [21788]				CRETACEOUS [21788]	Subduction	0.00561987	0.0230104	1.61452	47.9369		6.12773	COARSE GRAINED [21788]	PLU					WR [21788]	44.797	0.503		20.43		13.275	11.8015		12.702	6.658	0.26		0.064	1.776	0.029
[21788]	CONVERGENT MARGIN	KOHISTAN-LADAKH TERRANE (GANGDISE BELT) / KOHISTAN ARC / SOUTHERN PLUTONIC COMPLEX		72.9633	72.9633	35.0737	35.0737	SAE			s_P06-09 [21788]	GABBRO, GARNET [21788]				CRETACEOUS [21788]	Subduction			1.1252	27.5031	1.28156	7.17891		PLU					WR [21788]	50.2828	0.790944		18.4798		11.5612	10.2779		10.0318	4.96444	0.205903		0.0811732	1.79274	0.106911
[21788]	CONVERGENT MARGIN	KOHISTAN-LADAKH TERRANE (GANGDISE BELT) / KOHISTAN ARC / SOUTHERN PLUTONIC COMPLEX		72.9633	72.9633	35.0737	35.0737	SAE			s_P06-13 [21788]	GABBRO, GARNET [21788]				CRETACEOUS [21788]	Subduction	0.00625107	0.00844231	1.12113	45.232	3.96641	7.97353		PLU					WR [21788]	45.6639	0.885853		19.1358		12.9724	11.5325		11.6446	6.01905	0.213554		0.0949128	1.87749	0.0435017
[21788]	CONVERGENT MARGIN	KOHISTAN-LADAKH TERRANE (GANGDISE BELT) / KOHISTAN ARC / SOUTHERN PLUTONIC COMPLEX		72.9633	72.9633	35.0737	35.0737	SAE			s_P06-15 [21788]	GABBRO, GARNET [21788]				CRETACEOUS [21788]	Subduction			1.09753	24.154	1.11996	7.66644		PLU					WR [21788]	50.6092	0.791017		18.4125		11.6264	10.3358		10.1395	4.94039	0.20618		0.0911949	2.12722	0.112011
[21788]	CONVERGENT MARGIN	KOHISTAN-LADAKH TERRANE (GANGDISE BELT) / KOHISTAN ARC / SOUTHERN PLUTONIC COMPLEX		72.9633	72.9633	35.0737	35.0737	SAE			s_P06-12 [21788]	GABBRO, GARNET [21788]				CRETACEOUS [21788]	Subduction			1.04837	60.586	3.86549	6.90955		PLU					WR [21788]	45.7824	0.871159		19.3219		13.6465	12.1318		11.6854	6.24166	0.250458		0.0910758	1.72549	0.0455379
[13235][16435]	CONVERGENT MARGIN	KOHISTAN-LADAKH TERRANE (GANGDISE BELT) / KOHISTAN ARC / PATAN-DASU COMPLEX / PATAN UNIT		73.0212	73.0212	35.121	35.121	SAE			s_KH97-117 [13235]	GABBRO [13235]				CRETACEOUS [13235] / MESOZOIC [16435]	Subduction	0.0501931	0.015625	0.975057	18.75	0.74537	7.44118		PLU					WR [13235]	53.66	0.79		17.08				8.96	9.32	4.92	0.19		0.38	2.43	0.14
[21788]	CONVERGENT MARGIN	KOHISTAN-LADAKH TERRANE (GANGDISE BELT) / KOHISTAN ARC / SOUTHERN PLUTONIC COMPLEX		72.9633	72.9633	35.0737	35.0737	SAE			s_P06-18 [21788]	GABBRO, GARNET [21788]				CRETACEOUS [21788]	Subduction	0.00854647	0.0205751	0.930685	99.0357		8.86093	COARSE GRAINED [21788]	PLU					WR [21788]	45.5497	0.88972		18.9995		12.5105	11.1218		12.6528	6.28933	0.202658		0.0642576	1.5323	0.0306459
[21788]	CONVERGENT MARGIN	KOHISTAN-LADAKH TERRANE (GANGDISE BELT) / KOHISTAN ARC / SOUTHERN PLUTONIC COMPLEX		72.9633	72.9633	35.0737	35.0737	SAE			s_P06-10 [21788]	GABBRO, GARNET [21788]				CRETACEOUS [21788]	Subduction		0.00610496	0.909354	36.0716	3.3347	6.99253		PLU					WR [21788]	46.2051	0.860275		19.1025		13.3323	11.8524		11.5919	6.04967	0.240837		0.0852346	1.74929	0.0525283
[13235][16435]	CONVERGENT MARGIN	KOHISTAN-LADAKH TERRANE (GANGDISE BELT) / KOHISTAN ARC / PATAN-DASU COMPLEX / PATAN UNIT		73.0266	73.0266	35.1202	35.1202	SAE			s_KG-10 [13235]	GABBRO [13235]				CRETACEOUS [13235] / MESOZOIC [16435]	Subduction	0.310185	0.104524	0.890585	17.9407	4.42105	6.91176		PLU					WR [13235]	52.49	0.8		17.57				8.68	9.62	5.03	0.16		0.41	2.27	0.21
[21788]	CONVERGENT MARGIN	KOHISTAN-LADAKH TERRANE (GANGDISE BELT) / KOHISTAN ARC / SOUTHERN PLUTONIC COMPLEX		72.9633	72.9633	35.0737	35.0737	SAE			s_P06-17 [21788]	GABBRO, GARNET [21788]				CRETACEOUS [21788]	Subduction	0.00721527		0.880796	22.108		8.20143		PLU					WR [21788]	50.2413	0.810312		18.5837		11.9506	10.6241		10.3716	5.15509	0.210007		0.0832105	1.60576	0.106985
[21788]	CONVERGENT MARGIN	KOHISTAN-LADAKH TERRANE (GANGDISE BELT) / KOHISTAN ARC / SOUTHERN PLUTONIC COMPLEX		72.9633	72.9633	35.0737	35.0737	SAE			s_P06-11 [21788]	GABBRO, GARNET [21788]				CRETACEOUS [21788]	Subduction			0.844429	6.48174	0.813446	6.95817		PLU					WR [21788]	48.5403	0.867978		18.3944		12.4695	11.0854		12.3454	5.4492	0.238346		0.0417106	0.953386	0.0576004
[21788]	CONVERGENT MARGIN	KOHISTAN-LADAKH TERRANE (GANGDISE BELT) / KOHISTAN ARC / SOUTHERN PLUTONIC COMPLEX		72.9633	72.9633	35.0737	35.0737	SAE			s_P06-16 [21788]	GABBRO, GARNET [21788]				CRETACEOUS [21788]	Subduction	0.00824077	0.00638347	0.810161	29.701		8.2608		PLU					WR [21788]	49.0247	0.839603		18.6525		12.0277	10.6926		10.7039	5.14356	0.207921		0.0861385	1.5703	0.111881
[21788]	CONVERGENT MARGIN	KOHISTAN-LADAKH TERRANE (GANGDISE BELT) / KOHISTAN ARC / SOUTHERN PLUTONIC COMPLEX		72.9633	72.9633	35.0737	35.0737	SAE			s_P06-14 [21788]	GABBRO, GARNET [21788]				CRETACEOUS [21788]	Subduction		0.00598584	0.705248	51.1305	4.70315	7.86695		PLU					WR [21788]	45.2043	0.867962		19.2664		13.4628	11.9684		12.0644	6.25685	0.243465		0.0821446	1.62508	0.0376084
[13235][16435]	CONVERGENT MARGIN	KOHISTAN-LADAKH TERRANE (GANGDISE BELT) / KOHISTAN ARC / PATAN-DASU COMPLEX / PATAN UNIT		73.0274	73.0274	35.1165	35.1165	SAE			s_KG-09 [13235]	GABBRO [13235]				CRETACEOUS [13235] / MESOZOIC [16435]	Subduction	0.145729	0.0528233	0.686071	14.663	0.873874	9.85185		PLU					WR [13235]	53.91	0.95		19.28				9.48	10.17	4.68	0.16		0.24	2.26	0.13
[21788]	CONVERGENT MARGIN	KOHISTAN-LADAKH TERRANE (GANGDISE BELT) / KOHISTAN ARC / SOUTHERN PLUTONIC COMPLEX		73.1285	73.1285	35.2043	35.2043	SAE			s_P06-40 [21788]	GABBRO [21788]				CRETACEOUS [21788]	Subduction			0.592596				COARSE GRAINED [21788]	PLU					WR [21788]	47.5398	0.432725		16.8792		8.83054	7.85035		12.6621	9.55339	0.14752		0.07376	2.31508	0.0137685
[21788]	CONVERGENT MARGIN	KOHISTAN-LADAKH TERRANE (GANGDISE BELT) / KOHISTAN ARC / SOUTHERN PLUTONIC COMPLEX		73.0071	73.0071	35.1154	35.1154	SAE			s_P06-26 [21788]	GABBRO [21788]				CRETACEOUS [21788]	Subduction	0.0640272	0.0212478	0.569968	28.9508	2.45131	7.55011		PLU					WR [21788]	48.0536	0.824387		21.8028		9.4933	8.43954		10.6518	4.06559	0.202637		0.309392	3.26097	0.385505
[21788]	CONVERGENT MARGIN	KOHISTAN-LADAKH TERRANE (GANGDISE BELT) / KOHISTAN ARC / SOUTHERN PLUTONIC COMPLEX		73.0299	73.0299	35.1206	35.1206	SAE			s_P06-29 [21788]	GABBRO [21788]				CRETACEOUS [21788]	Subduction	0.144298	0.0498479	0.451036	25.7204	4.40724	10.5884		PLU					WR [21788]	48.9895	0.862366		19.2918		10.6236	9.44441		10.3613	4.37618	0.181186		0.320788	3.08907	0.271284
[13235][16435]	CONVERGENT MARGIN	KOHISTAN-LADAKH TERRANE (GANGDISE BELT) / KOHISTAN ARC / PATAN-DASU COMPLEX / PATAN UNIT		73.023	73.023	35.1206	35.1206	SAE			s_KG-08 [13235]	GABBRO [13235]				CRETACEOUS [13235] / MESOZOIC [16435]	Subduction	0.0560748	0.0229008	0.405728	35.3053	3.29897	7.71429		PLU					WR [13235]	49.8	0.81		17.65				10.3	10.47	5.9	0.19		0.44	1.73	0.06
[13235][16435]	CONVERGENT MARGIN	KOHISTAN-LADAKH TERRANE (GANGDISE BELT) / KOHISTAN ARC / PATAN-DASU COMPLEX / PATAN UNIT		73.0146	73.0146	35.1187	35.1187	SAE			s_KG-07 [13235]	GABBRO [13235]				CRETACEOUS [13235] / MESOZOIC [16435]	Subduction	0.105528	0.0375671	0.397112	24.6869	2.23387	7.78125		PLU					WR [13235]	52.14	0.82		17.49				9.05	9.78	5.52	0.17		0.49	2.09	0.11
[21788]	CONVERGENT MARGIN	KOHISTAN-LADAKH TERRANE (GANGDISE BELT) / KOHISTAN ARC / SOUTHERN PLUTONIC COMPLEX		74.0508	74.0508	36.1431	36.1431	SAE			s_P06-32 [21788]	GABBRODIORITE [21788]				CRETACEOUS [21788]	Subduction	0.256965	0.0701825	0.391878	8.34834	1.87949	8.65641		PLU					WR [21788]	44.921	1.15786		20.6908		12.962	11.5233		12.1086	4.9788	0.208615		0.231572	2.05021	0.318412
[21684]	CONVERGENT MARGIN	KOHISTAN-LADAKH TERRANE (GANGDISE BELT) / KOHISTAN ARC / CHILAS COMPLEX		74.1499	74.1499	35.409	35.409	SAE			s_C7 [21684]	GABBRONORITE [21684]				MESOZOIC [21684]	Subduction			0.383333	30.6667				PLU					WR [21684]	52.15	0.297		18.86				7.07	9.68	7.77	0.133		0.16	2.69	0.02
[23371]	INTRAPLATE VOLCANICS	ANATOLIA-IRAN BELT - MESOZOIC / TURKEY / PONTIDES / GOKCEDERE PLUTON, SAKARYA ZONE		40	40	41	41	SAE			s_GD9 [23371]	GABBRO [23371]			LOWER [23371]	JURASSIC [23371]	Subduction	0.316456	0.113636	0.375	25.2273	5.92308	8.82857		PLU					WR [23371]	52.19	0.88		18.83	0			8.76	8.81	4.47	0.18		0.47	3.31	0.09
[13235][16435]	CONVERGENT MARGIN	KOHISTAN-LADAKH TERRANE (GANGDISE BELT) / KOHISTAN ARC / PATAN-DASU COMPLEX / PATAN UNIT		73.0072	73.0072	35.1156	35.1156	SAE			s_KH97-115 [13235]	GABBRO [13235]				CRETACEOUS [13235] / MESOZOIC [16435]	Subduction	0.0740741	0.0326087	0.363165	29.3478	1.73563	6.44737		PLU					WR [13235]	48.18	0.71		18.22				10.26	10.95	6.18	0.18		0.29	2.14	0.03
[20127]	INTRAPLATE VOLCANICS	CARPATHIAN BELT AND PANNONIAN BASIN / SOUTHERN PANNONIAN-EASTERN CARPATHIAN (TISZA-DACIA / SREDNOGORIE ARC / CAPITAN DIMITRIEVO PLUTON		24	24	43	43	SAE			s_BK/71A [20127]	GABBRO [20127]				CRETACEOUS [20127]	Subduction	0.657407	0.0684667	0.354839	16.4417	12.8378			PLU					WR [20127]	47.82	1.14		18.43		4.5	6.04		10.5	5	0.37		1.16	3.5	0.83			0.17
[23371]	INTRAPLATE VOLCANICS	ANATOLIA-IRAN BELT - MESOZOIC / TURKEY / PONTIDES / GOKCEDERE PLUTON, SAKARYA ZONE		40	40	41	41	SAE			s_GD6 [23371]	GABBRO [23371]			LOWER [23371]	JURASSIC [23371]	Subduction			0.35	36.0606	10.5556	5.88889		PLU					WR [23371]	52.23	0.48		17.38	0.01			6.9	10.43	6.93	0.15		0.48	2.61	0.03
[24190]	CONVERGENT MARGIN	KOHISTAN-LADAKH TERRANE (GANGDISE BELT) / KOHISTAN ARC / CHILAS COMPLEX		74.1	74.1	35.41	35.41	SAE			s_S20-A [24190]	GABBRO [24190]				CRETACEOUS [24190]	Subduction	0.0270096	0.0137031	0.344604	8.79282	0.597122		EQUIGRANULAR [24190]	PLU					WR [24190]	45.38	1.044		16.37				13.52	9.73	7.75	0.238		0.41	2.7	0.08
[13759]	INTRAPLATE VOLCANICS	CARPATHIAN BELT AND PANNONIAN BASIN / SOUTHERN PANNONIAN-EASTERN CARPATHIAN (TISZA-DACIA / SREDNOGORIE ARC	MONASTERY HEIGHTS, STRANDZHA MOUNTAINS	26.3529	26.3529	42.2115	42.2115	SAE			s_AVQ 046 [13759]	GABBRONORITE, HORNBLENDE [13759]			UPPER [13759]	CRETACEOUS [13759]	Subduction	0.412679	0.148264	0.342147	16.413	12.3514	8.77252		PLU					WR [13759]	45.9626	0.876255		12.6955				13.4342	14.7231	10.9837	0.254725		0.132457	0.866066	0.010189
[16435]	CONVERGENT MARGIN	KOHISTAN-LADAKH TERRANE (GANGDISE BELT) / KOHISTAN ARC / PATAN-DASU COMPLEX / PATAN UNIT		73.0481	73.0481	35.1267	35.1267	SAE			s_UM01-120 [16435]	GABBRO [16435]				MESOZOIC [16435]	Subduction	0.100759	0.0329743	0.328157	11.8476	0.360656	8.40336		PLU					WR [16435]	51.17	1.48		17.1				10.81	9.26	4.35	0.2		0.3	2.56	0.36
[21684]	CONVERGENT MARGIN	KOHISTAN-LADAKH TERRANE (GANGDISE BELT) / KOHISTAN ARC / CHILAS COMPLEX		74.1471	74.1471	35.4029	35.4029	SAE			s_C 48 [21684]	GABBRONORITE [21684]				MESOZOIC [21684]	Subduction			0.326667	39.8374	1.11111			PLU					WR [21684]	52.38	0.268		18.75				6.98	9.81	7.53	0.131		0.13	2.76	0.03
[23501]	INTRAPLATE VOLCANICS	ANATOLIA-IRAN BELT - CENOZOIC/QUATERNARY / TURKEY / EASTERN ANATOLIAN VOLCANIC BELT / TASLICAY INTRUSION		43	43	39.5	39.5	SAE			s_E45A [23501]	GABBRO [23501]			LOWER [23501]	MIOCENE [23501]	Collision		#DIV/0!			0	0		PLU					WR [23501]	50.46	1.04		17.62				7.98	8.88	5.35	0.14		1.18	3.75	0.13
[21788]	CONVERGENT MARGIN	KOHISTAN-LADAKH TERRANE (GANGDISE BELT) / KOHISTAN ARC / SOUTHERN PLUTONIC COMPLEX		73.0103	73.0103	35.1163	35.1163	SAE			s_P06-27D [21788]	GABBRO [21788]				CRETACEOUS [21788]	Subduction	0.0652656	0.0220684	0.326633	24.3758	1.33875	8.96743		PLU					WR [21788]	52.383	0.898536		17.1542		10.0539	8.93793		9.70992	5.16485	0.175951		0.449762	2.54536	0.0899525
[21684]	CONVERGENT MARGIN	KOHISTAN-LADAKH TERRANE (GANGDISE BELT) / KOHISTAN ARC / CHILAS COMPLEX		74.1408	74.1408	35.5101	35.5101	SAE			s_C86 [21684]	GABBRONORITE [21684]				MESOZOIC [21684]	Subduction	0.137255	0.0492958	0.314	33.4507	2.5			PLU					WR [21684]	49.56	0.727		16.62				10.62	9.21	8.14	0.23		0.13	2.16	0.03
[24190]	CONVERGENT MARGIN	KOHISTAN-LADAKH TERRANE (GANGDISE BELT) / KOHISTAN ARC / CHILAS COMPLEX		74.1	74.1	35.41	35.41	SAE			s_S20-B [24190]	GABBRO [24190]				CRETACEOUS [24190]	Subduction	0.026601	0.0100935	0.305882	10.828	0.589109		EQUIGRANULAR [24190]	PLU					WR [24190]	47.24	0.867		19.09				9.99	10.03	6.1	0.184		0.35	3.17	0.127
[20127]	INTRAPLATE VOLCANICS	CARPATHIAN BELT AND PANNONIAN BASIN / SOUTHERN PANNONIAN-EASTERN CARPATHIAN (TISZA-DACIA / SREDNOGORIE ARC / CAPITAN DIMITRIEVO PLUTON		24	24	43	43	SAE			s_BK/70V [20127]	GABBRO, QUARTZ [20127]				CRETACEOUS [20127]	Subduction	0.784741	0.0963855	0.303665	7.19545	6.97674			PLU					WR [20127]	45.91	1.3		17.52		5.97	6.6		10.29	5.79	0.42		1.36	3.21	0.73			0.11
[23371]	INTRAPLATE VOLCANICS	ANATOLIA-IRAN BELT - MESOZOIC / TURKEY / PONTIDES / GOKCEDERE PLUTON, SAKARYA ZONE		40	40	41	41	SAE			s_GD19 [23371]	GABBRO [23371]			LOWER [23371]	JURASSIC [23371]	Subduction	0.405405	0.214286	0.3	28.5714	13.3333	3.2		PLU					WR [23371]	47.09	0.21		20.59	0.03			4.9	14.46	8.19	0.11		0.25	1.19	0.02
[13235][16435]	CONVERGENT MARGIN	KOHISTAN-LADAKH TERRANE (GANGDISE BELT) / KOHISTAN ARC / PATAN-DASU COMPLEX / PATAN UNIT		73.0129	73.0129	35.1179	35.1179	SAE			s_KH97-116 [13235]	GABBRO [13235]				CRETACEOUS [13235] / MESOZOIC [16435]	Subduction	0.102767	0.0339869	0.298084	30.4575	1.81863	7.08108		PLU					WR [13235]	51.62	0.88		16.6				9.34	9.46	5.15	0.18		0.69	3.76	0.18
[25053]	INTRAPLATE VOLCANICS	ANATOLIA-IRAN BELT - MESOZOIC / TURKEY / PONTIDES	YUSUFELI INTRUSIVE COMPLEX	41.7003	41.7003	40.8569	40.8569	SAE			s_16TK33-1 [25053]	GABBRO, HORNBLENDE [25053]				JURASSIC [25053]	Subduction	0.09375	0.105882	0.297872	57.1765	9.22222	3.34336		PLU					WR [25053]	49.32	0.45		15.09				6.09	15.53	10.18	0.13		0.14	1.44	0.02
[13235][16435]	CONVERGENT MARGIN	KOHISTAN-LADAKH TERRANE (GANGDISE BELT) / KOHISTAN ARC / PATAN-DASU COMPLEX / PATAN UNIT		73.0397	73.0397	35.1189	35.1189	SAE			s_KH97-119 [13235]	GABBRO [13235]				CRETACEOUS [13235] / MESOZOIC [16435]	Subduction	0.175758	0.0654628	0.290635	27.088	2.33607	10		PLU					WR [13235]	51.99	0.69		18.19				9.15	10.45	5.57	0.18		0.31	1.96	0.08
[13235][16435]	CONVERGENT MARGIN	KOHISTAN-LADAKH TERRANE (GANGDISE BELT) / KOHISTAN ARC / PATAN-DASU COMPLEX / PATAN UNIT		73.0319	73.0319	35.1196	35.1196	SAE			s_KH97-118 [13235]	GABBRO [13235]				CRETACEOUS [13235] / MESOZOIC [16435]	Subduction	0.174274	0.0631579	0.284672	20.9023	1.41011	6.69697		PLU					WR [13235]	53.15	1.05		16.7				8.95	9.45	4.81	0.16		0.45	2.41	0.17
[13759]	INTRAPLATE VOLCANICS	CARPATHIAN BELT AND PANNONIAN BASIN / SOUTHERN PANNONIAN-EASTERN CARPATHIAN (TISZA-DACIA / SREDNOGORIE ARC	IZGREV, YAMBOL-BURGAS DEPRESSION	27.7683	27.7683	42.1291	42.1291	SAE			s_AVQ 057 [13759]	GABBRO, HORNBLENDE [13759]			UPPER [13759]	CRETACEOUS [13759]	Subduction	0.095822	0.0353641	0.279914	15.8813	3.90968	11.4069		PLU					WR [13759]	41.025	1.3191		15.0418				16.4366	15.6145	8.8758	0.214737		0.173835	1.12481	0.173835
[23529]	INTRAPLATE VOLCANICS	ANATOLIA-IRAN BELT - MESOZOIC / TURKEY / EASTERN ANATOLIAN VOLCANIC BELT / ELAZIG MAGMATIC COMPLEX		39	39	39	39	SAE			s_96PT [23529]	GABBRO [23529]			UPPER [23529]	CRETACEOUS [23529]	Subduction			0.275	10.7143	4.75	4.53333		PLU					WR [23529]	49.56	0.67		16.13	0.07			5.69	14.52	8.99	0.11		0.09	1.78	0.03
[23371]	INTRAPLATE VOLCANICS	ANATOLIA-IRAN BELT - MESOZOIC / TURKEY / PONTIDES / GOKCEDERE PLUTON, SAKARYA ZONE		40	40	41	41	SAE			s_GD7 [23371]	GABBRO [23371]			LOWER [23371]	JURASSIC [23371]	Subduction	0.709677	0.23913	0.275	28.913	14.4615	9.15385		PLU					WR [23371]	51.42	0.68		19.27	0.01			7.43	7.94	4.94	0.16		0.76	3.92	0.07
[23371]	INTRAPLATE VOLCANICS	ANATOLIA-IRAN BELT - MESOZOIC / TURKEY / PONTIDES / GOKCEDERE PLUTON, SAKARYA ZONE		40	40	41	41	SAE			s_GD1 [23371]	GABBRO [23371]			LOWER [23371]	JURASSIC [23371]	Subduction	0.26616	0.179487	0.271429	27.9487	5.63636	14.275		PLU					WR [23371]	48.39	0.92		18.78	0.01			10.01	11.08	5.32	0.15		0.35	2.24	0.05
[21788]	CONVERGENT MARGIN	KOHISTAN-LADAKH TERRANE (GANGDISE BELT) / KOHISTAN ARC / SOUTHERN PLUTONIC COMPLEX		73.0299	73.0299	35.1206	35.1206	SAE			s_P06-28 [21788]	GABBRO [21788]				CRETACEOUS [21788]	Subduction	0.0856654	0.0336569	0.256559	25.0116	1.67074	7.50917		PLU					WR [21788]	52.5426	0.942015		17.2369		10.3403	9.19257		9.66408	4.96987	0.18642		0.379781	2.5008	0.16163
[24190]	CONVERGENT MARGIN	KOHISTAN-LADAKH TERRANE (GANGDISE BELT) / KOHISTAN ARC / CHILAS COMPLEX		74.1	74.1	35.41	35.41	SAE			s_S33-B [24190]	GABBRO [24190]				CRETACEOUS [24190]	Subduction	0.026087	0.00609756	0.25	16.9919	0.393939		EQUIGRANULAR [24190]	PLU					WR [24190]	52.67	0.677		19.72				7.12	8.7	4.65	0.12		0.21	3.87	0.14
[24760]	INTRAPLATE VOLCANICS	CENTRAL ASIAN FOLDBELT - MESOZOIC / CHINA - MESOZOIC / TIBET	DAZHUKA AREA	89.13	89.4	29.35	29.4	SAE			s_MG3-3-7 [24760]	GABBRO [24760]			UPPER [24760]	CRETACEOUS [24760]	Subduction	0.59014	0.0953219	0.24371	17.137	5.78251	11.2635		PLU					WR [24760]	46.962	1.302		17.69				10.89	8.913	5.702	0.203		1.612	2.99	0.388
[21311]	INTRAPLATE VOLCANICS	ANATOLIA-IRAN BELT - MESOZOIC / IRAN / SANANDAJ-SIRJAN ARC / KHUNRANG INTRUSIVE COMPLEX		58	58	29	29	SAE			s_SS-9-1 [21311]	GABBRO [21311]			MIDDLE [21311]	JURASSIC [21311]	Subduction	0.0428571	0.0152542	0.238462	5.42373	1			PLU					WR [21311]	46	0.73		21.3				10.75	10.95	5.32	0.19		0.19	2.72	0.11
[21503]	INTRAPLATE VOLCANICS	CENTRAL ASIAN FOLDBELT - MESOZOIC / CHINA - MESOZOIC / TIBET / DONGGA GABBRO-GRANITE COMPLEX		88.8422	88.8422	29.4082	29.4082	SAE			s_15TB-1 [21503]	GABBRO [21503]				MESOZOIC [21503]	Subduction	0.217391	0.0645161	0.235294	20.0645	5.31429	7.17557		PLU					WR [21503]	44.53	0.52		16.87				9.26	13.67	11.14	0.14		0.15	0.98	0.01
[21503]	INTRAPLATE VOLCANICS	CENTRAL ASIAN FOLDBELT - MESOZOIC / CHINA - MESOZOIC / TIBET / DONGGA GABBRO-GRANITE COMPLEX		88.8194	88.8194	29.4732	29.4732	SAE			s_15TB-3 [21503]	GABBRO [21503]				MESOZOIC [21503]	Subduction	0.065	0.0225303	0.235294	8.18024	1.13253	6.76259		PLU					WR [21503]	46.51	0.78		19.13				9.47	12.07	7.29	0.19		0.26	2.31	0.11
[24190]	CONVERGENT MARGIN	KOHISTAN-LADAKH TERRANE (GANGDISE BELT) / KOHISTAN ARC / CHILAS COMPLEX		74.1	74.1	35.41	35.41	SAE			s_S3-B [24190]	GABBRO [24190]				CRETACEOUS [24190]	Subduction	0.157	0.0321392	0.232576	16.0696	1.71622		EQUIGRANULAR [24190]	PLU					WR [24190]	53.7	0.598		16.92				7.77	8.47	5.99	0.132		0.62	3.24	0.104
[23371]	INTRAPLATE VOLCANICS	ANATOLIA-IRAN BELT - MESOZOIC / TURKEY / PONTIDES / GOKCEDERE PLUTON, SAKARYA ZONE		40	40	41	41	SAE			s_GD41 [23371]	GABBRO [23371]			LOWER [23371]	JURASSIC [23371]	Subduction	0.591716	0.217391	0.230769	34.7826	6.78947	9.34286		PLU					WR [23371]	51.3	0.59		18.5	0.01			7.85	9.36	5.96	0.17		0.53	2.59	0.06
[21503]	INTRAPLATE VOLCANICS	CENTRAL ASIAN FOLDBELT - MESOZOIC / CHINA - MESOZOIC / TIBET / DONGGA GABBRO-GRANITE COMPLEX		88.8	88.8	29.4	29.4	SAE			s_TB-3 [21503]	GABBRO [21503]				MESOZOIC [21503]	Subduction	0.380952	0.112676	0.230769	25.2817	4.45652	4.58427		PLU					WR [21503]	44.56	0.37		17.25				9.22	13.04	11.61	0.15		0.2	1.2	0.02
[21503]	INTRAPLATE VOLCANICS	CENTRAL ASIAN FOLDBELT - MESOZOIC / CHINA - MESOZOIC / TIBET / DONGGA GABBRO-GRANITE COMPLEX		88.8	88.8	29.4	29.4	SAE			s_TB-8 [21503]	GABBRO [21503]				MESOZOIC [21503]	Subduction	0.0969388	0.0317195	0.230769	8.23038	0.619883	7.02179		PLU					WR [21503]	46.52	0.79		19.05				10.08	11.77	7.14	0.18		0.23	2.34	0.14
[22741]	CONVERGENT MARGIN	KOHISTAN-LADAKH TERRANE (GANGDISE BELT) / LADAKH ARC / DRAS UNIT / KARGIL GABBRO	PANDRAS, THROUGH DRAS TO KARGIL ALONG THE SRINAGAR-LEH NATIONAL HIGHWAY	76	76	34.5	34.5	SAE			s_KG2 [22741]	GABBRO [22741]				CRETACEOUS [22741]	Subduction	0.347826	0.0616967	0.227848	8.16195	1.92339	9.42373		PLU					WR [22741]	48.1	1.28		17.23				9.57	11.99	7.69	0.13		0.38	2.9	0.26
[22958]	INTRAPLATE VOLCANICS	ANATOLIA-IRAN BELT - MESOZOIC / IRAN / SABZEVAR ZONE		57.4706	57.4706	35.8344	35.8344	SAE			s_K-4 [22958]	GABBRODIORITE [22958]			UPPER [22958]	CRETACEOUS [22958]	Subduction	0.460606	0.170404	0.222222	9.04036	57.098	7.82565		PLU					WR [22958]	53.56	0.77		16.71				10.3	5.62	3.67	0.16		3.23	3.56	0.14
[22958]	INTRAPLATE VOLCANICS	ANATOLIA-IRAN BELT - MESOZOIC / IRAN / SABZEVAR ZONE		57.465	57.465	35.8428	35.8428	SAE			s_K-3 [22958]	GABBRODIORITE [22958]			UPPER [22958]	CRETACEOUS [22958]	Subduction	0.440994	0.156733	0.22093	9.12583	62.9	7.9165		PLU					WR [22958]	52.09	0.76		16.4				10.11	5.51	3.95	0.16		4.43	3.49	0.14
[21788]	CONVERGENT MARGIN	KOHISTAN-LADAKH TERRANE (GANGDISE BELT) / KOHISTAN ARC / SOUTHERN PLUTONIC COMPLEX		73.0103	73.0103	35.1163	35.1163	SAE			s_P06-27A [21788]	GABBRO [21788]				CRETACEOUS [21788]	Subduction	0.181143	0.0449524	0.2199	17.0675	1.00929	9.24458		PLU					WR [21788]	51.5022	1.7759		16.1833		11.1152	9.88145		9.85071	5.75781	0.188293		0.478661	2.22979	0.359739
[23371]	INTRAPLATE VOLCANICS	ANATOLIA-IRAN BELT - MESOZOIC / TURKEY / PONTIDES / GOKCEDERE PLUTON, SAKARYA ZONE		40	40	41	41	SAE			s_GD28 [23371]	GABBRO [23371]			LOWER [23371]	JURASSIC [23371]	Subduction	0.706522	0.232143	0.216667	27.5	10.4286	7.5		PLU					WR [23371]	51.59	0.64		18.92	0.01			7.41	9.44	5.42	0.16		0.77	2.37	0.06
[24190]	CONVERGENT MARGIN	KOHISTAN-LADAKH TERRANE (GANGDISE BELT) / KOHISTAN ARC / CHILAS COMPLEX		74.1	74.1	35.41	35.41	SAE			s_S6-C [24190]	GABBRO [24190]				CRETACEOUS [24190]	Subduction	0.561842	0.0642105	0.212281	13.3083	3.65854		EQUIGRANULAR [24190]	PLU					WR [24190]	52.15	0.772		17.74				9.27	6.79	5.15	0.139		0.96	3.15	0.282
[21311]	INTRAPLATE VOLCANICS	ANATOLIA-IRAN BELT - MESOZOIC / IRAN / SANANDAJ-SIRJAN ARC / KHUNRANG INTRUSIVE COMPLEX		58	58	29	29	SAE			s_SS-13 [21311]	GABBRO, PYROXENE-HORNBLENDE [21311]			MIDDLE [21311]	JURASSIC [21311]	Subduction	0.225	0.108	0.211111	14.72	3.44444			PLU					WR [21311]	43.4	0.7		22				11.25	13.05	6.81	0.13		0.3	1.52	0.03
[24190]	CONVERGENT MARGIN	KOHISTAN-LADAKH TERRANE (GANGDISE BELT) / KOHISTAN ARC / CHILAS COMPLEX		74.1	74.1	35.41	35.41	SAE			s_S-37 [24190]	GABBRO [24190]				CRETACEOUS [24190]	Subduction	0.562987	0.0642222	0.208547	13.2593	3.99293		EQUIGRANULAR [24190]	PLU					WR [24190]	50.53	1.13		17.25				10.4	11.52	5.18	0.172		0.14	2.21	0.272
[24264]	INTRAPLATE VOLCANICS	ANATOLIA-IRAN BELT - MESOZOIC / IRAN / URUMIEH-DOKHTAR ARC	OSHNAVIEH COMPLEX	45	45.5	37	37.5	SAE			s_OS13-62 [24264]	GABBRO [24264]			UPPER [24264]	CRETACEOUS [24264]	Subduction	1.29032	0.14	0.20625	6.4	1.12214	7.03448		PLU					WR [24264]	49	1.03		18.28				7.13	11.22	6.87	0.13		0.64	2.79	0.16
[21684]	CONVERGENT MARGIN	KOHISTAN-LADAKH TERRANE (GANGDISE BELT) / KOHISTAN ARC / CHILAS COMPLEX		73.8256	73.8256	35.3987	35.3987	SAE			s_C 132 [21684]	GABBRO, HORNBLENDE [21684]				MESOZOIC [21684]	Subduction	0.458333	0.127536	0.204286	21.7391	6.66667			PLU					WR [21684]	52.44	0.394		18.63				6.69	10.57	7.12	0.135		0.28	2.77	0.05
[22904]	INTRAPLATE VOLCANICS	CENTRAL ASIAN FOLDBELT - MESOZOIC / CHINA - MESOZOIC / TIBET / CUIJIU IGENOUS COMPLEX		92.6675	92.6675	29.1716	29.1716	SAE			s_16CJ14-16 [22904]	GABBRO, HORNBLENDE [22904]			LOWER [22904]	MESOZOIC [22904]	Subduction	0.326425	0.117318	0.204225	14.3948	3.25683	7.40838	NON-CUMULATE [22904]	PLU					WR [22904]	48.6	0.73		16.7				8.66	11.6	7.98	0.17		0.59	2.33	0.12
[13759]	INTRAPLATE VOLCANICS	CARPATHIAN BELT AND PANNONIAN BASIN / SOUTHERN PANNONIAN-EASTERN CARPATHIAN (TISZA-DACIA / SREDNOGORIE ARC	IZGREV, YAMBOL-BURGAS DEPRESSION	27.7645	27.7645	42.1309	42.1309	SAE			s_AVQ 054 [13759]	GABBRO, HORNBLENDE [13759]			UPPER [13759]	CRETACEOUS [13759]	Subduction	1.49129	0.219178	0.202577	32.3716	13.043	11.2236		PLU					WR [13759]	51.988	0.845085		17.4006				9.30102	9.65229	5.06033	0.193453		1.85308	3.34979	0.295271
[21311]	INTRAPLATE VOLCANICS	ANATOLIA-IRAN BELT - MESOZOIC / IRAN / SANANDAJ-SIRJAN ARC / KHUNRANG INTRUSIVE COMPLEX		58	58	29	29	SAE			s_AS-15 [21311]	GABBRO, PYROXENE-HORNBLENDE [21311]			MIDDLE [21311]	JURASSIC [21311]	Subduction	0.288136	0.0772727	0.2	11.803	5.5			PLU					WR [21311]	51.5	0.72		19.15				9.15	9.02	4.6	0.17		0.41	3.45	0.14
[22770]	INTRAPLATE VOLCANICS	ANATOLIA-IRAN BELT - CENOZOIC/QUATERNARY / IRAN / SANANDAJ-SIRJAN ARC / SARDASHT INTRUSION		45.5	45.5	36.5	36.5	SAE			s_VP-9 [22770]	GABBRO [22770]			MIDDLE [22770]	EOCENE [22770]	Subduction	0.0897436	0.0197183	0.2	9.66197	0.0882353			PLU					WR [22770]	46.9	2.91		15.25				10.71	12.35	6.03	0.17		0.15	2.97	0.41
[22770]	INTRAPLATE VOLCANICS	ANATOLIA-IRAN BELT - CENOZOIC/QUATERNARY / IRAN / SANANDAJ-SIRJAN ARC / SARDASHT INTRUSION		45.5	45.5	36.5	36.5	SAE			s_VS-8 [22770]	GABBRO [22770]			MIDDLE [22770]	EOCENE [22770]	Subduction	0.3	0.190909	0.2	17.0909	0.222222			PLU					WR [22770]	51.3	0.33		15.75	0.05			6.73	10.7	11.15	0.13		0.06	3.26	0.01
[22770]	INTRAPLATE VOLCANICS	ANATOLIA-IRAN BELT - CENOZOIC/QUATERNARY / IRAN / SANANDAJ-SIRJAN ARC / SARDASHT INTRUSION		45.5	45.5	36.5	36.5	SAE			s_VS-6 [22770]	GABBRO [22770]			MIDDLE [22770]	EOCENE [22770]	Subduction	0.175676	0.1	0.2	15.5385	0.3125			PLU					WR [22770]	52	0.38		17.3	0.04			5.43	11.3	8.64	0.11		0.09	3.59	0.02
[24264]	INTRAPLATE VOLCANICS	ANATOLIA-IRAN BELT - MESOZOIC / IRAN / URUMIEH-DOKHTAR ARC	OSHNAVIEH COMPLEX	45	45.5	37	37.5	SAE			s_OS13-54 [24264]	GABBRO [24264]			UPPER [24264]	CRETACEOUS [24264]	Subduction	0.643564	0.180556	0.2	20.4167	3.21053	5.95238		PLU					WR [24264]	48.27	0.89		17.26				8.13	12.18	8.11	0.15		0.65	1.89	0.09
[23529]	INTRAPLATE VOLCANICS	ANATOLIA-IRAN BELT - MESOZOIC / TURKEY / EASTERN ANATOLIAN VOLCANIC BELT / ELAZIG MAGMATIC COMPLEX		39	39	39	39	SAE			s_92PT [23529]	GABBRO [23529]			UPPER [23529]	CRETACEOUS [23529]	Subduction			0.2	7.36842	1	5.84211		PLU					WR [23529]	47.61	0.42		21.22	0			5.7	12.76	7.99	0.12		0.07	1.59	0.04
[25053]	INTRAPLATE VOLCANICS	ANATOLIA-IRAN BELT - MESOZOIC / TURKEY / PONTIDES	YUSUFELI INTRUSIVE COMPLEX	41.7004	41.7004	40.8559	40.8559	SAE			s_16TK33-3 [25053]	GABBRO, HORNBLENDE [25053]				JURASSIC [25053]	Subduction	0.300971	0.136865	0.198795	3.84106	0.369048	6.14896		PLU					WR [25053]	49.13	0.97		16.83				8.31	12.45	8.41	0.16		0.1	2.15	0.09
[12761]	INTRAPLATE VOLCANICS	ANATOLIA-IRAN BELT - CENOZOIC/QUATERNARY / IRAN / URUMIEH-DOKHTAR ARC	N BAFT	56.649	56.649	29.335	29.335	SUBAERIAL			s B.06 [12761]	ANDESITE, BASALTIC [12761]				EOCENE [12761]	Subduction	0.469027	0.182969	0.198653	12.7733	5.38521	9.62791		VOLCANIC ROCK					WHOLE_ROCK [12761]	53.96	1.59		13.85		3.96	8.3		7.51	3.75	0.22		0.91	3.03	0.32
[24190]	CONVERGENT MARGIN	KOHISTAN-LADAKH TERRANE (GANGDISE BELT) / KOHISTAN ARC / CHILAS COMPLEX		74.1	74.1	35.41	35.41	SAE			s_S8-B-2 [24190]	GABBRO [24190]				CRETACEOUS [24190]	Subduction	0.304598	0.0625738	0.198496	14.2857	1.00673		EQUIGRANULAR [24190]	PLU					WR [24190]	54.47	0.901		17				7.88	7.91	4.76	0.141		0.72	3.17	0.289
[21788]	CONVERGENT MARGIN	KOHISTAN-LADAKH TERRANE (GANGDISE BELT) / KOHISTAN ARC / SOUTHERN PLUTONIC COMPLEX		72.9769	72.9769	35.0804	35.0804	SAE			s_P06-21 [21788]	GABBRO, GARNET [21788]				CRETACEOUS [21788]	Subduction			0.197552	41.2921	2.9746	13.7001		PLU					WR [21788]	41.7018	1.21565		20.6964		9.25029	8.22351		13.7371	8.14355	0.0735863		0.152078	2.33612	0.019623
[24760]	INTRAPLATE VOLCANICS	CENTRAL ASIAN FOLDBELT - MESOZOIC / CHINA - MESOZOIC / TIBET	DAZHUKA AREA	89.13	89.4	29.35	29.4	SAE			s_MG3-3-20 [24760]	GABBRO [24760]			UPPER [24760]	CRETACEOUS [24760]	Subduction	0.645992	0.0646766	0.19708	15.5833	4.99669	9.14425		PLU					WR [24760]	46.675	1.376		18.02				10.37	9.153	5.578	0.186		1.487	3.229	0.424
[24190]	CONVERGENT MARGIN	KOHISTAN-LADAKH TERRANE (GANGDISE BELT) / KOHISTAN ARC / CHILAS COMPLEX		74.1	74.1	35.41	35.41	SAE			s_S-36 [24190]	GABBRO [24190]				CRETACEOUS [24190]	Subduction	0.858065	0.100758	0.1968	17.1212	4.47368		EQUIGRANULAR [24190]	PLU					WR [24190]	49.85	0.22		19.93				4.53	11.89	6.49	0.137		0.06	2.74	0
[24419]	INTRAPLATE VOLCANICS	ANATOLIA-IRAN BELT - MESOZOIC / TURKEY / PONTIDES / ARPAKOY PLUTON		37.8	37.8	40.9	40.9	SAE			s_M13 [24419]	GABBRODIORITE [24419]			UPPER [24419]	CRETACEOUS [24419]	Subduction	0.613208	0.216667	0.194118	16.3333	2.08			PLU					WR [24419]	53.88	0.71		19.55				7.74	9.36	2.89	0.16		0.31	2.79	0.17
[24190]	CONVERGENT MARGIN	KOHISTAN-LADAKH TERRANE (GANGDISE BELT) / KOHISTAN ARC / CHILAS COMPLEX		74.1	74.1	35.41	35.41	SAE			s_S11-B-1 [24190]	GABBRO [24190]				CRETACEOUS [24190]	Subduction	0.309827	0.0631331	0.194118	14.3698	0.9967		EQUIGRANULAR [24190]	PLU					WR [24190]	51.6	1.031		17.47				8.24	8.99	5.05	0.14		0.46	4.62	0.247
[24419]	INTRAPLATE VOLCANICS	ANATOLIA-IRAN BELT - MESOZOIC / TURKEY / PONTIDES / ARPAKOY PLUTON		37.8	37.8	40.9	40.9	SAE			s_M11 [24419]	GABBRODIORITE [24419]			UPPER [24419]	CRETACEOUS [24419]	Subduction	0.528846	0.180328	0.19375	16.7213	2			PLU					WR [24419]	54.97	0.72		19.49				7.7	9.36	2.43	0.16		0.33	2.84	0.18
[21788]	CONVERGENT MARGIN	KOHISTAN-LADAKH TERRANE (GANGDISE BELT) / KOHISTAN ARC / SOUTHERN PLUTONIC COMPLEX		73.0606	73.0606	35.1439	35.1439	SAE			s_P06-35 [21788]	GABBRO [21788]				CRETACEOUS [21788]	Subduction	0.220066	0.0659352	0.193175	17.1364	2.97563	7.26551	COARSE GRAINED [21788]	PLU					WR [21788]	53.5022	0.851221		17.361		9.91178	8.81157		9.14964	4.64114	0.196969		0.52558	2.6279	0.138571
[22770]	INTRAPLATE VOLCANICS	ANATOLIA-IRAN BELT - CENOZOIC/QUATERNARY / IRAN / SANANDAJ-SIRJAN ARC / SARDASHT INTRUSION		45.5	45.5	36.5	36.5	SAE			s_VP-8 [22770]	GABBRO [22770]			MIDDLE [22770]	EOCENE [22770]	Subduction	0.0584416	0.0195652	0.192308	11.5217	0.176471			PLU					WR [22770]	50.3	0.97		16.8	0.02			6.61	14.15	7.24	0.14		0.16	2.56	0.1
[24190]	CONVERGENT MARGIN	KOHISTAN-LADAKH TERRANE (GANGDISE BELT) / KOHISTAN ARC / CHILAS COMPLEX		74.1	74.1	35.41	35.41	SAE			s_S25-C [24190]	GABBRO [24190]				CRETACEOUS [24190]	Subduction	0.828025	0.1	0.192126	17.6923	4.59821		EQUIGRANULAR [24190]	PLU					WR [24190]	49.55	0.65		19.76				7.72	9.88	4.46	0.143		0.98	3.2	0.205
[24190]	CONVERGENT MARGIN	KOHISTAN-LADAKH TERRANE (GANGDISE BELT) / KOHISTAN ARC / CHILAS COMPLEX		74.1	74.1	35.41	35.41	SAE			s_S16-A [24190]	GABBRO [24190]				CRETACEOUS [24190]	Subduction	0.621176	0.189928	0.190826	7.91367	1.36504		EQUIGRANULAR [24190]	PLU					WR [24190]	42.56	1.669		12.37				9.19	14.99	7.65	0.143		0.41	1.27	0.588
[23371]	INTRAPLATE VOLCANICS	ANATOLIA-IRAN BELT - MESOZOIC / TURKEY / PONTIDES / GOKCEDERE PLUTON, SAKARYA ZONE		40	40	41	41	SAE			s_GD14 [23371]	GABBRO [23371]			LOWER [23371]	JURASSIC [23371]	Subduction	0.661157	0.235294	0.19	22.3529	8.75	6.85714		PLU					WR [23371]	51.24	0.53		21.03	0.01			5.79	11.51	4.65	0.12		0.3	2.49	0.03
[22770]	INTRAPLATE VOLCANICS	ANATOLIA-IRAN BELT - CENOZOIC/QUATERNARY / IRAN / SANANDAJ-SIRJAN ARC / SARDASHT INTRUSION		45.5	45.5	36.5	36.5	SAE			s_VS-4 [22770]	GABBRO [22770]			MIDDLE [22770]	EOCENE [22770]	Subduction	0.169231	0.0916667	0.183333	15.5833	0.2			PLU					WR [22770]	51.7	0.35		17.4	0.04			5.59	10.85	8.8	0.11		0.07	3.63	0.01
[21788]	CONVERGENT MARGIN	KOHISTAN-LADAKH TERRANE (GANGDISE BELT) / KOHISTAN ARC / SOUTHERN PLUTONIC COMPLEX		73.0103	73.0103	35.1163	35.1163	SAE			s_P06-27B-F [21788]	GABBRO [21788]				CRETACEOUS [21788]	Subduction	0.152217	0.0372197	0.181685	18.6741	1.74435	7.1058		PLU					WR [21788]	52.9723	0.701763		17.8309		8.65573	7.69495		10.1736	4.87292	0.128131		0.440573	2.60598	0.249362
[24760]	INTRAPLATE VOLCANICS	CENTRAL ASIAN FOLDBELT - MESOZOIC / CHINA - MESOZOIC / TIBET	DAZHUKA AREA	89.13	89.4	29.35	29.4	SAE			s_MG3-3-3 [24760]	GABBRO [24760]			UPPER [24760]	CRETACEOUS [24760]	Subduction	0.483618	0.0686507	0.181321	25.0587	6.82669	9.07201		PLU					WR [24760]	45.137	1.328		12.548				13.85	10.137	9.735	0.255		1.43	1.668	0.216
[23371]	INTRAPLATE VOLCANICS	ANATOLIA-IRAN BELT - MESOZOIC / TURKEY / PONTIDES / GOKCEDERE PLUTON, SAKARYA ZONE		40	40	41	41	SAE			s_GD10 [23371]	GABBRO [23371]			LOWER [23371]	JURASSIC [23371]	Subduction	0.744681	0.205882	0.177778	40	11	14.7143		PLU					WR [23371]	52.14	0.64		20.79	0.01			6.76	9.83	3.75	0.12		0.44	3.1	0.03
[19893]	INTRAPLATE VOLCANICS	CARPATHIAN BELT AND PANNONIAN BASIN / EASTERN ALPINE-WESTERN CARPATHIAN-NORTHERN PANNONI / BANAT		21.7319	21.7319	45.0459	45.0459	SAE			s_DG037 [19893]	GABBRO [19893]			UPPER [19893]	CRETACEOUS [19893]	Subduction	1.04065	0.0833333	0.177778	17.237	5.51667	10.7169		PLU					WR [19893]	49.77	0.83		18.02				8.12	11.2	6.4	0.16		0.5	3.17	0.27
[20127]	INTRAPLATE VOLCANICS	CARPATHIAN BELT AND PANNONIAN BASIN / SOUTHERN PANNONIAN-EASTERN CARPATHIAN (TISZA-DACIA / SREDNOGORIE ARC / ELSHITSA PLUTON		24	24	43	43	SAE			s_3/BK28B [20127]	GABBRO [20127]				CRETACEOUS [20127]	Subduction	1.12821	0.166387	0.176667	6.20168	5.5			PLU					WR [20127]	50.68	0.87		18.07		3.7	5.73		11.6	5.38	0.25		0.26	2.24	0.22			0.1
[22935]	INTRAPLATE VOLCANICS	ANATOLIA-IRAN BELT - CENOZOIC/QUATERNARY / IRAN / LUT BLOCK	CHESHMESH KHURI AREA	58.4578	58.4578	33.1856	33.1856	SAE			s_P37 [22935]	GABBRO [22935]			MIDDLE [22935]	EOCENE [22935]	Subduction	1.22807	0.246479	0.176	16.338	10.8667			PLU					WR [22935]	48.99	1.15		17.87				8.94	9.75	5.6	0.16		1.49	2.73	0.36
[24760]	INTRAPLATE VOLCANICS	CENTRAL ASIAN FOLDBELT - MESOZOIC / CHINA - MESOZOIC / TIBET	DAZHUKA AREA	89.13	89.4	29.35	29.4	SAE			s_MG3-3-8 [24760]	GABBRO [24760]			UPPER [24760]	CRETACEOUS [24760]	Subduction	0.631183	0.0770577	0.172391	12.4723	3.51129	9.09011		PLU					WR [24760]	46.94	1.491		14.565				12.25	9.285	7.97	0.218		1.116	2.588	0.288
[22770]	INTRAPLATE VOLCANICS	ANATOLIA-IRAN BELT - CENOZOIC/QUATERNARY / IRAN / SANANDAJ-SIRJAN ARC / SARDASHT INTRUSION		45.5	45.5	36.5	36.5	SAE			s_VP-4 [22770]	GABBRO [22770]			MIDDLE [22770]	EOCENE [22770]	Subduction	0.392405	0.182353	0.171429	12.4706	3			PLU					WR [22770]	49	0.53		16.6	0.1			5.79	15.9	10.5	0.11		0.05	1.5	0.01
[23751]	INTRAPLATE VOLCANICS	CENTRAL ASIAN FOLDBELT - MESOZOIC / CHINA - MESOZOIC / TIBET	SHANBA AREA, NAMLING COUNTY	89	89	29.5	29.5	SAE			s_CT4192 [23751]	GABBRODIORITE [23751]				CRETACEOUS [23751]	Subduction	2.46405	0.240127	0.171429	12.8662	4.5			PLU					WR [23751]	54.64	0.63		18.29				6.58	9.21	4.62	0.2		0.62	3.62	0.3
[22741]	CONVERGENT MARGIN	KOHISTAN-LADAKH TERRANE (GANGDISE BELT) / LADAKH ARC / DRAS UNIT / KARGIL GABBRO	PANDRAS, THROUGH DRAS TO KARGIL ALONG THE SRINAGAR-LEH NATIONAL HIGHWAY	76	76	34.5	34.5	SAE			s_KG4 [22741]	GABBRO [22741]				CRETACEOUS [22741]	Subduction	0.578431	0.144608	0.168831	16.5686	3.6859	11.7627		PLU					WR [22741]	47.91	1.14		16.8				10.11	11.98	7.92	0.13		0.33	2.58	0.07
[24190]	CONVERGENT MARGIN	KOHISTAN-LADAKH TERRANE (GANGDISE BELT) / KOHISTAN ARC / CHILAS COMPLEX		74.1	74.1	35.41	35.41	SAE			s_S11-A [24190]	GABBRO [24190]				CRETACEOUS [24190]	Subduction	0.270455	0.0563314	0.164634	12.071	0.448052		EQUIGRANULAR [24190]	PLU					WR [24190]	51.22	1.064		18.25				8.41	8.95	4.96	0.138		0.27	3.28	0.236
[22770]	INTRAPLATE VOLCANICS	ANATOLIA-IRAN BELT - CENOZOIC/QUATERNARY / IRAN / SANANDAJ-SIRJAN ARC / SARDASHT INTRUSION		45.5	45.5	36.5	36.5	SAE			s_VP-7 [22770]	GABBRO [22770]			MIDDLE [22770]	EOCENE [22770]	Subduction	0.146341	0.0545455	0.1625	11.8182	1.44444			PLU					WR [22770]	48.6	0.6		17.2	0.11			6.05	15.05	10.25	0.11		0.08	1.66	0.03
[22935]	INTRAPLATE VOLCANICS	ANATOLIA-IRAN BELT - CENOZOIC/QUATERNARY / IRAN / LUT BLOCK	CHESHMESH KHURI AREA	58.4481	58.4481	33.18	33.18	SAE			s_P25 [22935]	GABBRODIORITE [22935]			MIDDLE [22935]	EOCENE [22935]	Subduction	1.58451	0.186722	0.160714	15.2282	15.1538			PLU					WR [22935]	52.09	1.21		18.5				8.74	9.12	1.73	0.12		1.82	3.63	0.36
[24760]	INTRAPLATE VOLCANICS	CENTRAL ASIAN FOLDBELT - MESOZOIC / CHINA - MESOZOIC / TIBET	DAZHUKA AREA	89.13	89.4	29.35	29.4	SAE			s_MG3-3-6 [24760]	GABBRO [24760]			UPPER [24760]	CRETACEOUS [24760]	Subduction	0.594075	0.0724766	0.160532	12.1781	3.4391	9.51819		PLU					WR [24760]	46.149	1.383		14.427				12.94	9.781	7.847	0.226		0.975	2.56	0.277
[24760]	INTRAPLATE VOLCANICS	CENTRAL ASIAN FOLDBELT - MESOZOIC / CHINA - MESOZOIC / TIBET	DAZHUKA AREA	89.13	89.4	29.35	29.4	SAE			s_MG3-3-1 [24760]	GABBRO [24760]			UPPER [24760]	CRETACEOUS [24760]	Subduction	0.958104	0.106661	0.160281	25.1716	8.26359	10.6361		PLU					WR [24760]	47.598	1.211		17.966				9.97	8.204	5.114	0.184		1.749	3.409	0.331
[21311]	INTRAPLATE VOLCANICS	ANATOLIA-IRAN BELT - MESOZOIC / IRAN / SANANDAJ-SIRJAN ARC / KHUNRANG INTRUSIVE COMPLEX		58	58	29	29	SAE			s_RZ-4-4 [21311]	GABBRO, PYROXENE-HORNBLENDE [21311]			MIDDLE [21311]	JURASSIC [21311]	Subduction	1.02913	0.207843	0.16	14.3922	7.22222			PLU					WR [21311]	48.3	0.33		22.7				6.87	12.35	7.02	0.12		0.5	1.48	0.03
[24501]	CONVERGENT MARGIN	KOHISTAN-LADAKH TERRANE (GANGDISE BELT) / LADAKH ARC / KARGIL INTRSUIVE SUITE		76.1379	76.1379	34.5508	34.5508	SAE			s_17KG05 [24501]	GABBRO [24501]			UPPER [24501]	JURASSIC [24501]	Subduction	0.28125	0.12	0.16	33.3333	3.33333	9.36455		PLU					WR [24501]	47.41	0.7461		18.33				9.34	11.94	8.158	0.1513		0.0985	1.479	0.03549
[25053]	INTRAPLATE VOLCANICS	ANATOLIA-IRAN BELT - MESOZOIC / TURKEY / PONTIDES	YUSUFELI INTRUSIVE COMPLEX	41.6728	41.6728	40.8407	40.8407	SAE			s_16TK32-3 [25053]	GABBRO, HORNBLENDE [25053]				JURASSIC [25053]	Subduction	1.03774	0.2	0.155963	32.7273	7.7439	4.73186		PLU					WR [25053]	50.93	0.45		17.68				6.09	11.52	7.76	0.12		0.69	2.43	0.08
[24501]	CONVERGENT MARGIN	KOHISTAN-LADAKH TERRANE (GANGDISE BELT) / LADAKH ARC / KARGIL INTRSUIVE SUITE		76.1253	76.1253	34.5061	34.5061	SAE			s_17KG03 [24501]	GABBRO [24501]			UPPER [24501]	JURASSIC [24501]	Subduction	0.357798	0.118182	0.155556	42.4242	5.6	9.30736		PLU					WR [24501]	50.99	0.893		19.23				7.46	9.49	5.021	0.1266		0.5218	2.93	0.1199
[22904]	INTRAPLATE VOLCANICS	CENTRAL ASIAN FOLDBELT - MESOZOIC / CHINA - MESOZOIC / TIBET / CUIJIU IGENOUS COMPLEX		92.6954	92.6954	29.209	29.209	SAE			s_11CJ06-4 [22904]	GABBRODIORITE [22904]			LOWER [22904]	MESOZOIC [22904]	Subduction	0.763158	0.136792	0.154321	11.1321	6.17424	10.578		PLU					WR [22904]	54.3	0.71		19.5				6.24	8.1	3.93	0.11		0.61	4.4	0.22
[24190]	CONVERGENT MARGIN	KOHISTAN-LADAKH TERRANE (GANGDISE BELT) / KOHISTAN ARC / CHILAS COMPLEX		74.1	74.1	35.41	35.41	SAE			s_S24-A [24190]	GABBRO [24190]				CRETACEOUS [24190]	Subduction	0.173707	0.0294161	0.153846	15.6934	2.10843		EQUIGRANULAR [24190]	PLU					WR [24190]	54.01	1.05		17.19				8.6	8.36	4.21	0.149		0.79	3.1	0.223
[24190]	CONVERGENT MARGIN	KOHISTAN-LADAKH TERRANE (GANGDISE BELT) / KOHISTAN ARC / CHILAS COMPLEX		74.1	74.1	35.41	35.41	SAE			s_S8-B [24190]	GABBRO [24190]				CRETACEOUS [24190]	Subduction	0.455612	0.0725426	0.152792	13.3225	2.20621		EQUIGRANULAR [24190]	PLU					WR [24190]	54.6	0.906		17.02				7.91	7.94	4.77	0.139		0.71	3.21	0.293
[22935]	INTRAPLATE VOLCANICS	ANATOLIA-IRAN BELT - CENOZOIC/QUATERNARY / IRAN / LUT BLOCK	CHESHMESH KHURI AREA	58.4586	58.4586	33.1756	33.1756	SAE			s_P15 [22935]	GABBRO [22935]			MIDDLE [22935]	EOCENE [22935]	Subduction	1.41079	0.255639	0.152174	18.0451	11.7097			PLU					WR [22935]	48.13	1.18		16.36				9.18	10.71	6.83	0.18		1.85	2.59	0.46
[24760]	INTRAPLATE VOLCANICS	CENTRAL ASIAN FOLDBELT - MESOZOIC / CHINA - MESOZOIC / TIBET	DAZHUKA AREA	89.13	89.4	29.35	29.4	SAE			s_MG3-3-21 [24760]	GABBRO [24760]			UPPER [24760]	CRETACEOUS [24760]	Subduction	0.889639	0.0821988	0.149892	17.4827	5.16322	12.1726		PLU					WR [24760]	47.859	1.164		18.565				10.24	9.431	5.105	0.176		1.189	3.272	0.336
[24190]	CONVERGENT MARGIN	KOHISTAN-LADAKH TERRANE (GANGDISE BELT) / KOHISTAN ARC / CHILAS COMPLEX		74.1	74.1	35.41	35.41	SAE			s_S9-B [24190]	GABBRO [24190]				CRETACEOUS [24190]	Subduction	0.226087	0.0434692	0.149198	23.511	4.81884		EQUIGRANULAR [24190]	PLU					WR [24190]	52.02	0.837		17.32				7.85	8.88	4.77	0.136		0.97	3.39	0.163
[21311]	INTRAPLATE VOLCANICS	ANATOLIA-IRAN BELT - MESOZOIC / IRAN / SANANDAJ-SIRJAN ARC / KHUNRANG INTRUSIVE COMPLEX		58	58	29	29	SAE			s_SS-11 [21311]	GABBRO, PYROXENE-HORNBLENDE [21311]			MIDDLE [21311]	JURASSIC [21311]	Subduction	0.375	0.177778	0.146154	10.2593	4.18182			PLU					WR [21311]	44.1	0.55		19.75				8.88	11.6	10.05	0.13		0.3	1.5	0.02
[24235]	INTRAPLATE VOLCANICS	ANATOLIA-IRAN BELT - CENOZOIC/QUATERNARY / IRAN / SANANDAJ-SIRJAN ARC / PASEVH PLUTON		46	46	37	37	SAE			s_P13 [24235]	GABBRO [24235]				EOCENE [24235]	Subduction	0.228604	0.0630918	0.145977	9.83509	0.582239	4.8638		PLU					WR [24235]	50.87	0.86		18.43				6.31	12.05	5.87	0.124		0.46	3.31	0.13
[22935]	INTRAPLATE VOLCANICS	ANATOLIA-IRAN BELT - CENOZOIC/QUATERNARY / IRAN / LUT BLOCK	CHESHMESH KHURI AREA	58.4556	58.4556	33.1775	33.1775	SAE			s_P17 [22935]	GABBRO [22935]			MIDDLE [22935]	EOCENE [22935]	Subduction	1.42276	0.246479	0.145833	17.8873	10.9118			PLU					WR [22935]	48.81	1.15		18.24				9.12	10.11	5.46	0.18		1.72	2.8	0.38
[24190]	CONVERGENT MARGIN	KOHISTAN-LADAKH TERRANE (GANGDISE BELT) / KOHISTAN ARC / CHILAS COMPLEX		74.1	74.1	35.41	35.41	SAE			s_S10-A [24190]	GABBRO [24190]				CRETACEOUS [24190]	Subduction	0.330396	0.0707547	0.144444	18.5849	4.14815		EQUIGRANULAR [24190]	PLU					WR [24190]	54.28	0.786		16.89				8.67	8.26	5.17	0.149		0.86	3.33	0.197
[16314]	INTRAPLATE VOLCANICS	ANATOLIA-IRAN BELT - CENOZOIC/QUATERNARY / IRAN / ALBORZ MOUNTAINS / KARAJ FORMATION		48	52	34	36	SAE			s_BA-13-1B [16314]	GABBRO [16314]				EOCENE [16314]	Subduction	1.04054	0.149515	0.141176	24.0777	6.23529			PLU					WR [16314]	48	0.96		12.15				9.09	9.83	13.65	0.16		1.24	1.7	0.19
[24190]	CONVERGENT MARGIN	KOHISTAN-LADAKH TERRANE (GANGDISE BELT) / KOHISTAN ARC / CHILAS COMPLEX		74.1	74.1	35.41	35.41	SAE			s_S16-D [24190]	GABBRO [24190]				CRETACEOUS [24190]	Subduction	0.355039	0.0796522	0.140146	15.3043	5.33537		EQUIGRANULAR [24190]	PLU					WR [24190]	54.57	0.769		16.69				7.14	8.97	4.16	0.116		0.99	3.62	0.185
[16314]	INTRAPLATE VOLCANICS	ANATOLIA-IRAN BELT - CENOZOIC/QUATERNARY / IRAN / ALBORZ MOUNTAINS / KARAJ FORMATION		48	52	34	36	SAE			s_S3 [16314]	GABBRO [16314]				EOCENE [16314]	Subduction	1.1	0.142857	0.14	22.0779	4.22857			PLU					WR [16314]	45.86	1.64		11.77				14.17	10.36	9.94	0.23		1.33	1.69	0.26
[21311]	INTRAPLATE VOLCANICS	ANATOLIA-IRAN BELT - MESOZOIC / IRAN / SANANDAJ-SIRJAN ARC / KHUNRANG INTRUSIVE COMPLEX		58	58	29	29	SAE			s_FD-9 [21311]	GABBRO, PYROXENE-HORNBLENDE [21311]			MIDDLE [21311]	JURASSIC [21311]	Subduction	0.798942	0.181928	0.14	14.0964	7.96296			PLU					WR [21311]	49.2	0.58		19.4				7.96	10.1	5.48	0.12		0.66	2.95	0.07
[22904]	INTRAPLATE VOLCANICS	CENTRAL ASIAN FOLDBELT - MESOZOIC / CHINA - MESOZOIC / TIBET / CUIJIU IGENOUS COMPLEX		92.6638	92.6638	29.1633	29.1633	SAE			s_16CJ17-9 [22904]	GABBRO, HORNBLENDE [22904]			LOWER [22904]	MESOZOIC [22904]	Subduction	0.919708	0.136808	0.137681	13.8979	16.1963	13.5714	CUMULATE [22904]	PLU					WR [22904]	44.3	1.13		18.9				10.71	10.9	6.19	0.13		1.47	2.34	0.34
[16314]	INTRAPLATE VOLCANICS	ANATOLIA-IRAN BELT - CENOZOIC/QUATERNARY / IRAN / ALBORZ MOUNTAINS / KARAJ FORMATION		48	52	34	36	SAE			s_B9 [16314]	GABBRO [16314]				EOCENE [16314]	Subduction	1.13986	0.145536	0.1375	23.6607	7			PLU					WR [16314]	48.3	0.8		15.4				9.04	10.55	8.09	0.17		1.68	2.01	0.24
[22313]	INTRAPLATE VOLCANICS	ANATOLIA-IRAN BELT - MESOZOIC / IRAN / SANANDAJ-SIRJAN ARC / GORVEH PLUTONIC COMPLEX	GORVEH PLUTON	48	48	35	35	SAE			s_14S3-7 [22313]	GABBRO [22313]				JURASSIC [22313]	Subduction	1.55714	0.311429	0.137168	12.381	3.15315	9.41748		PLU					WR [22313]	50.04	1.25		16.34		2.27	6.7		10.44	7.54	0.15		0.85	2.9	0.18		0.96
[23371]	INTRAPLATE VOLCANICS	ANATOLIA-IRAN BELT - MESOZOIC / TURKEY / PONTIDES / GOKCEDERE PLUTON, SAKARYA ZONE		40	40	41	41	SAE			s_GD13 [23371]	GABBRO [23371]			LOWER [23371]	JURASSIC [23371]	Subduction	1.27273	0.318182	0.133333	27.2727	10.3846	11.05		PLU					WR [23371]	51.57	0.61		23.03	0			5.38	10.91	2.55	0.09		0.67	2.76	0.04
[23751]	INTRAPLATE VOLCANICS	CENTRAL ASIAN FOLDBELT - MESOZOIC / CHINA - MESOZOIC / TIBET	SHANBA AREA, NAMLING COUNTY	89	89	29.5	29.5	SAE			s_CT418 [23751]	GABBRODIORITE [23751]				CRETACEOUS [23751]	Subduction	1.56435	0.179357	0.13217	13.1247	1.76468			PLU					WR [23751]	46.1975	1.1235		20.1672				8.71	11.9514	6.2963	0.1212		0.394	2.0254	0.1401
[22904]	INTRAPLATE VOLCANICS	CENTRAL ASIAN FOLDBELT - MESOZOIC / CHINA - MESOZOIC / TIBET / CUIJIU IGENOUS COMPLEX		92.7	92.7	29.2	29.2	SAE			s_11CJ13-1 [22904]	GABBRO, HORNBLENDE [22904]			LOWER [22904]	MESOZOIC [22904]	Subduction	0.38342	0.0857474	0.128866	15.8749	4.59559	9.48413	NON-CUMULATE [22904]	PLU					WR [22904]	51.1	1.05		17.9				7.39	9.06	6.59	0.14		0.71	3.34	0.19
[21684]	CONVERGENT MARGIN	KOHISTAN-LADAKH TERRANE (GANGDISE BELT) / KOHISTAN ARC / CHILAS COMPLEX		74.1629	74.1629	35.5542	35.5542	SAE			s_C83 [21684]	GABBRONORITE, OLIVINE [21684]				MESOZOIC [21684]	Subduction	0.269231	0.12069	0.126667	51.7241	2.5			PLU					WR [21684]	43.54	0.172		19.23				8.03	12.26	13.05	0.125		0.1	1.01	0.02
[20127]	INTRAPLATE VOLCANICS	CARPATHIAN BELT AND PANNONIAN BASIN / SOUTHERN PANNONIAN-EASTERN CARPATHIAN (TISZA-DACIA / SREDNOGORIE ARC	ELATSITE PORPHYRY COPPER DEPOSIT	24	24	43	43	SAE			s_E/42-G [20127]	GABBRO [20127]				CRETACEOUS [20127]	Subduction	1.97275	0.210649	0.125	33.023	15.2941			PLU					WR [20127]	51.94	1.13		16.54		3.2	6.64		5.86	4.73	0.51		3.53	2.78	0.31			0.21
[18045]	INTRAPLATE VOLCANICS	ANATOLIA-IRAN BELT - CENOZOIC/QUATERNARY / IRAN / LUT BLOCK	N OF GARIG GAN	58.9619	58.9619	31.6281	31.6281	SUBAERIAL			s 07-28 [18045]	BASALT [18045]				PALEOGENE [18045]	Subduction	2.42268	0.237374	0.123967	29.1414	15.3286	14.3158	HBL-PHYRIC, SOME HBL OXIDIZED, MICROLITIC TO VITRIC GROUNDMASS [18045]	VOLCANIC ROCK					WHOLE_ROCK [18045]	53.44	0.75		17.55				6.99	8.51	3.44	0.12		2.98	3.37	0.47
[23751]	INTRAPLATE VOLCANICS	CENTRAL ASIAN FOLDBELT - MESOZOIC / CHINA - MESOZOIC / TIBET	SHANBA AREA, NAMLING COUNTY	89	89	29.5	29.5	SAE			s_CT316 [23751]	GABBRODIORITE [23751]				CRETACEOUS [23751]	Subduction	1.04762	0.135385	0.118182	19.0769	5.33333			PLU					WR [23751]	45.03	1.33		17.52				12.71	12.3	6.93	0.16		0.52	1.47	0.11
[25053]	INTRAPLATE VOLCANICS	ANATOLIA-IRAN BELT - MESOZOIC / TURKEY / PONTIDES	CAMLIKAYA INTRUSIVE COMPLEX	41.1273	41.1273	40.6867	40.6867	SAE			s_16TK48-2 [25053]	GABBRODIORITE [25053]				JURASSIC [25053]	Subduction	1.56436	0.287273	0.116732	28.9091	3.94			PLU					WR [25053]	53.39			19.02				73.78	6.57	3.68	0.15		1.44
[19893]	INTRAPLATE VOLCANICS	CARPATHIAN BELT AND PANNONIAN BASIN / EASTERN ALPINE-WESTERN CARPATHIAN-NORTHERN PANNONI / BANAT		21.6114	21.6114	45.234	45.234	SAE			s_DG034 [19893]	GABBRO [19893]			UPPER [19893]	CRETACEOUS [19893]	Subduction	3.0892	0.216305	0.116732	20.0345	10.8974	12.0976		PLU					WR [19893]	51.13	1.12		17.52				8.96	8.21	4.57	0.15		1.96	3.58	0.45
[21684]	CONVERGENT MARGIN	KOHISTAN-LADAKH TERRANE (GANGDISE BELT) / KOHISTAN ARC / CHILAS COMPLEX		73.8556	73.8556	35.4806	35.4806	SAE			s_C 141 [21684]	GABBRONORITE [21684]				MESOZOIC [21684]	Subduction	0.208092	0.0455696	0.115909	19.7468	2			PLU					WR [21684]	55.69	0.821		18.41				7.14	8.32	4.34	0.133		0.53	3.73	0.15
[24190]	CONVERGENT MARGIN	KOHISTAN-LADAKH TERRANE (GANGDISE BELT) / KOHISTAN ARC / CHILAS COMPLEX		74.1	74.1	35.41	35.41	SAE			s_S-39 [24190]	GABBRO [24190]				CRETACEOUS [24190]	Subduction	0.365031	0.0508113	0.113953	18.3604	2.73256		EQUIGRANULAR [24190]	PLU					WR [24190]	50.48	0.95		19.36				9.7	8.94	6.15	0.166		0.12	2.69	0.141
[19893]	INTRAPLATE VOLCANICS	CARPATHIAN BELT AND PANNONIAN BASIN / EASTERN ALPINE-WESTERN CARPATHIAN-NORTHERN PANNONI / BANAT		21.7724	21.7724	45.3412	45.3412	SAE			s_DG031 [19893]	GABBRO [19893]			UPPER [19893]	CRETACEOUS [19893]	Subduction	2.43523	0.196653	0.113924	10.3259	3.51091	9.04498	PORPHYRITIC [19893]	PLU					WR [19893]	49.87	1.28		16.62				7.23	11.5	6.56	0.21		0.86	3.28	0.25
[23751]	INTRAPLATE VOLCANICS	CENTRAL ASIAN FOLDBELT - MESOZOIC / CHINA - MESOZOIC / TIBET	SHANBA AREA, NAMLING COUNTY	89	89	29.5	29.5	SAE			s_CT4191 [23751]	GABBRODIORITE [23751]				CRETACEOUS [23751]	Subduction	1.18447	0.122	0.113333	18.35	4.33333			PLU					WR [23751]	48.13	0.63		17.62				8.87	10.4	8.27	0.18		0.6	2.28	0.06
[24264]	INTRAPLATE VOLCANICS	ANATOLIA-IRAN BELT - MESOZOIC / IRAN / URUMIEH-DOKHTAR ARC	OSHNAVIEH COMPLEX	45	45.5	37	37.5	SAE			s_OS13-64 [24264]	GABBRO [24264]			UPPER [24264]	CRETACEOUS [24264]	Subduction	1.18577	0.15544	0.111429	5.07772	0.45283	3.74648		PLU					WR [24264]	50.26	0.96		10.05				8.84	14.22	10.72	0.21		0.35	1.91	0.12
[23751]	INTRAPLATE VOLCANICS	CENTRAL ASIAN FOLDBELT - MESOZOIC / CHINA - MESOZOIC / TIBET	SHANBA AREA, NAMLING COUNTY	89	89	29.5	29.5	SAE			s_CT417 [23751]	GABBRODIORITE [23751]				CRETACEOUS [23751]	Subduction	1.43906	0.158682	0.110411	18.4563	4.44935			PLU					WR [23751]	47.8455	0.4951		19.1716				7.78	10.1628	9.0362	0.1359		0.5403	2.1167	0.0991
[19408]	INTRAPLATE VOLCANICS	ANATOLIA-IRAN BELT - CENOZOIC/QUATERNARY / IRAN / DAVARZAN-ABBASABAD VOLCANIC BELT		57	57	36	36	SUBAERIAL			s S4 [19408]	BASALT [19408]				EOCENE [19408]	Subduction	1.22995	0.17037	0.107692	17.9259	8.25	8.2973		VOLCANIC ROCK					WHOLE_ROCK [19408]	48.04	1		17.44	0.009			9.03	10.26	6.06	0.16		2.01	2.82	0.3
[16314]	INTRAPLATE VOLCANICS	ANATOLIA-IRAN BELT - CENOZOIC/QUATERNARY / IRAN / ALBORZ MOUNTAINS / KARAJ FORMATION		48	52	34	36	SAE			s_GAR-2 [16314]	GABBRO [16314]				EOCENE [16314]	Subduction	2.56034	0.241463	0.10625	23.252	3.63636			PLU					WR [16314]	52.8	0.97		17.56				7.42	11.23	4.29	0.19		1.62	2.85	0.28
[19408]	INTRAPLATE VOLCANICS	ANATOLIA-IRAN BELT - CENOZOIC/QUATERNARY / IRAN / DAVARZAN-ABBASABAD VOLCANIC BELT		57	57	36	36	SUBAERIAL			s S20 [19408]	BASALT [19408]				EOCENE [19408]	Subduction	2.06278	0.172932	0.10625	13.6466	1.17453	9.12121		VOLCANIC ROCK					WHOLE_ROCK [19408]	48.54	1.35		16.01	0.009			9.09	9.9	5.95	0.18		1.59	3.93	0.44
[24190]	CONVERGENT MARGIN	KOHISTAN-LADAKH TERRANE (GANGDISE BELT) / KOHISTAN ARC / CHILAS COMPLEX		74.1	74.1	35.41	35.41	SAE			s_S5-B [24190]	GABBRO [24190]				CRETACEOUS [24190]	Subduction	0.327027	0.0581731	0.103636	16.8269	0.967985		EQUIGRANULAR [24190]	PLU					WR [24190]	53.18	1.303		16.53				8.54	8.59	5.03	0.156		0.62	3.55	0.318
[18045]	INTRAPLATE VOLCANICS	ANATOLIA-IRAN BELT - CENOZOIC/QUATERNARY / IRAN / LUT BLOCK	NE OF MOOD	59.5322	59.5322	32.7186	32.7186	SUBAERIAL			s 07-50 [18045]	BASALT [18045]				PALEOGENE [18045]	Subduction	3.80272	0.170948	0.101382	11.8043	3.05556	6.18519	OL-PHYRIC, OL, PL AND SOME CPX IN MICROLITIC GROUNDMASS [18045]	VOLCANIC ROCK					WHOLE_ROCK [18045]	48.97	0.91		13.7				7.93	8.53	11.77	0.15		1.59	3.78	0.31
[18045]	INTRAPLATE VOLCANICS	ANATOLIA-IRAN BELT - CENOZOIC/QUATERNARY / IRAN / LUT BLOCK	N OF MAHOOSK	59.4356	59.4356	33.1683	33.1683	SUBAERIAL			s 08-Z-11 [18045]	BASALT [18045]				PALEOGENE [18045]	Subduction	3.6129	0.176101	0.100437	15.7862	2.31111	8.66995	OL PHYRIC, OL, PL AND SOME CPX IN MICROLITIC GROUNDMASS [18045]	VOLCANIC ROCK					WHOLE_ROCK [18045]	49.01	0.94		13.71				7.98	8.4	11.64	0.15		1.58	3.63	0.3
[23751]	INTRAPLATE VOLCANICS	CENTRAL ASIAN FOLDBELT - MESOZOIC / CHINA - MESOZOIC / TIBET	SHANBA AREA, NAMLING COUNTY	89	89	29.5	29.5	SAE			s_CT414 [23751]	GABBRODIORITE [23751]				CRETACEOUS [23751]	Subduction	0.979592	0.111628	0.1	14.7674	1.78788			PLU					WR [23751]	46.26	1.02		20.39				9.27	12.4	6.41	0.13		0.39	2	0.11
[21787]	CONVERGENT MARGIN	KOHISTAN-LADAKH TERRANE (GANGDISE BELT) / KOHISTAN ARC / CHILAS COMPLEX	HODA RIVER	73	73	35	35	SAE			s_92CH-114 [21787]	GABBRONORITE [21787]				CRETACEOUS [21787]	Subduction	0.769231	0.142857	0.1	25.7143	3			PLU					WR [21787]	54.43	0.97		17.47				7.99	8.69	4.98	0.14		0.72	3.5	0.22
[21787]	CONVERGENT MARGIN	KOHISTAN-LADAKH TERRANE (GANGDISE BELT) / KOHISTAN ARC / CHILAS COMPLEX	KINER RIVER	73	73	35	35	SAE			s_92CH-91 [21787]	GABBRONORITE [21787]				CRETACEOUS [21787]	Subduction	0.666667	0.142857	0.1	25.7143	3			PLU					WR [21787]	54.06	0.86		18.65				8.07	8.59	4.36	0.14		0.62	3.55	0.18
[21787]	CONVERGENT MARGIN	KOHISTAN-LADAKH TERRANE (GANGDISE BELT) / KOHISTAN ARC / CHILAS COMPLEX	THOR RIVER	73	73	35	35	SAE			s_92CH-59 [21787]	GABBRO, HORNBLENDE [21787]				CRETACEOUS [21787]	Subduction	0.625	0.2	0.1	32	1			PLU					WR [21787]	54.68	0.84		17.77				8.04	9.37	4.59	0.16		0.31	3.03	0.14
[19408]	INTRAPLATE VOLCANICS	ANATOLIA-IRAN BELT - CENOZOIC/QUATERNARY / IRAN / DAVARZAN-ABBASABAD VOLCANIC BELT		57	57	36	36	SUBAERIAL			s S12 [19408]	ANDESITE, BASALTIC [19408]				EOCENE [19408]	Subduction	1.2963	0.164062	0.1	23.3594	3.16667	11.2273		VOLCANIC ROCK					WHOLE_ROCK [19408]	54.22	0.59		18.17	0.004			6.96	7.8	3.45	0.17		0.82	4.68	0.19
[16314]	INTRAPLATE VOLCANICS	ANATOLIA-IRAN BELT - CENOZOIC/QUATERNARY / IRAN / ALBORZ MOUNTAINS / KARAJ FORMATION		48	52	34	36	SAE			s_M11 [16314]	GABBRO [16314]				EOCENE [16314]	Subduction	1.5	0.162162	0.1	19.1351	4.94286			PLU					WR [16314]	45.42	1.79		11.81				14.63	10.47	10.1	0.24		1.44	1.94	0.43
[21311]	INTRAPLATE VOLCANICS	ANATOLIA-IRAN BELT - MESOZOIC / IRAN / SANANDAJ-SIRJAN ARC / KHUNRANG INTRUSIVE COMPLEX		58	58	29	29	SAE			s_RZ-2 [21311]	GABBRO, PYROXENE-HORNBLENDE [21311]			MIDDLE [21311]	JURASSIC [21311]	Subduction	1.13208	0.157895	0.1	9.32895	14.3846			PLU					WR [21311]	48.8	0.39		15.85				10.05	11.05	9.2	0.17		0.63	2.09	0.09
[23751]	INTRAPLATE VOLCANICS	CENTRAL ASIAN FOLDBELT - MESOZOIC / CHINA - MESOZOIC / TIBET	SHANBA AREA, NAMLING COUNTY	89	89	29.5	29.5	SAE			s_CT314 [23751]	GABBRODIORITE [23751]				CRETACEOUS [23751]	Subduction	1.01351	0.0872093	0.1	11.6279	2.92308			PLU					WR [23751]	46.29	0.83		21.47				9.03	12.7	5.45	0.13		0.39	1.78	0.06
[25053]	INTRAPLATE VOLCANICS	ANATOLIA-IRAN BELT - MESOZOIC / TURKEY / PONTIDES	CAMLIKAYA INTRUSIVE COMPLEX	41.1764	41.1764	40.6338	40.6338	SAE			s_16TK53-3 [25053]	GABBRODIORITE [25053]				JURASSIC [25053]	Subduction	2.55396	0.219136	0.0995671	4.62963	3.51485	0.222222		PLU					WR [25053]	55.32	0.75		18.11				5.56	8.28	5.11	0.09		1.11	3.62	0.19
[21788]	CONVERGENT MARGIN	KOHISTAN-LADAKH TERRANE (GANGDISE BELT) / KOHISTAN ARC / SOUTHERN PLUTONIC COMPLEX		73.0103	73.0103	35.1163	35.1163	SAE			s_P06-27B-G* [21788]	GABBRO [21788]				CRETACEOUS [21788]	Subduction	0.0570741	0.0218646	0.0989679	4.18239	0.0288924	16.1772		PLU					WR [21788]	44.4833	6.20064		15.205		17.7145	15.7482		8.6783	5.30928	0.602216		0.191433	0.780688	0.127622
[21788]	CONVERGENT MARGIN	KOHISTAN-LADAKH TERRANE (GANGDISE BELT) / KOHISTAN ARC / SOUTHERN PLUTONIC COMPLEX		73.0103	73.0103	35.1163	35.1163	SAE			s_P06-27B-G [21788]	GABBRO [21788]				CRETACEOUS [21788]	Subduction	0.081374	0.031198	0.0967213	4.68339	0.031229	16.5829		PLU					WR [21788]	44.2107	6.04161		15.2292		17.4767	15.5368		8.61321	5.30772	0.593292		0.18746	0.691011	0.12863
[23751]	INTRAPLATE VOLCANICS	CENTRAL ASIAN FOLDBELT - MESOZOIC / CHINA - MESOZOIC / TIBET	SHANBA AREA, NAMLING COUNTY	89	89	29.5	29.5	SAE			s_CT318 [23751]	GABBRODIORITE [23751]				CRETACEOUS [23751]	Subduction	0.845238	0.112698	0.0923077	18.8889	4.10526			PLU					WR [23751]	44.25	1.4		16.14				13.4	12.2	7.76	0.18		0.48	1.25	0.09
[16314]	INTRAPLATE VOLCANICS	ANATOLIA-IRAN BELT - CENOZOIC/QUATERNARY / IRAN / ALBORZ MOUNTAINS / KARAJ FORMATION		48	52	34	36	SAE			s_BA-11-1 [16314]	GABBRO [16314]				EOCENE [16314]	Subduction	1.94884	0.161154	0.0918919	17.7692	2.15323			PLU					WR [16314]	50.1	1.18		16.95				8.85	9.56	5.94	0.17		1.32	2.91	0.24
[19408]	INTRAPLATE VOLCANICS	ANATOLIA-IRAN BELT - CENOZOIC/QUATERNARY / IRAN / DAVARZAN-ABBASABAD VOLCANIC BELT		57	57	36	36	SUBAERIAL			s S9 [19408]	BASALT [19408]				EOCENE [19408]	Subduction	1.88034	0.166038	0.0916667	13.5094	1.35047	8.68571		VOLCANIC ROCK					WHOLE_ROCK [19408]	48.45	1.36		16.07	0.01			9.06	9.49	6.06	0.18		1.79	3.92	0.44
[16314]	INTRAPLATE VOLCANICS	ANATOLIA-IRAN BELT - CENOZOIC/QUATERNARY / IRAN / ALBORZ MOUNTAINS / KARAJ FORMATION		48	52	34	36	SAE			s_BA-13-2A [16314]	GABBRO [16314]				EOCENE [16314]	Subduction	2.08584	0.169338	0.0883721	15.331	2.42537			PLU					WR [16314]	50.7	1.34		17.6				9.72	9.36	4.95	0.18		1.52	3.06	0.24
[22043]	INTRAPLATE VOLCANICS	ANATOLIA-IRAN BELT - MESOZOIC / IRAN / SANANDAJ-SIRJAN ARC / PANJEH		47.5403	47.5403	35.1119	35.1119	SAE			s_IR-P26 [22043]	GABBRO [22043]			UPPER [22043]	JURASSIC [22043]	Subduction	0.721311	0.090411	0.0878049	1.70548	0.570253			PLU					WR [22043]	56.9	1.05		16.8				6.06	4.34	2.4	0.14		3.71	5.5	0.34
[18045]	INTRAPLATE VOLCANICS	ANATOLIA-IRAN BELT - CENOZOIC/QUATERNARY / IRAN / LUT BLOCK	N OF MAHOOSK	59.4356	59.4356	33.1683	33.1683	SUBAERIAL			s 08-Z-10 [18045]	BASALT [18045]				PALEOGENE [18045]	Subduction	1.07265	0.127411	0.0851064	25.533	1.87755	14.7561	OL-CPX-PHYRIC, OL, PL AND SOME CPX IN MICROLITIC GROUNDMASS [18045]	VOLCANIC ROCK					WHOLE_ROCK [18045]	53.84	1.25		17.71				6.65	8.26	5.3	0.13		1.26	3.61	0.36
[21632]	CONTINENTAL FLOOD BASALT	COMEI LARGE IGNEOUS PROVINCE / COMEI LARGE IGNEOUS PROVINCE / DALA DIABASE INTRUSION	SOUTH TIBET	92.22	92.22	28.62	28.62	SAE			s_T0766-3 [21632]	DIABASE [21632]			LOWER [21632]	CRETACEOUS [21632]	Subduction	1.77604	0.233562	0.0780347	11.9863	8.40909	6.85714		PLU					WR [21632]	49.6	1.5		12.6				9.5	9.7	11	0.2		1.1	1.5	0.2
[21632]	CONTINENTAL FLOOD BASALT	COMEI LARGE IGNEOUS PROVINCE / COMEI LARGE IGNEOUS PROVINCE / DALA DIABASE INTRUSION	SOUTH TIBET	92.22	92.22	28.62	28.62	SAE			s_T0766-7 [21632]	DIABASE [21632]			LOWER [21632]	CRETACEOUS [21632]	Subduction	1.88208	0.226705	0.0772947	7.84091	6.1125	8.1875		PLU					WR [21632]	49.2	1.8		12				10.4	9.6	11	0.2		1	1.7	0.2
[21632]	CONTINENTAL FLOOD BASALT	COMEI LARGE IGNEOUS PROVINCE / COMEI LARGE IGNEOUS PROVINCE / DALA DIABASE INTRUSION	SOUTH TIBET	92.22	92.22	28.62	28.62	SAE			s_T0766-4 [21632]	DIABASE [21632]			LOWER [21632]	CRETACEOUS [21632]	Subduction	1.84409	0.230201	0.0760563	11.1409	7.59677	6.6875		PLU					WR [21632]	49.4	1.5		11.9				9.7	9.9	11.8	0.2		1	1.6	0.2
[21632]	CONTINENTAL FLOOD BASALT	COMEI LARGE IGNEOUS PROVINCE / COMEI LARGE IGNEOUS PROVINCE / DALA DIABASE INTRUSION	SOUTH TIBET	92.22	92.22	28.62	28.62	SAE			s_T0766-8 [21632]	DIABASE [21632]			LOWER [21632]	CRETACEOUS [21632]	Subduction	1.61132	0.221244	0.0756303	9.01554	5.27451	8.34483		PLU					WR [21632]	49.4	1.7		11.8				10.5	9.3	11.6	0.2		0.9	1.7	0.2
[21632]	CONTINENTAL FLOOD BASALT	COMEI LARGE IGNEOUS PROVINCE / COMEI LARGE IGNEOUS PROVINCE / DALA DIABASE INTRUSION	SOUTH TIBET	92.22	92.22	28.62	28.62	SAE			s_T0766-2 [21632]	DIABASE [21632]			LOWER [21632]	CRETACEOUS [21632]	Subduction	1.79592	0.225641	0.0745856	6.92308	5.27692	6.51515		PLU					WR [21632]	49.2	1.5		12				9	9.9	11.4	0.2		0.8	1.9	0.2
[21632]	CONTINENTAL FLOOD BASALT	COMEI LARGE IGNEOUS PROVINCE / COMEI LARGE IGNEOUS PROVINCE / DALA DIABASE INTRUSION	SOUTH TIBET	92.22	92.22	28.62	28.62	SAE			s_T0766-11 [21632]	DIABASE [21632]			LOWER [21632]	CRETACEOUS [21632]	Subduction	1.73485	0.20724	0.0745698	1.9457	0.480769	9.73333		PLU					WR [21632]	50.7	2.4		13.9				10.6	9.3	7.3	0.2		0.1	2.6	0.3
[20557]	INTRAPLATE VOLCANICS	CENTRAL ASIAN FOLDBELT - MESOZOIC / CHINA - MESOZOIC / TIBET	DUOBUZA ORE DISTRICT, GERZE AREA, WESTERN QIANGTANG SUBTERRANE	84.4324	84.4324	32.8386	32.8386	SAE			s_10DB11 [20557]	DIABASE [20557]	156000000 [20557]	156000000 [20557]		JURASSIC [20557]	Subduction	1.68067	0.122699	0.0713415	2.57669	0.755906	7.30671		PLU					WR [20557]	48.6978	3.50983		17.0115				12.87	4.91568	6.58081	0.134953		0.73002	3.57678	0.542999
[21632]	CONTINENTAL FLOOD BASALT	COMEI LARGE IGNEOUS PROVINCE / COMEI LARGE IGNEOUS PROVINCE / DALA DIABASE INTRUSION	SOUTH TIBET	92.22	92.22	28.62	28.62	SAE			s_T0766-14 [21632]	DIABASE [21632]			LOWER [21632]	CRETACEOUS [21632]	Subduction	1.98322	0.228185	0.0711974	8.10811	3.104	12.3226		PLU					WR [21632]	50.8	3.5		14.6				10.8	8.7	4.8	0.2		1.1	2.6	0.3
[21632]	CONTINENTAL FLOOD BASALT	COMEI LARGE IGNEOUS PROVINCE / COMEI LARGE IGNEOUS PROVINCE / DALA DIABASE INTRUSION	SOUTH TIBET	92.22	92.22	28.62	28.62	SAE			s_T0766-5 [21632]	DIABASE [21632]			LOWER [21632]	CRETACEOUS [21632]	Subduction	1.87967	0.229949	0.0711207	10.5076	8.86517	8.43333		PLU					WR [21632]	49.6	1.9		11.6				10.6	9.2	10.8	0.2		1.4	1.6	0.2
[20557]	INTRAPLATE VOLCANICS	CENTRAL ASIAN FOLDBELT - MESOZOIC / CHINA - MESOZOIC / TIBET	DUOBUZA ORE DISTRICT, GERZE AREA, WESTERN QIANGTANG SUBTERRANE	84.4324	84.4324	32.8386	32.8386	SAE			s_10DB10 [20557]	DIABASE [20557]	156000000 [20557]	156000000 [20557]		JURASSIC [20557]	Subduction	1.75581	0.125138	0.0707129	3.45304	1.08656	9.88462		PLU					WR [20557]	49.8742	3.36975		17.0154				12.22	4.94846	5.5483	0.134832		1.19332	3.68613	0.648682
[21632]	CONTINENTAL FLOOD BASALT	COMEI LARGE IGNEOUS PROVINCE / COMEI LARGE IGNEOUS PROVINCE / DALA DIABASE INTRUSION	SOUTH TIBET	92.22	92.22	28.62	28.62	SAE			s_T0766-9 [21632]	DIABASE [21632]			LOWER [21632]	CRETACEOUS [21632]	Subduction	2.04688	0.236036	0.0700758	7.38739	5.35514	9.10345		PLU					WR [21632]	51.7	2		12.2				10.3	8.6	8.5	0.2		1.1	2	0.3
[21632]	CONTINENTAL FLOOD BASALT	COMEI LARGE IGNEOUS PROVINCE / COMEI LARGE IGNEOUS PROVINCE / DALA DIABASE INTRUSION	SOUTH TIBET	92.22	92.22	28.62	28.62	SAE			s_T0766-19 [21632]	DIABASE [21632]			LOWER [21632]	CRETACEOUS [21632]	Subduction	2.07719	0.234921	0.0686275	9.24603	3.17094	11.6207		PLU					WR [21632]	51.5	3.3		15.5				10.4	7.8	4.7	0.2		0.9	2.8	0.3
[21632]	CONTINENTAL FLOOD BASALT	COMEI LARGE IGNEOUS PROVINCE / COMEI LARGE IGNEOUS PROVINCE / DALA DIABASE INTRUSION	SOUTH TIBET	92.22	92.22	28.62	28.62	SAE			s_T0766-15 [21632]	DIABASE [21632]			LOWER [21632]	CRETACEOUS [21632]	Subduction	2.12577	0.238966	0.0685714	8.93103	3.39456	12.8788		PLU					WR [21632]	50.2	4		13.7				11.8	7.6	4.6	0.2		1.4	2.8	0.3
[21632]	CONTINENTAL FLOOD BASALT	COMEI LARGE IGNEOUS PROVINCE / COMEI LARGE IGNEOUS PROVINCE / DALA DIABASE INTRUSION	SOUTH TIBET	92.22	92.22	28.62	28.62	SAE			s_T0766-10 [21632]	DIABASE [21632]			LOWER [21632]	CRETACEOUS [21632]	Subduction	1.84644	0.218142	0.0683919	13.2743	8.19802	9.96552		PLU					WR [21632]	51.5	2.2		13				10.4	7.6	7.7	0.2		1.6	1.9	0.3
[22741]	CONVERGENT MARGIN	KOHISTAN-LADAKH TERRANE (GANGDISE BELT) / LADAKH ARC / DRAS UNIT / KARGIL GABBRO	PANDRAS, THROUGH DRAS TO KARGIL ALONG THE SRINAGAR-LEH NATIONAL HIGHWAY	76	76	34.5	34.5	SAE			s_KG5 [22741]	GABBRO [22741]				CRETACEOUS [22741]	Subduction	0.333333	0.131148	0.0681818	101.311	1.58929	11.0441		PLU					WR [22741]	46.15	0.88		14.07				10.26	15.71	11.58	0.1		0.06	0.94	0.04
[21632]	CONTINENTAL FLOOD BASALT	COMEI LARGE IGNEOUS PROVINCE / COMEI LARGE IGNEOUS PROVINCE / DALA DIABASE INTRUSION	SOUTH TIBET	92.22	92.22	28.62	28.62	SAE			s_T0766-16 [21632]	DIABASE [21632]			LOWER [21632]	CRETACEOUS [21632]	Subduction	2.08383	0.244211	0.0676259	7.22807	2.86275	13.5588		PLU					WR [21632]	50.4	4.6		14				12.5	6	5	0.2		1.1	3.1	0.3
[21632]	CONTINENTAL FLOOD BASALT	COMEI LARGE IGNEOUS PROVINCE / COMEI LARGE IGNEOUS PROVINCE / DALA DIABASE INTRUSION	SOUTH TIBET	92.22	92.22	28.62	28.62	SAE			s_T0766-12 [21632]	DIABASE [21632]			LOWER [21632]	CRETACEOUS [21632]	Subduction	2.02847	0.223529	0.0670017	9.05882	3.99115	9.8		PLU					WR [21632]	50.4	2.4		14.9				10	8.8	6.2	0.1		1.1	2.4	0.3
[21632]	CONTINENTAL FLOOD BASALT	COMEI LARGE IGNEOUS PROVINCE / COMEI LARGE IGNEOUS PROVINCE / DALA DIABASE INTRUSION	SOUTH TIBET	92.22	92.22	28.62	28.62	SAE			s_T0766-13 [21632]	DIABASE [21632]			LOWER [21632]	CRETACEOUS [21632]	Subduction	2.09868	0.240755	0.0665658	9.58491	3.36154	10.6774		PLU					WR [21632]	52	2.8		15.3				10.1	8.3	4.4	0.1		1.2	2.8	0.3
[21632]	CONTINENTAL FLOOD BASALT	COMEI LARGE IGNEOUS PROVINCE / COMEI LARGE IGNEOUS PROVINCE / DALA DIABASE INTRUSION	SOUTH TIBET	92.22	92.22	28.62	28.62	SAE			s_T0766-18 [21632]	DIABASE [21632]			LOWER [21632]	CRETACEOUS [21632]	Subduction	2.10585	0.227711	0.0660622	11.0241	3.20915	11.9259		PLU					WR [21632]	52.4	3.1		14.6				10.7	7	4.1	0.2		1.6	3.5	0.3
[24190]	CONVERGENT MARGIN	KOHISTAN-LADAKH TERRANE (GANGDISE BELT) / KOHISTAN ARC / CHILAS COMPLEX		74.1	74.1	35.41	35.41	SAE			s_S25-D [24190]	GABBRO [24190]				CRETACEOUS [24190]	Subduction	0.690722	0.103796	0.0646186	20.4493	2.80186		EQUIGRANULAR [24190]	PLU					WR [24190]	49.17	1.551		18.34				9.47	9.94	4.58	0.154		0.82	3.29	0.297
[22145]	INTRAPLATE VOLCANICS	ANATOLIA-IRAN BELT - MESOZOIC / TURKEY / PONTIDES / HAYRAT GABBRO	VALLEY OF THE WEST BRANCH OF OF BALTACI STREAM, 4 KM NORTHWEST OF HAYRAT TOWN OF TRABZON CITY	40	40	41	41	SAE			s_HY-14 [22145]	GABBRO [22145]			UPPER [22145]	CRETACEOUS [22145]	Subduction	2.77457	0.154839	0.0625	10.3226	0.908257	15.375		PLU					WR [22145]	43.44	2.35		16.65	0.003			11.01	11.86	5.48	0.15		1.33	3.61	0.38
[21632]	CONTINENTAL FLOOD BASALT	COMEI LARGE IGNEOUS PROVINCE / COMEI LARGE IGNEOUS PROVINCE / DALA DIABASE INTRUSION	SOUTH TIBET	92.22	92.22	28.62	28.62	SAE			s_T0766-17 [21632]	DIABASE [21632]			LOWER [21632]	CRETACEOUS [21632]	Subduction	2.17904	0.253299	0.0616071	6.19289	1.74091	13.1111		PLU					WR [21632]	55	2.9		13.1				12.1	6.5	3	0.2		1.3	2.8	0.5
[22741]	CONVERGENT MARGIN	KOHISTAN-LADAKH TERRANE (GANGDISE BELT) / LADAKH ARC / DRAS UNIT / KARGIL GABBRO	PANDRAS, THROUGH DRAS TO KARGIL ALONG THE SRINAGAR-LEH NATIONAL HIGHWAY	76	76	34.5	34.5	SAE			s_KG7 [22741]	GABBRO [22741]				CRETACEOUS [22741]	Subduction	0.696629	0.124248	0.0614525	23.8477	5.72973	8.21577		PLU					WR [22741]	50.08	1.21		14.47				12.57	12.06	6.73	0.14		0.37	2.05	0.05
[21684]	CONVERGENT MARGIN	KOHISTAN-LADAKH TERRANE (GANGDISE BELT) / KOHISTAN ARC / CHILAS COMPLEX		74.1283	74.1283	35.3225	35.3225	SAE			s_C 66 [21684]	GABBRONORITE, OLIVINE [21684]				MESOZOIC [21684]	Subduction			0.06	26.3158				PLU					WR [21684]	42.51	0.019		20.47				7.64	11.54	16.5	0.107		0	0.68	0.01
[13759]	INTRAPLATE VOLCANICS	CARPATHIAN BELT AND PANNONIAN BASIN / SOUTHERN PANNONIAN-EASTERN CARPATHIAN (TISZA-DACIA / SREDNOGORIE ARC	VARSHILO, STRANDZHA MOUNTAINS	27.3142	27.3142	42.2571	42.2571	SAE			s_AVQ 142 [13759]	GABBRO [13759]			UPPER [13759]	CRETACEOUS [13759]	Subduction	0.209743	0.146748		44.8432	8.77419	11.8405		PLU					WR [13759]	43.5927	0.848058		20.1382				11.5741	16.4422	5.80983	0.164549		0.31644	1.07589	0.0379728
[21787]	CONVERGENT MARGIN	KOHISTAN-LADAKH TERRANE (GANGDISE BELT) / KOHISTAN ARC / CHILAS COMPLEX	EAST OF CHILAS	73	73	35	35	SAE			s_92CH-18 [21787]	GABBRONORITE [21787]				CRETACEOUS [21787]	Subduction				27.5248	2.33333			PLU					WR [21787]	52.54	0.35		18.57				7.23	9.57	7.74	0.13		0.27	2.77	0.03
[21787]	CONVERGENT MARGIN	KOHISTAN-LADAKH TERRANE (GANGDISE BELT) / KOHISTAN ARC / CHILAS COMPLEX	KHANBARI RIVER	73	73	35	35	SAE			s_92CH-87 [21787]	GABBRONORITE [21787]				CRETACEOUS [21787]	Subduction	0.325581	0.0714286		15.9592	4.27353			PLU					WR [21787]	55.05	0.88		17.31				7.94	8.51	4.86	0.14		1.06	3.23	0.14
[21787]	CONVERGENT MARGIN	KOHISTAN-LADAKH TERRANE (GANGDISE BELT) / KOHISTAN ARC / CHILAS COMPLEX	THAK RIVER	73	73	35	35	SAE			s_92CH-20 [21787]	GABBRONORITE [21787]				CRETACEOUS [21787]	Subduction				36.3415	5			PLU					WR [21787]	51.6	0.4		20.34				6.83	10.61	5.91	0.12		0.18	3.04	0.01
[21787]	CONVERGENT MARGIN	KOHISTAN-LADAKH TERRANE (GANGDISE BELT) / KOHISTAN ARC / CHILAS COMPLEX	THOR RIVER	73	73	35	35	SAE			s_92CH-63 [21787]	GABBRONORITE [21787]				CRETACEOUS [21787]	Subduction	0.126582	0.0460829		22.6037	2			PLU					WR [21787]	51.37	0.82		18.82				8.71	9.9	5.46	0.16		0.36	3.25	0.1
[21787]	CONVERGENT MARGIN	KOHISTAN-LADAKH TERRANE (GANGDISE BELT) / KOHISTAN ARC / CHILAS COMPLEX	WEST OF CHILAS	73	73	35	35	SAE			s_92CH-43 [21787]	GABBRONORITE [21787]				CRETACEOUS [21787]	Subduction	0.168067	0.0597015		26.7761	5.94286			PLU					WR [21787]	52.74	0.4		19				6.62	9.34	6.26	0.12		0.43	2.71	0.05
[13235]	CONVERGENT MARGIN	KOHISTAN-LADAKH TERRANE (GANGDISE BELT) / KOHISTAN ARC / JIJAL COMPLEX / KAMILA UNIT		73.2237	73.2237	35.2877	35.2877	SAE			s_UM01-127 [13235]	GABBRO [13235]				CRETACEOUS [13235]	Subduction	0.0218069	0.0151188		7.36501	0.143911	9.15385		PLU					WR [13235]	44.73	1.12		21.66				9.61	11.06	3.3	0.19		0.09	3.55	0.58
[13235]	CONVERGENT MARGIN	KOHISTAN-LADAKH TERRANE (GANGDISE BELT) / KOHISTAN ARC / JIJAL COMPLEX / KAMILA UNIT		73.2238	73.2238	35.2894	35.2894	SAE			s_UM01-128 [13235]	GABBRO [13235]				CRETACEOUS [13235]	Subduction	0.0275591	0.00981767		7.0547	0.276029	8.6875		PLU					WR [13235]	51.78	1.05		19.65				8.08	8.42	4.13	0.18		0.24	4.15	0.17
[13235]	CONVERGENT MARGIN	KOHISTAN-LADAKH TERRANE (GANGDISE BELT) / KOHISTAN ARC / JIJAL COMPLEX / KIRU UNIT		73.1266	73.1266	35.2017	35.2017	SAE			s_KG-40 [13235]	GABBRO [13235]				CRETACEOUS [13235]	Subduction	0.00847458	0.0208333		20.2292	3.20833	9.88095		PLU					WR [13235]	46.96	1.4		15.79				11.65	12.14	7.26	0.2		0.03	2.25	0.02
[13235]	CONVERGENT MARGIN	KOHISTAN-LADAKH TERRANE (GANGDISE BELT) / KOHISTAN ARC / JIJAL COMPLEX / KIRU UNIT		73.1213	73.1213	35.1933	35.1933	SAE			s_KG-38 [13235]	GABBRO [13235]				CRETACEOUS [13235]	Subduction	0.0188679	0.0357143		17.1429	15	3.65116		PLU					WR [13235]	48.12	0.22		18.32				3.72	16.93	8.59	0.08		0.02	0.88	0.01
[13235]	CONVERGENT MARGIN	KOHISTAN-LADAKH TERRANE (GANGDISE BELT) / KOHISTAN ARC / JIJAL COMPLEX / KIRU UNIT		73.1313	73.1313	35.206	35.206	SAE			s_KG-41 [13235]	GABBRO [13235]				CRETACEOUS [13235]	Subduction	0.0111111	0.025641		29.7436	18.5	5.26087		PLU					WR [13235]	48.35	0.56		16.72				6.94	14.34	8.5	0.13		0.06	1.57	0.01
[13235]	CONVERGENT MARGIN	KOHISTAN-LADAKH TERRANE (GANGDISE BELT) / KOHISTAN ARC / JIJAL COMPLEX / KIRU UNIT		73.1092	73.1092	35.1809	35.1809	SAE			s_UM01-122 [13235]	GABBRO [13235]				CRETACEOUS [13235]	Subduction	0.0167364	0.0166667		6.875	1.11842	4.43243		PLU					WR [13235]	49.81	0.7		15.82				7.79	12.42	8.52	0.16		0.11	1.83	0.09
[13235]	CONVERGENT MARGIN	KOHISTAN-LADAKH TERRANE (GANGDISE BELT) / KOHISTAN ARC / JIJAL COMPLEX / PATAN UNIT		73.047	73.047	35.1289	35.1289	SAE			s_KG-15 [13235]	GABBRO [13235]				CRETACEOUS [13235]	Subduction		0.00729927		15.6934	0.496063	5.72603		PLU					WR [13235]	44.05	1.31		10.56				14.65	10.24	12.3	0.24		0.15	1.23	0.09
[13235]	CONVERGENT MARGIN	KOHISTAN-LADAKH TERRANE (GANGDISE BELT) / KOHISTAN ARC / JIJAL COMPLEX / PATAN UNIT		73.047	73.047	35.1287	35.1287	SAE			s_KG-14 [13235]	GABBRO [13235]				CRETACEOUS [13235]	Subduction	0.0769231	0.0423077		11.5385	0.430303	7.41463		PLU					WR [13235]	45.33	1.63		18.83				11.04	10.48	5.22	0.15		0.18	2.88	0.41
[13235]	CONVERGENT MARGIN	KOHISTAN-LADAKH TERRANE (GANGDISE BELT) / KOHISTAN ARC / JIJAL COMPLEX / PATAN UNIT		73.0469	73.0469	35.1286	35.1286	SAE			s_KG-13b [13235]	GABBRO [13235]				CRETACEOUS [13235]	Subduction	0.0379747	0.025		20.9583	0.714286	7.63415		PLU					WR [13235]	46.76	1.03		18.45				9.29	10.34	6.41	0.13		0.15	2.96	0.15
[13235]	CONVERGENT MARGIN	KOHISTAN-LADAKH TERRANE (GANGDISE BELT) / KOHISTAN ARC / JIJAL COMPLEX / PATAN UNIT		73.0469	73.0469	35.1286	35.1286	SAE			s_KG-13a [13235]	GABBRO [13235]				CRETACEOUS [13235]	Subduction	0.0944882	0.0373832		27.8505	1.01163	10.087		PLU					WR [13235]	48.6	1.13		22.16				6.37	10.25	3.06	0.08		0.15	4.02	0.26
[13235]	CONVERGENT MARGIN	KOHISTAN-LADAKH TERRANE (GANGDISE BELT) / KOHISTAN ARC / PATAN-BASU COMPLEX / KAMILA UNIT		73.2044	73.2044	35.3734	35.3734	SAE			s_UM01-135 [13235]	GABBRO [13235]				CRETACEOUS [13235]	Subduction	0.0333333	0.00986842		16.6118	0.588785	7.62963		PLU					WR [13235]	51.16	0.82		16.16				8.4	9.18	6.99	0.18		0.36	2.86	0.11
[13235]	CONVERGENT MARGIN	KOHISTAN-LADAKH TERRANE (GANGDISE BELT) / KOHISTAN ARC / PATAN-BASU COMPLEX / KAMILA UNIT		73.1793	73.1793	35.244	35.244	SAE			s_KG-51 [13235]	GABBRO [13235]				CRETACEOUS [13235]	Subduction	1.55224	0.311377		28.5928	9.55157	7.27273		PLU					WR [13235]	51.55	0.59		18.81				6.92	9.63	5.35	0.15		0.77	2.54	0.11
[13235]	CONVERGENT MARGIN	KOHISTAN-LADAKH TERRANE (GANGDISE BELT) / KOHISTAN ARC / PATAN-BASU COMPLEX / KIRU UNIT		73.1096	73.1096	35.1843	35.1843	SAE			s_KG-35 [13235]	GABBRO [13235]				CRETACEOUS [13235]	Subduction	0.38674	0.0888325		9.31472	3.03793	6.13636		PLU					WR [13235]	52.4	0.4		17.97				7.02	10.19	6.92	0.15		0.43	2.87	0.1
[13235]	CONVERGENT MARGIN	KOHISTAN-LADAKH TERRANE (GANGDISE BELT) / KOHISTAN ARC / PATAN-DASU COMPLEX / PATAN UNIT		73.0571	73.0571	35.1372	35.1372	SAE			s_KG-19B [13235]	GABBRO [13235]				CRETACEOUS [13235]	Subduction	0.10917	0.0304136		9.87835	0.376623	11.5161		PLU					WR [13235]	45.76	1		19.33				11.42	10.97	5.64	0.23		0.33	2.5	0.21
[13235]	CONVERGENT MARGIN	KOHISTAN-LADAKH TERRANE (GANGDISE BELT) / KOHISTAN ARC / PATAN-DASU COMPLEX / PATAN UNIT		73.0571	73.0571	35.1372	35.1372	SAE			s_KG-19A [13235]	GABBRO [13235]				CRETACEOUS [13235]	Subduction	0.0552995	0.0163488		8.58311	0.130682	9.7027		PLU					WR [13235]	48.36	1.09		18.51				11.01	10.1	5.34	0.24		0.2	2.6	0.2
[13235]	CONVERGENT MARGIN	KOHISTAN-LADAKH TERRANE (GANGDISE BELT) / KOHISTAN ARC / PATAN-DASU COMPLEX / PATAN UNIT		73.0585	73.0585	35.1353	35.1353	SAE			s_KG-18 [13235]	GABBRO [13235]				CRETACEOUS [13235]	Subduction	0.0185759	0.00639659		9.26439	0.285088	7.66667		PLU					WR [13235]	50.78	1.04		18.12				10.31	9.8	4.93	0.21		0.29	2.59	0.19
[13235]	CONVERGENT MARGIN	KOHISTAN-LADAKH TERRANE (GANGDISE BELT) / KOHISTAN ARC / PATAN-DASU COMPLEX / PATAN UNIT		73.0586	73.0586	35.1353	35.1353	SAE			s_KG-17 [13235]	GABBRO [13235]				CRETACEOUS [13235]	Subduction	0.0333333	0.00971922		9.55724	0.345178	9.24242		PLU					WR [13235]	53.08	0.92		17.44				9.21	9.15	4.37	0.19		0.28	2.54	0.17
[13235]	CONVERGENT MARGIN	KOHISTAN-LADAKH TERRANE (GANGDISE BELT) / KOHISTAN ARC / PATAN-DASU COMPLEX / PATAN UNIT		73.0586	73.0586	35.1447	35.1447	SAE			s_KG-23 [13235]	GABBRO [13235]				CRETACEOUS [13235]	Subduction	0.0182768	0.00935829		6.06952	0.452736	6.70968		PLU					WR [13235]	53.41	1.11		18.35				8.96	8.2	3.75	0.27		0.16	2.9	0.31
[21046]	INTRAPLATE VOLCANICS	CENTRAL ASIAN FOLDBELT - MESOZOIC / CHINA - MESOZOIC / TIBET	CROSS SECTION S13 IN WETSREN ZHONGBA COUNTY	83.6733	83.6733	29.6808	29.6808	SAE			s_S13-02H5 [21046]	DIABASE [21046]	130000000 [21046]	130000000 [21046]	LOWER [21046]	CRETACEOUS [21046]	Subduction	2.5	0.2		8.4	0.85	14.8182		PLU					WR [21046]	50.11	2.87		14.25				10.87	6.38	5.36	0.16		0.57	4.85	0.37
[21046]	INTRAPLATE VOLCANICS	CENTRAL ASIAN FOLDBELT - MESOZOIC / CHINA - MESOZOIC / TIBET	CROSS SECTION S13 IN WETSREN ZHONGBA COUNTY	83.6733	83.6733	29.6808	29.6808	SAE			s_S13-02H7 [21046]	DIABASE [21046]	130000000 [21046]	130000000 [21046]	LOWER [21046]	CRETACEOUS [21046]	Subduction	1.66667	0.185185		6.51852	0.578947	14.1667		PLU					WR [21046]	50.03	2.88		14.4				10.84	5.67	5.25	0.17		0.43	5.28	0.34
[21046]	INTRAPLATE VOLCANICS	CENTRAL ASIAN FOLDBELT - MESOZOIC / CHINA - MESOZOIC / TIBET	CROSS SECTION S13 IN WETSREN ZHONGBA COUNTY	83.6733	83.6733	29.6808	29.6808	SAE			s_S13-02H8 [21046]	DIABASE [21046]	130000000 [21046]	130000000 [21046]	LOWER [21046]	CRETACEOUS [21046]	Subduction	1.66667	0.227273		7.86364	0.736842	15.8696		PLU					WR [21046]	51.51	2.84		13.86				9.71	6.76	5.41	0.23		0.42	5.32	0.35
[21046]	INTRAPLATE VOLCANICS	CENTRAL ASIAN FOLDBELT - MESOZOIC / CHINA - MESOZOIC / TIBET	CROSS SECTION S13 IN WETSREN ZHONGBA COUNTY	83.6733	83.6733	29.6808	29.6808	SAE			s_S13-04H1 [21046]	DIABASE [21046]	130000000 [21046]	130000000 [21046]	LOWER [21046]	CRETACEOUS [21046]	Subduction	1.66667	0.178571		24.75	3.05	15.7391		PLU					WR [21046]	50.09	2.93		14				10.91	6.9	5.33	0.14		2.05	3.23	0.37
[21046]	INTRAPLATE VOLCANICS	CENTRAL ASIAN FOLDBELT - MESOZOIC / CHINA - MESOZOIC / TIBET	CROSS SECTION S13 IN WETSREN ZHONGBA COUNTY	83.6733	83.6733	29.6808	29.6808	SAE			s_S13-04H3 [21046]	DIABASE [21046]	130000000 [21046]	130000000 [21046]	LOWER [21046]	CRETACEOUS [21046]	Subduction	1.66667	0.178571		20.6071	2.6	15		PLU					WR [21046]	50.07	2.94		13.95				10.77	6.81	5.51	0.15		1.82	3.79	0.36
[21046]	INTRAPLATE VOLCANICS	CENTRAL ASIAN FOLDBELT - MESOZOIC / CHINA - MESOZOIC / TIBET	CROSS SECTION S13 IN WETSREN ZHONGBA COUNTY	83.6733	83.6733	29.6808	29.6808	SAE			s_S13-04H4 [21046]	DIABASE [21046]	130000000 [21046]	130000000 [21046]	LOWER [21046]	CRETACEOUS [21046]	Subduction	1.66667	0.172414		18.6552	3	15.4783		PLU					WR [21046]	50.35	2.96		13.94				10.85	6.83	5.41	0.18		1.83	3.28	0.37
[21046]	INTRAPLATE VOLCANICS	CENTRAL ASIAN FOLDBELT - MESOZOIC / CHINA - MESOZOIC / TIBET	CROSS SECTION S13 IN WETSREN ZHONGBA COUNTY	83.6733	83.6733	29.6808	29.6808	SAE			s_S13-05H7 [21046]	DIABASE [21046]	130000000 [21046]	130000000 [21046]	LOWER [21046]	CRETACEOUS [21046]	Subduction	1.66667	0.185185		6.74074	1.89474	15.9091		PLU					WR [21046]	49.6	2.89		13.9				10.61	7.95	5.53	0.17		1.04	3.86	0.36
[21046]	INTRAPLATE VOLCANICS	CENTRAL ASIAN FOLDBELT - MESOZOIC / CHINA - MESOZOIC / TIBET	CROSS SECTION S13 IN WETSREN ZHONGBA COUNTY	83.6733	83.6733	29.6808	29.6808	SAE			s_S13-05H9 [21046]	DIABASE [21046]	130000000 [21046]	130000000 [21046]	LOWER [21046]	CRETACEOUS [21046]	Subduction	2.5	0.192308		13.9615	2.28571	16.1364		PLU					WR [21046]	49.87	2.93		13.96				10.82	7.33	5.5	0.16		1.62	3.48	0.36
[21046]	INTRAPLATE VOLCANICS	CENTRAL ASIAN FOLDBELT - MESOZOIC / CHINA - MESOZOIC / TIBET	CROSS SECTION S13 IN WETSREN ZHONGBA COUNTY	83.6733	83.6733	29.6808	29.6808	SAE			s_S13-05H11 [21046]	DIABASE [21046]	130000000 [21046]	130000000 [21046]	LOWER [21046]	CRETACEOUS [21046]	Subduction	1.66667	0.208333		6.25	2.15	15.3478		PLU					WR [21046]	49.86	2.96		14.05				10.1	7.86	5.83	0.16		0.99	4.06	0.35
[21046]	INTRAPLATE VOLCANICS	CENTRAL ASIAN FOLDBELT - MESOZOIC / CHINA - MESOZOIC / TIBET	CROSS SECTION S13 IN WETSREN ZHONGBA COUNTY	83.6733	83.6733	29.6808	29.6808	SAE			s_S13-05H13 [21046]	DIABASE [21046]	130000000 [21046]	130000000 [21046]	LOWER [21046]	CRETACEOUS [21046]	Subduction	2.5	0.217391		15.7391	2.27778	13.7083		PLU					WR [21046]	49.59	2.74		14.31				9.97	8.86	6.09	0.16		1.42	2.73	0.31
[21046]	INTRAPLATE VOLCANICS	CENTRAL ASIAN FOLDBELT - MESOZOIC / CHINA - MESOZOIC / TIBET	CROSS SECTION S13 IN WETSREN ZHONGBA COUNTY	83.6733	83.6733	29.6808	29.6808	SAE			s_S13-05H14 [21046]	DIABASE [21046]	130000000 [21046]	130000000 [21046]	LOWER [21046]	CRETACEOUS [21046]	Subduction	2.5	0.227273		16.5909	2.16667	14.4783		PLU					WR [21046]	49.91	2.76		14.03				10.09	8.16	5.81	0.17		1.39	3.38	0.33
[21046]	INTRAPLATE VOLCANICS	CENTRAL ASIAN FOLDBELT - MESOZOIC / CHINA - MESOZOIC / TIBET	CROSS SECTION S13 IN WETSREN ZHONGBA COUNTY	83.6733	83.6733	29.6808	29.6808	SAE			s_S13-06H15 [21046]	DIABASE [21046]	130000000 [21046]	130000000 [21046]	LOWER [21046]	CRETACEOUS [21046]	Subduction	1.66667	0.192308		9.03846	2.21053	15.7826		PLU					WR [21046]	49.9	3		13.99				10.56	7.18	5.58	0.15		1.08	4.19	0.36
[9443]	INTRAPLATE VOLCANICS	ANATOLIA-IRAN BELT - CENOZOIC/QUATERNARY / ANATOLIA / EASTERN ANATOLIAN VOLCANIC BELT / BERIT VOLCANOSEDIMENTARY UNIT	BERIT AREA	36.9	36.9	38	38	SUBAERIAL			s T/02/73 [9443]	BASALT [9443]				CRETACEOUS [9443]	Subduction				55.6667	4.6	7.07143		VOLCANIC ROCK					WHOLE_ROCK [9443]	48.35	2.06		15.46				12.14	5.6	7.14	0.22		2.41	4.06	0.23
[9443]	INTRAPLATE VOLCANICS	ANATOLIA-IRAN BELT - CENOZOIC/QUATERNARY / ANATOLIA / EASTERN ANATOLIAN VOLCANIC BELT / BERIT VOLCANOSEDIMENTARY UNIT	BERIT AREA	36.9	36.9	38	38	SUBAERIAL			s T/02/72 [9443]	BASALT [9443]				CRETACEOUS [9443]	Subduction				152.7	4.45833	8.73913		VOLCANIC ROCK					WHOLE_ROCK [9443]	47.46	2.68		14.04				14.14	7.13	3.57	0.68		4.76	2.52	0.33
[13043]	INTRAPLATE VOLCANICS	ANATOLIA-IRAN BELT - CENOZOIC/QUATERNARY / IRAN / ZAGROS THRUST	KAMYARAN	46.95	46.95	34.82	34.82	SUBAERIAL			s AV-AR(17) [13043]	ANDESITE, BASALTIC [13043]	34000000 [13043]	34000000 [13043]		EOCENE [13043]	Subduction						4.96433		VOLCANIC ROCK					WHOLE_ROCK [13043]	53.71	1.27		18.47		3.51	4.42		6.83	6.16	0.21		0.72	2.26	0.18
[13043]	INTRAPLATE VOLCANICS	ANATOLIA-IRAN BELT - CENOZOIC/QUATERNARY / IRAN / ZAGROS THRUST	KAMYARAN	46.95	46.95	34.82	34.82	SUBAERIAL			s AZ1 [13043]	BASALT [13043]	34000000 [13043]	34000000 [13043]		EOCENE [13043]	Subduction					1.51176			VOLCANIC ROCK					WHOLE_ROCK [13043]	50.5	1.26		15.04		2.76	5.17		10.78	7.24	0.15		0.72	3.42	0.2
[13043]	INTRAPLATE VOLCANICS	ANATOLIA-IRAN BELT - CENOZOIC/QUATERNARY / IRAN / ZAGROS THRUST	KAMYARAN	46.95	46.95	34.82	34.82	SUBAERIAL			s AZ2 [13043]	BASALT [13043]	34000000 [13043]	34000000 [13043]		EOCENE [13043]	Subduction	2.4	0.199336		10.7807	3.25217	5.76596		VOLCANIC ROCK					WHOLE_ROCK [13043]	49.87	1.81		14.16		2.31	8.6		7.7	7.06	0.13		1.28	3.13	0
[13043]	INTRAPLATE VOLCANICS	ANATOLIA-IRAN BELT - CENOZOIC/QUATERNARY / IRAN / ZAGROS THRUST	KAMYARAN	46.95	46.95	34.82	34.82	SUBAERIAL			s AZ6 [13043]	BASALT [13043]	34000000 [13043]	34000000 [13043]		EOCENE [13043]	Subduction	2.1							VOLCANIC ROCK					WHOLE_ROCK [13043]	48.7	0.44		19.14		1.94	2.49		14.57	8.38	0.15		0.17	2.69	0
[13043]	INTRAPLATE VOLCANICS	ANATOLIA-IRAN BELT - CENOZOIC/QUATERNARY / IRAN / ZAGROS THRUST	KAMYARAN	46.95	46.95	34.82	34.82	SUBAERIAL			s AZ6 [13043]	BASALT [13043]	34000000 [13043]	34000000 [13043]		EOCENE [13043]	Subduction	2.3				1.01818			VOLCANIC ROCK					WHOLE_ROCK [13043]	47.24	0.63		18		2.13	4.35		13.73	8.62	0.17		0.29	2.77	0.19
[truncated: 125 more columns]
