# Supplementary material for: Types of Subducted Material Controlling Tethyan Porphyry Copper Mineralization
Source: Research Square preprint supplement (doi:10.21203/rs.3.rs-6037618/v1), 2025-02-26
Supplement: Supplementary file 3 [file 4f77f6bc4dda40f7cf66979f.xlsx]

## Sheet: Sheet1
Supplementary Table 4 Details of the end-members for Monte Carlo simulation
End-members	Location	87Sr/86Sr(i)	Sr concentration (ppm)	143Nd/ 144Nd	Nd concentration (ppm)	Data source
Depleted Mantle	Average	0.70263	7.66	0.51313	0.581	Workman and Hart, 2005, Earth and Planetary Science Letters, 231 (1): 53-72
Terrigenous sediments	Tethys-Himalaya	0.753141	46.4	0.511672	32.7	Richards et al., 2005, Earth and Planetary Science Letters, 236(3): 773-796
		0.733451	297	0.511769	25.7	Richards et al., 2005, Earth and Planetary Science Letters, 236(3): 773-796
		0.761221	99.7	0.511919	34	Richards et al., 2005, Earth and Planetary Science Letters, 236(3): 773-796
		0.735692	229	0.512238	13	Richards et al., 2005, Earth and Planetary Science Letters, 236(3): 773-796
		0.758542	93	0.511903	33.7	Richards et al., 2005, Earth and Planetary Science Letters, 236(3): 773-796
		0.775981	38	0.511766	43.96	Richards et al., 2005, Earth and Planetary Science Letters, 236(3): 773-796
		0.773708	61	0.511796	25.7	Richards et al., 2005, Earth and Planetary Science Letters, 236(3): 773-796
		0.752422	87	0.512023	33.3	Richards et al., 2005, Earth and Planetary Science Letters, 236(3): 773-796
		0.774694	67	0.511946	25	Richards et al., 2005, Earth and Planetary Science Letters, 236(3): 773-796
		0.774423	53	0.511841	25.7	Richards et al., 2005, Earth and Planetary Science Letters, 236(3): 773-796
		0.765592	63	0.511941	32.3	Richards et al., 2005, Earth and Planetary Science Letters, 236(3): 773-796
		0.754544	85	0.511919	46.8	Richards et al., 2005, Earth and Planetary Science Letters, 236(3): 773-796
	High-Himalaya	0.740053	135	0.511737	29.9	Richards et al., 2005, Earth and Planetary Science Letters, 236(3): 773-796
		0.768227	76.3	0.512224	47.6	Richards et al., 2005, Earth and Planetary Science Letters, 236(3): 773-796
		0.747841	120	0.511829	31.2	Richards et al., 2005, Earth and Planetary Science Letters, 236(3): 773-796
		0.738382	86	0.511963	32.4	Richards et al., 2005, Earth and Planetary Science Letters, 236(3): 773-796
		0.740685	122	0.511977	29.7	Richards et al., 2005, Earth and Planetary Science Letters, 236(3): 773-796
		0.760685	51.3	0.511791	40.5	Richards et al., 2005, Earth and Planetary Science Letters, 236(3): 773-796
		0.747635	121	0.51183	23.3	Richards et al., 2005, Earth and Planetary Science Letters, 236(3): 773-796
		0.729667	72.7	0.511809	22.2	Richards et al., 2005, Earth and Planetary Science Letters, 236(3): 773-796
	Northwest Pakistan	0.704632	9450	0.512403	119.6	Tilton et al., 1998, Journal of Petrology, 39(11-12): 1865-1874
		0.704668	8250	0.51244	231.9	Tilton et al., 1998, Journal of Petrology, 39(11-12): 1865-1874
		0.704859	6850	0.512416	176.5	Tilton et al., 1998, Journal of Petrology, 39(11-12): 1865-1874
		0.704752	11700	0.512455	227	Tilton et al., 1998, Journal of Petrology, 39(11-12): 1865-1874
	Italy	0.707453	645	0.511798	9	Conticelli et al., 2009, Lithos, 107(1): 68–92
		0.710436	694	0.512027	2	Conticelli et al., 2009, Lithos, 107(1): 68–92
		0.708785	386	0.512123	4	Conticelli et al., 2009, Lithos, 107(1): 68–92
		0.709307	574	0.512081	13	Conticelli et al., 2009, Lithos, 107(1): 68–92
	Balkan	0.71884	83	0.512162	25.3	Prelevic´ et al., 2008, Geochimica et Cosmochimica Acta, 72(8): 2125-2156
		0.71818	79	0.512135	19	Prelevic´ et al., 2008, Geochimica et Cosmochimica Acta, 72(8): 2125-2156
		0.7112	349	0.512107	25.9	Prelevic´ et al., 2008, Geochimica et Cosmochimica Acta, 72(8): 2125-2156
		0.71139	810	0.512129	25.8	Prelevic´ et al., 2008, Geochimica et Cosmochimica Acta, 72(8): 2125-2156
Pelagic sediments	Southern Tibet	0.706558	122.697	0.512278	8.05577	Chen et al., 2022, Lithos, 414-415: 106619
		0.704527	216.54	0.512643	20.3648	Chen et al., 2022, Lithos, 414-415: 106619
		0.705899	468.765	0.512566	18.7666	Chen et al., 2022, Lithos, 414-415: 106619
		0.705907	346.137	0.512578	21.3223	Chen et al., 2022, Lithos, 414-415: 106619
		0.705914	349.4	0.512542	18.1755	Chen et al., 2022, Lithos, 414-415: 106619
		0.70734	257.464	0.512262	22.0476	Chen et al., 2022, Lithos, 414-415: 106619
	Indian Ocean	0.71682	119	0.512163	23.05	Ben Othman et al., 1989, Earth and Planetary Science Letters, 94(1): 1-21
	Makran	0.71109	422	0.51203	34	Plank, 2014, Treatise on Geochemistry 2nd Edition, Elsevier, 607-629
	Andaman	0.73631	116	0.51195	33.3	Plank, 2014, Treatise on Geochemistry 2nd Edition, Elsevier, 607-629
	Sumatra	0.72969	138	0.512	33.4	Plank, 2014, Treatise on Geochemistry 2nd Edition, Elsevier, 607-629
	Italy	0.7407	42.7	0.51193	32.72	Mazzeo et al., 2014, Chemical Geology, 386: 165-183
	Italy	0.74001	41.9	0.51189	36.7	Mazzeo et al., 2014, Chemical Geology, 386: 165-183
	Italy	0.71575	49.32	0.51198	34.17	Mazzeo et al., 2014, Chemical Geology, 386: 165-183
	Italy	0.72509	66	0.51201	21.31	Mazzeo et al., 2014, Chemical Geology, 386: 165-183
	Alps	0.70453	185.65	0.512232	33.69	Mahlen et al., 2015, Geological Society of America Bulletin, 117(3/4): 530-544
		0.74559	80.2	0.511879	34.37	Mahlen et al., 2015, Geological Society of America Bulletin, 117(3/4): 530-544
		0.70526	123.25	0.512203	28.98	Mahlen et al., 2015, Geological Society of America Bulletin, 117(3/4): 530-544
		0.70615	136.17	0.512043	41.09	Mahlen et al., 2015, Geological Society of America Bulletin, 117(3/4): 530-544
		0.7081	196.36	0.512029	29.34	Mahlen et al., 2015, Geological Society of America Bulletin, 117(3/4): 530-544
		0.7062	129.41	0.512113	26.78	Mahlen et al., 2015, Geological Society of America Bulletin, 117(3/4): 530-544
		0.725	77.64	0.511875	40.71	Mahlen et al., 2015, Geological Society of America Bulletin, 117(3/4): 530-544
		0.70427	131.82	0.512141	33.87	Mahlen et al., 2015, Geological Society of America Bulletin, 117(3/4): 530-544
		0.70626	111.97	0.511996	39.56	Mahlen et al., 2015, Geological Society of America Bulletin, 117(3/4): 530-544
		0.70647	59.99	0.512208	17.05	Mahlen et al., 2015, Geological Society of America Bulletin, 117(3/4): 530-544
		0.72803	15.8	0.512199	14.44	Mahlen et al., 2015, Geological Society of America Bulletin, 117(3/4): 530-544
		0.70913	218.83	0.512227	19	Mahlen et al., 2015, Geological Society of America Bulletin, 117(3/4): 530-544
		0.70869	605.92	0.512118	19.02	Mahlen et al., 2015, Geological Society of America Bulletin, 117(3/4): 530-544
		0.71026	216.1	0.512206	18.1	Mahlen et al., 2015, Geological Society of America Bulletin, 117(3/4): 530-544
		0.7087	603.39	0.51212	17.68	Mahlen et al., 2015, Geological Society of America Bulletin, 117(3/4): 530-544
		0.7041	50.93	0.512178	20.12	Mahlen et al., 2015, Geological Society of America Bulletin, 117(3/4): 530-544
		0.70674	177	0.512238	18.74	Mahlen et al., 2015, Geological Society of America Bulletin, 117(3/4): 530-544
