# Supplementary material for: Types of Subducted Material Controlling Tethyan Porphyry Copper Mineralization
Source: Research Square preprint supplement (doi:10.21203/rs.3.rs-6037618/v1), 2025-02-26
Supplement: Supplementary file 4 [file b39bf5add3c0f79fc271011d.xlsx]

## Sheet: Complete Database
Supplementary Table 2 Zircon age and trace element data from the Tethys
Continent	Country/Territory	Location	Reference	Sample	Spot	Latitude (°)	Longitude (°)	206Pb/238U Age	1σ	207Pb/235U Age	1σ	207Pb/206Pb Age	1σ	Best Age	Mg	Mn	Al	P	Ti	Sc	Fe	Sr	Y	Nb	Ba	La	Ce	Pr	Nd	Sm	Eu	Gd	Tb	Dy	Ho	Er	Tm	Yb	Lu	Hf	Ta	Pb	Th	U	Th/U	U(initial)	△FMQ	Molar P	Molar (REE+Y)
Europe	Romania	Danube River	Balica et al., 2020, Earth and Planetary Science Letters, 531, p.116005.	Danube	Danube.Spot 103	44.9229	29.627	11.5627	0.254494					11.5627			15.6619	69.9926	5.82639	1.25826			111.317	2.09253		0.00123989	2.05834	0.0706763	0.811151	1.56522	0.455126	5.5824	1.60741	10.9037	3.14661	10.3341	1.75619	32.5024	3.46317	9927.59	0.402929		53.0784	183.042	0.28998	183.042	-2.51543	2.26001	1.69789
Europe	Romania	Danube River	Balica et al., 2020, Earth and Planetary Science Letters, 531, p.116005.	Danube	Danube.Spot 237	44.9229	29.627	13.6913	0.3054			558.88	135.862	13.6913			108.296	277.108	5.87774	1.42148			764.558	9.1533		2.95309	16.7697	1.1838	3.5528	1.91348	0.525423	8.25472	3.78327	48.4236	21.3802	112.512	26.9886	243.097	76.0023	10090.7	1.80074		164.207	362.339	0.453187	362.339	0.526329	8.94764	11.9653
Europe	Romania	Danube River	Balica et al., 2020, Earth and Planetary Science Letters, 531, p.116005.	Danube	Danube.Spot 51	44.9229	29.627	22.4542	0.377413					22.4542			2.39165	160.588	2.93086	1.25477			982.45	8.82223		0.156682	24.9989	0.159729	1.2342	2.19992	0.85826	11.7321	5.02002	61.288	25.7469	130.688	31.6557	262.486	75.0963	10906.4	1.41437		267.358	799.725	0.334313	799.725	1.13639	5.18527	14.8143
Europe	Romania	Danube River	Balica et al., 2020, Earth and Planetary Science Letters, 531, p.116005.	Danube	Danube.Spot 83	44.9229	29.627	56.402	2.47461			562.047	48.8328	56.402			252.668	101.107	218.964	1.21857			1248.81	26.7834		0.0894073	31.7629	0.153316	1.01086	2.49028	0.753796	14.5884	6.51397	78.569	33.2155	155.99	35.0177	282.93	77.1801	11572.5	3.05582		918.668	1192.65	0.770273	1192.65	-2.53968	3.26468	18.3383
Europe	Romania	Danube River	Balica et al., 2020, Earth and Planetary Science Letters, 531, p.116005.	Danube	Danube.Spot 59	44.9229	29.627	78.5125	1.80189					78.5125			2.44556	158.875	7.92349	1.31577			750.248	2.85485		0.249022	9.0022	0.188021	1.09114	1.74386	0.333328	9.59399	4.2872	52.1944	22.7186	105.45	24.3007	201.397	53.8793	10077.1	0.630046		67.1874	127.103	0.528606	127.103	0.0963435	5.12995	11.3204
Europe	Romania	Danube River	Balica et al., 2020, Earth and Planetary Science Letters, 531, p.116005.	Danube	Danube.Spot 263	44.9229	29.627	79.0504	1.22079			22.0126	51.7639	79.0504			3.59927	189.715	7.65578	1.28161			679.569	5.97617		0.00233135	14.1537	0.0590929	0.729823	1.50983	0.201316	8.13847	3.65056	44.8499	19.8865	101.602	23.3736	208.647	56.6651	13240.9	1.63273		181.645	423.812	0.428598	423.812	-0.133631	6.12577	10.5082
Europe	Romania	Danube River	Balica et al., 2020, Earth and Planetary Science Letters, 531, p.116005.	Danube	Danube.Spot 231	44.9229	29.627	89.4217	1.72185			1148.36	154.656	89.4217			116.19	5761.02	10.5036	1.31567			844.25	6.79879		76.6437	229.3	37.1117	89.1681	14.4513	1.38497	18.7267	5.40472	58.6239	24.6756	121.498	29.0713	255.241	75.6912	10863.2	1.51039		165.166	344.126	0.479956	344.126	4.60834	186.019	16.1409
Europe	Romania	Danube River	Balica et al., 2020, Earth and Planetary Science Letters, 531, p.116005.	Danube	Danube.Spot 105	44.9229	29.627	147.961	3.59423			178.961	36.6426	147.961			3.80628	1865.11	15.0412	1.3564			723.737	5.83323		34.3854	130.759	13.0922	30.1855	5.7711	1.16409	11.2833	4.17049	47.4121	20.7504	102.636	25.1045	216.931	65.1685	10803.3	1.36908		415.46	789.591	0.526171	789.591	2.60035	60.2232	12.5735
Europe	Romania	Danube River	Balica et al., 2020, Earth and Planetary Science Letters, 531, p.116005.	Danube	Danube.Spot 194	44.9229	29.627	246.203	11.0079			250.054	66.2792	246.203			19.1069	305.682	8.68617	1.64777			1024.69	1.4462		0.00170686	0.638609	0.0898845	1.24369	2.90673	0.215124	15.8109	7.03745	76.4422	30.2022	140.132	29.9964	232.891	60.439	9574.58	0.268176		28.9167	95.2918	0.303454	95.2918	-4.32752	9.87027	15.0652
Europe	Romania	Danube River	Balica et al., 2020, Earth and Planetary Science Letters, 531, p.116005.	Danube	Danube.Spot 81	44.9229	29.627	262.472	3.13443			379.933	43.1363	262.472			63.7145	114.524	11.1986	1.20393			1140.04	4.90594		0.034564	12.642	0.332053	3.4212	4.96785	0.13734	20.6974	8.09226	91.2377	36.0241	156.525	31.5335	234.072	59.46	8100.39	0.841283		93.4882	139.919	0.668159	139.919	0.302171	3.69791	16.7511
Europe	Romania	Danube River	Balica et al., 2020, Earth and Planetary Science Letters, 531, p.116005.	Danube	Danube.Spot 225	44.9229	29.627	268.534	3.51398			247.473	93.7042	268.534			17.8985	172.703	83.9086	1.21122			985.447	7.84689		0.0562289	12.226	0.710714	5.84896	6.75373	0.803521	22.5059	8.5489	84.9878	30.4261	128.232	26.6062	202.271	50.2056	9085.78	1.63947		52.997	61.4782	0.862046	61.4782	-0.79038	5.57645	14.5522
Europe	Romania	Danube River	Balica et al., 2020, Earth and Planetary Science Letters, 531, p.116005.	Danube	Danube.Spot 178	44.9229	29.627	271.635	3.19999					271.635			32.0386	178.077	74.351	1.18367			617.621	7.34818		0.0181411	9.91261	0.251337	2.54276	3.54801	0.496894	12.8199	5.27464	53.8808	20.168	88.9233	18.9999	148.605	35.8681	8752.27	1.55266		35.4652	50.1865	0.706668	50.1865	-0.873416	5.75	9.34057
Europe	Romania	Danube River	Balica et al., 2020, Earth and Planetary Science Letters, 531, p.116005.	Danube	Danube.Spot 229	44.9229	29.627	274.759	4.15572			218.74	21.011	274.759			0.490715	264.824	8.00155	1.27691			2101.35	7.09464		0.0189492	16.5819	0.217512	2.32157	4.91074	0.525732	26.8966	12.6242	149.621	63.3947	282.25	58.1755	415.808	110.216	9133.59	1.73171		233.218	520.514	0.448054	520.514	-0.0754936	8.55098	30.4285
Europe	Romania	Danube River	Balica et al., 2020, Earth and Planetary Science Letters, 531, p.116005.	Danube	Danube.Spot 254	44.9229	29.627	283.437	4.95472			349.295	15.7047	283.437			90.0831	3558.27	9.11901	1.46319			1151.57	8.32266		55.0555	153.59	30.6406	91.8593	20.759	1.28019	26.8833	8.53518	85.397	33.0128	150.239	33.2101	262.132	67.5178	11307.8	2.44669		824.472	2463.72	0.334644	2463.72	2.32635	114.894	19.3923
Europe	Romania	Danube River	Balica et al., 2020, Earth and Planetary Science Letters, 531, p.116005.	Danube	Danube.Spot 186	44.9229	29.627	294.098	12.5721			3066.44	109.009	294.098			414.83	96.5946	272.209	0.00510024			462.385	91.7718		63.0743	396.009	110.262	337.456	78.8868	26.7096	76.2461	14.6101	73.1417	15.9351	41.4642	4.95269	20.8695	5.46975	11.8901	63.7182		9.46057	28.5658	0.331186	28.5658	4.89202	3.11897	13.8573
Europe	Romania	Danube River	Balica et al., 2020, Earth and Planetary Science Letters, 531, p.116005.	Danube	Danube.Spot 38	44.9229	29.627	299.236	7.50439			336.581	27.9791	299.236			1.09967	226.148	3.09193	1.27742			1273.38	11.624		1.59212	23.0236	1.00666	3.50131	2.58015	0.304825	12.5552	6.30493	78.4163	35.5349	177.73	42.0273	330.446	95.0314	10286.3	3.33173		264.934	942.617	0.281063	942.617	0.804301	7.30215	19.1309
Europe	Romania	Danube River	Balica et al., 2020, Earth and Planetary Science Letters, 531, p.116005.	Danube	Danube.Spot 140	44.9229	29.627	309.817	4.92183			269.289	44.2026	309.817			3.33104	168.561	19.0855	1.28795			736.169	2.56071		0.00413609	15.5215	0.0949673	1.11699	2.4216	0.44729	11.0592	4.61496	52.8156	22.1613	97.7042	20.8069	169.898	44.0103	9439.89	0.505113		86.4883	120.699	0.716562	120.699	0.323903	5.44273	10.9181
Europe	Romania	Danube River	Balica et al., 2020, Earth and Planetary Science Letters, 531, p.116005.	Danube	Danube.Spot 249	44.9229	29.627	312.282	5.25753			132.204	41.9286	312.282			2.57296	72.1751	6.58201	1.16658			499.738	2.90526		0.0361408	18.98	0.743313	6.34132	6.39227	2.84822	17.4879	5.38644	46.2817	16.0903	65.446	13.6166	113.971	27.3977	7635.05	0.432648		135.072	130.456	1.03539	130.456	1.52992	2.33048	7.68182
Europe	Romania	Danube River	Balica et al., 2020, Earth and Planetary Science Letters, 531, p.116005.	Danube	Danube.Spot 235	44.9229	29.627	314.862	4.43324			383.252	65.0205	314.862			180.869	324.828	27.8558	1.4072			999.365	2.33351		0.35828	5.82439	0.386689	2.92142	4.50354	0.195723	17.399	7.22183	76.6931	29.8575	130.728	27.4061	215.545	52.9919	11053.1	0.354586		64.1703	81.0324	0.79191	81.0324	-1.36032	10.4885	14.6406
Europe	Romania	Danube River	Balica et al., 2020, Earth and Planetary Science Letters, 531, p.116005.	Danube	Danube.Spot 163	44.9229	29.627	315.479	4.21325			112.052	37.5289	315.479			1.7109	203.833	28.4649	1.44588			1127.51	1.71536		0.0154293	3.87781	0.407595	5.12241	8.4329	0.574727	29.4487	10.1575	96.5176	34.1031	138.952	27.2384	200.522	47.6196	9612.83	0.317102		117.547	118.206	0.994418	118.206	-2.4132	6.58163	16.2833
Europe	Romania	Danube River	Balica et al., 2020, Earth and Planetary Science Letters, 531, p.116005.	Danube	Danube.Spot 224	44.9229	29.627	316.166	7.52681			356.788	43.5765	316.166			10.1695	323.665	10.7172	1.29435			1125.49	3.73994		0.00348863	1.78608	0.0683064	0.762321	1.79273	0.0394029	10.7189	5.48192	74.7273	33.5821	171.66	40.7389	324.762	87.008	13404	1.52536		57.5224	442.771	0.129915	442.771	-4.05775	10.4509	17.0976
Europe	Romania	Danube River	Balica et al., 2020, Earth and Planetary Science Letters, 531, p.116005.	Danube	Danube.Spot 170	44.9229	29.627	317.523	8.2851			254.032	28.2792	317.523			19.0985	198.708	13.1078	1.27511			1324.26	4.49156		0.0441793	7.99421	0.221233	2.77975	5.2356	0.237032	23.2121	9.79922	105.691	40.7133	177.687	35.7651	251.941	60.3327	10908.7	0.903973		138.594	280.086	0.494826	280.086	-1.23278	6.41615	19.1913
Europe	Romania	Danube River	Balica et al., 2020, Earth and Planetary Science Letters, 531, p.116005.	Danube	Danube.Spot 134	44.9229	29.627	318.72	6.73645			243.673	30.6767	318.72			2.74441	176.164	6.64895	1.4624			1795.17	4.66646		0.00949509	6.27702	0.259793	3.58736	6.57852	0.486035	30.0948	12.6938	137.322	55.8992	240.826	49.1425	338.601	88.3695	10019.7	0.989329		143.928	309.536	0.46498	309.536	-1.1502	5.68822	25.9584
Europe	Romania	Danube River	Balica et al., 2020, Earth and Planetary Science Letters, 531, p.116005.	Danube	Danube.Spot 260	44.9229	29.627	321.253	4.60014			297.031	31.0281	321.253			0.102471	59.5439	9.34879	1.27889			266.373	2.48494		0.0166903	17.1155	0.2755	2.49299	3.08944	0.958965	8.51099	2.60693	23.1154	8.16534	32.5741	6.60655	71.909	14.5487	11058.8	0.305831		55.5966	141.938	0.391696	141.938	0.972509	1.92263	4.15936
Europe	Romania	Danube River	Balica et al., 2020, Earth and Planetary Science Letters, 531, p.116005.	Danube	Danube.Spot 255	44.9229	29.627	321.977	4.80889			162.313	45.8185	321.977			0.816597	103.877	16.4408	1.24047			806.1	2.49719		0.0577444	6.27617	0.251147	2.93794	4.91637	0.31247	18.4898	7.03151	70.0906	26.2988	108.362	21.3835	159.41	37.6389	9521.07	0.423021		67.006	94.0149	0.712717	94.0149	-0.901867	3.35411	11.8325
Europe	Romania	Danube River	Balica et al., 2020, Earth and Planetary Science Letters, 531, p.116005.	Danube	Danube.Spot 60	44.9229	29.627	323.134	7.55756			326.331	29.6781	323.134			23.7247	439.399	10.6145	1.45379			1513.58	4.10385		0.00514604	2.93478	0.102323	1.36622	3.74987	0.0563194	18.4594	9.41184	115.637	48.6135	221.219	49.7425	356.888	95.8063	12178.5	0.940452		154.894	514.333	0.301156	514.333	-3.31718	14.1879	22.4912
Europe	Romania	Danube River	Balica et al., 2020, Earth and Planetary Science Letters, 531, p.116005.	Danube	Danube.Spot 22	44.9229	29.627	324.586	5.90084			277.694	38.6839	324.586			3.43138	183.829	16.2497	1.26393			1379.66	2.63997		0.0137709	19.1351	0.324428	3.48566	5.79449	0.795169	22.9937	9.1681	98.6335	39.9269	173.788	35.1265	264.168	66.1878	10594	0.643337		154.041	176.011	0.875179	176.011	0.499447	5.93572	19.9302
Europe	Romania	Danube River	Balica et al., 2020, Earth and Planetary Science Letters, 531, p.116005.	Danube	Danube.Spot 152	44.9229	29.627	332.142	4.34992			279.882	31.1977	332.142			5.69571	250.599	14.5321	1.38341			900.382	2.95001		0.297727	4.77344	0.525584	4.15244	5.25098	0.232854	18.4755	7.26897	72.4583	28.5445	120.942	24.5139	188.247	45.9836	10380.9	0.488044		74.9744	143.083	0.523991	143.083	-1.63455	8.09166	13.2337
Europe	Romania	Danube River	Balica et al., 2020, Earth and Planetary Science Letters, 531, p.116005.	Danube	Danube.Spot 185	44.9229	29.627	332.257	7.00216			322.76	49.7681	332.257			176.583	263.697	18.0807	1.3065			1136.4	2.40077		0.0536329	3.02161	0.380591	4.31808	6.59332	0.254136	24.8138	9.44486	92.7701	33.9435	140.588	27.3577	206.125	51.3403	9758.98	0.472433		71.1567	141.164	0.504072	141.164	-2.60648	8.51458	16.3634
Europe	Romania	Danube River	Balica et al., 2020, Earth and Planetary Science Letters, 531, p.116005.	Danube	Danube.Spot 169	44.9229	29.627	335.152	12.9087			429.101	35.3971	335.152			145.14	570.017	55.869	1.50791			2612.72	4.92623		0.49517	9.60695	0.497711	4.31791	7.18422	0.44785	37.8984	17.4595	201.218	84.2733	353.693	74.2599	497.735	138.559	10421.7	1.02361		147.262	383.525	0.383969	383.525	-2.44522	18.4055	37.8669
Europe	Romania	Danube River	Balica et al., 2020, Earth and Planetary Science Letters, 531, p.116005.	Danube	Danube.Spot 37	44.9229	29.627	336	7.49049			276.514	43.5841	336			37.8313	371.707	12.5146	1.477			1672.21	2.99523		0.0288495	4.17778	0.375539	4.14523	7.6532	0.283739	30.2213	12.7396	129.873	50.1741	210.287	43.3387	313.554	78.9334	11009.7	0.626163		130.27	277.223	0.46991	277.223	-2.31041	12.0022	24.076
Europe	Romania	Danube River	Balica et al., 2020, Earth and Planetary Science Letters, 531, p.116005.	Danube	Danube.Spot 126	44.9229	29.627	337.032	7.29415			295.123	21.5306	337.032			24.6654	324.096	13.8713	1.49249			1157.71	2.7757		0.00495887	2.88854	0.135344	1.98026	4.03165	0.120442	17.5381	8.16529	88.7037	33.4084	144.722	29.6427	224.936	54.0623	10979.9	0.642445		76.2983	340.024	0.224391	340.024	-3.21779	10.4648	16.6458
Europe	Romania	Danube River	Balica et al., 2020, Earth and Planetary Science Letters, 531, p.116005.	Danube	Danube.Spot 98	44.9229	29.627	338.287	4.73738			271.531	38.3688	338.287			4.91805	145.649	8.48353	1.31261			561.875	4.67043		0.000958554	10.7249	0.0460458	0.552622	1.17105	0.173119	6.81799	3.14759	40.5552	17.4049	84.5271	18.7554	160.837	38.7777	11147.6	1.10524		61.8733	172.681	0.35831	172.681	0.075029	4.70291	8.59524
Europe	Romania	Danube River	Balica et al., 2020, Earth and Planetary Science Letters, 531, p.116005.	Danube	Danube.Spot 96	44.9229	29.627	339.032	13.1911			332.368	28.7075	339.032			0.621198	76.0932	7.79556	1.2669			1537.84	4.91745		0.0246641	42.2841	0.540182	5.5218	8.36568	3.04052	30.4177	11.1219	114.682	43.2827	194.792	42.3513	315.807	88.1555	8993.1	0.857768		344.771	351.078	0.982034	351.078	1.91439	2.457	22.6931
Europe	Romania	Danube River	Balica et al., 2020, Earth and Planetary Science Letters, 531, p.116005.	Danube	Danube.Spot 64	44.9229	29.627	340.895	5.49354			310.945	26.6555	340.895			0.912187	291.25	8.75143	1.25506			1204.8	5.17194		0.0035846	7.02887	0.107036	1.20553	3.05838	0.0564306	15.9396	7.95786	90.3566	36.218	161.839	33.255	249.838	60.6602	11854.1	1.07931		177.805	354.564	0.501474	354.564	-1.31021	9.40426	17.5136
Europe	Romania	Danube River	Balica et al., 2020, Earth and Planetary Science Letters, 531, p.116005.	Danube	Danube.Spot 95	44.9229	29.627	344.646	6.93245			316.026	31.3891	344.646			112.849	180.047	62.9003	1.31533			334.172	3.63658		0.0304939	4.68451	0.475975	4.72991	7.05769	1.15151	21.1146	6.13049	40.6206	10.3823	29.3404	4.40701	47.6032	5.1822	11209.1	0.877024		113.692	267.883	0.42441	267.883	-3.48365	5.8136	4.87514
Europe	Romania	Danube River	Balica et al., 2020, Earth and Planetary Science Letters, 531, p.116005.	Danube	Danube.Spot 44	44.9229	29.627	345.94	13.2868			330.04	23.6326	345.94			45.7814	360.249	35.3579	1.29253			1321.59	3.51187		0.021675	7.00607	0.437534	4.82622	7.80378	0.804039	28.1546	10.5487	102.788	39.621	169.667	33.5311	234.97	60.7183	11853.5	0.691172		266.793	342.087	0.779898	342.087	-2.49696	11.6322	19.0452
Europe	Romania	Danube River	Balica et al., 2020, Earth and Planetary Science Letters, 531, p.116005.	Danube	Danube.Spot 214	44.9229	29.627	352.756	7.41842			367.654	14.794	352.756			11.4155	366.753	3.93397	1.41311			1723.44	36.1422		0.0167427	18.6945	0.0487101	0.725623	2.18939	0.351974	15.8522	8.7811	115.153	51.4929	251.227	56.4657	445.398	122.905	12551.6	13.7386		130.786	652.46	0.20045	652.46	0.552947	11.8422	25.8303
Europe	Romania	Danube River	Balica et al., 2020, Earth and Planetary Science Letters, 531, p.116005.	Danube	Danube.Spot 7	44.9229	29.627	353.588	6.46156			301.543	19.5203	353.588			19.7101	410.415	8.85355	1.63093			1482.11	4.56001		0.00755829	2.74815	0.138857	1.6508	3.71512	0.148801	19.4986	8.57315	103.752	42.8966	205.471	44.1027	351.172	94.4355	11786.3	1.86152		112.491	697.857	0.161195	697.857	-3.53869	13.252	21.8636
Europe	Romania	Danube River	Balica et al., 2020, Earth and Planetary Science Letters, 531, p.116005.	Danube	Danube.Spot 228	44.9229	29.627	354.045	6.03869			274.738	34.1053	354.045			105.798	113.955	14.6854	1.22152			157.437	1.23549		0.00622933	3.10061	0.171816	1.69737	2.94227	0.257697	8.76901	2.55168	16.9241	4.58749	14.8425	2.58449	41.7052	3.55498	12436.2	0.204285		60.943	264.646	0.230281	264.646	-2.92671	3.67953	2.39641
Europe	Romania	Danube River	Balica et al., 2020, Earth and Planetary Science Letters, 531, p.116005.	Danube	Danube.Spot 26	44.9229	29.627	355.691	5.44485			334.685	21.9019	355.691			2.25849	282.875	3.14962	1.43521			1741.49	8.05576		0.00881906	4.93737	0.150803	2.04134	4.55948	0.15414	23.2037	10.9766	125.277	52.922	238.915	51.1689	365.809	93.6606	11879.1	2.64049		231.259	882.634	0.26201	882.634	-1.82803	9.13385	25.3591
Europe	Romania	Danube River	Balica et al., 2020, Earth and Planetary Science Letters, 531, p.116005.	Danube	Danube.Spot 12	44.9229	29.627	356.309	5.61219			329.264	19.8403	356.309			6.05108	218.037	4.55455	1.71336			1184.71	3.39757		0.00112288	0.32108	0.0206693	0.309964	1.30596	0.216717	10.6628	6.17076	79.0329	35.0231	149.591	32.0386	243.627	56.239	13637.3	0.809902		15.8202	664.614	0.0238036	664.614	-6.64711	7.04025	16.959
Europe	Romania	Danube River	Balica et al., 2020, Earth and Planetary Science Letters, 531, p.116005.	Danube	Danube.Spot 142	44.9229	29.627	356.623	4.75646			367.261	26.8258	356.623			2.39943	93.464	3.36856	1.26263			337.699	3.07505		0.00162413	3.67616	0.0287627	0.414442	1.21977	0.233417	6.67499	2.88858	28.365	9.89345	40.7397	8.18227	78.5127	15.5868	10867.6	1.14641		47.9216	495.944	0.0966269	495.944	-1.89808	3.01789	4.96737
Europe	Romania	Danube River	Balica et al., 2020, Earth and Planetary Science Letters, 531, p.116005.	Danube	Danube.Spot 196	44.9229	29.627	356.858	4.63937			364.57	22.1126	356.858			11.1037	273.704	5.81287	1.47075			1429.62	9.34883		0.00637312	4.75944	0.0952735	1.46349	4.45377	0.444109	24.902	11.102	110.851	40.1926	159.398	30.2559	223.847	51.3955	11102.5	1.66744		100.19	545.12	0.183794	545.12	-2.00539	8.8377	20.0314
Europe	Romania	Danube River	Balica et al., 2020, Earth and Planetary Science Letters, 531, p.116005.	Danube	Danube.Spot 106	44.9229	29.627	357.138	7.64371			467.563	43.2986	357.138			50.222	327.931	40.6089	1.68655			1379.52	8.82829		0.0111307	5.54942	0.139262	2.06374	6.85589	0.355045	37.1083	13.945	121.686	38.6721	131.506	22.3274	155.674	31.5407	12489.9	1.11411		114.481	407.889	0.280666	407.889	-3.17461	10.5887	18.9254
Europe	Romania	Danube River	Balica et al., 2020, Earth and Planetary Science Letters, 531, p.116005.	Danube	Danube.Spot 42	44.9229	29.627	357.219	5.9702			297.422	27.107	357.219			101.266	439.936	23.8572	1.46556			1424.59	1.61897		0.0238547	2.10901	0.456429	5.21153	8.02514	0.179255	29.7105	11.4257	113.562	43.2575	181.605	38.5979	287.969	72.7501	10193.2	0.264142		119.461	185.223	0.644956	185.223	-3.70732	14.2052	20.7491
Europe	Romania	Danube River	Balica et al., 2020, Earth and Planetary Science Letters, 531, p.116005.	Danube	Danube.Spot 29	44.9229	29.627	359.869	7.21765			222.568	32.2088	359.869			74.6458	592.56	14.5363	1.78889			1950.67	2.24552		0.00536562	1.31567	0.144336	2.0585	5.35438	0.123176	26.5806	12.6972	145.235	60.2976	267.022	56.8707	404.271	107.094	11894.5	0.527467		69.1194	257.121	0.268821	257.121	-4.38126	19.1334	28.392
Europe	Romania	Danube River	Balica et al., 2020, Earth and Planetary Science Letters, 531, p.116005.	Danube	Danube.Spot 182	44.9229	29.627	360.997	7.38594			328.668	32.9904	360.997			11.8132	83.8894	44.7952	1.4426			148.268	7.3619		0.0291556	3.14272	0.0754	0.645732	0.750157	0.302423	3.42128	1.35834	13.2692	4.25273	15.6729	2.7866	45.7259	4.21612	13053.9	1.84163		19.4175	225.506	0.0861062	225.506	-3.73255	2.70873	2.23861
Europe	Romania	Danube River	Balica et al., 2020, Earth and Planetary Science Letters, 531, p.116005.	Danube	Danube.Spot 166	44.9229	29.627	366.148	6.86096			255.33	29.5205	366.148			0.720211	143.546	11.4199	1.35117			1009.38	2.84604		0.0170912	5.12156	0.344975	3.47315	5.31958	0.794125	20.6694	7.55331	77.4204	29.5831	129.504	26.6095	206.33	52.8454	9661.85	0.593044		129.559	231.733	0.559087	231.733	-1.72169	4.635	14.7182
Europe	Romania	Danube River	Balica et al., 2020, Earth and Planetary Science Letters, 531, p.116005.	Danube	Danube.Spot 191	44.9229	29.627	370.523	6.52526			448.78	19.412	370.523			29.9466	385.737	11.017	1.49682			1278.21	2.0949		0.00643563	0.276268	0.025005	0.274076	0.996663	0.0352267	7.55861	5.40494	79.2964	36.6603	185.652	42.2389	320.149	90.0199	13753.9	1.06651		13.8213	560.835	0.0246441	560.835	-7.52756	12.4552	18.9051
Europe	Romania	Danube River	Balica et al., 2020, Earth and Planetary Science Letters, 531, p.116005.	Danube	Danube.Spot 146	44.9229	29.627	378.354	10.721			348.39	39.3583	378.354			0.451027	233.1	12.3253	1.3581			1435.26	2.8808		0.00852477	2.99232	0.220266	2.9941	5.13097	0.20207	24.0704	10.1209	109.127	42.9669	184.616	35.8213	256.423	65.6219	10375.3	0.58426		66.5253	159.556	0.41694	159.556	-2.39705	7.52664	20.5446
Europe	Romania	Danube River	Balica et al., 2020, Earth and Planetary Science Letters, 531, p.116005.	Danube	Danube.Spot 2	44.9229	29.627	378.864	7.4884			339.223	24.1562	378.864			6.98636	179.114	2.16524	1.28759			2043.52	4.01702		0.0158485	15.1806	0.287137	3.55392	6.54111	1.10579	30.311	12.81	145.036	58.9871	277.206	60.0518	427.809	128.446	11061.8	0.853004		170.763	379.316	0.450186	379.316	1.18069	5.78346	29.9141
Europe	Romania	Danube River	Balica et al., 2020, Earth and Planetary Science Letters, 531, p.116005.	Danube	Danube.Spot 24	44.9229	29.627	393.074	7.815			335.328	26.7837	393.074			1.27565	164.304	8.80968	1.37965			541.866	3.20351		0.00562485	3.70862	0.205557	2.98138	7.03823	0.51074	30.8325	9.73209	68.0049	17.5469	51.1483	7.92357	69.4202	10.5783	11881.6	0.583454		53.5529	247.603	0.216285	247.603	-2.11438	5.30527	7.79033
Europe	Romania	Danube River	Balica et al., 2020, Earth and Planetary Science Letters, 531, p.116005.	Danube	Danube.Spot 104	44.9229	29.627	420.963	9.88262			479.01	19.7185	420.963			47.6322	908.948	9.72814	1.64145			3398.12	4.19698		0.0203012	3.82691	0.0950837	0.966313	3.39262	0.129248	25.2648	15.7786	218.932	97.4667	470.138	104.139	692.742	189.599	11533.4	1.2781		52.3433	365.571	0.143182	365.571	-2.48422	29.3493	48.9927
Europe	Romania	Danube River	Balica et al., 2020, Earth and Planetary Science Letters, 531, p.116005.	Danube	Danube.Spot 149	44.9229	29.627	421.956	6.69577			428.079	23.8198	421.956			77.9292	1478.53	5.28018	2.75562			5262.59	6.86959		0.0990767	0.909642	0.150459	1.21792	5.0448	0.267642	36.2695	26.484	361.64	148.196	640.337	134.011	894.86	190.394	13599.4	2.97364		66.9003	1365.55	0.0489913	1365.55	-5.59249	47.7408	73.6486
Europe	Romania	Danube River	Balica et al., 2020, Earth and Planetary Science Letters, 531, p.116005.	Danube	Danube.Spot 88	44.9229	29.627	423.233	6.75045			519.035	28.1887	423.233			13.7588	75.3037	2.93426	1.24997			147.366	1.20679		0.00419051	0.322281	0.0254406	0.243194	0.456512	0.161657	2.06443	0.912747	10.6941	4.25587	18.9935	4.04984	55.3587	7.90084	12222.3	0.3078		4.83882	339.021	0.0142729	339.021	-5.67453	2.4315	2.2789
Europe	Romania	Danube River	Balica et al., 2020, Earth and Planetary Science Letters, 531, p.116005.	Danube	Danube.Spot 222	44.9229	29.627	437.334	15.102			564.289	41.4593	437.334			223.152	531.01	27.9408	1.30126			1930.87	2.30938		0.302866	1.19666	0.165918	0.884611	2.37941	0.0599265	16.5678	9.96734	129.452	57.8152	264.3	54.8601	372	102.274	10702.3	0.812285		21.4663	143.382	0.149713	143.382	-4.60614	17.1459	27.7072
Europe	Romania	Danube River	Balica et al., 2020, Earth and Planetary Science Letters, 531, p.116005.	Danube	Danube.Spot 127	44.9229	29.627	447.562	13.2759			391.654	37.1094	447.562			23.3488	633.216	12.312	1.76054			2247.76	3.18945		0.00710049	1.34477	0.108558	1.44598	4.11986	0.124744	25.9538	12.8805	159.101	68.4034	319.061	68.842	514.977	129.626	11583.3	0.757871		58.3291	225.628	0.258519	225.628	-4.08567	20.4461	33.0033
Europe	Romania	Danube River	Balica et al., 2020, Earth and Planetary Science Letters, 531, p.116005.	Danube	Danube.Spot 156	44.9229	29.627	458.447	7.76924			387.167	31.58	458.447			0.726663	139.336	12.0715	1.18595			1566.06	1.70086		0.00769412	2.77582	0.276482	3.23309	5.75219	0.371507	26.6691	10.9144	119.926	48.0504	202.074	39.4521	284.713	69.8294	9412.08	0.317845		82.3814	179.255	0.459575	179.255	-2.61045	4.49908	22.4538
Europe	Romania	Danube River	Balica et al., 2020, Earth and Planetary Science Letters, 531, p.116005.	Danube	Danube.Spot 220	44.9229	29.627	462.37	18.3724			585.038	12.9189	462.37			204.675	502.326	23.3211	1.11049			6584.58	158.557		3.05356	52.7842	2.9258	16.716	21.1046	0.912497	102.036	45.9738	504.937	200.348	850.809	177.817	1216.54	300.705	10713.8	20.0793		435.769	1114.82	0.390889	1114.82	0.345081	16.2198	94.8938
Europe	Romania	Danube River	Balica et al., 2020, Earth and Planetary Science Letters, 531, p.116005.	Danube	Danube.Spot 154	44.9229	29.627	463.278	11.5678			429.6	30.3088	463.278			243.367	655.651	56.1475	1.52829			1576.05	4.91132		8.88593	36.2983	6.86442	22.4781	6.2509	0.610105	20.4788	8.94989	108.951	46.5118	219.545	47.1355	337.893	94.221	9990.52	0.828995		80.1149	164.114	0.488166	164.114	0.59544	21.1705	23.5224
Europe	Romania	Danube River	Balica et al., 2020, Earth and Planetary Science Letters, 531, p.116005.	Danube	Danube.Spot 207	44.9229	29.627	463.39	7.87513			485.113	27.4674	463.39			513.083	720.98	16.1172	1.52827			2565.37	2.43363		0.0168631	0.6149	0.0875148	0.852265	2.68874	0.0551364	19.2202	11.5172	166.19	76.2271	371.729	84.2539	601.187	159.593	12596.8	0.549942		32.6767	193.515	0.168858	193.515	-5.54487	23.28	37.6716
Europe	Romania	Danube River	Balica et al., 2020, Earth and Planetary Science Letters, 531, p.116005.	Danube	Danube.Spot 54	44.9229	29.627	464.507	9.05546			486.226	26.9927	464.507			168.2	785.399	13.6165	1.62388			3108.42	4.13975		0.117868	2.46228	0.269713	2.337	5.69094	0.121087	34.7019	17.8021	220.305	92.9556	406.501	83.7506	564.821	149.573	11509.1	0.819523		116.042	301.451	0.384945	301.451	-3.37438	25.36	44.3359
Europe	Romania	Danube River	Balica et al., 2020, Earth and Planetary Science Letters, 531, p.116005.	Danube	Danube.Spot 41	44.9229	29.627	465.841	9.01601			448.378	24.1196	465.841			48.7397	785.382	7.21221	1.65655			2823.32	2.97617		0.0068347	0.821077	0.0948363	1.1079	3.4005	0.0451576	23.8337	13.716	184.922	80.2713	368.131	79.3642	564.76	147.681	12703.2	0.732145		66.3983	352.978	0.188109	352.978	-4.86652	25.3594	40.435
Europe	Romania	Danube River	Balica et al., 2020, Earth and Planetary Science Letters, 531, p.116005.	Danube	Danube.Spot 141	44.9229	29.627	467.054	7.97149			441.137	17.5575	467.054			125.501	1174.84	9.90142	1.75434			4571.27	3.19638		0.0280618	1.02239	0.252861	2.58896	6.43909	0.0657094	41.6717	25.5173	321.305	131.302	573.175	117.401	780.734	194.32	12699.3	0.855484		85.8855	641.714	0.133838	641.714	-5.27982	37.9348	64.4317
Europe	Romania	Danube River	Balica et al., 2020, Earth and Planetary Science Letters, 531, p.116005.	Danube	Danube.Spot 244	44.9229	29.627	467.778	10.5015			464.712	21.9982	467.778			57.9363	321.73	10.3685	1.31577			1490.47	20.0852		2.23855	22.7382	1.42292	6.075	5.10183	0.681805	23.2303	9.92669	112.474	46.2179	199.347	41.4504	306.066	80.2102	8697.13	3.20313		203.296	169.297	1.20083	169.297	1.22282	10.3885	21.8808
Europe	Romania	Danube River	Balica et al., 2020, Earth and Planetary Science Letters, 531, p.116005.	Danube	Danube.Spot 135	44.9229	29.627	471.005	6.55695			409.394	30.9164	471.005			105.535	949.824	15.6157	1.43576			2902.88	2.47602		2.35079	9.44996	2.05525	8.35014	7.12785	0.0954661	33.0986	16.8693	208.632	87.1881	405.958	84.0603	547.555	151.173	11715.1	0.465388		63.0988	169.692	0.371843	169.692	-0.659256	30.6692	41.9387
Europe	Romania	Danube River	Balica et al., 2020, Earth and Planetary Science Letters, 531, p.116005.	Danube	Danube.Spot 99	44.9229	29.627	473.717	9.3183			440.037	23.6099	473.717			1.32795	140.826	13.1452	1.28079			676.694	1.94331		0.00185944	4.08171	0.0714704	0.731539	1.53722	0.115354	9.23424	4.13584	49.0024	20.8252	93.8987	20.0162	165.588	39.566	12182.9	0.443056		182.885	331.983	0.550885	331.983	-2.54998	4.54717	10.0326
Europe	Romania	Danube River	Balica et al., 2020, Earth and Planetary Science Letters, 531, p.116005.	Danube	Danube.Spot 179	44.9229	29.627	475.06	26.0095			1563.96	188.885	475.06			98.8262	445.153	8.27187	1.03019			1850.42	2.89219		0.00722824	2.27782	0.117604	1.32307	3.81503	0.130222	21.8568	11.1599	129.534	53.9677	236.161	49.7856	334.743	80.8547	7648.01	0.512172		62.4484	142.899	0.437011	142.899	-2.42883	14.3737	26.303
Europe	Romania	Danube River	Balica et al., 2020, Earth and Planetary Science Letters, 531, p.116005.	Danube	Danube.Spot 3	44.9229	29.627	477.454	8.51265			537.089	28.1071	477.454			132.511	449.844	313.053	1.89805			2236.03	5.4607		0.0610799	2.5143	0.424692	4.67809	8.11842	0.669729	36.4398	15.8261	170.404	70.5295	303.288	62.6005	419.36	117.085	9117.57	0.630816		88.602	185.203	0.478404	185.203	-5.6369	14.5251	32.3472
Europe	Romania	Danube River	Balica et al., 2020, Earth and Planetary Science Letters, 531, p.116005.	Danube	Danube.Spot 65	44.9229	29.627	479.438	9.15917			433.891	23.084	479.438			58.9821	979.262	15.1439	1.69339			3571.33	2.82831		0.0167194	0.761579	0.0934097	1.15958	3.53327	0.0784011	25.7947	16.5103	236.373	103.538	497.217	108.883	749.43	201.943	12245.7	0.758907		34.1974	317.692	0.107643	317.692	-5.54971	31.6197	51.6611
Europe	Romania	Danube River	Balica et al., 2020, Earth and Planetary Science Letters, 531, p.116005.	Danube	Danube.Spot 101	44.9229	29.627	482.681	10.0526			468.162	26.5747	482.681			64.061	825.377	15.4199	1.64619			3055.77	3.01882		0.00344049	0.852266	0.0856852	1.16792	4.02417	0.0944079	28.7514	16.5998	213.178	92.4296	425.45	91.0727	621.641	167.404	11970.3	0.654611		40.5559	260.717	0.155555	260.717	-5.19846	26.6508	44.205
Europe	Romania	Danube River	Balica et al., 2020, Earth and Planetary Science Letters, 531, p.116005.	Danube	Danube.Spot 176	44.9229	29.627	486.012	10.1316			551.7	21.9592	486.012			121.563	879.386	9.00525	1.09421			1959.79	32.7678		5.09638	42.0723	5.4144	22.6043	12.8375	0.382643	40.4534	15.1752	161.4	62.5185	263.766	50.8445	355.157	90.1522	9159.86	5.39064		129.057	414.011	0.311723	414.011	1.63729	28.3948	28.8345
Europe	Romania	Danube River	Balica et al., 2020, Earth and Planetary Science Letters, 531, p.116005.	Danube	Danube.Spot 82	44.9229	29.627	486.473	11.4038			448.464	27.489	486.473			36.2727	635.709	8.47898	1.67909			2383.48	1.96442		0.00613993	0.850046	0.104612	1.49945	3.58055	0.0747449	23.4521	12.7045	162.201	71.9193	335.714	73.7659	530.23	147.109	12475.3	0.481054		52.4902	254.94	0.205893	254.94	-4.66432	20.5266	34.8629
Europe	Romania	Danube River	Balica et al., 2020, Earth and Planetary Science Letters, 531, p.116005.	Danube	Danube.Spot 47	44.9229	29.627	489.526	7.30723			473.444	20.2835	489.526			22.5603	614.922	5.64696	1.87203			2245.82	4.08944		0.0168539	2.94861	0.101085	1.13054	3.60885	0.133624	24.4303	12.2979	154.757	67.1276	312.452	66.9961	482.241	135.868	12559.1	1.03368		54.6635	279.421	0.195631	279.421	-2.23142	19.8554	32.7357
Europe	Romania	Danube River	Balica et al., 2020, Earth and Planetary Science Letters, 531, p.116005.	Danube	Danube.Spot 230	44.9229	29.627	491.522	9.38798			455.515	21.7297	491.522			28.3338	724.715	8.37023	1.57933			2876.98	2.44109		0.0338699	3.06431	0.237313	2.72479	5.987	0.175828	32.7826	16.2864	202.336	87.1906	405.543	87.3306	612.881	167.414	12016.8	0.70944		120.642	333.439	0.36181	333.439	-2.65971	23.4005	41.9688
Europe	Romania	Danube River	Balica et al., 2020, Earth and Planetary Science Letters, 531, p.116005.	Danube	Danube.Spot 130	44.9229	29.627	494.104	10.4038			485.666	27.2223	494.104			5.52054	127.366	14.0944	1.27621			735.613	3.37166		0.0557769	5.10307	0.078903	0.556022	1.24649	0.144429	7.68735	3.67304	49.0456	22.2362	109.234	24.8767	209.799	56.4571	11276	0.865981		82.2364	246.254	0.33395	246.254	-1.96341	4.11256	11.1686
Europe	Romania	Danube River	Balica et al., 2020, Earth and Planetary Science Letters, 531, p.116005.	Danube	Danube.Spot 124	44.9229	29.627	500.689	6.57647			462.789	26.6587	500.689			19.1367	779.578	6.78889	1.55616			3093.69	2.76811		0.00747233	1.80239	0.157995	1.7993	4.59505	0.122822	28.7081	15.9864	204.76	91.909	427.592	94.4793	643.722	170.443	11803.9	0.663727		91.8652	342.793	0.26799	342.793	-3.42342	25.1721	44.7661
Europe	Romania	Danube River	Balica et al., 2020, Earth and Planetary Science Letters, 531, p.116005.	Danube	Danube.Spot 66	44.9229	29.627	501.586	7.32129			548.208	19.0521	501.586			2.14544	88.8236	2.47886	1.20922			401.568	7.11262		0.00179767	4.9382	0.0128287	0.163376	0.516981	0.122256	4.13788	2.18328	28.1299	11.9743	58.7179	13.7281	131.058	31.4647	12446.7	2.08263		85.9728	614.308	0.139951	614.308	-1.30521	2.86805	6.21274
Europe	Romania	Danube River	Balica et al., 2020, Earth and Planetary Science Letters, 531, p.116005.	Danube	Danube.Spot 209	44.9229	29.627	513.86	10.8642			487.37	22.7997	513.86			2.54077	184.446	11.4456	1.25766			851.06	2.59248		0.00716261	9.20755	0.115878	1.61936	2.92278	0.280442	14.2389	6.02362	65.1318	26.5106	117.021	23.8524	184.038	45.4875	10284.9	0.589425		80.6485	192.2	0.419608	192.2	-0.542793	5.95563	12.5261
Europe	Romania	Danube River	Balica et al., 2020, Earth and Planetary Science Letters, 531, p.116005.	Danube	Danube.Spot 20	44.9229	29.627	514.205	7.61347			468.406	23.5398	514.205			62.8813	1409.75	14.8455	1.79994			5562.67	3.27079		0.0213979	1.07764	0.196268	1.90916	5.83071	0.126901	41.872	26.7713	369.407	168.918	752.189	166.031	1129.96	278.673	12360.5	0.726919		56.6503	345.004	0.164202	345.004	-5.0013	45.5198	79.9658
Europe	Romania	Danube River	Balica et al., 2020, Earth and Planetary Science Letters, 531, p.116005.	Danube	Danube.Spot 52	44.9229	29.627	516.481	7.20989			474.893	35.7226	516.481			2.87033	48.5288	5.56164	1.16273			609.473	2.4806		0.0147671	5.1993	0.25958	2.41809	3.29867	0.79455	12.2457	4.91596	48.4544	18.7434	79.8249	16.2832	134.512	31.3923	9843.82	0.776771		70.3862	119.726	0.587895	119.726	-0.497609	1.56696	8.98935
Europe	Romania	Danube River	Balica et al., 2020, Earth and Planetary Science Letters, 531, p.116005.	Danube	Danube.Spot 122	44.9229	29.627	517.198	8.39086			571.173	23.4481	517.198			119.523	232.065	21.6434	1.3418			987.327	21.3328		0.0186276	1.46917	0.0335868	0.464844	0.93052	0.0472079	6.20887	3.61887	53.6637	26.8767	175.892	52.8523	490.105	186.403	11991.8	4.87179		127.467	593.971	0.214601	593.971	-5.26212	7.49321	16.9429
Europe	Romania	Danube River	Balica et al., 2020, Earth and Planetary Science Letters, 531, p.116005.	Danube	Danube.Spot 84	44.9229	29.627	518.742	14.4967			538.024	17.5528	518.742			117.687	227.935	37.6268	1.11352			4969.91	65.7936		2.15532	61.2701	2.64782	11.1388	9.71149	0.150714	51.6894	27.0197	337.757	145.973	687.299	146.038	1001.49	249.554	12291.3	7.36652		429.541	1287.98	0.333501	1287.98	0.0632934	7.35986	72.1657
Europe	Romania	Danube River	Balica et al., 2020, Earth and Planetary Science Letters, 531, p.116005.	Danube	Danube.Spot 4	44.9229	29.627	519.328	10.704			474.425	23.5574	519.328			54.7512	678.391	7.95028	1.90429			2219.15	2.74769		0.00538626	0.942465	0.0848954	1.07446	3.20786	0.122464	22.3331	12.6597	154.178	64.2975	284.919	62.1461	447.664	119.241	11945.2	0.727384		32.6792	278.439	0.117366	278.439	-4.50577	21.9048	31.8981
Europe	Romania	Danube River	Balica et al., 2020, Earth and Planetary Science Letters, 531, p.116005.	Danube	Danube.Spot 70	44.9229	29.627	519.409	6.57082			510.3	33.9112	519.409			2.50703	75.2522	10.6014	1.2155			379.813	0.886503		0.00268412	2.40687	0.0492421	0.557671	0.943131	0.270575	4.00191	1.93485	25.0772	11.1421	56.9953	13.9417	126.549	34.5371	8223.33	0.134849		22.9851	104.537	0.219875	104.537	-2.27717	2.42984	5.91299
Europe	Romania	Danube River	Balica et al., 2020, Earth and Planetary Science Letters, 531, p.116005.	Danube	Danube.Spot 93	44.9229	29.627	520.653	12.2423			530.21	25.2794	520.653			10.3188	284.608	5.582	1.46905			823.792	3.63635		0.162764	11.5822	0.133556	1.08719	1.61423	0.187875	8.185	4.24817	55.2067	25.3304	121.36	28.3124	244.159	66.7348	12380.7	0.917499		94.1265	227.549	0.413654	227.549	0.332409	9.18978	12.6278
Europe	Romania	Danube River	Balica et al., 2020, Earth and Planetary Science Letters, 531, p.116005.	Danube	Danube.Spot 165	44.9229	29.627	521.789	5.8771			531.087	30.0053	521.789			1.61761	116.456	23.707	1.27987			1021.96	1.53711		0.00490547	15.2557	0.166557	2.13164	4.54617	0.972381	20.427	7.74069	79.2599	30.3134	128.008	26.4742	202.159	50.6232	10307.5	0.283276		79.5006	127.758	0.622275	127.758	0.056317	3.76029	14.8864
Europe	Romania	Danube River	Balica et al., 2020, Earth and Planetary Science Letters, 531, p.116005.	Danube	Danube.Spot 19	44.9229	29.627	523.813	7.64627			553.012	31.3223	523.813			6.99739	127.602	11.0092	1.14628			1158.94	7.40118		0.00805519	14.7238	0.283113	3.42635	5.62671	0.508064	23.8971	9.23563	96.0431	37.7837	156.619	30.7174	230.191	58.2247	7293.89	1.05968		40.3109	124.964	0.322579	124.964	0.679794	4.12017	17.0189
Europe	Romania	Danube River	Balica et al., 2020, Earth and Planetary Science Letters, 531, p.116005.	Danube	Danube.Spot 180	44.9229	29.627	529.944	7.52243			487.941	26.6224	529.944			4.29864	147.648	6.78389	1.30064			719.9	2.91333		0.00766527	9.01869	0.0819593	0.90827	2.11076	0.348048	10.8951	4.71522	54.1519	22.317	101.039	22.6603	193.28	51.9304	10837.4	0.841215		67.347	153.3	0.439316	153.3	0.0716407	4.76746	10.9044
Europe	Romania	Danube River	Balica et al., 2020, Earth and Planetary Science Letters, 531, p.116005.	Danube	Danube.Spot 242	44.9229	29.627	531.679	12.5173			453.195	37.0446	531.679			2.32206	362.756	15.6229	1.39839			1839	1.9521		0.005011	1.8939	0.237029	3.11832	6.43054	0.192575	30.848	12.8834	138.996	55.6265	244.19	49.6272	349.201	92.4305	11020.2	0.492008		67.3064	186.607	0.360685	186.607	-3.53304	11.7131	26.5359
Europe	Romania	Danube River	Balica et al., 2020, Earth and Planetary Science Letters, 531, p.116005.	Danube	Danube.Spot 69	44.9229	29.627	535.674	6.29658			760.563	48.6201	535.674			12.8647	612.529	6.71359	1.42625			1430.45	3.56434		10.4982	39.8169	6.27916	19.944	5.66767	0.577259	18.0049	8.06912	96.6655	42.0858	198.073	42.316	327.295	92.1768	10316	0.642794		47.88	123.851	0.386593	123.851	2.84428	19.7781	21.5421
Europe	Romania	Danube River	Balica et al., 2020, Earth and Planetary Science Letters, 531, p.116005.	Danube	Danube.Spot 32	44.9229	29.627	536.415	8.29554			466.763	31.0399	536.415			30.1753	248.765	9.98058	1.17632			1091.9	8.46934		26.355	70.6278	12.3243	37.5013	9.09909	0.464454	23.8633	8.5395	87.9434	34.5773	146.406	29.2297	209.712	55.4292	7576.75	1.28067		30.9048	109.72	0.28167	109.72	3.60036	8.03244	16.92
Europe	Romania	Danube River	Balica et al., 2020, Earth and Planetary Science Letters, 531, p.116005.	Danube	Danube.Spot 248	44.9229	29.627	538.661	10.7368			522.063	23.2863	538.661			7.51585	362.396	6.70694	1.12481			1664.61	10.1967		21.1214	76.4415	14.9448	48.4517	14.9967	1.73417	34.1161	12.3113	129.585	52.4129	223.758	43.2197	301.865	77.5736	7290.63	1.28356		77.7915	192.734	0.403621	192.734	3.5937	11.7015	25.1655
Europe	Romania	Danube River	Balica et al., 2020, Earth and Planetary Science Letters, 531, p.116005.	Danube	Danube.Spot 200	44.9229	29.627	539.435	9.07791			539.915	15.7769	539.435			15.1891	297.099	6.62684	1.13697			2919.37	26.9118		17.4227	77.6454	10.391	34.0262	15.8466	0.280162	55.3897	23.0159	234.786	91.5296	385.348	73.3025	455.189	114.286	8147.84	3.33518		216.242	489.644	0.441632	489.644	2.82182	9.59312	42.4523
Europe	Romania	Danube River	Balica et al., 2020, Earth and Planetary Science Letters, 531, p.116005.	Danube	Danube.Spot 257	44.9229	29.627	539.57	9.38723			534.485	24.1951	539.57			17.2963	395.864	4.40507	1.14396			2715.36	9.5988		11.7047	57.5694	8.88392	32.463	14.1277	1.01178	49.4181	19.9478	221.451	88.0071	367.669	69.3273	458.351	118.215	8067.86	1.35568		102.324	269.313	0.379944	269.313	3.1759	12.7822	39.6957
Europe	Romania	Danube River	Balica et al., 2020, Earth and Planetary Science Letters, 531, p.116005.	Danube	Danube.Spot 33	44.9229	29.627	541.74	8.89839			511.124	22.1677	541.74			2.7872	72.1393	5.88008	1.27539			816.626	1.25746		0.00546383	11.755	0.243873	2.82378	4.27778	1.0996	15.8621	5.69949	59.487	24.3329	113.023	25.6187	227.188	64.1632	12196.4	0.282565		158.541	361.159	0.438978	361.159	-0.0880893	2.32933	12.4835
Europe	Romania	Danube River	Balica et al., 2020, Earth and Planetary Science Letters, 531, p.116005.	Danube	Danube.Spot 92	44.9229	29.627	542.955	13.5983			492.111	21.6828	542.955			1.82402	176.885	2.78468	1.31061			1404.51	2.41571		0.0171903	10.5712	0.201154	2.45708	4.78166	0.893582	22.6674	9.26386	102.945	42.4036	197.417	42.1033	327.615	88.8724	9951.14	0.461168		91.1959	327.709	0.278283	327.709	0.460882	5.71151	20.8533
Europe	Romania	Danube River	Balica et al., 2020, Earth and Planetary Science Letters, 531, p.116005.	Danube	Danube.Spot 184	44.9229	29.627	543.532	14.2178			485.61	30.6241	543.532			3.60457	241.412	12.5082	1.25684			1513.99	2.18739		0.0100945	8.87441	0.124335	1.65801	3.75494	0.486848	20.1876	8.78766	102.024	44.7178	204.498	43.3243	323.139	87.0225	9405.35	0.476363		51.5665	152.265	0.338663	152.265	-0.481646	7.79502	22.0597
Europe	Romania	Danube River	Balica et al., 2020, Earth and Planetary Science Letters, 531, p.116005.	Danube	Danube.Spot 11	44.9229	29.627	545.336	7.25508			565.945	35.3979	545.336			209.596	130.004	10.3914	1.4005			1076.11	1.67857		0.0945284	5.39409	0.114251	1.38323	2.14105	0.650772	10.9967	5.04861	64.034	29.0624	146.082	35.0949	295.641	88.799	8977.78	0.284863		43.2841	142.781	0.303151	142.781	-1.1293	4.19774	16.1411
Europe	Romania	Danube River	Balica et al., 2020, Earth and Planetary Science Letters, 531, p.116005.	Danube	Danube.Spot 56	44.9229	29.627	547.712	8.53956			527.496	41.408	547.712			4.20216	394.477	27.4604	1.52889			2316.14	4.00471		0.03046	9.1362	0.471195	5.00848	8.26203	2.14176	41.7672	16.7825	176.383	71.6052	297.545	60.6823	416.403	113.798	9358.41	0.748864		89.7271	104.578	0.857996	104.578	-0.787693	12.7374	33.3103
Europe	Romania	Danube River	Balica et al., 2020, Earth and Planetary Science Letters, 531, p.116005.	Danube	Danube.Spot 90	44.9229	29.627	553.96	8.22759			522.89	25.908	553.96			5.37097	151.369	9.11387	1.44254			2399.64	2.63902		0.022286	3.82936	0.450563	5.85376	10.3357	2.64761	47.1879	18.4335	193.711	77.1552	319.286	65.3977	439.796	121.24	7239.13	0.522462		92.6983	180.907	0.512407	180.907	-1.81576	4.8876	34.7551
Europe	Romania	Danube River	Balica et al., 2020, Earth and Planetary Science Letters, 531, p.116005.	Danube	Danube.Spot 262	44.9229	29.627	557.448	9.91158			607.238	59.1775	557.448			268.644	80.5648	23.279	1.15667			429.011	7.67704		0.00551123	5.62681	0.0537586	0.468673	0.923916	0.203966	6.22009	3.14771	34.9011	13.1744	61.4375	14.382	137.833	35.0726	13248.2	3.61618		63.2234	447.816	0.141182	447.816	-2.74856	2.60138	6.68017
Europe	Romania	Danube River	Balica et al., 2020, Earth and Planetary Science Letters, 531, p.116005.	Danube	Danube.Spot 161	44.9229	29.627	562.635	7.73615			569.436	24.585	562.635			1.80559	118.991	17.6153	1.30892			597.259	2.53649		0.00892974	7.82399	0.187604	2.1754	3.56693	0.732363	14.2614	5.21495	52.0809	19.8086	83.515	16.8164	132.003	33.1694	8411.08	0.495624		31.8451	79.2745	0.401707	79.2745	-0.430975	3.84215	8.93417
Europe	Romania	Danube River	Balica et al., 2020, Earth and Planetary Science Letters, 531, p.116005.	Danube	Danube.Spot 16	44.9229	29.627	562.755	10.277			585.36	35.921	562.755			102.626	2847.13	20.6696	1.26305			1120.15	3.47082		11.8073	65.5079	16.461	62.7655	15.7676	2.33684	31.4063	9.79269	94.7255	36.1356	150.72	29.9994	216.783	61.2202	8180.95	0.802909		62.5166	194.783	0.320955	194.783	2.33938	91.9318	17.5691
Europe	Romania	Danube River	Balica et al., 2020, Earth and Planetary Science Letters, 531, p.116005.	Danube	Danube.Spot 79	44.9229	29.627	563.137	10.4781			512.608	25.6394	563.137			99.7654	717.804	11.6988	1.59597			2878.03	4.44143		0.0471111	14.9209	0.2679	2.8515	5.8077	0.514574	31.5944	16.4105	203.891	86.7842	401.66	85.3819	575.764	155.373	11397.4	0.99043		283.653	300.082	0.945252	300.082	-0.110384	23.1774	41.7498
Europe	Romania	Danube River	Balica et al., 2020, Earth and Planetary Science Letters, 531, p.116005.	Danube	Danube.Spot 25	44.9229	29.627	566.568	5.04783			523.831	39.6473	566.568			65.8887	118.173	6.80433	1.44521			934.151	5.43616		0.268678	13.0548	0.264842	2.4907	3.51217	1.12522	17.681	6.94642	75.944	31.3691	138.071	28.0517	208.919	57.11	8527.86	0.769725		60.3804	123.609	0.488478	123.609	0.898099	3.81571	13.9913
Europe	Romania	Danube River	Balica et al., 2020, Earth and Planetary Science Letters, 531, p.116005.	Danube	Danube.Spot 226	44.9229	29.627	569.137	11.1816			584.9	26.495	569.137			166.835	54.541	4.21871	1.10314			389.475	0.944005		0.0322414	3.85782	0.0840824	0.715209	0.933078	0.429113	4.06201	1.93755	25.2161	11.258	62.4519	15.6796	156.702	46.663	8969.44	0.272827		140.886	184.837	0.762217	184.837	-1.15285	1.76109	6.32291
Europe	Romania	Danube River	Balica et al., 2020, Earth and Planetary Science Letters, 531, p.116005.	Danube	Danube.Spot 144	44.9229	29.627	572.31	7.50415			570.789	36.7211	572.31			8.27416	173.104	16.9676	1.22976			949.534	7.63517		0.0414452	56.7107	0.339338	3.49628	4.7057	1.07296	17.5179	6.80286	72.076	27.8512	124.437	26.0162	199.777	50.4578	9422.45	1.37139		159.469	89.2245	1.78727	89.2245	2.93813	5.5894	14.2579
Europe	Romania	Danube River	Balica et al., 2020, Earth and Planetary Science Letters, 531, p.116005.	Danube	Danube.Spot 253	44.9229	29.627	574.639	7.62031			531.276	34.14	574.639			5.4307	87.6248	16.5172	1.2021			363.782	4.30187		0.839728	31.0402	0.498579	2.54911	2.56924	0.436321	9.1847	3.39625	32.8029	11.6916	47.6318	9.83514	88.1112	18.3161	10256.9	0.726361		127.668	87.9799	1.45111	87.9799	1.92724	2.82935	5.66996
Europe	Romania	Danube River	Balica et al., 2020, Earth and Planetary Science Letters, 531, p.116005.	Danube	Danube.Spot 162	44.9229	29.627	579.947	10.6123			557.937	24.3279	579.947			8.75392	195.436	9.52628	1.46172			627.565	1.75172		0.00544905	15.9454	0.0910115	1.21793	2.2722	0.227742	9.2718	4.00365	45.7435	19.7217	93.0518	21.5962	188.471	45.4027	11565.1	0.346238		90.2184	216.47	0.416771	216.47	0.466808	6.31051	9.71632
Europe	Romania	Danube River	Balica et al., 2020, Earth and Planetary Science Letters, 531, p.116005.	Danube	Danube.Spot 232	44.9229	29.627	580.664	10.1986			583.768	16.0171	580.664			11.2694	436.825	5.69131	1.42721			1671.13	5.77762		0.00139994	2.89118	0.025038	0.458125	1.52014	0.0674505	12.335	7.15869	106.688	46.754	233.613	51.1837	381.222	98.3879	12606.2	2.05566		39.2344	413.064	0.0949838	413.064	-2.61171	14.1048	24.3599
Europe	Romania	Danube River	Balica et al., 2020, Earth and Planetary Science Letters, 531, p.116005.	Danube	Danube.Spot 233	44.9229	29.627	583.576	167.42			1005.5	27.382	583.576			499.235	88.4726	309.114	0.0749816			1159.26	873.03		196.959	1041.53	217.878	591.088	140.559	27.4834	157.763	32.2682	164.386	38.2914	107.377	13.6691	64.1195	16.9679	26.4025	30.7212		609.597	147.759	4.12563	147.759	5.03396	2.85672	32.293
Europe	Romania	Danube River	Balica et al., 2020, Earth and Planetary Science Letters, 531, p.116005.	Danube	Danube.Spot 0	44.9229	29.627	587.125	11.3166			510.06	32.5761	587.125			214.908	697.884	16.3778	1.6213			2755.03	2.82732		0.112105	2.46958	0.454847	5.19169	9.3413	0.442721	44.9265	19.6405	217.844	86.3291	368.139	73.8534	485.835	133.964	9637.16	0.530986		89.6459	218.759	0.409793	218.759	-3.25118	22.5342	39.5961
Europe	Romania	Danube River	Balica et al., 2020, Earth and Planetary Science Letters, 531, p.116005.	Danube	Danube.Spot 136	44.9229	29.627	588.23	10.6047			697.591	38.5403	588.23			181.058	183.436	18.1836	1.1784			1120.48	3.00282		0.0457561	16.5796	0.497247	4.64566	5.89549	0.895536	22.2842	8.92709	88.9572	34.0491	142.027	29.1721	220.282	53.4992	9128.45	0.67675		78.3897	75.3695	1.04007	75.3695	0.889242	5.92301	16.355
Europe	Romania	Danube River	Balica et al., 2020, Earth and Planetary Science Letters, 531, p.116005.	Danube	Danube.Spot 216	44.9229	29.627	592.273	8.81931			727.681	35.2534	592.273			170.597	991.481	10.4943	1.19446			2463.42	7.09015		87.5339	265.962	56.8485	181.756	42.4387	2.07714	75.4518	22.9108	213.696	77.8014	306.429	57.8316	380.891	97.9866	8612	0.987964		76.8327	153.36	0.500996	153.36	5.5683	32.0142	39.5433
Europe	Romania	Danube River	Balica et al., 2020, Earth and Planetary Science Letters, 531, p.116005.	Danube	Danube.Spot 133	44.9229	29.627	596.998	11.4834			616.531	18.7143	596.998			66.8577	446.425	10.5344	1.2137			1068.98	8.48159		3.47559	31.1832	2.85939	11.0184	6.55761	0.761395	21.4652	8.00858	82.7423	31.5904	135.93	28.8094	224.25	57.1502	9636.97	1.75747		172.688	287.376	0.600913	287.376	1.29805	14.4148	15.9102
Europe	Romania	Danube River	Balica et al., 2020, Earth and Planetary Science Letters, 531, p.116005.	Danube	Danube.Spot 243	44.9229	29.627	598.736	9.74927			656.233	18.538	598.736			35.9659	96.6784	4.4606	1.18527			883.206	24.1095		0.0324442	25.8118	0.10616	1.03658	2.62136	0.384494	15.0193	6.46568	69.5239	27.1059	115.796	24.0822	192.34	44.9826	13287.6	5.615		335.635	989.78	0.3391	989.78	0.642228	3.12168	13.0785
Europe	Romania	Danube River	Balica et al., 2020, Earth and Planetary Science Letters, 531, p.116005.	Danube	Danube.Spot 265	44.9229	29.627	599.253	23.3421			694.501	19.3386	599.253			319.71	656.926	0.620558	1.2511			1255.59	13.7678		5.24956	57.7155	2.78585	8.37719	4.37747	1.25302	16.9757	6.39063	73.509	32.9888	169.24	42.0158	362.538	112.387	11405.5	2.80983		334.881	589.736	0.567849	589.736	4.20133	21.2117	19.4861
Europe	Romania	Danube River	Balica et al., 2020, Earth and Planetary Science Letters, 531, p.116005.	Danube	Danube.Spot 111	44.9229	29.627	604.157	8.88861			581.199	30.415	604.157			0.50224	144.184	6.37866	1.2784			653.612	2.20787		0.539763	12.3868	0.368279	2.25491	2.49407	0.803799	10.0622	4.02167	44.4508	18.4226	87.9897	20.6135	188.895	53.8109	11009.5	0.535044		69.1368	101.345	0.682191	101.345	1.03539	4.6556	10.0059
Europe	Romania	Danube River	Balica et al., 2020, Earth and Planetary Science Letters, 531, p.116005.	Danube	Danube.Spot 8	44.9229	29.627	604.752	6.92116			378.354	142.316	604.752			4.29894	108.991	11.5161	1.46016			661.96	1.95678		0.00520737	14.0753	0.174384	2.04231	3.41146	1.04081	13.0476	4.81149	50.0948	19.6773	86.2813	17.6375	145.929	36.5452	9787.11	0.446483		34.295	51.5393	0.665415	51.5393	1.33141	3.51925	9.8044
Europe	Romania	Danube River	Balica et al., 2020, Earth and Planetary Science Letters, 531, p.116005.	Danube	Danube.Spot 164	44.9229	29.627	606.531	10.9587			582.544	26.8613	606.531			51.6163	1468.79	6.62543	1.29059			962.89	7.57928		25.0783	88.8739	18.2043	57.5291	13.2796	0.289818	22.9935	7.57094	76.8086	30.7387	132.089	27.4009	211.647	52.1531	10933.7	1.59427		65.1084	209.017	0.311498	209.017	3.79555	47.4262	15.5898
Europe	Romania	Danube River	Balica et al., 2020, Earth and Planetary Science Letters, 531, p.116005.	Danube	Danube.Spot 117	44.9229	29.627	607.036	17.2168			622.848	29.8462	607.036			12.2865	110.995	4.69948	1.35566			746.025	3.16232		0.0582879	26.4471	0.949053	8.56782	9.09745	3.67111	25.8032	7.74537	67.051	23.4254	94.771	19.1524	160.452	39.6723	11097	0.380253		105.505	173.117	0.609441	173.117	2.1528	3.58394	11.3327
Europe	Romania	Danube River	Balica et al., 2020, Earth and Planetary Science Letters, 531, p.116005.	Danube	Danube.Spot 212	44.9229	29.627	610.671	10.4821			558.88	22.5039	610.671			0.35908	112.819	11.2048	1.26213			689.507	13.57		0.00519908	65.438	0.133701	1.65106	2.92664	0.654333	12.1102	5.00043	54.2996	20.9384	95.9555	20.9172	168.422	41.7844	10264.2	2.60734		175.143	203.819	0.859307	203.819	2.82975	3.64284	10.738
Europe	Romania	Danube River	Balica et al., 2020, Earth and Planetary Science Letters, 531, p.116005.	Danube	Danube.Spot 86	44.9229	29.627	611.785	11.252			602.698	22.8726	611.785			1.85908	177.019	14.4493	1.38029			780.826	3.83194		0.00919986	10.37	0.195556	1.99526	2.56069	0.816586	9.95947	4.09468	50.115	22.3477	116.081	28.5948	247.645	73.2329	9335.27	0.897228		72.9005	144.659	0.503946	144.659	-0.291974	5.71582	12.1402
Europe	Romania	Danube River	Balica et al., 2020, Earth and Planetary Science Letters, 531, p.116005.	Danube	Danube.Spot 256	44.9229	29.627	616.47	15.5863			568.103	26.4221	616.47			2.80017	211.707	3.04125	1.30574			1894.73	35.8379		3.23646	34.8782	2.23438	8.81489	6.05506	0.601986	29.2938	12.1629	139.814	59.4261	253.902	52.7082	369.13	96.9573	9466.37	4.04579		152.801	243.446	0.62766	243.446	2.71509	6.83588	27.7063
Europe	Romania	Danube River	Balica et al., 2020, Earth and Planetary Science Letters, 531, p.116005.	Danube	Danube.Spot 175	44.9229	29.627	620.095	11.0402			622.041	22.7188	620.095			26.9479	264.229	4.09633	1.16299			486.686	5.38142		1.20731	16.434	1.00518	4.09193	2.05876	0.599162	6.11508	2.65014	30.4756	13.9215	71.8605	18.2688	175.6	51.7071	12247.3	1.5624		180.074	504.35	0.357043	504.35	0.517599	8.53178	7.82879
Europe	Romania	Danube River	Balica et al., 2020, Earth and Planetary Science Letters, 531, p.116005.	Danube	Danube.Spot 94	44.9229	29.627	629.717	8.79059			571.419	35.7109	629.717			8.97937	32.7464	2.76144	1.21395			117.416	0.696425		0.00797905	1.71132	0.00778018	0.129541	0.232077	0.123165	1.20811	0.609392	7.46742	3.3667	17.5408	4.33372	56.6309	13.1544	8358.86	0.108646		35.1935	141.892	0.24803	141.892	-1.96674	1.05736	1.94706
Europe	Romania	Danube River	Balica et al., 2020, Earth and Planetary Science Letters, 531, p.116005.	Danube	Danube.Spot 27	44.9229	29.627	630.401	10.073			602.111	25.9139	630.401			141.453	164.559	17.1086	1.2467			264.649	2.65169		0.00627697	2.58048	0.203584	2.49941	5.00657	0.146263	18.8888	5.28047	32.7547	7.90697	20.209	2.73341	36.6839	2.49723	11338.1	0.467946		66.7249	163.572	0.407925	163.572	-2.96042	5.31351	3.81443
Europe	Romania	Danube River	Balica et al., 2020, Earth and Planetary Science Letters, 531, p.116005.	Danube	Danube.Spot 23	44.9229	29.627	634.701	21.9967			631.785	24.9473	634.701			3.74021	58.8537	9.34979	1.26083			341.176	5.46208		0.0037457	42.3942	0.0817506	1.0257	1.63105	0.39656	5.99	2.5106	25.7496	10.4304	46.4739	10.477	100.401	22.0087	10332.7	0.987311		195.458	206.607	0.946037	206.607	2.22136	1.90035	5.48272
Europe	Romania	Danube River	Balica et al., 2020, Earth and Planetary Science Letters, 531, p.116005.	Danube	Danube.Spot 192	44.9229	29.627	642.823	8.44873			651.65	22.3109	642.823			1.86249	91.2788	11.935	1.14122			1535.61	4.5634		0.0794989	6.23812	0.971565	9.58127	11.5582	1.27086	41.0824	14.1026	131.557	48.9614	191.847	36.0385	254.661	66.5351	7646.29	0.849262		51.3049	101.324	0.506347	101.324	-0.699358	2.94733	22.145
Europe	Romania	Danube River	Balica et al., 2020, Earth and Planetary Science Letters, 531, p.116005.	Danube	Danube.Spot 201	44.9229	29.627	643.046	10.0296			561.468	27.5862	643.046			2.81074	181.584	11.3035	1.34135			1558.85	3.67851		0.027025	3.17698	0.221336	2.82241	5.49862	0.475808	26.156	10.717	116.558	46.4744	197.527	39.9816	286.753	75.479	9355.07	0.622688		24.5923	100.114	0.245644	100.114	-1.81331	5.86321	22.3567
Europe	Romania	Danube River	Balica et al., 2020, Earth and Planetary Science Letters, 531, p.116005.	Danube	Danube.Spot 67	44.9229	29.627	643.063	8.78225			625.705	16.6178	643.063			2.0376	82.2709	4.54838	1.22031			1549.05	23.6153		0.00863941	24.4938	0.218798	3.1223	5.62755	0.0296509	26.6555	11.5238	125.672	48.7973	209.287	40.9	280.397	70.4356	9446.11	3.52272		241.503	410.596	0.588177	410.596	1.29817	2.65647	22.4871
Europe	Romania	Danube River	Balica et al., 2020, Earth and Planetary Science Letters, 531, p.116005.	Danube	Danube.Spot 223	44.9229	29.627	660.239	17.7813			780.253	100.288	660.239			232.576	158.352	5.05368	1.12698			838.118	5.25324		0.633805	15.5157	0.90254	4.68544	4.21995	0.347246	16.6367	6.41054	66.7147	26.356	114.233	22.9083	176.738	42.752	10726	1.08796		193.606	232.817	0.831581	232.817	0.906532	5.11307	12.4124
Europe	Romania	Danube River	Balica et al., 2020, Earth and Planetary Science Letters, 531, p.116005.	Danube	Danube.Spot 75	44.9229	29.627	664.243	12.3094			704.235	16.5004	664.243			0.422054	154.889	4.00811	1.18634			1286.82	13.4005		0.00422483	15.9106	0.129711	1.44262	2.87931	0.319709	14.9096	6.97609	87.1688	36.0943	171.863	38.4997	300.686	80.6157	10312	3.91252		206.576	553.997	0.372884	553.997	0.398795	5.00127	18.9676
Europe	Romania	Danube River	Balica et al., 2020, Earth and Planetary Science Letters, 531, p.116005.	Danube	Danube.Spot 241	44.9229	29.627	664.448	9.08845			653.79	19.0396	664.448			0.253643	314.654	10.2304	1.34677			1206.29	6.54362		0.00808631	11.3821	0.0852642	0.867838	1.87568	0.38425	11.1656	5.87722	75.2244	33.3985	168.347	39.498	316.466	89.034	9963.44	1.47486		128.959	417.726	0.308717	417.726	-0.751165	10.16	18.0225
Europe	Romania	Danube River	Balica et al., 2020, Earth and Planetary Science Letters, 531, p.116005.	Danube	Danube.Spot 227	44.9229	29.627	677.403	10.5393			725.762	15.8028	677.403			22.4818	117.046	4.80313	1.1355			1153.66	56.731		0.0259867	17.7998	0.188289	1.92102	3.30128	0.0954111	15.4713	7.12918	83.8527	35.7712	165.727	36.7475	276.393	75.1741	10068	19.6013		159.108	485.077	0.328005	485.077	0.551862	3.77934	17.2521
Europe	Romania	Danube River	Balica et al., 2020, Earth and Planetary Science Letters, 531, p.116005.	Danube	Danube.Spot 206	44.9229	29.627	680.065	7.43955			724.549	22.5611	680.065			0.00621681	64.9327	18.4988	1.13035			587.551	10.856		0.071066	11.5085	0.372903	3.19015	3.3595	1.27235	10.212	4.34277	48.0407	19.9205	93.1151	21.7841	183.163	46.38	7128.26	2.80843		165.111	118.634	1.39177	118.634	-0.153418	2.09663	9.26466
Europe	Romania	Danube River	Balica et al., 2020, Earth and Planetary Science Letters, 531, p.116005.	Danube	Danube.Spot 128	44.9229	29.627	682.705	8.51994			667.394	32.9375	682.705			12.9548	98.0218	5.35752	1.20151			743.323	5.79105		0.80679	35.154	0.266336	1.17033	1.52971	0.555269	7.95147	3.75246	48.2578	21.5518	109.385	24.8836	207.419	60.4879	9995.57	1.0701		100.455	133.766	0.750975	133.766	2.75704	3.16506	11.4888
Europe	Romania	Danube River	Balica et al., 2020, Earth and Planetary Science Letters, 531, p.116005.	Danube	Danube.Spot 49	44.9229	29.627	696.785	16.7356			649.842	23.3654	696.785			89.64	467.54	11.401	1.62225			1490.64	4.07673		0.0113762	3.2796	0.347086	4.57043	9.77953	0.110268	39.3448	15.1446	133.395	44.1925	164.875	31.2494	224.628	48.922	11569.4	0.715939		147.033	265.462	0.553875	265.462	-2.61216	15.0965	21.0731
Europe	Romania	Danube River	Balica et al., 2020, Earth and Planetary Science Letters, 531, p.116005.	Danube	Danube.Spot 203	44.9229	29.627	698.293	11.5417			715.798	18.5427	698.293			10.6016	174.606	8.65453	1.30844			1633.92	2.1635		0.256507	5.0793	0.34904	2.90588	5.07711	0.426313	26.5446	11.1672	124.659	50.3496	218.689	43.9258	300.763	81.3952	10469.5	0.388489		78.9258	362.408	0.217782	362.408	-1.88358	5.63791	23.5579
Europe	Romania	Danube River	Balica et al., 2020, Earth and Planetary Science Letters, 531, p.116005.	Danube	Danube.Spot 189	44.9229	29.627	698.769	17.2682			740.763	17.9052	698.769			17.179	141.96	11.8473	1.21679			1767.35	4.01647		0.347674	16.6136	1.17273	7.6715	9.12838	0.865055	35.0076	13.8053	137.846	54.3933	232.777	45.9717	303.297	81.7473	9815.76	0.633881		280.599	268.553	1.04486	268.553	0.161613	4.5838	25.4996
Europe	Romania	Danube River	Balica et al., 2020, Earth and Planetary Science Letters, 531, p.116005.	Danube	Danube.Spot 76	44.9229	29.627	701.424	16.0102			713.071	28.7899	701.424			1.3171	85.0548	1.75882	1.26505			480.177	4.07795		0.00135298	8.84283	0.0120232	0.265067	0.501907	0.175338	3.83578	2.05901	29.3137	13.8521	77.2816	19.0948	191.202	52.7925	12214	1.58518		60.209	201.271	0.299144	201.271	0.973017	2.74636	7.75383
Europe	Romania	Danube River	Balica et al., 2020, Earth and Planetary Science Letters, 531, p.116005.	Danube	Danube.Spot 48	44.9229	29.627	722.091	10.3372			721.377	14.6645	722.091			10.6853	195.061	6.61271	1.51649			610.705	2.15992		0.00330855	1.17346	0.103607	1.63049	6.49609	0.427163	33.1068	10.456	69.8413	18.847	54.6746	8.28996	74.8506	12.0151	13463.5	0.625559		37.3817	741.402	0.0504202	741.402	-4.81545	6.29839	8.63333
Europe	Romania	Danube River	Balica et al., 2020, Earth and Planetary Science Letters, 531, p.116005.	Danube	Danube.Spot 261	44.9229	29.627	736.603	26.8433			813.362	19.8782	736.603			63.8873	135.345	7.66651	1.2874			522.601	2.48421		0.0242742	13.336	0.0648579	0.676949	0.944768	0.297098	43.5333	2.47173	32.7138	15.5353	81.7251	22.0019	199.651	53.7129	10218.7	0.561246		611.628	789.009	0.775185	789.009	-0.777723	4.37021	8.6542
Europe	Romania	Danube River	Balica et al., 2020, Earth and Planetary Science Letters, 531, p.116005.	Danube	Danube.Spot 43	44.9229	29.627	745.466	17.045			784.258	29.4301	745.466			35.3212	525.351	11.0504	1.23874			2542.68	3.42607		0.0296509	3.33471	0.289377	3.02456	6.48232	0.745306	36.1453	16.8207	190.881	76.2648	314.486	66.9357	430.327	110.607	10149.3	0.672548		66.3471	165.777	0.400219	165.777	-2.14736	16.9632	36.0635
Europe	Romania	Danube River	Balica et al., 2020, Earth and Planetary Science Letters, 531, p.116005.	Danube	Danube.Spot 125	44.9229	29.627	778.35	12.2295			806.096	23.9711	778.35			0.108099	222.641	30.728	1.2928			2221.93	1.7066		0.0487765	16.3854	0.664624	6.96842	9.92602	1.09003	40.5196	15.8419	163.528	63.988	274.958	54.3364	373.952	97.1006	10475.8	0.410222		84.1241	126.847	0.663193	126.847	-0.0386357	7.18894	31.6691
Europe	Romania	Danube River	Balica et al., 2020, Earth and Planetary Science Letters, 531, p.116005.	Danube	Danube.Spot 77	44.9229	29.627	792.742	13.5856			843.596	21.1582	792.742			34.207	348.456	6.58184	1.92729			1977.21	3.63199		0.0261532	3.26638	0.427408	5.08098	9.8082	0.744833	45.289	17.685	171.066	62.1076	255.371	48.8708	339.227	87.3132	11261.5	0.691926		138.931	344.651	0.403107	344.651	-2.36886	11.2514	28.4757
Europe	Romania	Danube River	Balica et al., 2020, Earth and Planetary Science Letters, 531, p.116005.	Danube	Danube.Spot 181	44.9229	29.627	810.481	10.3435			825.533	25.3759	810.481			2.88458	107.272	16.5619	1.20187			788.749	1.10773		0.00468196	5.57509	0.133623	1.76499	3.27146	0.627352	15.1986	5.87132	64.3745	25.6064	112.375	24.1226	186.494	46.9411	10019.7	0.174932		34.9945	61.5807	0.56827	61.5807	-0.746586	3.46375	11.7963
Europe	Romania	Danube River	Balica et al., 2020, Earth and Planetary Science Letters, 531, p.116005.	Danube	Danube.Spot 258	44.9229	29.627	814.959	24.265			789.716	28.3655	814.959			52.9362	582.547	20.4257	1.57268			2265.04	3.71459		0.0127939	1.40338	0.157582	1.93692	4.24167	0.189364	24.3921	12.1783	153.417	68.746	330.605	71.2848	508.979	146.454	11058.9	0.838001		58.281	178.902	0.325771	178.902	-4.24961	18.81	33.3008
Europe	Romania	Danube River	Balica et al., 2020, Earth and Planetary Science Letters, 531, p.116005.	Danube	Danube.Spot 13	44.9229	29.627	871.777	22.4751			913.24	24.3731	913.24			84.0732	864.231	4.65703	1.84432			2824.21	2.00954		0.247233	0.96826	0.192832	1.43762	4.03043	0.0801312	28.6265	16.2704	198.875	83.1512	375.889	77.8414	559.763	147.805	12322.9	0.900863		40.4345	443.964	0.091076	443.964	-4.3996	27.9054	40.6143
Europe	Romania	Danube River	Balica et al., 2020, Earth and Planetary Science Letters, 531, p.116005.	Danube	Danube.Spot 109	44.9229	29.627	949.589	21.6102			928.953	24.8344	928.953			27.2241	680.001	8.87714	1.52013			2769.89	5.33098		0.00971747	1.51827	0.15466	1.7866	5.04881	0.312979	32.3359	16.8191	197.849	85.5774	381.047	81.4163	534.453	148.523	12748.8	1.17087		50.7836	169.367	0.299843	169.367	-3.34199	21.9568	39.9612
Europe	Romania	Danube River	Balica et al., 2020, Earth and Planetary Science Letters, 531, p.116005.	Danube	Danube.Spot 36	44.9229	29.627	918.332	16.8751			933.992	13.8569	933.992			1.99673	133.275	7.25132	1.08034			1291.42	27.7999		0.00310247	16.6158	0.0615306	0.999236	2.37851	0.0938762	13.5743	6.84585	83.2142	36.2867	170.292	36.2942	276.927	65.4615	13341.2	6.26093		137.561	633.088	0.217286	633.088	-0.156456	4.30336	18.7372
Europe	Romania	Danube River	Balica et al., 2020, Earth and Planetary Science Letters, 531, p.116005.	Danube	Danube.Spot 204	44.9229	29.627	945.795	14.1938			944.231	30.0636	944.231			2.78663	141.292	19.9633	1.14659			1267.32	5.49067		0.00964075	6.1715	0.313657	3.61419	6.03611	0.479261	25.9229	10.1486	98.3004	36.9593	150	29.1645	205.195	48.564	9881.67	0.882303		24.2026	56.2498	0.43027	56.2498	-0.653675	4.56221	17.9602
Europe	Romania	Danube River	Balica et al., 2020, Earth and Planetary Science Letters, 531, p.116005.	Danube	Danube.Spot 240	44.9229	29.627	865.273	22.6607			958.127	44.1953	958.127			4.32723	76.6747	3.04199	1.37435			347.891	15.1719		0.0042447	2.18163	0.0204458	0.283876	0.660092	0.132135	3.18755	1.74873	23.046	10.111	52.2298	14.3514	151.483	45.7193	12011.1	9.25516		13.5959	156.911	0.0866472	156.911	-1.7165	2.47577	5.7042
Europe	Romania	Danube River	Balica et al., 2020, Earth and Planetary Science Letters, 531, p.116005.	Danube	Danube.Spot 114	44.9229	29.627	942.978	11.9608			978.731	39.6022	978.731			64.0038	391.036	32.5937	1.25617			748.694	6.43223		5.51607	33.4525	2.88216	9.12077	3.49189	0.633759	11.5864	4.86743	57.4707	23.6284	109.321	23.6053	195.704	51.2179	10129.1	1.08616		45.6903	89.9891	0.507731	89.9891	1.44748	12.6263	11.629
Europe	Romania	Danube River	Balica et al., 2020, Earth and Planetary Science Letters, 531, p.116005.	Danube	Danube.Spot 147	44.9229	29.627	918.97	9.86604			982	22.8754	982			3.0032	94.9655	7.62953	1.259			571.059	2.27878		0.0150032	16.0615	0.403039	3.82512	3.75792	1.42626	11.8724	4.29223	42.7373	16.377	78.7765	19.13	181.769	53.6543	9976.2	0.907128		54.5799	92.4037	0.590668	92.4037	1.41121	3.06637	9.00773
Europe	Romania	Danube River	Balica et al., 2020, Earth and Planetary Science Letters, 531, p.116005.	Danube	Danube.Spot 174	44.9229	29.627	966.024	13.694			986.409	31.6573	986.409			8.47943	101.424	9.8243	1.25817			656.015	1.90095		0.0205797	17.5021	0.368801	3.35597	3.62683	1.30204	13.5446	4.91199	50.9781	20.5193	95.2969	21.3064	179.925	50.6087	8955.25	0.338176		135.197	87.5668	1.54393	87.5668	1.38753	3.27492	10.1424
Europe	Romania	Danube River	Balica et al., 2020, Earth and Planetary Science Letters, 531, p.116005.	Danube	Danube.Spot 118	44.9229	29.627	991.015	20.5279			992.269	16.9376	992.269			3.17951	143.908	6.45191	1.18534			551.003	5.95165		0.0481485	12.367	0.322906	2.14975	2.31209	0.23251	9.4476	3.85193	42.8887	17.7131	82.5693	18.4229	154.126	37.2297	11066.6	1.06819		77.9839	195.076	0.399761	195.076	0.454188	4.6467	8.48212
Europe	Romania	Danube River	Balica et al., 2020, Earth and Planetary Science Letters, 531, p.116005.	Danube	Danube.Spot 239	44.9229	29.627	1047.46	16.536			1012.77	12.8333	1012.77			1.8366	95.681	4.41918	1.10718			898.537	20.3729		0.00551073	17.3136	0.092779	1.18043	2.20805	0.100792	11.0107	5.21908	61.7267	26.8449	130.124	30.5451	248.491	62.6456	11943.4	3.93872		99.7649	355.538	0.280602	355.538	0.845812	3.08947	13.6527
Europe	Romania	Danube River	Balica et al., 2020, Earth and Planetary Science Letters, 531, p.116005.	Danube	Danube.Spot 132	44.9229	29.627	996.889	12.4449			1029.93	36.9287	1029.93			21.2382	239.217	36.4394	1.24742			472.992	3.94297		3.72904	41.661	2.10443	7.07174	3.75303	0.943058	11.7957	4.32986	41.4293	15.0936	64.2946	12.9595	110.537	25.4681	8776.37	0.601842		35.344	40.4758	0.873215	40.4758	2.42531	7.72414	7.43371
Europe	Romania	Danube River	Balica et al., 2020, Earth and Planetary Science Letters, 531, p.116005.	Danube	Danube.Spot 55	44.9229	29.627	1082.5	19.0355			1033.54	18.5959	1033.54			7.91892	201.787	5.09545	1.49223			645.497	2.52847		0.00351546	3.10638	0.0287111	0.435668	1.35614	0.567472	8.66129	4.22963	48.3235	17.6045	71.2451	12.8993	108.077	22.0495	12098.4	0.759464		12.43	343.429	0.0361938	343.429	-2.23076	6.51558	9.0375
Europe	Romania	Danube River	Balica et al., 2020, Earth and Planetary Science Letters, 531, p.116005.	Danube	Danube.Spot 110	44.9229	29.627	1018	32.2979			1045.96	17.3435	1045.96			3.0025	108.647	2.99648	1.22096			757.772	9.95611		0.00586114	10.5832	0.116716	1.19789	2.18342	0.0940251	9.85157	4.72364	54.3381	22.9904	107.614	23.5487	188.904	47.8717	10441.2	1.85174		53.9516	146.562	0.368114	146.562	1.09779	3.50815	11.3374
Europe	Romania	Danube River	Balica et al., 2020, Earth and Planetary Science Letters, 531, p.116005.	Danube	Danube.Spot 150	44.9229	29.627	1008.11	11.2436			1049.55	20.623	1049.55			2.77069	127.074	4.10818	1.16499			624.208	5.6184		0.0126963	10.5995	0.10306	1.31224	2.25543	0.275676	11.4033	4.55614	49.8014	20.2645	89.5271	17.5952	142.338	34.9696	9606.76	0.992571		38.0461	78.2523	0.486197	78.2523	1.37131	4.10313	9.31579
Europe	Romania	Danube River	Balica et al., 2020, Earth and Planetary Science Letters, 531, p.116005.	Danube	Danube.Spot 72	44.9229	29.627	1084.68	22.5276			1054.04	20.489	1054.04			2.99895	177.976	19.6045	1.18296			867.235	7.8113		0.00505763	28.6518	0.122445	1.42581	2.78128	0.407799	12.604	5.45377	64.8116	26.4341	121.55	27.0071	218.301	56.8006	10294.3	1.60219		84.3852	149.41	0.564789	149.41	1.17969	5.74671	13.1374
Europe	Romania	Danube River	Balica et al., 2020, Earth and Planetary Science Letters, 531, p.116005.	Danube	Danube.Spot 46	44.9229	29.627	975.761	13.7071			1054.09	29.7956	1054.09			205.847	451.622	56.5231	1.22007			1282.88	1.82682		0.893318	14.6446	1.06946	6.37701	6.61485	0.954171	25.9002	10.3235	104.146	42.1693	171.745	34.0553	249.8	61.7581	9317.11	0.387658		75.9779	78.8428	0.963663	78.8428	-0.349951	14.5826	18.794
Europe	Romania	Danube River	Balica et al., 2020, Earth and Planetary Science Letters, 531, p.116005.	Danube	Danube.Spot 148	44.9229	29.627	1032.87	21.6332			1059.04	17.3607	1059.04			1.00741	144.898	12.234	1.1526			791.882	6.54412		0.00307667	14.3505	0.0706391	1.1504	2.31286	0.190205	11.4142	5.23482	63.1615	25.8259	119.463	25.5458	206.984	51.062	10964.6	1.55582		82.5598	223.492	0.369408	223.492	0.0389301	4.67865	12.0388
Europe	Romania	Danube River	Balica et al., 2020, Earth and Planetary Science Letters, 531, p.116005.	Danube	Danube.Spot 145	44.9229	29.627	957.306	10.7959			1060.36	22.0609	1060.36			0.634716	187.633	28.007	1.21277			1673.74	3.5058		0.0784173	26.1339	1.21169	11.0084	12.4924	2.59226	41.6781	15.0088	139.847	50.7167	196.615	37.8586	264.215	67.3149	9298.45	0.645884		100.369	102.418	0.979995	102.418	1.03815	6.05856	24.0374
Europe	Romania	Danube River	Balica et al., 2020, Earth and Planetary Science Letters, 531, p.116005.	Danube	Danube.Spot 63	44.9229	29.627	1140.36	16.2551			1094.67	15.607	1094.67			4.1323	212.115	15.3308	1.1387			2189.45	12.7369		0.0139801	11.8236	0.402991	4.94325	8.9353	0.510963	40.3743	16.1465	174.459	66.2544	285.07	54.3546	365.419	91.5921	10053.5	2.29476		144.182	283.894	0.507873	283.894	-0.700954	6.84905	31.3064
Europe	Romania	Danube River	Balica et al., 2020, Earth and Planetary Science Letters, 531, p.116005.	Danube	Danube.Spot 139	44.9229	29.627	1133.68	25.6221			1104.16	18.7999	1104.16			7.74338	164.397	24.4773	1.16178			834.898	6.47628		0.00591707	9.97088	0.124491	1.23337	2.35776	0.227371	11.7279	5.5602	63.4402	26.3022	113.4	25.3471	194.387	47.1629	10344.1	1.36849		75.6114	164.131	0.460676	164.131	-0.92737	5.30827	12.3691
Europe	Romania	Danube River	Balica et al., 2020, Earth and Planetary Science Letters, 531, p.116005.	Danube	Danube.Spot 123	44.9229	29.627	1026.18	13.2811			1121.83	29.9287	1121.83			108.593	244.342	26.7743	1.23319			795.227	6.68145		3.4078	52.7291	1.99808	7.7019	4.96448	1.11887	17.5279	6.57007	67.0275	25.0275	107.688	22.172	179.055	42.9623	9774.62	1.24298		47.7332	76.5267	0.623745	76.5267	2.54901	7.88963	12.2259
Europe	Romania	Danube River	Balica et al., 2020, Earth and Planetary Science Letters, 531, p.116005.	Danube	Danube.Spot 213	44.9229	29.627	1147.5	29.0496			1134.15	14.0034	1134.15			1.79357	170.045	10.2203	1.27913			1087.93	18.6189		0.00313482	20.8256	0.0983576	1.24744	2.67061	0.12693	13.6377	6.66966	79.2707	32.8857	152.512	33.331	257.192	68.5033	10691.6	3.44132		114.184	168.467	0.677786	168.467	1.08703	5.49062	16.2164
Europe	Romania	Danube River	Balica et al., 2020, Earth and Planetary Science Letters, 531, p.116005.	Danube	Danube.Spot 205	44.9229	29.627	1149	17.0021			1135.17	20.3706	1135.17			2.02369	103.118	2.96754	1.15177			686.967	22.774		0.00321698	9.70237	0.0704961	0.785796	1.77887	0.0203665	9.29356	4.51635	54.8802	23.0741	102.529	20.5083	154.11	35.6357	8969.96	3.13759		29.1942	98.7176	0.295734	98.7176	1.29842	3.32961	10.208
Europe	Romania	Danube River	Balica et al., 2020, Earth and Planetary Science Letters, 531, p.116005.	Danube	Danube.Spot 21	44.9229	29.627	1156.45	23.5772			1149.51	14.3805	1149.51			3.05402	128.338	11.9454	1.24277			728.747	8.5081		0.00271692	11.4541	0.0759764	0.844434	1.66055	0.122895	8.41536	4.31799	54.078	22.5452	108.169	24.7901	203.796	50.0477	12559.9	1.95765		130.688	422.95	0.308992	422.95	-0.885552	4.14395	11.1042
Europe	Romania	Danube River	Balica et al., 2020, Earth and Planetary Science Letters, 531, p.116005.	Danube	Danube.Spot 211	44.9229	29.627	1193.16	23.3379			1150.47	19.561	1150.47			36.3976	145.502	32.6217	1.13771			767.333	13.336		0.0112561	9.9482	0.111948	1.25529	2.21933	0.0953792	11.4199	5.1628	58.325	24.5484	109.473	23.628	191.173	45.2008	11483.4	2.68284		64.3797	200.244	0.321507	200.244	-1.35333	4.69816	11.4972
Europe	Romania	Danube River	Balica et al., 2020, Earth and Planetary Science Letters, 531, p.116005.	Danube	Danube.Spot 120	44.9229	29.627	1211.08	17.142			1189.24	24.1292	1189.24			5.78629	123.702	10.0269	1.13344			1007.69	10.6684		0.00744934	18.0003	0.205614	2.38756	3.90599	0.193831	17.9437	7.16237	79.2573	31.9798	140.299	28.8287	216.88	53.9453	8053.52	1.66512		33.7629	68.8357	0.490485	68.8357	1.62749	3.99427	14.9202
Europe	Romania	Danube River	Balica et al., 2020, Earth and Planetary Science Letters, 531, p.116005.	Danube	Danube.Spot 91	44.9229	29.627	1245.33	15.0773			1196.94	13.2764	1196.94			2.17537	120.034	8.10461	1.16311			1240.97	41.2684		0.00294151	15.1664	0.065901	0.897565	2.40611	0.116255	15.6622	7.66741	92.285	38.6057	174.607	35.892	268.851	63.3087	12544.4	7.24235		97.213	283.667	0.342701	283.667	0.285444	3.8758	18.2119
Europe	Romania	Danube River	Balica et al., 2020, Earth and Planetary Science Letters, 531, p.116005.	Danube	Danube.Spot 58	44.9229	29.627	1210.19	11.3046			1235.85	19.0778	1235.85			3.40797	131.085	13.9992	1.21627			686.09	4.66609		0.00320623	7.07347	0.0711972	0.944066	1.99127	0.118785	9.98574	4.39844	51.7957	21.8485	98.1139	20.231	163.674	39.9123	10935.6	0.99272		50.5078	145.168	0.347926	145.168	-0.931807	4.23265	10.2114
Europe	Romania	Danube River	Balica et al., 2020, Earth and Planetary Science Letters, 531, p.116005.	Danube	Danube.Spot 251	44.9229	29.627	1241.37	10.3235			1246.46	24.7773	1246.46			1.33247	37.4211	2.14222	1.15371			2054.25	7.07746		0.0160005	10.3486	0.524263	5.30161	8.03824	1.60479	35.994	15.3183	163.241	64.1116	279.775	55.7194	375.438	100.642	7665.72	1.34031		38.8485	54.4257	0.71379	54.4257	2.21022	1.2083	29.7507
Europe	Romania	Danube River	Balica et al., 2020, Earth and Planetary Science Letters, 531, p.116005.	Danube	Danube.Spot 85	44.9229	29.627	1033.97	15.9887			1262.46	52.9234	1262.46			308.547	308.578	39.303	1.14603			1863.05	16.2715		0.149236	16.8116	0.568417	5.33125	8.8321	0.38601	37.6567	14.7978	148.715	57.8895	250.104	49.3994	352.282	92.7702	9181.31	1.59482		110.042	95.673	1.15019	95.673	0.0371315	9.96378	27.1314
Europe	Romania	Danube River	Balica et al., 2020, Earth and Planetary Science Letters, 531, p.116005.	Danube	Danube.Spot 137	44.9229	29.627	1091.41	33.3117			1279.64	25.0848	1279.64			94.9323	210.831	426.704	1.22336			1113.84	18.7768		0.0785191	14.6974	0.346583	3.52759	5.00966	0.436413	21.1491	8.35537	87.6659	34.0049	145.113	28.3745	210.318	52.1424	9897.15	1.82402		77.28	120.525	0.641194	120.525	-2.46707	6.80759	16.1788
Europe	Romania	Danube River	Balica et al., 2020, Earth and Planetary Science Letters, 531, p.116005.	Danube	Danube.Spot 247	44.9229	29.627	1379.17	28.4025			1353.64	16.4951	1353.64			1.25822	224.511	8.96861	1.56846			1460.56	3.52469		0.00319525	9.08108	0.118655	1.4705	3.32228	0.662034	18.4712	8.15555	99.3266	43.8386	204.12	44.7331	337.107	96.8981	9501.65	0.636021		52.4832	151.92	0.345466	151.92	-0.150912	7.24932	21.5635
Europe	Romania	Danube River	Balica et al., 2020, Earth and Planetary Science Letters, 531, p.116005.	Danube	Danube.Spot 34	44.9229	29.627	1353.49	18.6973			1358.35	18.6924	1358.35			1.38542	186.967	15.8619	1.21913			2935.66	7.55791		0.0698856	10.3089	1.08594	10.3285	13.9271	1.24631	57.9948	22.4959	236.028	92.7722	391.568	77.3405	513.522	138.862	8825.19	1.09081		84.9483	147.6	0.57553	147.6	-0.400684	6.03705	42.3602
Europe	Romania	Danube River	Balica et al., 2020, Earth and Planetary Science Letters, 531, p.116005.	Danube	Danube.Spot 234	44.9229	29.627	1399.04	15.9981			1360.03	14.6182	1360.03			8.12308	128.477	3.09672	1.33144			1445.18	1.4219		0.0127385	6.97954	0.359555	4.42733	5.96084	0.803129	23.5804	9.99818	100.665	39.8824	173.653	35.3191	258.959	65.2315	10052.9	0.297655		93.7501	147.046	0.637557	147.046	0.343567	4.14845	20.5743
Europe	Romania	Danube River	Balica et al., 2020, Earth and Planetary Science Letters, 531, p.116005.	Danube	Danube.Spot 138	44.9229	29.627	1250.94	19.4122			1360.65	22.4248	1360.65			0.772078	147.783	18.1437	1.15871			469.103	4.32479		0.0035313	14.3128	0.060305	0.738649	1.29388	0.169431	6.1727	2.69865	35.1229	15.3971	73.6053	17.2381	153.04	39.2135	9535.31	0.851165		38.1305	65.8235	0.579284	65.8235	0.753454	4.7718	7.41015
Europe	Romania	Danube River	Balica et al., 2020, Earth and Planetary Science Letters, 531, p.116005.	Danube	Danube.Spot 30	44.9229	29.627	1377.99	19.8474			1376.72	20.1229	1376.72			7.97434	147.301	13.7345	1.15843			888.111	9.39334		0.00613713	9.56609	0.108829	1.20425	2.54635	0.126801	12.4891	5.67657	65.5649	27.6335	126.785	27.2791	216.91	52.4222	9998.57	1.55657		43.0494	114.867	0.374777	114.867	-0.187838	4.75625	13.2434
Europe	Romania	Danube River	Balica et al., 2020, Earth and Planetary Science Letters, 531, p.116005.	Danube	Danube.Spot 116	44.9229	29.627	1320.58	18.2748			1402.87	32.3921	1402.87			30.6434	193.325	8.8306	1.37112			1145.1	1.89736		0.021686	23.0142	0.338556	3.70439	4.85966	1.46015	20.5183	8.01681	85.358	35.8433	160.539	33.9652	257.343	73.6877	8651.75	0.292641		37.7728	58.1304	0.649795	58.1304	2.31119	6.24235	17.1071
Europe	Romania	Danube River	Balica et al., 2020, Earth and Planetary Science Letters, 531, p.116005.	Danube	Danube.Spot 74	44.9229	29.627	1386.83	14.4406			1413.34	18.6376	1413.34			296.27	145.531	271.428	1.10192			844.835	3.05978		0.0531942	12.3207	0.124638	1.19418	2.28416	0.552722	11.5837	5.13925	61.4384	26.2809	126.474	27.2331	209.151	54.9151	8756.84	0.432658		45.4965	111.644	0.407515	111.644	-2.31414	4.69908	12.7022
Europe	Romania	Danube River	Balica et al., 2020, Earth and Planetary Science Letters, 531, p.116005.	Danube	Danube.Spot 119	44.9229	29.627	1415.89	19.9093			1432.17	29.5303	1432.17			10.6584	157.045	32.3829	1.28333			549.967	4.07681		0.0193072	27.7847	0.136899	1.53706	2.24731	0.715299	9.09843	3.96409	43.1053	17.8634	82.9021	17.8051	152.676	38.939	9106.31	0.459169		20.9755	23.001	0.911937	23.001	2.31508	5.07086	8.57794
Europe	Romania	Danube River	Balica et al., 2020, Earth and Planetary Science Letters, 531, p.116005.	Danube	Danube.Spot 35	44.9229	29.627	1393.99	18.9482			1434.59	18.057	1434.59			3.98258	125.441	5.86285	1.21297			552.903	4.47452		0.0277203	19.7024	0.350875	3.51999	4.28988	1.4336	13.7646	4.75081	49.2987	17.8876	78.3098	16.0628	133.073	33.6515	9407.23	0.553499		70.6428	127.964	0.552052	127.964	1.71197	4.0504	8.47856
Europe	Romania	Danube River	Balica et al., 2020, Earth and Planetary Science Letters, 531, p.116005.	Danube	Danube.Spot 18	44.9229	29.627	1448.4	17.7998			1467.33	14.7434	1467.33			1.20089	119.344	15.413	1.22902			434.554	7.45843		0.0193052	32.1415	0.105705	0.937608	1.42987	0.354857	6.25812	2.71841	32.0859	13.2678	67.5121	15.6178	147.422	38.1242	11234.3	1.5226		52.9154	103.209	0.5127	103.209	1.90924	3.85353	7.0371
Europe	Romania	Danube River	Balica et al., 2020, Earth and Planetary Science Letters, 531, p.116005.	Danube	Danube.Spot 45	44.9229	29.627	1291.42	25.7976			1469.18	14.9255	1469.18			14.7058	96.9855	5.19376	1.16223			574.088	17.6802		0.0129386	6.12897	0.0341045	0.385379	0.85165	0.0301674	4.96715	2.63572	34.8727	16.5301	89.5698	23.3962	218.359	64.8429	12359.4	21.6595		62.1627	643.483	0.0966035	643.483	-1.61254	3.13159	9.1792
Europe	Romania	Danube River	Balica et al., 2020, Earth and Planetary Science Letters, 531, p.116005.	Danube	Danube.Spot 195	44.9229	29.627	1416.67	22.2211			1492.65	12.7327	1492.65			6.47544	137.823	6.91226	1.20203			707.992	8.12764		0.00604381	24.9198	0.0692087	0.869396	1.67364	0.163429	9.01646	4.05742	49.7745	21.5268	102.784	23.6632	199.802	51.3889	11944	2.1518		158.844	340.539	0.466449	340.539	1.12718	4.45022	10.8826
Europe	Romania	Danube River	Balica et al., 2020, Earth and Planetary Science Letters, 531, p.116005.	Danube	Danube.Spot 15	44.9229	29.627	1565.85	25.4464			1493.09	14.5383	1493.09			8.12138	149.272	19.4558	1.20999			795.84	8.90354		0.0854615	30.2556	0.371492	2.44617	3.07935	0.65401	12.5877	5.62347	62.3998	24.4449	116.693	26.5017	214.672	55.6791	11275.7	1.91759		193.346	316.936	0.610049	316.936	0.628012	4.81989	12.2734
Europe	Romania	Danube River	Balica et al., 2020, Earth and Planetary Science Letters, 531, p.116005.	Danube	Danube.Spot 172	44.9229	29.627	1495.27	23.6279			1534.44	14.577	1534.44			7.80963	197.221	11.529	1.23397			1075.65	7.81131		0.00697668	30.3337	0.129721	1.44684	2.59262	0.283049	13.4522	6.07818	74.6671	31.0022	145.254	32.4457	260.503	68.5477	11089.1	1.88229		214.468	333.361	0.643349	333.361	1.04291	6.36813	16.0744
Europe	Romania	Danube River	Balica et al., 2020, Earth and Planetary Science Letters, 531, p.116005.	Danube	Danube.Spot 173	44.9229	29.627	1444.64	33.3602			1541.46	14.4619	1541.46			228.773	189.747	110.362	1.1913			1028.7	10.6433		0.220316	66.6869	0.528917	3.86867	5.03443	1.12864	18.6067	7.4762	77.3772	30.8337	139.679	29.5047	234.094	61.1254	10645.5	1.86785		127.46	154.899	0.822863	154.899	1.11502	6.1268	15.6602
Europe	Romania	Danube River	Balica et al., 2020, Earth and Planetary Science Letters, 531, p.116005.	Danube	Danube.Spot 68	44.9229	29.627	1529.23	18.5848			1564.06	17.1953	1564.06			4.28339	103.255	13.8095	1.23376			530.769	4.95917		0.208579	5.5521	0.177171	1.04822	1.62308	0.044391	7.97002	3.68492	43.2307	18.1842	79.882	17.0629	144.435	33.5162	10805.6	0.775452		58.4166	98.2621	0.594498	98.2621	-1.00165	3.33403	8.08574
Europe	Romania	Danube River	Balica et al., 2020, Earth and Planetary Science Letters, 531, p.116005.	Danube	Danube.Spot 113	44.9229	29.627	1530.87	19.9388			1605.4	19.2751	1605.4			20.7408	83.2637	18.7051	1.19727			356.42	3.01511		0.00828991	4.14501	0.0634123	0.519034	0.965964	0.089349	5.5243	2.3195	27.1337	11.6683	52.6677	10.783	99.7652	21.5951	10253.8	0.485661		22.2438	38.5861	0.576473	38.5861	-0.961058	2.68853	5.41578
Europe	Romania	Danube River	Balica et al., 2020, Earth and Planetary Science Letters, 531, p.116005.	Danube	Danube.Spot 197	44.9229	29.627	1555.92	39.6057			1623.54	13.8075	1623.54			7.41403	213.753	124.371	1.34032			1253.94	6.31466		0.679645	15.5091	0.412201	2.32706	3.04347	0.47754	15.3503	7.18351	87.483	37.3498	178.353	38.6745	298.275	80.3801	10896.7	1.1461		102.359	168.061	0.609057	168.061	-1.59209	6.90194	18.6483
Europe	Romania	Danube River	Balica et al., 2020, Earth and Planetary Science Letters, 531, p.116005.	Danube	Danube.Spot 40	44.9229	29.627	1595.78	19.7861			1627.93	14.965	1627.93			1.58607	179.495	25.4649	1.3105			680.169	3.08774		0.00654904	22.284	0.200122	2.17096	3.47022	0.729154	12.7741	5.08712	54.7678	21.6644	97.497	21.2821	172.822	44.778	8881.16	0.53431		63.4817	71.9395	0.882432	71.9395	1.15072	5.79576	10.3991
Europe	Romania	Danube River	Balica et al., 2020, Earth and Planetary Science Letters, 531, p.116005.	Danube	Danube.Spot 97	44.9229	29.627	1572.53	19.5632			1632.08	14.2544	1632.08			13.8366	151.815	25.1202	1.30474			463.459	2.09148		0.056164	12.3338	0.1066	1.04243	1.61485	0.362172	7.22582	3.01186	33.9201	14.5509	65.4625	13.7664	121.467	28.8136	10283.8	0.308005		50.5367	81.502	0.620067	81.502	0.0271317	4.90201	7.02384
Europe	Romania	Danube River	Balica et al., 2020, Earth and Planetary Science Letters, 531, p.116005.	Danube	Danube.Spot 160	44.9229	29.627	1570.64	18.637			1641.81	15.1925	1641.81			60.5886	176.392	13.8436	1.36164			779.792	4.20795		0.00998664	25.3495	0.187986	2.21997	3.35793	0.687177	14.099	5.18107	58.3805	24.4203	112.615	25.2811	209.701	59.5989	9445.98	0.783951		82.116	119.784	0.685536	119.784	1.461	5.69557	12.0006
Europe	Romania	Danube River	Balica et al., 2020, Earth and Planetary Science Letters, 531, p.116005.	Danube	Danube.Spot 210	44.9229	29.627	1578.46	45.1217			1651.91	16.147	1651.91			36.6063	294.649	21.3074	1.40205			1005.29	7.79279		0.0044195	16.5804	0.0558481	0.801072	1.60991	0.269763	10.1603	5.08814	65.4152	29.8657	148.939	34.5353	290.71	78.6338	11753.6	2.08677		55.5558	146.689	0.378733	146.689	0.173585	9.51402	15.3487
Europe	Romania	Danube River	Balica et al., 2020, Earth and Planetary Science Letters, 531, p.116005.	Danube	Danube.Spot 53	44.9229	29.627	1674.32	45.6596			1655.42	15.1891	1655.42			62.5361	364.229	14.8798	1.41766			1403.54	5.92398		1.41249	27.5258	0.66292	2.98258	3.23711	0.440026	15.8095	7.4663	91.206	40.1422	191.385	42.0993	327.236	89.0103	11185.9	1.30584		85.3496	125.04	0.68258	125.04	1.50406	11.7607	20.7888
Europe	Romania	Danube River	Balica et al., 2020, Earth and Planetary Science Letters, 531, p.116005.	Danube	Danube.Spot 221	44.9229	29.627	1640.47	23.366			1662.45	14.8387	1662.45			4.07577	106.972	6.86462	1.20805			551.253	4.51173		0.00314256	28.8097	0.0706842	1.05793	1.81096	0.433206	7.9999	3.33141	39.1228	17.1447	82.0517	18.8192	172.52	45.9202	10661.7	0.906626		83.8672	133.342	0.628963	133.342	2.19903	3.45405	8.70668
Europe	Romania	Danube River	Balica et al., 2020, Earth and Planetary Science Letters, 531, p.116005.	Danube	Danube.Spot 177	44.9229	29.627	1532.78	25.7312			1665.44	23.0399	1665.44			1.14583	197.614	31.7498	1.34237			1430.98	3.70636		0.0688348	35.2197	0.900287	8.00925	8.99448	1.93637	31.2725	11.0554	113.617	43.4529	190.868	38.838	282.207	75.285	8382.06	0.4803		32.5198	36.1161	0.900425	36.1161	2.35223	6.38083	21.1453
Europe	Romania	Danube River	Balica et al., 2020, Earth and Planetary Science Letters, 531, p.116005.	Danube	Danube.Spot 219	44.9229	29.627	1630.12	36.7466			1677.2	16.4934	1677.2			10.9974	169.963	9.95038	1.2081			1172.83	5.90372		0.0703179	34.8307	0.304078	3.01638	4.18008	0.694079	15.9849	6.59471	78.0421	33.4664	159.126	36.3186	281.465	80.6024	9891.99	1.10406		135.737	175.652	0.772759	175.652	1.96702	5.488	17.5764
Europe	Romania	Danube River	Balica et al., 2020, Earth and Planetary Science Letters, 531, p.116005.	Danube	Danube.Spot 62	44.9229	29.627	1631.36	22.7321			1747.43	19.5165	1747.43			78.2968	225.176	45.6651	1.35687			1335.82	5.21676		0.0979285	32.3716	0.429111	4.25762	6.12239	1.52527	25.2371	9.75546	101.738	40.4897	175.896	35.6964	271.56	71.1608	9186.28	0.994003		129.332	129.444	0.999134	129.444	0.782071	7.27078	19.6728
Europe	Romania	Danube River	Balica et al., 2020, Earth and Planetary Science Letters, 531, p.116005.	Danube	Danube.Spot 61	44.9229	29.627	1775.48	25.3584			1765.31	19.8602	1765.31			1.14324	139.634	31.0201	1.2272			621.553	3.73499		0.0076533	45.2114	0.162745	2.19533	3.20386	0.776237	13.6486	5.06421	51.8444	20.0606	85.0143	17.6584	140.647	34.5114	8627.02	0.513854		32.7892	29.9077	1.09635	29.9077	2.9698	4.50869	9.53891
Europe	Romania	Danube River	Balica et al., 2020, Earth and Planetary Science Letters, 531, p.116005.	Danube	Danube.Spot 236	44.9229	29.627	1851.5	32.6882			1832.55	12.6971	1832.55			41.2521	710.36	8.12118	1.68927			2469.12	2.93026		0.00336514	1.69693	0.0460625	0.718776	2.37277	0.138906	17.3282	10.8219	160.789	72.7979	371.309	83.2569	619.938	167.363	12565.5	0.889469		34.3385	249.466	0.137648	249.466	-3.40775	22.9371	36.6676
Europe	Romania	Danube River	Balica et al., 2020, Earth and Planetary Science Letters, 531, p.116005.	Danube	Danube.Spot 193	44.9229	29.627	1930.08	35.9799			1866.82	13.4271	1866.82			1.13536	129.046	8.4716	1.32551			679.392	2.04541		0.00841859	3.72668	0.0990244	1.02278	2.0875	0.24404	10.8261	4.71813	52.2374	21.9608	97.9432	20.5063	162.197	41.7669	9576.74	0.546326		51.3274	171.356	0.299537	171.356	-1.75242	4.1668	10.1278
Europe	Romania	Danube River	Balica et al., 2020, Earth and Planetary Science Letters, 531, p.116005.	Danube	Danube.Spot 57	44.9229	29.627	1893.76	29.5065			1867.65	12.0306	1867.65			31.9857	281.661	12.7781	1.32246			963.106	2.11564		0.00396088	1.79694	0.0915924	0.975782	2.50932	0.0293506	12.4776	6.05393	70.0551	29.4425	129.1	27.8743	214.411	51.3263	11957.7	0.558122		86.8401	295.936	0.293443	295.936	-3.85013	9.09463	14.0665
Europe	Romania	Danube River	Balica et al., 2020, Earth and Planetary Science Letters, 531, p.116005.	Danube	Danube.Spot 121	44.9229	29.627	1823.27	28.021			1868.21	19.8429	1868.21			127.238	797.554	72.7994	1.35398			1282.11	1.9552		12.6355	51.8422	7.46287	28.1304	12.6887	3.50348	35.9466	11.6222	109.23	40.2204	159.471	29.8568	208.363	52.7907	7631.23	0.265776		28.9637	23.2274	1.24696	23.2274	2.68627	25.7525	19.0915
Europe	Romania	Danube River	Balica et al., 2020, Earth and Planetary Science Letters, 531, p.116005.	Danube	Danube.Spot 208	44.9229	29.627	1881.32	32.5945			1869.18	11.5981	1869.18			0.597944	190.656	16.3012	1.16813			956.696	13.8731		0.0111203	65.9958	0.220448	2.54088	3.81412	0.709684	14.964	6.43779	72.1482	28.839	128.707	28.2109	212.09	50.2888	9022.71	2.86052		133.894	155.455	0.861306	155.455	2.75418	6.15614	14.4853
Europe	Romania	Danube River	Balica et al., 2020, Earth and Planetary Science Letters, 531, p.116005.	Danube	Danube.Spot 129	44.9229	29.627	1805.58	19.732			1876.98	14.116	1876.98			4.65947	236.505	19.9389	1.31039			920.021	3.12111		0.00687466	11.7604	0.144159	1.6278	3.0322	0.495372	14.0336	6.08346	68.1373	28.0539	126.473	27.4171	208.659	56.2538	8391.02	0.600156		41.5635	71.2269	0.583536	71.2269	0.262012	7.63658	13.6308
Europe	Romania	Danube River	Balica et al., 2020, Earth and Planetary Science Letters, 531, p.116005.	Danube	Danube.Spot 246	44.9229	29.627	1712.51	34.8292			1922.84	16.3287	1922.84			5.94494	192.904	7.88465	1.30438			725.805	4.41657		0.00689592	11.1151	0.0550062	0.745386	1.75364	0.151683	9.84789	4.60941	54.639	23.1223	109.54	22.9633	183.987	47.1162	11831.9	1.07573		64.3137	136.139	0.47241	136.139	0.407054	6.22872	10.9528
Europe	Romania	Danube River	Balica et al., 2020, Earth and Planetary Science Letters, 531, p.116005.	Danube	Danube.Spot 218	44.9229	29.627	1962.89	38.8762			1943.56	13.511	1943.56			4.36492	111.816	9.05634	1.29942			512.277	6.43843		0.00872473	21.8937	0.0829363	0.776528	1.48629	0.226609	6.91169	3.17128	36.8866	16.1526	81.5363	19.2193	176.527	47.4732	12963	1.58055		116.646	209.04	0.558008	209.04	1.09151	3.61046	8.21715
Europe	Romania	Danube River	Balica et al., 2020, Earth and Planetary Science Letters, 531, p.116005.	Danube	Danube.Spot 5	44.9229	29.627	1697.26	21.5569			1961.57	13.728	1961.57			80.78	745.389	18.8333	1.19972			1555.01	7.59235		0.821877	12.0067	1.55399	9.02474	7.95703	0.335743	30.3021	11.5066	122.195	49.4339	205.241	38.9119	277.164	68.5015	10118.1	1.25501		60.8506	126.434	0.481283	126.434	-0.150666	24.0681	22.4786
Europe	Romania	Danube River	Balica et al., 2020, Earth and Planetary Science Letters, 531, p.116005.	Danube	Danube.Spot 1	44.9229	29.627	1938.5	72.791			1966.73	14.7864	1966.73			6.56974	308.223	13.9348	1.29644			1994.62	13.185		0.0164367	27.4102	0.458899	5.55151	9.61331	0.235018	38.4584	15.376	159.633	62.0729	255.939	51.9008	360.867	89.1395	11697.1	2.12729		278.461	413.399	0.673589	413.399	0.515593	9.9523	28.8709
Europe	Romania	Danube River	Balica et al., 2020, Earth and Planetary Science Letters, 531, p.116005.	Danube	Danube.Spot 6	44.9229	29.627	1854.15	43.392			1989.07	12.3707	1989.07			56.4912	71.1928	20.9225	1.17573			479.578	4.616		0.0427138	28.1804	0.321482	2.58087	3.43184	1.12561	12.2161	4.49063	39.8929	14.6927	61.0821	12.5296	113.949	26.3604	9890.61	0.974899		172.813	464.695	0.371885	464.695	0.109313	2.29877	7.33515
Europe	Romania	Danube River	Balica et al., 2020, Earth and Planetary Science Letters, 531, p.116005.	Danube	Danube.Spot 215	44.9229	29.627	2041.19	28.2863			1999.97	12.4452	1999.97			0.396712	136.558	4.50887	1.29551			574.698	3.99985		0.0121633	19.0719	0.137511	1.28677	1.91627	0.163947	8.36172	3.81523	43.0201	17.9864	84.3921	17.7801	156.75	38.0299	13011	0.772057		248.196	322.953	0.768519	322.953	1.07976	4.40935	8.80803
Europe	Romania	Danube River	Balica et al., 2020, Earth and Planetary Science Letters, 531, p.116005.	Danube	Danube.Spot 108	44.9229	29.627	2064.06	50.4271			2116.42	26.2725	2116.42			7.2733	438.64	17.4531	1.16972			2469.36	12.2957		0.242043	89.4127	3.53515	30.002	30.0696	4.97669	81.4493	26.4967	226.623	75.9111	277.971	51.9181	338.354	79.3431	10524.4	2.03861		211.476	174.421	1.21245	174.421	3.12224	14.1634	35.799
Europe	Romania	Danube River	Balica et al., 2020, Earth and Planetary Science Letters, 531, p.116005.	Danube	Danube.Spot 252	44.9229	29.627	1881.38	31.4886			2139.29	14.3351	2139.29			17.1197	106.905	21.274	1.25776			330.356	3.57398		0.00338093	3.30641	0.0522588	0.481437	0.955096	0.271088	4.41734	2.12155	24.3297	10.1578	47.0539	10.2381	97.6941	22.4719	9744.22	0.851501		17.2792	109.496	0.157806	109.496	-2.37074	3.45189	5.03892
Europe	Romania	Danube River	Balica et al., 2020, Earth and Planetary Science Letters, 531, p.116005.	Danube	Danube.Spot 151	44.9229	29.627	1998.71	25.185			2170.65	17.6074	2170.65			63.6825	76.6202	14.1626	1.23669			251.793	1.81079		0.00390472	13.7409	0.0603172	0.661425	1.0299	0.253716	4.7764	1.74495	19.1213	7.60545	33.9104	7.14979	72.4054	15.5522	9675.29	0.270086		71.9838	84.0443	0.856497	84.0443	0.685556	2.47401	3.90128
Europe	Romania	Danube River	Balica et al., 2020, Earth and Planetary Science Letters, 531, p.116005.	Danube	Danube.Spot 80	44.9229	29.627	2340.53	24.9529			2310.07	12.979	2310.07			2.35101	48.4067	4.40101	1.22521			425.912	4.14766		0.00463889	1.24049	0.00868658	0.0744518	0.275462	0.0950451	2.58453	1.61256	24.727	12.1934	69.7892	18.041	182.622	51.9432	13322.2	4.44253		48.2265	940.758	0.0512634	940.758	-4.57225	1.56302	6.93132
Europe	Romania	Danube River	Balica et al., 2020, Earth and Planetary Science Letters, 531, p.116005.	Danube	Danube.Spot 157	44.9229	29.627	2138.8	56.9265			2385.59	19.6166	2385.59			3.19674	179.425	10.9874	1.2012			762.372	22.7567		0.00344075	6.68695	0.0414934	0.632691	1.23291	0.142475	7.04879	3.95764	50.6121	22.6767	117.504	28.0624	233.911	65.0098	10912.4	8.99867		42.5377	331.62	0.128272	331.62	-1.53625	5.79351	11.7472
Europe	Romania	Danube River	Balica et al., 2020, Earth and Planetary Science Letters, 531, p.116005.	Danube	Danube.Spot 188	44.9229	29.627	2284.84	51.3749			2457.18	23.7724	2457.18			33.2577	235.62	8.66799	1.21891			982.236	8.09661		0.00985833	6.86295	0.198208	2.5578	5.72557	0.36131	26.092	10.0801	87.9957	30.2619	114.868	21.051	155.627	36.8422	10836.4	1.26952		62.2518	190.057	0.327543	190.057	-0.802018	7.60799	14.0326
Europe	Romania	Danube River	Balica et al., 2020, Earth and Planetary Science Letters, 531, p.116005.	Danube	Danube.Spot 167	44.9229	29.627	1995.41	40.2478			2464.63	11.9566	2464.63			269.892	53.5217	42.8613	1.20106			380.007	9.34788		0.0527932	10.3218	0.14683	0.999397	1.25922	0.285599	5.32511	2.21456	27.395	11.4641	56.8513	13.2626	128.453	30.6389	13189.8	1.65454		97.5143	428.677	0.227478	428.677	-2.18713	1.72818	5.98822
Europe	Romania	Danube River	Balica et al., 2020, Earth and Planetary Science Letters, 531, p.116005.	Danube	Danube.Spot 155	44.9229	29.627	2581.52	31.4819			2506.27	19.3527	2506.27			70.1127	177.137	18.0826	1.32988			450.94	1.3593		0.00218187	5.72706	0.0653239	0.877404	1.75156	0.220627	9.34213	4.09653	40.0139	14.3919	55.9493	10.7831	90.5424	18.6693	9800.89	0.238775		40.4028	27.4863	1.46993	27.4863	-0.0758492	5.71963	6.57968
Europe	Romania	Danube River	Balica et al., 2020, Earth and Planetary Science Letters, 531, p.116005.	Danube	Danube.Spot 14	44.9229	29.627	2272.28	41.8073			2541.74	14.1784	2541.74			10.8121	121.343	9.1844	1.27957			429.933	2.58206		0.00464282	2.57392	0.0456773	0.676584	1.72135	0.0780618	9.93671	4.00308	38.4668	14.1777	52.1128	9.44211	82.6057	16.3895	11325.4	0.653455		51.2399	271.638	0.188633	271.638	-2.86512	3.91807	6.22084
Europe	Romania	Danube River	Balica et al., 2020, Earth and Planetary Science Letters, 531, p.116005.	Danube	Danube.Spot 198	44.9229	29.627	2408.7	33.8892			2560.5	17.057	2560.5			126.274	285.834	289.388	1.12333			811.083	8.76374		1.06444	13.4702	1.09548	4.78632	4.45466	0.351685	16.6551	6.33996	68.4589	26.1231	114.631	21.9284	171.757	41.0777	9722.02	1.50458		191.597	300.569	0.637448	300.569	-3.07467	9.22937	12.0677
Europe	Romania	Danube River	Balica et al., 2020, Earth and Planetary Science Letters, 531, p.116005.	Danube	Danube.Spot 9	44.9229	29.627	2592.16	45.1147			2575.74	14.0928	2575.74			2.49315	91.3573	12.6522	1.15063			611.367	12.9353		0.0135831	43.1358	0.243764	2.52429	3.74769	0.646867	13.3777	4.74991	48.7785	18.9141	84.9856	19.7084	168.459	39.5367	10708.9	2.49225		189.235	281.919	0.671239	281.919	1.71906	2.94986	9.58701
Europe	Romania	Danube River	Balica et al., 2020, Earth and Planetary Science Letters, 531, p.116005.	Danube	Danube.Spot 17	44.9229	29.627	2694.94	35.3063			2578.04	14.4306	2578.04			152.45	240.378	8.18429	1.50249			445.767	1.41521		0.00375478	1.86203	0.0947657	1.31281	3.07733	0.109061	13.2859	4.56611	40.0967	14.4978	61.025	11.6234	104.723	23.0851	11681.1	0.315968		76.8833	301.702	0.254832	301.702	-3.41832	7.76163	6.67688
Europe	Romania	Danube River	Balica et al., 2020, Earth and Planetary Science Letters, 531, p.116005.	Danube	Danube.Spot 73	44.9229	29.627	2540.51	33.3024			2606.53	14.4764	2606.53			12.4029	147.307	24.5031	1.24861			425.098	3.1218		0.008022	16.7227	0.140896	1.70746	2.67858	0.424115	10.4323	3.75993	36.7411	13.7349	56.7748	11.5098	98.4634	20.9929	9761.9	0.504281		97.5097	77.5745	1.25698	77.5745	0.620176	4.75644	6.43027
Europe	Romania	Danube River	Balica et al., 2020, Earth and Planetary Science Letters, 531, p.116005.	Danube	Danube.Spot 159	44.9229	29.627	2559.96	51.6785			2630.07	13.7762	2630.07			28.1592	138.735	10.7307	1.24562			664.437	3.38827		0.0223137	13.6217	0.129791	1.68688	2.98449	0.337203	13.2128	4.98154	50.985	21.0172	93.3585	19.8217	158.169	40.5418	9319.6	0.643725		86.638	167.697	0.516635	167.697	0.311603	4.47966	9.98341
Europe	Romania	Danube River	Balica et al., 2020, Earth and Planetary Science Letters, 531, p.116005.	Danube	Danube.Spot 202	44.9229	29.627	2619.53	55.2351			2652.19	9.85986	2652.19			0.444073	141.608	5.22032	1.39127			862.85	2.45468		0.0506534	23.7841	0.280021	2.65416	4.08228	0.965711	16.1506	6.24031	65.2989	26.9581	123.811	27.7923	220.358	63.933	9485.83	0.365381		97.6145	143.28	0.681284	143.28	2.0415	4.57241	13.1801
Europe	Romania	Danube River	Balica et al., 2020, Earth and Planetary Science Letters, 531, p.116005.	Danube	Danube.Spot 39	44.9229	29.627	2657	30.2104			2692.12	15.1088	2692.12			3.04467	111.008	10.5646	1.25233			433.535	2.21491		0.00403715	13.059	0.122783	1.52545	2.71638	0.606503	9.96303	3.81531	36.5005	13.8447	61.8585	13.1401	116.214	28.1713	9298.83	0.347399		32.1294	43.9306	0.731368	43.9306	1.41483	3.58436	6.67922
Europe	Romania	Danube River	Balica et al., 2020, Earth and Planetary Science Letters, 531, p.116005.	Danube	Danube.Spot 71	44.9229	29.627	2442.85	56.7639			2701.39	22.6745	2701.39			29.9303	65.1138	6.02372	1.18828			263.522	4.13877		0.0327797	11.1316	0.0532916	0.432093	0.477726	0.150514	2.89042	1.36408	16.4424	7.57337	37.6036	9.05426	98.4623	23.6907	10955.5	0.83422		73.3064	209.819	0.349378	209.819	0.26782	2.10248	4.20812
Europe	Romania	Danube River	Balica et al., 2020, Earth and Planetary Science Letters, 531, p.116005.	Danube	Danube.Spot 78	44.9229	29.627	2666.64	30.2872			2765.02	12.1462	2765.02			12.711	145.693	10.4288	1.55319			820.234	2.16717		0.00805692	18.8197	0.191844	2.23211	3.02909	1.41922	12.321	4.8781	55.2999	23.9483	114.746	24.8441	208.284	59.6418	8108.33	0.186086		20.4378	40.2945	0.50721	40.2945	2.13557	4.70432	12.3788
Europe	Romania	Danube River	Balica et al., 2020, Earth and Planetary Science Letters, 531, p.116005.	Danube	Danube.Spot 87	44.9229	29.627	2728.56	51.0337			2961.84	16.0299	2961.84			166.718	361.234	19.1516	1.2425			1829.91	6.75115		0.72381	21.9495	0.506771	3.15661	4.22199	1.05139	22.3435	9.89043	119.308	51.8392	244.012	56.2938	416.758	125.068	9794.89	1.44685		178.814	300.149	0.595751	300.149	0.131689	11.664	26.9733
Europe	Romania	Danube River	Balica et al., 2020, Earth and Planetary Science Letters, 531, p.116005.	Danube	Danube.Spot 171	44.9229	29.627	3041.86	69.7446			3067.45	15.0153	3067.45			2.97152	85.0212	3.06261	1.22143			400.593	2.71402		0.00240748	11.7344	0.0584989	0.731277	1.28242	0.28365	5.31493	2.43178	27.1199	11.9798	59.185	13.723	131.23	35.7722	10994.8	0.861943		70.83	158.966	0.445566	158.966	1.18759	2.74527	6.29193
Europe	Romania	Danube River	Balica et al., 2020, Earth and Planetary Science Letters, 531, p.116005.	Danube	Danube.Spot 102	44.9229	29.627	2780.6	53.9444			3187.79	16.0073	3187.79			11.4884	380.146	12.7782	1.21233			683.225	4.46511		5.23067	22.5597	3.1386	10.0703	4.35778	0.242948	12.6946	5.01664	55.1414	21.5535	98.1266	21.7207	183.945	44.5932	11255.1	1.55394		86.1919	300.428	0.286897	300.428	0.529797	12.2746	10.6216
Asia	India	Indus River	Zhu et al., 2020, Earth and Planetary Science Letters, 536, p.116140.	CALLEN\010827\IND	CALLEN\010827\IND-106	24.2079	67.7327							21.2736				52.3717								0.0796352	25.3344		0.774637	0.76742	24.4139			41.3518					24.5299					988.7	0	988.7	#DIV/0!	1.69105	0.74714
Asia	India	Indus River	Zhu et al., 2020, Earth and Planetary Science Letters, 536, p.116140.	CALLEN\010827\IND	CALLEN\010827\IND-094	24.2079	67.7327							24.7739				65.4907								0.0635423	62.7928		2.31788	2.53251	57.5516			82.9764					39.2792					2327.31	0	2327.31	#DIV/0!	2.11465	1.59528
Europe	Germany	Rhine River	Zhu et al., 2020, Earth and Planetary Science Letters, 536, p.116140.	callen\060609\e10	callen\060609\e10-079	53.9222	8.72222							24.9116				52.9554					586.764			0.0437271	38.0058			1.13431	0.497147			31.1398					60.2546					218.586	0	218.586	#DIV/0!	1.70989	7.41861
Asia	India	Indus River	Zhu et al., 2020, Earth and Planetary Science Letters, 536, p.116140.	CALLEN\010827\IND	CALLEN\010827\IND-130	24.2079	67.7327							25.0507				337.159									0.485171		1.0156	0.577554	44.5229			68.1395					30.5422					1262.65	0	1262.65	#DIV/0!	10.8866	0.901107
Asia	India	Ganges	Zhu et al., 2020, Earth and Planetary Science Letters, 536, p.116140.	callen\030303\gan	callen\030303\gan05-i5	23.8544	89.4217							25.7522				31.543									0.27347		0.181478	0.394816	0.221139			37.754					33.3423					326.449	0	326.449	#DIV/0!	1.0185	0.43015
Europe	Germany	Rhine River	Zhu et al., 2020, Earth and Planetary Science Letters, 536, p.116140.	callen\060609\e10	callen\060609\e10-005	53.9222	8.72222							25.8559				73.3911					949.737			0.0719735	28.9165			4.19954	2.64141			68.1099					70.7905					134.179	0	134.179	#DIV/0!	2.36975	11.7591
Asia	India	Ganges	Zhu et al., 2020, Earth and Planetary Science Letters, 536, p.116140.	callen\030820\gr8	callen\030820\gr8-41	23.8544	89.4217							27.6355				136.505									0.461911							26.4526					11.5328					445.491	0	445.491	#DIV/0!	4.40767	0.231984
Europe	Italy	Po River	Zhu et al., 2020, Earth and Planetary Science Letters, 536, p.116140.	wang yan\070105\po	wang yan\070105\po-159	44.9525	12.4319							30.1446				141.008									10.2653			3.3797	0.760234			47.3419					31.4407					1197.51	0	1197.51	#DIV/0!	4.55306	0.57174
Europe	Italy	Po River	Zhu et al., 2020, Earth and Planetary Science Letters, 536, p.116140.	callen\041216\po	callen\041216\po-133	44.9525	12.4319							31.333				207.504					1700.66				32.0961		0.783801	2.8302	0.71089			126.949					124.253					3080.33	0	3080.33	#DIV/0!	6.70015	20.8793
Europe	Italy	Po River	Zhu et al., 2020, Earth and Planetary Science Letters, 536, p.116140.	wang yan\070105\po	wang yan\070105\po-156	44.9525	12.4319							31.7396				289.774								0.0433313	9.3076			1.6792	0.767311			62.3447					74.9289					251.497	0	251.497	#DIV/0!	9.35661	0.894785
Europe	Italy	Po River	Zhu et al., 2020, Earth and Planetary Science Letters, 536, p.116140.	wang yan\070105\po	wang yan\070105\po-163	44.9525	12.4319							31.9958				166.892									10.8411			1.14468	0.313313			30.9812					38.3229					270.496	0	270.496	#DIV/0!	5.38883	0.496695
Europe	Italy	Po River	Zhu et al., 2020, Earth and Planetary Science Letters, 536, p.116140.	wang yan\070105\po	wang yan\070105\po-173	44.9525	12.4319							32.8729				251.915								0.0479558	11.8496			1.90359	0.576864			63.4972					71.798					169.961	0	169.961	#DIV/0!	8.13416	0.902403
Europe	Italy	Po River	Zhu et al., 2020, Earth and Planetary Science Letters, 536, p.116140.	wang yan\070105\po	wang yan\070105\po-197	44.9525	12.4319							33.0225				250.411								0.0569031	9.99968			2.27271	0.464232			62.9995					73.7659					273.462	0	273.462	#DIV/0!	8.08561	0.899159
Europe	Italy	Po River	Zhu et al., 2020, Earth and Planetary Science Letters, 536, p.116140.	callen\041216\po	callen\041216\po-031	44.9525	12.4319							38.1843				273.473					923.277				12.0205		1.52769	3.13757	0.796109			75.4028					69.4222					445.838	0	445.838	#DIV/0!	8.83027	11.3688
Europe	Italy	Po River	Zhu et al., 2020, Earth and Planetary Science Letters, 536, p.116140.	callen\041216\po	callen\041216\po-035	44.9525	12.4319							39.3303				155.718					702.467			0.0657305	29.5953		0.745909	1.66218	0.718798			49.7423					74.4317					713.327	0	713.327	#DIV/0!	5.02803	8.86586
Europe	Italy	Po River	Zhu et al., 2020, Earth and Planetary Science Letters, 536, p.116140.	callen\041216\po	callen\041216\po-099	44.9525	12.4319							42.9841				216.944					604.558			0.216172	15.0995		0.945147	1.77632	0.527258			51.3101					45.3831					188.954	0	188.954	#DIV/0!	7.00497	7.50668
Asia	India	Indus River	Zhu et al., 2020, Earth and Planetary Science Letters, 536, p.116140.	CALLEN\010827\IND	CALLEN\010827\IND-020	24.2079	67.7327							50.2034				169.898								0.0815963	7.40667		2.08621	0.354965	59.8188			91.2539					39.2497					207.463	0	207.463	#DIV/0!	5.48588	1.24967
Asia	India	Indus River	Zhu et al., 2020, Earth and Planetary Science Letters, 536, p.116140.	CALLEN\010827\IND	CALLEN\010827\IND-057	24.2079	67.7327							54.9968				219.813								0.108533	4.13222		2.21502	0.964643	122.65			197.846					70.837					119.78	0	119.78	#DIV/0!	7.0976	2.48126
Asia	India	Indus River	Zhu et al., 2020, Earth and Planetary Science Letters, 536, p.116140.	CALLEN\010827\IND	CALLEN\010827\IND-037	24.2079	67.7327							57.852				27.6851								0.0439967	62.4528		5.52957	4.73813	191.32			397.766					191.182					1166.82	0	1166.82	#DIV/0!	0.893934	5.31488
Asia	India	Indus River	Zhu et al., 2020, Earth and Planetary Science Letters, 536, p.116140.	CALLEN\010827\IND	CALLEN\010827\IND-046	24.2079	67.7327							58.2509				280.118									14.8561		2.27372	0.256412	75.0489			119.685					45.6934					179.525	0	179.525	#DIV/0!	9.0448	1.61488
Asia	India	Indus River	Zhu et al., 2020, Earth and Planetary Science Letters, 536, p.116140.	CALLEN\010827\IND	CALLEN\010827\IND-124	24.2079	67.7327							58.9188				104.215									6.96447		0.609762	0.310851	20.7902			50.484					42.4948					520.154	0	520.154	#DIV/0!	3.36504	0.746282
Asia	India	Indus River	Zhu et al., 2020, Earth and Planetary Science Letters, 536, p.116140.	CALLEN\010827\IND	CALLEN\010827\IND-096	24.2079	67.7327							59.7561				190.282									4.19832		0.658326	0.586376	28.4354			59.1856					38.2779					84.5959	0	84.5959	#DIV/0!	6.14407	0.808455
Asia	India	Indus River	Zhu et al., 2020, Earth and Planetary Science Letters, 536, p.116140.	CALLEN\010827\IND	CALLEN\010827\IND-099	24.2079	67.7327							62.3817				1210.13								0.167284	14.6769		1.13278	0.655791	160.114			329.945					165.146					322.638	0	322.638	#DIV/0!	39.0742	4.14568
Europe	Hungary	Danube River	Zhu et al., 2020, Earth and Planetary Science Letters, 536, p.116140.	callen\060215\e2	callen\060215\e2-007	53.9222	8.72222							73.0035				232.663					1267.98			0.139578	21.4083			5.73866	2.48218			104.353					86.9308					444.743	0	444.743	#DIV/0!	7.51254	15.6103
Asia	India	Indus River	Zhu et al., 2020, Earth and Planetary Science Letters, 536, p.116140.	CALLEN\010827\IND	CALLEN\010827\IND-061	24.2079	67.7327							77.5393				106.635									5.95429			0.263896	21.6465			48.3139					33.5219					162.723	0	162.723	#DIV/0!	3.44316	0.675536
Asia	India	Indus River	Zhu et al., 2020, Earth and Planetary Science Letters, 536, p.116140.	CALLEN\010827\IND	CALLEN\010827\IND-034	24.2079	67.7327							102.957				340.733								0.848043	15.9364		1.52993	0.285191	37.4393			63.6959					25.4959					223.478	0	223.478	#DIV/0!	11.002	0.916339
Asia	India	Indus River	Zhu et al., 2020, Earth and Planetary Science Letters, 536, p.116140.	CALLEN\010827\IND	CALLEN\010827\IND-085	24.2079	67.7327							107.928				116.847									2.15098		0.633927	0.154122	27.3506			35.3092					13.92					243.414	0	243.414	#DIV/0!	3.7729	0.497542
Asia	India	Indus River	Zhu et al., 2020, Earth and Planetary Science Letters, 536, p.116140.	CALLEN\010827\IND	CALLEN\010827\IND-012	24.2079	67.7327							110.153				291.737									14.6871		1.40953	0.615253	79.5449			137.197					53.0634					219.975	0	219.975	#DIV/0!	9.42	1.78953
Europe	Hungary	Danube River	Zhu et al., 2020, Earth and Planetary Science Letters, 536, p.116140.	callen\060215\e2	callen\060215\e2-109	53.9222	8.72222							153.541				1072.86					5491.75			0.0454926	23.9727			16.6997	3.98457			527.184					226.319					62.9515	0	62.9515	#DIV/0!	34.6418	66.6207
Asia	India	Indus River	Zhu et al., 2020, Earth and Planetary Science Letters, 536, p.116140.	CALLEN\010827\IND	CALLEN\010827\IND-035	24.2079	67.7327							156.229				199.848									11.7511		0.743925	0.499577	49.2115			92.1189					44.727					183.662	0	183.662	#DIV/0!	6.45294	1.23859
Asia	India	Indus River	Zhu et al., 2020, Earth and Planetary Science Letters, 536, p.116140.	CALLEN\010827\IND	CALLEN\010827\IND-128	24.2079	67.7327							160.434				345.798								0.0719712	9.14428		0.899503	0.40602	55.6147			98.4236					44.1151					128.422	0	128.422	#DIV/0!	11.1656	1.29838
Asia	India	Indus River	Zhu et al., 2020, Earth and Planetary Science Letters, 536, p.116140.	CALLEN\010827\IND	CALLEN\010827\IND-007	24.2079	67.7327							183.305				211.825									5.27898		0.479218	0.199258	52.4379			109.542					57.1551					1449.1	0	1449.1	#DIV/0!	6.83967	1.38802
Europe	Germany	Fehrman Island	Zhu et al., 2020, Earth and Planetary Science Letters, 536, p.116140.	callen\051012\e5	callen\051012\e5-138	53.9222	8.72222							186.91				36.4541					206.854			0.0373918	1.70773			0.760114	0.427382			18.3612					17.8394					29.0454	0	29.0454	#DIV/0!	1.17708	2.56207
Europe	Italy	Po River	Zhu et al., 2020, Earth and Planetary Science Letters, 536, p.116140.	wang yan\070105\po	wang yan\070105\po-203	44.9525	12.4319							194.921				276.535									13.037			7.04102	0.925825			129.104					67.7576					440.684	0	440.684	#DIV/0!	8.92912	1.32763
Europe	Italy	Po River	Zhu et al., 2020, Earth and Planetary Science Letters, 536, p.116140.	callen\041216\po	callen\041216\po-020	44.9525	12.4319							223.235				585.077					2904.81				12.1123		5.33728	11.8514	0.605193			278.705					135.613					576.702	0	576.702	#DIV/0!	18.8917	35.3713
Europe	Germany	Rhine River	Zhu et al., 2020, Earth and Planetary Science Letters, 536, p.116140.	callen\060609\e10	callen\060609\E10-118	53.9222	8.72222							225.003				272.603								0.0652729	54.9272			5.03145	1.37655			142.174					122.67					1263.77	0	1263.77	#DIV/0!	8.80217	2.01093
Europe	Italy	Po River	Zhu et al., 2020, Earth and Planetary Science Letters, 536, p.116140.	callen\041216\po	callen\041216\po-055	44.9525	12.4319							233.002				949.521					2416.7				24.4756		1.08789	4.12416	1.54331			189.384					166.285					570.427	0	570.427	#DIV/0!	30.6594	29.5199
Europe	Italy	Po River	Zhu et al., 2020, Earth and Planetary Science Letters, 536, p.116140.	callen\041216\po	callen\041216\po-053	44.9525	12.4319							234.431				319.015					1467.48			0.0827454	13.6052		4.53549	8.27678	1.45511			142.167					66.9301					256.655	0	256.655	#DIV/0!	10.3008	17.9582
Europe	Italy	Po River	Zhu et al., 2020, Earth and Planetary Science Letters, 536, p.116140.	wang yan\070105\po	wang yan\070105\po-187	44.9525	12.4319							239.451				508.096									2.50637			3.634	0.159276			84.421					38.3642					70.3308	0	70.3308	#DIV/0!	16.4061	0.781838
Europe	Italy	Po River	Zhu et al., 2020, Earth and Planetary Science Letters, 536, p.116140.	wang yan\070105\po	wang yan\070105\po-179	44.9525	12.4319							244.362				269.199									11.67			4.69795	0.786407			109.525					67.6498					294.892	0	294.892	#DIV/0!	8.69224	1.18028
Europe	Hungary	Danube River	Zhu et al., 2020, Earth and Planetary Science Letters, 536, p.116140.	callen\060215\e2	callen\060215\e2-117	53.9222	8.72222							247.706				208.136					838.833				18.7768			3.8531	0.954804			74.03					49.9687					252.694	0	252.694	#DIV/0!	6.72057	10.3427
Europe	Germany	Rhine River	Zhu et al., 2020, Earth and Planetary Science Letters, 536, p.116140.	callen\060609\e10	callen\060609\e10-091	53.9222	8.72222							251.549				1327.31					2258.1			0.086141	0.766311			2.38236	0.0869837			176.583					135.785					1054.87	0	1054.87	#DIV/0!	42.8578	27.2855
Europe	Italy	Po River	Zhu et al., 2020, Earth and Planetary Science Letters, 536, p.116140.	wang yan\070105\po	wang yan\070105\po-206	44.9525	12.4319							252.311				968.28								0.54563	17.2719			3.41602	0.452566			102.435					84.8828					657.219	0	657.219	#DIV/0!	31.2651	1.26831
Europe	Italy	Po River	Zhu et al., 2020, Earth and Planetary Science Letters, 536, p.116140.	callen\041216\po	callen\041216\po-061	44.9525	12.4319							252.709				652.91					2302.31				38.0703		2.91573	8.28073	0.642818			210.698					99.7677					1105.92	0	1105.92	#DIV/0!	21.082	28.1157
Europe	Italy	Po River	Zhu et al., 2020, Earth and Planetary Science Letters, 536, p.116140.	callen\041216\po	callen\041216\po-076	44.9525	12.4319							253.482				518.368					1449.91				4.50864		2.9985	6.61489	0.516621			142.179					68.4158					269.386	0	269.386	#DIV/0!	16.7378	17.6757
Europe	Germany	Fehrman Island	Zhu et al., 2020, Earth and Planetary Science Letters, 536, p.116140.	callen\051012\e5	callen\051012\e5-075	53.9222	8.72222							256.412				63.9934					2002.26			0.140444	54.949			6.36265	1.87768			130.368					160.464					313.879	0	313.879	#DIV/0!	2.0663	24.6896
Europe	France	Rhone River	Zhu et al., 2020, Earth and Planetary Science Letters, 536, p.116140.	wang yan\061213\e12	wang yan\061213\e12-090	53.9222	8.72222							256.691				29.6122					223.33			0.558872	34.1628			5.49586	8.01052			18.1838					14.1503					1782.03	0	1782.03	#DIV/0!	0.956159	3.04202
Europe	Poland	Oder River	Zhu et al., 2020, Earth and Planetary Science Letters, 536, p.116140.	CALLEN\060223\E3	CALLEN\060223\E3-136	53.9222	8.72222							258.171				130.81					2039.7			0.230943	120.446			3.95603	1.35176			138.507					149.14					406.125	0	406.125	#DIV/0!	4.22378	25.5449
Europe	Germany	Fehrman Island	Zhu et al., 2020, Earth and Planetary Science Letters, 536, p.116140.	callen\051012\e5	callen\051012\e5-081	53.9222	8.72222							258.972				133.635					1298.34			0.0714799	43.4181			11.1886	2.15711			133.089					60.6506					96.7537	0	96.7537	#DIV/0!	4.31498	16.169
Europe	Germany	Fehrman Island	Zhu et al., 2020, Earth and Planetary Science Letters, 536, p.116140.	callen\051012\e5	callen\051012\e5-093	53.9222	8.72222							259.173				1184.41					7058.5			0.518798	371.509			106.768	29.3111			870.501					259.41					290.687	0	290.687	#DIV/0!	38.2437	89.7956
Europe	Germany	Rhine River	Zhu et al., 2020, Earth and Planetary Science Letters, 536, p.116140.	callen\060609\e10	callen\060609\E10-142	53.9222	8.72222							259.351				1285.76					2315.84			0.0704802	1.13029			2.44711	0.206402			179.671					167.155					1171.43	0	1171.43	#DIV/0!	41.5164	28.137
Europe	Germany	Fehrman Island	Zhu et al., 2020, Earth and Planetary Science Letters, 536, p.116140.	callen\051012\e5	callen\051012\e5-072	53.9222	8.72222							259.859				188.359					585.544			0.0500966	20.6838			4.01784	0.635148			58.1289					30.2798					84.4359	0	84.4359	#DIV/0!	6.08199	7.29617
Europe	Germany	Fehrman Island	Zhu et al., 2020, Earth and Planetary Science Letters, 536, p.116140.	callen\051012\e5	callen\051012\e5-085	53.9222	8.72222							261.831				234.207					2166.48				111.616			5.70006	1.44025			194.116					107.981					144.937	0	144.937	#DIV/0!	7.56239	27.0255
Europe	Germany	Fehrman Island	Zhu et al., 2020, Earth and Planetary Science Letters, 536, p.116140.	callen\051012\e5	callen\051012\e5-139	53.9222	8.72222							262.042				55.0134					1553.31			0.124394	96.1855			9.41345	1.87891			112.77					145.547					139.475	0	139.475	#DIV/0!	1.77635	19.7606
Europe	Italy	Po River	Zhu et al., 2020, Earth and Planetary Science Letters, 536, p.116140.	callen\041216\po	callen\041216\po-002	44.9525	12.4319							262.061				355.487					1241.21			0.0722752	8.2067		1.71219	4.22832	0.475439			112.369					60.8955					231.305	0	231.305	#DIV/0!	11.4784	15.1035
Europe	Poland	Oder River	Zhu et al., 2020, Earth and Planetary Science Letters, 536, p.116140.	CALLEN\060223\E3	CALLEN\060223\E3-108	53.9222	8.72222							262.193				232.095					1099.74				7.89841			7.11015	0.383809			108.724					53.8622					79.3184	0	79.3184	#DIV/0!	7.49418	13.4536
Europe	Germany	Fehrman Island	Zhu et al., 2020, Earth and Planetary Science Letters, 536, p.116140.	callen\051012\e5	callen\051012\e5-055	53.9222	8.72222							262.447				448.096					2535.2				156.607			11.3276	2.14154			248.25					110.113					286.53	0	286.53	#DIV/0!	14.4687	31.8816
Europe	Poland	Oder River	Zhu et al., 2020, Earth and Planetary Science Letters, 536, p.116140.	CALLEN\060223\E3	CALLEN\060223\E3-167	53.9222	8.72222							262.475				44.1974					719.563			0.0697707	42.6482			5.5635	0.921041			59.2228					70.4211					53.4516	0	53.4516	#DIV/0!	1.42711	9.20889
Europe	Italy	Po River	Zhu et al., 2020, Earth and Planetary Science Letters, 536, p.116140.	wang yan\070105\po	wang yan\070105\po-170	44.9525	12.4319							262.794				67.9951									3.259			0.598777	0.138892			24.2735					24.7272					387.74	0	387.74	#DIV/0!	2.19551	0.318831
Europe	France	Rhone River	Zhu et al., 2020, Earth and Planetary Science Letters, 536, p.116140.	wang yan\061213\e12	wang yan\061213\e12-135	53.9222	8.72222							263.458				178.566					578.357			0.389677	7.77219			1.64237	0.397715			44.6705					54.604					367.05	0	367.05	#DIV/0!	5.76577	7.16443
Europe	Italy	Po River	Zhu et al., 2020, Earth and Planetary Science Letters, 536, p.116140.	wang yan\070105\po	wang yan\070105\po-205	44.9525	12.4319							264.341				156.366								0.0537633	12.167			1.35382	0.388231			58.7176					58.3995					606.084	0	606.084	#DIV/0!	5.04894	0.793838
Europe	Hungary	Danube River	Zhu et al., 2020, Earth and Planetary Science Letters, 536, p.116140.	callen\060215\e2	callen\060215\e2-033-2	53.9222	8.72222							266.094				290.777					1858.89			0.0372164	14.1033			5.10002	0.419156			163.138					97.0671					1116.08	0	1116.08	#DIV/0!	9.38899	22.6061
Europe	Germany	Fehrman Island	Zhu et al., 2020, Earth and Planetary Science Letters, 536, p.116140.	callen\051012\e5	callen\051012\e5-087	53.9222	8.72222							267.621				121.841					672.6				18.2465			2.59921	0.217164			62.7553					37.1948					148.587	0	148.587	#DIV/0!	3.93415	8.31348
Europe	Germany	Fehrman Island	Zhu et al., 2020, Earth and Planetary Science Letters, 536, p.116140.	callen\051012\e5	callen\051012\e5-126	53.9222	8.72222							268.11				205.025					1503.29			0.0470383	56.4144			6.7879	1.37789			128.079					96.5488					398.381	0	398.381	#DIV/0!	6.62011	18.707
Europe	Italy	Po River	Zhu et al., 2020, Earth and Planetary Science Letters, 536, p.116140.	callen\041216\po	callen\041216\po-027	44.9525	12.4319							269.606				247.948					418.257				10.545		3.02317	3.80147	0.271583			43.3962					24.7907					79.3604	0	79.3604	#DIV/0!	8.00607	5.23682
Europe	Italy	Po River	Zhu et al., 2020, Earth and Planetary Science Letters, 536, p.116140.	callen\041216\po	callen\041216\po-043	44.9525	12.4319							269.888				648.575					1354.7			0.635604	4.63442		5.05779	6.07714	0.844968			127.249					64.8483					333.926	0	333.926	#DIV/0!	20.942	16.5109
Europe	Germany	Fehrman Island	Zhu et al., 2020, Earth and Planetary Science Letters, 536, p.116140.	callen\051012\e5	callen\051012\e5-032	53.9222	8.72222							270.289				126.739					1663.91				90.5022			2.54205	1.0512			107.477					115.713					151.663	0	151.663	#DIV/0!	4.09231	20.7091
Europe	Germany	Rhine River	Zhu et al., 2020, Earth and Planetary Science Letters, 536, p.116140.	callen\060609\e10	callen\060609\e10-011	53.9222	8.72222							271.176				337.921					1440.16				8.4241			7.11414	1.02993			132.667					61.6437					91.6178	0	91.6178	#DIV/0!	10.9112	17.4826
Europe	Germany	Elbe River	Zhu et al., 2020, Earth and Planetary Science Letters, 536, p.116140.	ziyi zhu\180430\Elbe	ziyi zhu\180430\Elbe-078	53.831	8.82492							271.7				536					1589			0.023	64.66		2		0.697			137.6					83.5					167.9	0	167.9	#DIV/0!	17.3071	19.6781
Europe	Italy	Po River	Zhu et al., 2020, Earth and Planetary Science Letters, 536, p.116140.	callen\041216\po	callen\041216\po-022	44.9525	12.4319							271.759				149.223					277.563			0.0711164	2.75096				0.196454			23.0831					18.5903					90.7326	0	90.7326	#DIV/0!	4.8183	3.39191
Europe	Poland	Oder River	Zhu et al., 2020, Earth and Planetary Science Letters, 536, p.116140.	CALLEN\060223\E3	CALLEN\060223\E3-113	53.9222	8.72222							271.997				250.025					699.619				8.09328			5.27153	0.547975			74.3029					34.3058					63.4432	0	63.4432	#DIV/0!	8.07313	8.61943
Europe	Poland	Oder River	Zhu et al., 2020, Earth and Planetary Science Letters, 536, p.116140.	CALLEN\060223\E3	CALLEN\060223\E3-072	53.9222	8.72222							273.006				243.029					594.289			0.0503445	10.5816			3.60006	0.613474			61.209					33.9353					103.005	0	103.005	#DIV/0!	7.84724	7.35937
Europe	Germany	Fehrman Island	Zhu et al., 2020, Earth and Planetary Science Letters, 536, p.116140.	callen\051012\e5	callen\051012\e5-080	53.9222	8.72222							273.202				28.9062					3182.2			0.204483	65.8175			17.572	8.29818			270.711					162.873					369.692	0	369.692	#DIV/0!	0.933363	39.0345
Europe	Portugal	Tagus River	Zhu et al., 2020, Earth and Planetary Science Letters, 536, p.116140.	ziyi zhu\180928\Tag2	ziyi zhu\180929\Tag2-101	38.9227	-8.99893							274.597				1144					2395			0.85	14.2		13.9	15.9	1.7			240					109.3					464	0	464	#DIV/0!	36.939	29.3626
Europe	Hungary	Danube River	Zhu et al., 2020, Earth and Planetary Science Letters, 536, p.116140.	callen\060215\e2	callen\060215\e2-114	53.9222	8.72222							274.619				398.015					2615.44			0.226015	40.3223			9.13175	0.134598			252.151					107.548					1165.08	0	1165.08	#DIV/0!	12.8516	31.9373
Europe	Italy	Po River	Zhu et al., 2020, Earth and Planetary Science Letters, 536, p.116140.	wang yan\070105\po	wang yan\070105\po-164	44.9525	12.4319							274.844				270.529								0.143638	6.69446			2.88747	0.364247			77.781					41.7002					301.047	0	301.047	#DIV/0!	8.73519	0.787351
Europe	France	Rhone River	Zhu et al., 2020, Earth and Planetary Science Letters, 536, p.116140.	wang yan\061213\e12	wang yan\061213\e12-174	53.9222	8.72222							274.871				802.258					3120.45				24.6923			15.3061	5.99653			303.183					148.302					1454.08	0	1454.08	#DIV/0!	25.9044	38.1314
Europe	Germany	Fehrman Island	Zhu et al., 2020, Earth and Planetary Science Letters, 536, p.116140.	callen\051012\e5	callen\051012\e5-044	53.9222	8.72222							274.993				211.883					547.988				14.1769			2.06199	0.604357			48.2844					39.592					94.14	0	94.14	#DIV/0!	6.84156	6.80634
Europe	Poland	Oder River	Zhu et al., 2020, Earth and Planetary Science Letters, 536, p.116140.	CALLEN\060223\E3	CALLEN\060223\E3-044	53.9222	8.72222							275.108				228.222					2249.67			0.643687	34.2349			17.4635	1.48476			226.187					95.3543					656.168	0	656.168	#DIV/0!	7.36912	27.6173
Europe	Italy	Po River	Zhu et al., 2020, Earth and Planetary Science Letters, 536, p.116140.	callen\041216\po	callen\041216\po-038	44.9525	12.4319							275.179				256.893					1018.42			0.469517	14.3814		1.17345	2.01705	0.335313			81.1095					71.9921					1030.29	0	1030.29	#DIV/0!	8.2949	12.4961
Europe	Portugal	Tagus River	Zhu et al., 2020, Earth and Planetary Science Letters, 536, p.116140.	ziyi zhu\180928\Tag2	ziyi zhu\180929\Tag2-118	38.9227	-8.99893							275.487				728					1970			0.63	12.7		12.2	14.7	0.94			200					88.9					839	0	839	#DIV/0!	23.5066	24.1822
Europe	Germany	Fehrman Island	Zhu et al., 2020, Earth and Planetary Science Letters, 536, p.116140.	callen\051012\e5	callen\051012\e5-003	53.9222	8.72222							275.617				248.534					953.274				12.344			7.31605	0.824527			95.1303					44.1465					94.0739	0	94.0739	#DIV/0!	8.025	11.7028
Europe	Hungary	Danube River	Zhu et al., 2020, Earth and Planetary Science Letters, 536, p.116140.	callen\060215\e2	callen\060215\e2-144	53.9222	8.72222							276.424				688.478					2038.37				9.51192			5.57106	0.731758			177.304					112.583					697.437	0	697.437	#DIV/0!	22.2305	24.773
Europe	Germany	Fehrman Island	Zhu et al., 2020, Earth and Planetary Science Letters, 536, p.116140.	callen\051012\e5	callen\051012\e5-050	53.9222	8.72222							276.612				236.636					1244.5				19.1941			9.12628	1.17924			126.698					66.2006					206.451	0	206.451	#DIV/0!	7.64083	15.3623
Europe	Germany	Fehrman Island	Zhu et al., 2020, Earth and Planetary Science Letters, 536, p.116140.	callen\051012\e5	callen\051012\e5-099	53.9222	8.72222							276.886				126.947					1276.26				66.8131			3.89016	1.39381			106.906					70.2841					74.5083	0	74.5083	#DIV/0!	4.09902	15.9276
Europe	Poland	Vistula River	Zhu et al., 2020, Earth and Planetary Science Letters, 536, p.116140.	ziyi zhu\180501\Vis2	ziyi zhu\180501\Vis2-083	54.3587	18.9465							277				451					2320			0.526	95.7		24.5		5.46			254					93.1					132	0	132	#DIV/0!	14.5625	29.0845
Europe	Germany	Fehrman Island	Zhu et al., 2020, Earth and Planetary Science Letters, 536, p.116140.	callen\051012\e5	callen\051012\e5-002	53.9222	8.72222							277.038				609.943					2307.09			0.369923	18.8221			20.9675	1.95734			237.289					89.6559					196.506	0	196.506	#DIV/0!	19.6947	28.2134
Europe	Italy	Po River	Zhu et al., 2020, Earth and Planetary Science Letters, 536, p.116140.	callen\041216\po	callen\041216\po-005	44.9525	12.4319							277.112				266.46					617.858				4.58629		2.09512	3.90992	0.579818			61.4347					33.696					55.52	0	55.52	#DIV/0!	8.60382	7.59772
Europe	Germany	Fehrman Island	Zhu et al., 2020, Earth and Planetary Science Letters, 536, p.116140.	callen\051012\e5	callen\051012\e5-105	53.9222	8.72222							277.703				210.507					1798.12				62.9531			10.8171	2.84294			187.922					78.2518					120.405	0	120.405	#DIV/0!	6.79711	22.3699
Europe	Germany	Fehrman Island	Zhu et al., 2020, Earth and Planetary Science Letters, 536, p.116140.	callen\051012\e5	callen\051012\e5-049	53.9222	8.72222							277.716				341.265					689.051				15.1103			4.64886	0.666387			70.7473					36.7035					85.425	0	85.425	#DIV/0!	11.0192	8.53911
Europe	Germany	Fehrman Island	Zhu et al., 2020, Earth and Planetary Science Letters, 536, p.116140.	callen\051012\e5	callen\051012\e5-010	53.9222	8.72222							277.985				188.077					1820.53			0.0721413	70.541			14.2702	4.06282			180.051					75.134					70.7978	0	70.7978	#DIV/0!	6.07287	22.6414
Europe	Germany	Fehrman Island	Zhu et al., 2020, Earth and Planetary Science Letters, 536, p.116140.	callen\051012\e5	callen\051012\e5-121	53.9222	8.72222							278.137				107.642					205.408			0.0424803	6.85814			0.944464	0.147764			19.1079					15.117					86.3374	0	86.3374	#DIV/0!	3.47568	2.57104
Europe	Italy	Po River	Zhu et al., 2020, Earth and Planetary Science Letters, 536, p.116140.	callen\041216\po	callen\041216\po-066	44.9525	12.4319							278.517				326.646					958.045				13.0874		3.09145	5.46332	0.474308			94.4403					48.9076					189.882	0	189.882	#DIV/0!	10.5472	11.7916
Europe	Germany	Fehrman Island	Zhu et al., 2020, Earth and Planetary Science Letters, 536, p.116140.	callen\051012\e5	callen\051012\e5-013	53.9222	8.72222							278.844				160.118					352.64				7.69037			1.91803	0.219297			33.4513					20.8659					44.2265	0	44.2265	#DIV/0!	5.17011	4.36088
Europe	Italy	Po River	Zhu et al., 2020, Earth and Planetary Science Letters, 536, p.116140.	callen\041216\po	callen\041216\po-111	44.9525	12.4319							279.464				560.818					3942.59			0.105027	25.6166		17.7207	31.9457	7.5536			409.79					171.646					390.623	0	390.623	#DIV/0!	18.1084	48.4198
Europe	Germany	Fehrman Island	Zhu et al., 2020, Earth and Planetary Science Letters, 536, p.116140.	callen\051012\e5	callen\051012\e5-111	53.9222	8.72222							279.541				261.002					480.106				8.87291			2.60257	0.321887			46.826					27.9896					70.7114	0	70.7114	#DIV/0!	8.42756	5.93138
Europe	Poland	Oder River	Zhu et al., 2020, Earth and Planetary Science Letters, 536, p.116140.	CALLEN\060223\E3	CALLEN\060223\E3-173	53.9222	8.72222							279.564				636.964					2868.96				72.6062			17.3969	6.28292			321.672					99.4838					80.0072	0	80.0072	#DIV/0!	20.5671	35.495
Europe	Italy	Po River	Zhu et al., 2020, Earth and Planetary Science Letters, 536, p.116140.	callen\041216\po	callen\041216\po-100	44.9525	12.4319							279.582				220.86					738.135			0.13153	15.0811		2.76665	4.21179				73.9994					38.8777					224.184	0	224.184	#DIV/0!	7.13143	9.1363
Europe	Germany	Fehrman Island	Zhu et al., 2020, Earth and Planetary Science Letters, 536, p.116140.	callen\051012\e5	callen\051012\e5-025	53.9222	8.72222							279.643				282.564					549.09				8.17049			3.37046	0.416522			54.3412					28.9325					65.171	0	65.171	#DIV/0!	9.1238	6.75969
Europe	Germany	Fehrman Island	Zhu et al., 2020, Earth and Planetary Science Letters, 536, p.116140.	callen\051012\e5	callen\051012\e5-083	53.9222	8.72222							279.833				270.729					798.243				8.14799			6.00928	0.686811			84.535					38.3848					68.0352	0	68.0352	#DIV/0!	8.74165	9.8213
Europe	Portugal	Tagus River	Zhu et al., 2020, Earth and Planetary Science Letters, 536, p.116140.	ziyi zhu\180928\Tag2	ziyi zhu\180928\Tag2-020	38.9227	-8.99893							279.88				428					495.6			0.052	1.34		0.59	1.01	0.078			40.12					38					888	0	888	#DIV/0!	13.8198	6.0601
Europe	Italy	Po River	Zhu et al., 2020, Earth and Planetary Science Letters, 536, p.116140.	callen\041216\po	callen\041216\po-096	44.9525	12.4319							280.088				317.936					1277.68				34.5831		8.611	12.6818	0.36234			141.62					58.8222					276.875	0	276.875	#DIV/0!	10.266	15.973
Europe	Germany	Fehrman Island	Zhu et al., 2020, Earth and Planetary Science Letters, 536, p.116140.	callen\051012\e5	callen\051012\e5-115	53.9222	8.72222							280.156				494.875					1907.06				81.9312			6.53363	2.33276			171.305					95.7391					160.065	0	160.065	#DIV/0!	15.9792	23.6965
Europe	Germany	Elbe River	Zhu et al., 2020, Earth and Planetary Science Letters, 536, p.116140.	ziyi zhu\180430\Elbe	ziyi zhu\180430\Elbe-027	53.831	8.82492							280.3				357					1231			0.0126	48.2		2.12		1.86			111.1					65.3					69.3	0	69.3	#DIV/0!	11.5273	15.2749
Europe	Germany	Fehrman Island	Zhu et al., 2020, Earth and Planetary Science Letters, 536, p.116140.	callen\051012\e5	callen\051012\e5-104	53.9222	8.72222							280.338				328.374					1145.25			0.362567	15.614			14.624	1.79958			128.093					50.5897					82.2577	0	82.2577	#DIV/0!	10.603	14.1829
Europe	Hungary	Danube River	Zhu et al., 2020, Earth and Planetary Science Letters, 536, p.116140.	wang yan\070110\e2	wang yan\070110\e2-05	53.9222	8.72222							280.707				562.107					2643.66				12.7907			4.84161	0.345914			229.644					148.172					2501.45	0	2501.45	#DIV/0!	18.15	32.1231
Europe	Italy	Po River	Zhu et al., 2020, Earth and Planetary Science Letters, 536, p.116140.	callen\041216\po	callen\041216\po-077	44.9525	12.4319							280.757				457.415					615.485				1.62712		1.90456	6.47284	0.202643			78.548					15.0628					407.63	0	407.63	#DIV/0!	14.7696	7.56198
Europe	Poland	Vistula River	Zhu et al., 2020, Earth and Planetary Science Letters, 536, p.116140.	ziyi zhu\180501\Vis1	ziyi zhu\180501\Vis1-081	54.3587	18.9465							280.9				337.2					1310			0.067	40.9		4.57		0.588			124					77.9					460	0	460	#DIV/0!	10.888	16.2719
Europe	Italy	Po River	Zhu et al., 2020, Earth and Planetary Science Letters, 536, p.116140.	callen\041216\po	callen\041216\po-139	44.9525	12.4319							281.21				191.533					210.723				1.39764		0.685453	1.35951	0.14817			22.141					7.16875					167.341	0	167.341	#DIV/0!	6.18446	2.5723
Europe	Italy	Po River	Zhu et al., 2020, Earth and Planetary Science Letters, 536, p.116140.	callen\041216\po	callen\041216\po-024	44.9525	12.4319							281.27				251.903					283.797				2.28208		4.75257	10.8547	0.716042			58.1145					0.840124					117.693	0	117.693	#DIV/0!	8.13379	3.68088
Europe	Germany	Fehrman Island	Zhu et al., 2020, Earth and Planetary Science Letters, 536, p.116140.	callen\051012\e5	callen\051012\e5-005	53.9222	8.72222							281.427				287.129					1352.83			0.103585	14.7437			11.9319	0.905226			136.763					57.5215					139.767	0	139.767	#DIV/0!	9.27119	16.579
Europe	Hungary	Danube River	Zhu et al., 2020, Earth and Planetary Science Letters, 536, p.116140.	wang yan\070110\e2	wang yan\070110\e2-03	53.9222	8.72222							281.809				233.116					1339.6				17.1197			3.65062	0.837339			98.1505					115.378					692.348	0	692.348	#DIV/0!	7.52716	16.4839
Europe	Italy	Po River	Zhu et al., 2020, Earth and Planetary Science Letters, 536, p.116140.	callen\041216\po	callen\041216\po-138	44.9525	12.4319							281.814				200.216					634.622				10.1131		0.555994	1.38155	0.260338			52.3086					41.6767					421	0	421	#DIV/0!	6.46485	7.7856
Europe	Germany	Fehrman Island	Zhu et al., 2020, Earth and Planetary Science Letters, 536, p.116140.	callen\051012\e5	callen\051012\e5-095	53.9222	8.72222							281.982				274.212					816.528				13.8353			5.80686	0.635629			85.9802					41.8789					97.9315	0	97.9315	#DIV/0!	8.85413	10.0948
Europe	Hungary	Danube River	Zhu et al., 2020, Earth and Planetary Science Letters, 536, p.116140.	callen\060215\e2	callen\060215\e2-001	53.9222	8.72222							282.369				192.024					1009.45			0.0293886	9.30176			1.77192	0.23559			63.1289					84.8368					835.976	0	835.976	#DIV/0!	6.20032	12.3081
Europe	Italy	Po River	Zhu et al., 2020, Earth and Planetary Science Letters, 536, p.116140.	wang yan\070105\po	wang yan\070105\po-175	44.9525	12.4319							282.391				304.694								0.0438671	14.4554			2.79338	0.245113			77.1546					42.0444					216.654	0	216.654	#DIV/0!	9.83837	0.838732
Europe	Italy	Po River	Zhu et al., 2020, Earth and Planetary Science Letters, 536, p.116140.	wang yan\070105\po	wang yan\070105\po-174	44.9525	12.4319							282.676				264.213									18.8965			3.09484	0.611535			78.7553					55.7975					352.996	0	352.996	#DIV/0!	8.53126	0.96297
Europe	Germany	Fehrman Island	Zhu et al., 2020, Earth and Planetary Science Letters, 536, p.116140.	callen\051012\e5	callen\051012\e5-090	53.9222	8.72222							282.797				283.277					1041.2			0.0724634	14.8596			9.133	0.988914			112.088					48.816					111.878	0	111.878	#DIV/0!	9.14682	12.8545
Europe	France	Rhone River	Zhu et al., 2020, Earth and Planetary Science Letters, 536, p.116140.	wang yan\061213\e12	wang yan\061213\e12-186	53.9222	8.72222							282.882				294.651					1825.4			0.172869	21.287			8.27519	1.80057			172.644					92.6892					699.116	0	699.116	#DIV/0!	9.51409	22.3453
Europe	Germany	Fehrman Island	Zhu et al., 2020, Earth and Planetary Science Letters, 536, p.116140.	callen\051012\e5	callen\051012\e5-117	53.9222	8.72222							282.956				266.426					761.785				8.84613			5.69011	0.738673			80.9208					38.4266					56.1468	0	56.1468	#DIV/0!	8.60272	9.3924
Europe	Italy	Po River	Zhu et al., 2020, Earth and Planetary Science Letters, 536, p.116140.	wang yan\070105\po	wang yan\070105\po-167	44.9525	12.4319							283.085				216.232									4.33783			3.79641	0.580539			62.1109					31.5161					47.9607	0	47.9607	#DIV/0!	6.982	0.622337
Europe	Germany	Fehrman Island	Zhu et al., 2020, Earth and Planetary Science Letters, 536, p.116140.	callen\051012\e5	callen\051012\e5-006	53.9222	8.72222							283.168				182.639					867.904			0.0872828	12.7403			5.84069	0.665341			83.2486					40.8211					104.986	0	104.986	#DIV/0!	5.89729	10.643
Europe	Germany	Fehrman Island	Zhu et al., 2020, Earth and Planetary Science Letters, 536, p.116140.	callen\051012\e5	callen\051012\e5-103	53.9222	8.72222							283.515				275.515					925.962				11.1774			8.85608	1.15856			100.651					43.4416					65.1233	0	65.1233	#DIV/0!	8.8962	11.4297
Europe	Germany	Fehrman Island	Zhu et al., 2020, Earth and Planetary Science Letters, 536, p.116140.	callen\051012\e5	callen\051012\e5-004	53.9222	8.72222							283.528				372.835					2201.25			0.320391	20.9553			16.8031	1.75441			220.786					95.0746					386.554	0	386.554	#DIV/0!	12.0386	26.9381
Europe	Germany	Fehrman Island	Zhu et al., 2020, Earth and Planetary Science Letters, 536, p.116140.	callen\051012\e5	callen\051012\e5-020	53.9222	8.72222							283.538				286.22					541.993				8.93088			3.19994	0.516367			53.7241					29.2936					53.1673	0	53.1673	#DIV/0!	9.24185	6.68308
Europe	Italy	Po River	Zhu et al., 2020, Earth and Planetary Science Letters, 536, p.116140.	callen\041216\po	callen\041216\po-057	44.9525	12.4319							283.569				160.11					673.433				9.81538		4.49013	4.88949	1.96424			56.9441					51.5993					130.744	0	130.744	#DIV/0!	5.16985	8.36709
Europe	Italy	Po River	Zhu et al., 2020, Earth and Planetary Science Letters, 536, p.116140.	callen\041216\po	callen\041216\po-091	44.9525	12.4319							283.574				1022.4					2555.55			0.0930063	5.1615		8.27386	17.402	1.08075			273.471					104.203					391.204	0	391.204	#DIV/0!	33.0126	31.2424
Europe	Italy	Po River	Zhu et al., 2020, Earth and Planetary Science Letters, 536, p.116140.	callen\041216\po	callen\041216\po-137	44.9525	12.4319							284.009				121.824					412.984				5.59435		1.01864	1.40957	0.498813			35.5275					27.8105					134.946	0	134.946	#DIV/0!	3.93362	5.08269
Europe	Italy	Po River	Zhu et al., 2020, Earth and Planetary Science Letters, 536, p.116140.	callen\041216\po	callen\041216\po-032	44.9525	12.4319							284.092				303.548					1012.13				8.09014		0.920585	2.43181	0.283309			87.5087					59.6566					584.674	0	584.674	#DIV/0!	9.80136	12.3466
Europe	Germany	Fehrman Island	Zhu et al., 2020, Earth and Planetary Science Letters, 536, p.116140.	callen\051012\e5	callen\051012\e5-148	53.9222	8.72222							284.134				251.398					426.245				9.69411			2.33317	0.278858			41.1711					26.7669					63.142	0	63.142	#DIV/0!	8.11747	5.28751
Europe	Hungary	Danube River	Zhu et al., 2020, Earth and Planetary Science Letters, 536, p.116140.	callen\060215\e2	callen\060215\e2-011	53.9222	8.72222							284.347				261.826					872.174				11.3382			2.09871	0.416414			65.0743					65.1225					547.223	0	547.223	#DIV/0!	8.4542	10.6809
Europe	Germany	Fehrman Island	Zhu et al., 2020, Earth and Planetary Science Letters, 536, p.116140.	callen\051012\e5	callen\051012\e5-026	53.9222	8.72222							284.361				130.288					406.272				14.2907			1.52161	0.13888			34.9081					27.8386					183.356	0	183.356	#DIV/0!	4.20692	5.05692
Europe	France	Rhone River	Zhu et al., 2020, Earth and Planetary Science Letters, 536, p.116140.	wang yan\061213\e12	wang yan\061213\e12-081	53.9222	8.72222							284.387				427.931					2452.7				15.7674			5.83702	1.17857			201.948					142.396					612.982	0	612.982	#DIV/0!	13.8176	29.8049
Europe	Germany	Rhine River	Zhu et al., 2020, Earth and Planetary Science Letters, 536, p.116140.	callen\060609\e10	callen\060609\E10-115	53.9222	8.72222							284.493				271.059					1291.75			0.0941536	17.5902			6.58993	0.125145			114.007					54.4142					227.692	0	227.692	#DIV/0!	8.7523	15.7138
Europe	Germany	Fehrman Island	Zhu et al., 2020, Earth and Planetary Science Letters, 536, p.116140.	callen\051012\e5	callen\051012\e5-096	53.9222	8.72222							284.649				202.039					343.958				8.14428			1.79123	0.149656			32.5335					20.9215					67.3516	0	67.3516	#DIV/0!	6.52369	4.25983
Europe	Germany	Fehrman Island	Zhu et al., 2020, Earth and Planetary Science Letters, 536, p.116140.	callen\051012\e5	callen\051012\e5-118	53.9222	8.72222							284.955				111.05					258.146				6.36946			1.35894				25.5387					15.2901					130.375	0	130.375	#DIV/0!	3.58573	3.20281
Europe	Portugal	Tagus River	Zhu et al., 2020, Earth and Planetary Science Letters, 536, p.116140.	ziyi zhu\180928\Tag2	ziyi zhu\180929\Tag2-099	38.9227	-8.99893							284.986				421					1876			0.69	11.3		5.82	7.2	0.82			164.3					106.2					1230	0	1230	#DIV/0!	13.5938	22.8995
Europe	Germany	Fehrman Island	Zhu et al., 2020, Earth and Planetary Science Letters, 536, p.116140.	callen\051012\e5	callen\051012\e5-131	53.9222	8.72222							285.105				265.045					504.221				8.90618			3.03496	0.282374			50.885					28.1048					76.1025	0	76.1025	#DIV/0!	8.55813	6.23112
Europe	Germany	Fehrman Island	Zhu et al., 2020, Earth and Planetary Science Letters, 536, p.116140.	callen\051012\e5	callen\051012\e5-133	53.9222	8.72222							285.243				214.27					1484.69			0.0994708	66.4355			16.3025	3.8801			165.958					60.1962					44.6632	0	44.6632	#DIV/0!	6.91864	18.6748
Europe	Hungary	Danube River	Zhu et al., 2020, Earth and Planetary Science Letters, 536, p.116140.	wang yan\070110\e2	wang yan\070110\E2-41	53.9222	8.72222							285.283				295.122					1257.98			0.143993	9.56249			3.85152	0.456469			100.21					94.622					947.504	0	947.504	#DIV/0!	9.52929	15.4058
Europe	Germany	Fehrman Island	Zhu et al., 2020, Earth and Planetary Science Letters, 536, p.116140.	callen\051012\e5	callen\051012\e5-147	53.9222	8.72222							285.481				345.943					591.67				14.3478			4.52337	1.18745			61.0776					36.5436					36.3619	0	36.3619	#DIV/0!	11.1703	7.38044
Europe	Germany	Elbe River	Zhu et al., 2020, Earth and Planetary Science Letters, 536, p.116140.	ziyi zhu\180430\Elbe	ziyi zhu\180430\Elbe-013	53.831	8.82492							285.763				219.4					416			0.111	9.01		1.65		0.817			32.6					36.02					122.7	0	122.7	#DIV/0!	7.08428	5.16779
Europe	France	Rhone River	Zhu et al., 2020, Earth and Planetary Science Letters, 536, p.116140.	wang yan\061213\e12	wang yan\061213\e12-118	53.9222	8.72222							285.79				493.584					2159.07				46.6318			5.53111	1.11641			163.9					165.617					1512.1	0	1512.1	#DIV/0!	15.9375	26.6185
Europe	Germany	Fehrman Island	Zhu et al., 2020, Earth and Planetary Science Letters, 536, p.116140.	callen\051012\e5	callen\051012\e5-108	53.9222	8.72222							286.444				263.944					949.318				10.207			6.79408	0.571222			99.857					45.4451					99.1389	0	99.1389	#DIV/0!	8.52257	11.6745
Europe	Hungary	Danube River	Zhu et al., 2020, Earth and Planetary Science Letters, 536, p.116140.	callen\060215\e2	callen\060215\e2-004	53.9222	8.72222							286.456				803.369					3238.15			0.362018	13.9341			14.2949	2.01727			312.344					137.252					464.074	0	464.074	#DIV/0!	25.9402	39.3414
Europe	Italy	Po River	Zhu et al., 2020, Earth and Planetary Science Letters, 536, p.116140.	wang yan\070105\po	wang yan\070105\po-192	44.9525	12.4319							286.631				1117.77								0.996233	58.6107			18.285	3.59625			386.56					353.494					2329.64	0	2329.64	#DIV/0!	36.092	4.96955
Europe	Germany	Rhine River	Zhu et al., 2020, Earth and Planetary Science Letters, 536, p.116140.	callen\060609\e10	callen\060609\E10-133	53.9222	8.72222							286.636				179.879					2842.26			0.0834334	18.4656			16.2157	2.28414			274.19					108.733					351.343	0	351.343	#DIV/0!	5.80817	34.5353
Europe	Italy	Po River	Zhu et al., 2020, Earth and Planetary Science Letters, 536, p.116140.	wang yan\070105\po	wang yan\070105\po-182	44.9525	12.4319							286.756				234.106									14.2699			2.48272	0.541295			62.919					52.6287					328.877	0	328.877	#DIV/0!	7.55911	0.809853
Europe	Italy	Po River	Zhu et al., 2020, Earth and Planetary Science Letters, 536, p.116140.	wang yan\070105\po	wang yan\070105\po-180	44.9525	12.4319							286.81				159.032									6.24199			1.04049	0.260362			32.2837					30.6285					141.362	0	141.362	#DIV/0!	5.13503	0.426873
Europe	Germany	Rhine River	Zhu et al., 2020, Earth and Planetary Science Letters, 536, p.116140.	callen\060609\e10	callen\060609\e10-108	53.9222	8.72222							287.143				126.688					356.257			0.0336687	7.16696			0.984778	0.325526			26.3459					30.4817					110.113	0	110.113	#DIV/0!	4.09066	4.40379
Europe	Italy	Po River	Zhu et al., 2020, Earth and Planetary Science Letters, 536, p.116140.	callen\041216\po	callen\041216\po-129	44.9525	12.4319							287.336				769.992					1462.24			0.0586304	3.27953		1.42674	5.30845				144.338					64.7001					1028.64	0	1028.64	#DIV/0!	24.8625	17.7751
Europe	Italy	Po River	Zhu et al., 2020, Earth and Planetary Science Letters, 536, p.116140.	wang yan\070105\po	wang yan\070105\po-190	44.9525	12.4319							287.748				187.61								0.0739825	13.3146			14.6251	0.935435			249.578					98.5366					359.023	0	359.023	#DIV/0!	6.05779	2.29789
Europe	Italy	Po River	Zhu et al., 2020, Earth and Planetary Science Letters, 536, p.116140.	callen\041216\po	callen\041216\po-046	44.9525	12.4319							287.922				215.006					982.527				10.2363		2.11172	4.18581	1.12627			85.6913					63.662					324.478	0	324.478	#DIV/0!	6.94238	12.0661
Europe	Italy	Po River	Zhu et al., 2020, Earth and Planetary Science Letters, 536, p.116140.	callen\041216\po	callen\041216\po-075	44.9525	12.4319							288.126				198.553					882.74			0.0643799	10.3869		0.665433	1.92495	0.299941			69.6886					60.2659					390.532	0	390.532	#DIV/0!	6.41113	10.7968
Europe	Italy	Po River	Zhu et al., 2020, Earth and Planetary Science Letters, 536, p.116140.	wang yan\070105\po	wang yan\070105\po-196	44.9525	12.4319							288.515				167.745								0.0479755	1.66074			3.34832	0.533068			62.6108					57.2628					241.406	0	241.406	#DIV/0!	5.41638	0.750482
Europe	Germany	Fehrman Island	Zhu et al., 2020, Earth and Planetary Science Letters, 536, p.116140.	callen\051012\e5	callen\051012\e5-140	53.9222	8.72222							288.86				405.686					949.36				50.0209			7.10375	1.62711			92.6265					53.582					62.0588	0	62.0588	#DIV/0!	13.0993	11.9701
Europe	Germany	Fehrman Island	Zhu et al., 2020, Earth and Planetary Science Letters, 536, p.116140.	callen\051012\e5	callen\051012\e5-120	53.9222	8.72222							289.413				420.232					1717.08			0.320457	24.792			17.0269	1.46662			181.274					75.4535					250.796	0	250.796	#DIV/0!	13.569	21.1635
Europe	Portugal	Tagus River	Zhu et al., 2020, Earth and Planetary Science Letters, 536, p.116140.	ziyi zhu\180928\Tag2	ziyi zhu\180929\Tag2-093	38.9227	-8.99893							289.8				831					1738			0.249	15.76		3.23	5.9	0.446			153.7					89.4					482.6	0	482.6	#DIV/0!	26.8324	21.1856
Europe	Germany	Fehrman Island	Zhu et al., 2020, Earth and Planetary Science Letters, 536, p.116140.	callen\051012\e5	callen\051012\e5-098	53.9222	8.72222							290.147				368.72					1034.47			0.0602323	32.2953			6.23428	0.307615			101.66					60.3858					564.556	0	564.556	#DIV/0!	11.9057	12.8814
Europe	Italy	Po River	Zhu et al., 2020, Earth and Planetary Science Letters, 536, p.116140.	callen\041216\po	callen\041216\po-093	44.9525	12.4319							290.147				245.332					945.493				11.7563		0.647387	1.90528	0.29024			75.1761					61.6937					719.409	0	719.409	#DIV/0!	7.92161	11.5536
Europe	Poland	Oder River	Zhu et al., 2020, Earth and Planetary Science Letters, 536, p.116140.	CALLEN\060223\E3	CALLEN\060223\E3-179	53.9222	8.72222							290.244				340.93					782.98				10.1744			4.41922	0.693662			79.8541					43.6794					134.789	0	134.789	#DIV/0!	11.0084	9.655
Europe	Italy	Po River	Zhu et al., 2020, Earth and Planetary Science Letters, 536, p.116140.	wang yan\070105\po	wang yan\070105\po-161	44.9525	12.4319							290.438				247.904									9.98771			1.73516	0.214377			82.0762					67.5318					597.167	0	597.167	#DIV/0!	8.00463	0.975218
Europe	Germany	Rhine River	Zhu et al., 2020, Earth and Planetary Science Letters, 536, p.116140.	callen\060609\e10	callen\060609\e10-064	53.9222	8.72222							290.517				354.096					1275.11			0.0439856	14.0899			4.22466	0.732357			104.695					82.3886					304.09	0	304.09	#DIV/0!	11.4335	15.5921
Europe	Italy	Po River	Zhu et al., 2020, Earth and Planetary Science Letters, 536, p.116140.	callen\041216\po	callen\041216\po-136	44.9525	12.4319							290.994				234.573					971.427				10.3148		1.08825	2.37782	0.457747			75.8814					67.0761					345.368	0	345.368	#DIV/0!	7.57421	11.8774
Europe	Italy	Po River	Zhu et al., 2020, Earth and Planetary Science Letters, 536, p.116140.	callen\041216\po	callen\041216\po-110	44.9525	12.4319							291.015				434.661					1943.38			0.109182	32.2207		6.61052	10.511	4.18717			170.267					122.817					390.881	0	390.881	#DIV/0!	14.0349	23.984
Europe	Italy	Po River	Zhu et al., 2020, Earth and Planetary Science Letters, 536, p.116140.	callen\041216\po	callen\041216\po-047	44.9525	12.4319							291.078				298.951					1357.24			0.209265	20.4051		1.02504	2.29666	0.34465			95.705					111.786					1132.42	0	1132.42	#DIV/0!	9.65293	16.6666
Europe	Portugal	Tagus River	Zhu et al., 2020, Earth and Planetary Science Letters, 536, p.116140.	ziyi zhu\180928\Tag2	ziyi zhu\180929\Tag2-110	38.9227	-8.99893							291.143				719					1290			0.403	14.8		8.5	12.3	0.53			147					45.7					465	0	465	#DIV/0!	23.216	15.9292
Europe	Hungary	Danube River	Zhu et al., 2020, Earth and Planetary Science Letters, 536, p.116140.	callen\060215\e2	callen\060215\e2-078	53.9222	8.72222							291.186				400.452					1251.35				11.0801			3.76894	0.695722			102.584					84.7582					520.37	0	520.37	#DIV/0!	12.9303	15.3002
Europe	Italy	Po River	Zhu et al., 2020, Earth and Planetary Science Letters, 536, p.116140.	callen\041216\po	callen\041216\po-080	44.9525	12.4319							291.354				494.461					905.987			0.0683012	2.20527		0.558677	1.6244				68.5048					68.8637					464.748	0	464.748	#DIV/0!	15.9658	11.0371
Europe	Italy	Po River	Zhu et al., 2020, Earth and Planetary Science Letters, 536, p.116140.	callen\041216\po	callen\041216\po-052	44.9525	12.4319							291.55				290.338					1148.9			0.0581117	12.7008		1.20082	2.62778	0.44366			95.7693					74.2114					307.392	0	307.392	#DIV/0!	9.37481	14.0567
Europe	Portugal	Tagus River	Zhu et al., 2020, Earth and Planetary Science Letters, 536, p.116140.	ziyi zhu\180928\Tag2	ziyi zhu\180928\Tag2-039	38.9227	-8.99893							292.157				345					1434			0.0079	9.24		1.13	3.25	0.271			114.4					92.7					808	0	808	#DIV/0!	11.1398	17.4614
Europe	Germany	Fehrman Island	Zhu et al., 2020, Earth and Planetary Science Letters, 536, p.116140.	callen\051012\e5	callen\051012\e5-037	53.9222	8.72222							292.212				111.332					1696.33			0.230562	12.951			18.4591	1.02892			184.973					80.1979					298.921	0	298.921	#DIV/0!	3.59484	20.9015
Europe	Italy	Po River	Zhu et al., 2020, Earth and Planetary Science Letters, 536, p.116140.	wang yan\070105\po	wang yan\070105\po-201	44.9525	12.4319							292.33				883.946								0.044978	19.6832			10.3114	0.758172			282.79					141.521					1153.93	0	1153.93	#DIV/0!	28.542	2.7633
Europe	Hungary	Danube River	Zhu et al., 2020, Earth and Planetary Science Letters, 536, p.116140.	callen\060215\e2	callen\060215\e2-127	53.9222	8.72222							292.818				166.7					590.866				9.79044			1.4109	0.266611			44.5616					50.9542					404.422	0	404.422	#DIV/0!	5.38262	7.29282
Europe	Portugal	Tagus River	Zhu et al., 2020, Earth and Planetary Science Letters, 536, p.116140.	ziyi zhu\180928\Tag2	ziyi zhu\180928\Tag2-028	38.9227	-8.99893							292.9				729					1513			0.057	8.95		1.56	4.33	0.401			126.5					90.2					632.1	0	632.1	#DIV/0!	23.5389	18.4196
Europe	Germany	Fehrman Island	Zhu et al., 2020, Earth and Planetary Science Letters, 536, p.116140.	callen\051012\e5	callen\051012\e5-084	53.9222	8.72222							293.132				135.539					235.656				3.84324			1.65214	0.579118			22.0932					19.1662					220.004	0	220.004	#DIV/0!	4.37647	2.93851
Europe	Germany	Fehrman Island	Zhu et al., 2020, Earth and Planetary Science Letters, 536, p.116140.	callen\051012\e5	callen\051012\e5-073	53.9222	8.72222							293.614				375.155					709.183			0.0868623	11.9653			6.51427	0.646013			74.1674					35.2023					169.605	0	169.605	#DIV/0!	12.1135	8.76848
Europe	Hungary	Danube River	Zhu et al., 2020, Earth and Planetary Science Letters, 536, p.116140.	callen\060215\e2	callen\060215\e2-067	53.9222	8.72222							293.622				471.913					3082.41			0.827374	24.5261			7.35809	0.458023			276.725					150.181					2654.22	0	2654.22	#DIV/0!	15.2378	37.4669
Europe	Germany	Fehrman Island	Zhu et al., 2020, Earth and Planetary Science Letters, 536, p.116140.	callen\051012\e5	callen\051012\e5-134	53.9222	8.72222							293.676				235.944					370.919				7.5731			1.84786	0.163921			34.9728					23.7665					74.3998	0	74.3998	#DIV/0!	7.61846	4.59076
Europe	Italy	Po River	Zhu et al., 2020, Earth and Planetary Science Letters, 536, p.116140.	callen\041216\po	callen\041216\po-042	44.9525	12.4319							293.747				361.819					1513.35				12.0211		2.19481	4.43608	0.83032			119.405					110.035					651.204	0	651.204	#DIV/0!	11.6829	18.5226
Europe	Portugal	Tagus River	Zhu et al., 2020, Earth and Planetary Science Letters, 536, p.116140.	ziyi zhu\180928\Tag2	ziyi zhu\180929\Tag2-119	38.9227	-8.99893							293.8				626					987			0.103	1.3		1.65	3.25	0.097			89.5					59.7					496.1	0	496.1	#DIV/0!	20.2131	12.038
Europe	Germany	Fehrman Island	Zhu et al., 2020, Earth and Planetary Science Letters, 536, p.116140.	callen\051012\e5	callen\051012\e5-124	53.9222	8.72222							293.847				148.365					1172.41				82.673			6.67904	2.13686			112.224					63.0407					86.2458	0	86.2458	#DIV/0!	4.79061	14.8874
Europe	Italy	Po River	Zhu et al., 2020, Earth and Planetary Science Letters, 536, p.116140.	wang yan\070105\po	wang yan\070105\po-169	44.9525	12.4319							294				340.114									15.0044			3.41581	0.378755			114.019					83.3582					689.871	0	689.871	#DIV/0!	10.9821	1.31029
Europe	Portugal	Tagus River	Zhu et al., 2020, Earth and Planetary Science Letters, 536, p.116140.	ziyi zhu\180928\Tag2	ziyi zhu\180928\Tag2-043	38.9227	-8.99893							294.522				1189					1948			0.102	3		5.04	9.61	0.268			186.1					91.3					372	0	372	#DIV/0!	38.392	23.702
Europe	Hungary	Danube River	Zhu et al., 2020, Earth and Planetary Science Letters, 536, p.116140.	wang yan\070110\e2	wang yan\070110\E2-22	53.9222	8.72222							294.993				121.363					695.906			0.0400201	6.16394			1.39557	0.236261			50.0279					55.4351					488.343	0	488.343	#DIV/0!	3.91872	8.50772
Europe	Germany	Fehrman Island	Zhu et al., 2020, Earth and Planetary Science Letters, 536, p.116140.	callen\051012\e5	callen\051012\e5-130	53.9222	8.72222							295.45				193.674					1189.05			0.171117	6.99629			11.2522	1.35139			128.186					57.24					186.285	0	186.285	#DIV/0!	6.25359	14.6259
Europe	Hungary	Danube River	Zhu et al., 2020, Earth and Planetary Science Letters, 536, p.116140.	callen\060215\e2	callen\060215\e2-073	53.9222	8.72222							295.935				245.971					925.845				8.93794			3.06826	0.955366			74.705					70.9843					369.159	0	369.159	#DIV/0!	7.94224	11.3703
Europe	Germany	Fehrman Island	Zhu et al., 2020, Earth and Planetary Science Letters, 536, p.116140.	callen\051012\e5	callen\051012\e5-030	53.9222	8.72222							295.962				141.48					541.971				11.3292			3.58166	0.348762			53.0161					29.4756					204.128	0	204.128	#DIV/0!	4.56829	6.69807
Europe	Portugal	Tagus River	Zhu et al., 2020, Earth and Planetary Science Letters, 536, p.116140.	ziyi zhu\180928\Tag2	ziyi zhu\180929\Tag2-068	38.9227	-8.99893							296.2				625					1014			0.75	38		11.3	14.7	1.05			125.3					34					319	0	319	#DIV/0!	20.1808	12.8311
Europe	Italy	Po River	Zhu et al., 2020, Earth and Planetary Science Letters, 536, p.116140.	wang yan\070105\po	wang yan\070105\po-165	44.9525	12.4319							296.454				294.846								0.0498674	17.4069			3.18312	0.519213			88.3606					72.5016					408.525	0	408.525	#DIV/0!	9.52038	1.10724
Europe	Italy	Po River	Zhu et al., 2020, Earth and Planetary Science Letters, 536, p.116140.	callen\041216\po	callen\041216\po-021	44.9525	12.4319							296.618				108.011					270.767				2.153		0.537989	1.00217	0.335853			21.2942					24.3388					526.757	0	526.757	#DIV/0!	3.4876	3.34384
Europe	Italy	Po River	Zhu et al., 2020, Earth and Planetary Science Letters, 536, p.116140.	wang yan\070105\po	wang yan\070105\po-199	44.9525	12.4319							296.619				247.762									0.556148			2.46116	0.250531			33.5887					3.62202					160.894	0	160.894	#DIV/0!	8.00005	0.249379
Europe	Germany	Fehrman Island	Zhu et al., 2020, Earth and Planetary Science Letters, 536, p.116140.	callen\051012\e5	callen\051012\e5-011	53.9222	8.72222							296.784				18.4408					728.174				10.3273			2.66702	0.423017			66.5283					36.428					173.579	0	173.579	#DIV/0!	0.595442	8.90273
Europe	Italy	Po River	Zhu et al., 2020, Earth and Planetary Science Letters, 536, p.116140.	callen\041216\po	callen\041216\po-011	44.9525	12.4319							297.146				213.842					427.258			0.0813308	11.2764		3.994	5.1094	0.351928			44.7501					23.9135					88.1423	0	88.1423	#DIV/0!	6.90482	5.36315
Europe	Portugal	Tagus River	Zhu et al., 2020, Earth and Planetary Science Letters, 536, p.116140.	ziyi zhu\180928\Tag2	ziyi zhu\180928\Tag2-015	38.9227	-8.99893							297.2				614					906			0.134	2.49		2.67	3.84	0.168			92.8					41.9					767	0	767	#DIV/0!	19.8256	11.0656
Europe	Portugal	Tagus River	Zhu et al., 2020, Earth and Planetary Science Letters, 536, p.116140.	ziyi zhu\180928\Tag2	ziyi zhu\180929\Tag2-103	38.9227	-8.99893							297.3				212.6					1315			0.0242	10.33		7.42	11.94	1.47			140.1					55.5					215	0	215	#DIV/0!	6.86471	16.1856
Europe	Portugal	Tagus River	Zhu et al., 2020, Earth and Planetary Science Letters, 536, p.116140.	ziyi zhu\180928\Tag2	ziyi zhu\180929\Tag2-108	38.9227	-8.99893							297.3				510					3170			0.421	17.93		10.5	18.5	2.01			320					138.1					609	0	609	#DIV/0!	16.4675	38.7565
Europe	Germany	Fehrman Island	Zhu et al., 2020, Earth and Planetary Science Letters, 536, p.116140.	callen\051012\e5	callen\051012\e5-029	53.9222	8.72222							297.411				39.8925					1014.2			0.122563	8.37218			10.3391	1.15371			113.343					43.0033					161.361	0	161.361	#DIV/0!	1.2881	12.4886
Europe	Portugal	Tagus River	Zhu et al., 2020, Earth and Planetary Science Letters, 536, p.116140.	ziyi zhu\180928\Tag2	ziyi zhu\180929\Tag2-061	38.9227	-8.99893							297.563				420					615				0.87		0.6	1.47	0.06			51					50.9					655	0	655	#DIV/0!	13.5615	7.54313
Europe	Germany	Rhine River	Zhu et al., 2020, Earth and Planetary Science Letters, 536, p.116140.	callen\060609\e10	callen\060609\e10-075	53.9222	8.72222							298.039				125.202					299.55			0.0636898	7.60238			1.27273	0.129498			23.8437					20.1048					194.482	0	194.482	#DIV/0!	4.0427	3.69516
Europe	Portugal	Tagus River	Zhu et al., 2020, Earth and Planetary Science Letters, 536, p.116140.	ziyi zhu\180928\Tag2	ziyi zhu\180929\Tag2-111	38.9227	-8.99893							298.325				562					708			0.168	1.35		2.06	4.05	0.265			78.8					23.5					366	0	366	#DIV/0!	18.1466	8.63702
Europe	Germany	Fehrman Island	Zhu et al., 2020, Earth and Planetary Science Letters, 536, p.116140.	callen\051012\e5	callen\051012\e5-067	53.9222	8.72222							298.771				438.013					2015.11			0.429774	18.7823			20.891	1.40946			222.632					70.7879					239.065	0	239.065	#DIV/0!	14.1431	24.727
Europe	Italy	Po River	Zhu et al., 2020, Earth and Planetary Science Letters, 536, p.116140.	callen\041216\po	callen\041216\po-121	44.9525	12.4319							299.436				250.84					957.231				14.1651		0.915063	2.54107	0.439584			75.2151					70.62					408.891	0	408.891	#DIV/0!	8.09944	11.7611
Europe	Portugal	Tagus River	Zhu et al., 2020, Earth and Planetary Science Letters, 536, p.116140.	ziyi zhu\180928\Tag2	ziyi zhu\180928\Tag2-045	38.9227	-8.99893							299.7				1453					2750			0.091	3.3		6.73	13.5	0.95			293					84.8					204	0	204	#DIV/0!	46.9164	33.3882
Europe	France	Rhone River	Zhu et al., 2020, Earth and Planetary Science Letters, 536, p.116140.	wang yan\061213\e12	wang yan\061213\e12-179	53.9222	8.72222							299.843				602.777					3164.31			0.15214	14.6118			8.18698	0.186989			312.637					136.439					1572.87	0	1572.87	#DIV/0!	19.4632	38.4586
Europe	Portugal	Tagus River	Zhu et al., 2020, Earth and Planetary Science Letters, 536, p.116140.	ziyi zhu\180928\Tag2	ziyi zhu\180928\Tag2-050	38.9227	-8.99893							299.958				887					2560			0.091	8.2		4.97	11	0.312			240					131.2					818	0	818	#DIV/0!	28.6406	31.1919
Europe	Italy	Po River	Zhu et al., 2020, Earth and Planetary Science Letters, 536, p.116140.	callen\041216\po	callen\041216\po-036	44.9525	12.4319							300.678				176.233					578.804				5.73143		0.789263	1.67678	0.485757			40.8898					49.5998					163.252	0	163.252	#DIV/0!	5.69043	7.10652
Europe	Germany	Fehrman Island	Zhu et al., 2020, Earth and Planetary Science Letters, 536, p.116140.	callen\051012\e5	callen\051012\e5-109	53.9222	8.72222							300.736				220.52					1124.52			0.361379	13.279			17.2653	1.22248			133.979					41.1064					99.9974	0	99.9974	#DIV/0!	7.12043	13.9289
Europe	Germany	Fehrman Island	Zhu et al., 2020, Earth and Planetary Science Letters, 536, p.116140.	callen\051012\e5	callen\051012\e5-128	53.9222	8.72222							300.994				181.394					1353.25			0.336623	16.5407			15.161	1.10552			145.737					54.4762					199.598	0	199.598	#DIV/0!	5.8571	16.6589
Europe	Italy	Po River	Zhu et al., 2020, Earth and Planetary Science Letters, 536, p.116140.	callen\041216\po	callen\041216\po-026	44.9525	12.4319							301.129				245.2					926.67			0.0975704	11.6296		0.697671	2.004	0.450402			70.2194					71.98					459.599	0	459.599	#DIV/0!	7.91734	11.372
Europe	Germany	Fehrman Island	Zhu et al., 2020, Earth and Planetary Science Letters, 536, p.116140.	callen\051012\e5	callen\051012\e5-135	53.9222	8.72222							301.341				159.347					606.086				9.70987			5.84714	0.456784			67.955					26.5072					69.9479	0	69.9479	#DIV/0!	5.14521	7.49846
Europe	Germany	Fehrman Island	Zhu et al., 2020, Earth and Planetary Science Letters, 536, p.116140.	callen\051012\e5	callen\051012\e5-019	53.9222	8.72222							301.487				35.5206					2337.32			0.0913462	18.5243			11.9356	1.28887			219.917					118.925					675.117	0	675.117	#DIV/0!	1.14694	28.5452
Europe	Hungary	Danube River	Zhu et al., 2020, Earth and Planetary Science Letters, 536, p.116140.	callen\060215\e2	callen\060215\e2-130	53.9222	8.72222							301.533				658.98					1141.27				2.57802			3.1025	0.535209			100.781					66.7829					374.906	0	374.906	#DIV/0!	21.278	13.8821
Europe	Germany	Fehrman Island	Zhu et al., 2020, Earth and Planetary Science Letters, 536, p.116140.	callen\051012\e5	callen\051012\e5-136	53.9222	8.72222							302.873				162.95					452.307				12.0498			3.39742	0.45706			48.0548					24.573					96.5741	0	96.5741	#DIV/0!	5.26155	5.63556
Europe	France	Rhone River	Zhu et al., 2020, Earth and Planetary Science Letters, 536, p.116140.	wang yan\061213\e12	wang yan\061213\e12-086	53.9222	8.72222							303.04				221.125					744.676				23.4008			5.48496	0.734626			81.6622					32.4892					130.289	0	130.289	#DIV/0!	7.13996	9.27308
Europe	Italy	Po River	Zhu et al., 2020, Earth and Planetary Science Letters, 536, p.116140.	callen\041216\po	callen\041216\po-086	44.9525	12.4319							303.287				583.868					2336.42				6.65257		5.41891	11.2454	0.925527			228.444					106.665					289.961	0	289.961	#DIV/0!	18.8527	28.4627
Europe	Hungary	Danube River	Zhu et al., 2020, Earth and Planetary Science Letters, 536, p.116140.	callen\060215\e2	callen\060215\e2-088	53.9222	8.72222							303.543				649.616					1330.55			0.0503298	2.81304			6.99068	0.331408			130.44					65.4064					208.834	0	208.834	#DIV/0!	20.9757	16.2124
Europe	Germany	Rhine River	Zhu et al., 2020, Earth and Planetary Science Letters, 536, p.116140.	callen\060609\e10	callen\060609\e10-032	53.9222	8.72222							304.467				359.515					625.958				5.73713			1.91093	0.782073			49.8221					66.5043					304.035	0	304.035	#DIV/0!	11.6085	7.78657
Europe	Portugal	Tagus River	Zhu et al., 2020, Earth and Planetary Science Letters, 536, p.116140.	ziyi zhu\180928\Tag2	ziyi zhu\180929\Tag2-112	38.9227	-8.99893							304.693				777					2354			0.499	9.2		3.41	6.84	0.6			203.4					132.3					838	0	838	#DIV/0!	25.0888	28.6292
Europe	Italy	Po River	Zhu et al., 2020, Earth and Planetary Science Letters, 536, p.116140.	callen\041216\po	callen\041216\po-108	44.9525	12.4319							305.114				245.545					717.815			0.0830885	14.7327		0.96865	2.25192	0.444549			59.5695					49.1012					387.534	0	387.534	#DIV/0!	7.92849	8.85194
Europe	Germany	Rhine River	Zhu et al., 2020, Earth and Planetary Science Letters, 536, p.116140.	callen\060609\e10	callen\060609\e10-101	53.9222	8.72222							305.462				315.905					1305.48			0.0884019	23.4063			2.21237	0.354563			97.3646					98.7092					881.229	0	881.229	#DIV/0!	10.2004	16.0327
Europe	Hungary	Danube River	Zhu et al., 2020, Earth and Planetary Science Letters, 536, p.116140.	callen\060215\e2	callen\060215\e2-033-1	53.9222	8.72222							306.622				216.243					1499.5			0.198443	7.4525			7.5414	1.23128			162.047					79.4988					327.38	0	327.38	#DIV/0!	6.98235	18.4317
Europe	Portugal	Tagus River	Zhu et al., 2020, Earth and Planetary Science Letters, 536, p.116140.	ziyi zhu\180501\Tag1	ziyi zhu\180501\Tag1-021	38.9227	-8.99893							306.691				553					1178			0.0054	2.34		0.41		0.056			91.1					84.6					645	0	645	#DIV/0!	17.856	14.3148
Europe	France	Rhone River	Zhu et al., 2020, Earth and Planetary Science Letters, 536, p.116140.	wang yan\061213\e12	wang yan\061213\e12-197	53.9222	8.72222							307.153				396.385					1419.91				3.80889			11.1265	0.93436			151.426					65.3401					428.543	0	428.543	#DIV/0!	12.799	17.3846
Europe	France	Rhone River	Zhu et al., 2020, Earth and Planetary Science Letters, 536, p.116140.	wang yan\061213\e12	wang yan\061213\e12-087	53.9222	8.72222							307.52				39.5412					193.09				4.1306			1.42263	0.216135			16.4752					12.3427					399.666	0	399.666	#DIV/0!	1.27676	2.38427
Europe	France	Rhone River	Zhu et al., 2020, Earth and Planetary Science Letters, 536, p.116140.	wang yan\061213\e12	wang yan\061213\e12-199	53.9222	8.72222							307.603				429.134					946.279				4.3925			5.66099	0.419513			94.6848					49.0534					546.025	0	546.025	#DIV/0!	13.8564	11.579
Europe	Portugal	Tagus River	Zhu et al., 2020, Earth and Planetary Science Letters, 536, p.116140.	ziyi zhu\180501\Tag1	ziyi zhu\180501\Tag1-013	38.9227	-8.99893							307.818				754					1488			0.334	5.29		3.12		0.526			132.3					86.6					478	0	478	#DIV/0!	24.3461	18.1122
Europe	Portugal	Tagus River	Zhu et al., 2020, Earth and Planetary Science Letters, 536, p.116140.	ziyi zhu\180928\Tag2	ziyi zhu\180929\Tag2-056	38.9227	-8.99893							308.2				349					1010			0.021	2.58		1.47	3.16	0.144			88.2					63					614	0	614	#DIV/0!	11.269	12.3146
Europe	Portugal	Tagus River	Zhu et al., 2020, Earth and Planetary Science Letters, 536, p.116140.	ziyi zhu\180501\Tag1	ziyi zhu\180501\Tag1-009	38.9227	-8.99893							308.4				1335					2635			0.187	2.67		4.23		0.231			245.2					144.1					559	0	559	#DIV/0!	43.1062	32.0237
Europe	Portugal	Tagus River	Zhu et al., 2020, Earth and Planetary Science Letters, 536, p.116140.	ziyi zhu\180928\Tag2	ziyi zhu\180928\Tag2-011	38.9227	-8.99893							308.4				467					1589			0.0061	4.68		2.43	5.72	0.222			151.7					78.5					623	0	623	#DIV/0!	15.0791	19.3459
Europe	Portugal	Tagus River	Zhu et al., 2020, Earth and Planetary Science Letters, 536, p.116140.	ziyi zhu\180928\Tag2	ziyi zhu\180928\Tag2-006	38.9227	-8.99893							308.581				397					577			0.114	9		1.41	1.48	0.282			45.9					60.2					1352	0	1352	#DIV/0!	12.8189	7.20343
Europe	France	Rhone River	Zhu et al., 2020, Earth and Planetary Science Letters, 536, p.116140.	wang yan\061213\e12	wang yan\061213\e12-119	53.9222	8.72222							308.648				233.142					704.568				5.95779			4.62375	1.53518			67.3197					41.463					1403.38	0	1403.38	#DIV/0!	7.52801	8.65997
Europe	Portugal	Tagus River	Zhu et al., 2020, Earth and Planetary Science Letters, 536, p.116140.	ziyi zhu\180928\Tag2	ziyi zhu\180929\Tag2-064	38.9227	-8.99893							309.921				1019					2169			0.329	6.15		4.55	7.78	0.48			195.4					112					340	0	340	#DIV/0!	32.9028	26.3734
Europe	Germany	Rhine River	Zhu et al., 2020, Earth and Planetary Science Letters, 536, p.116140.	callen\060609\e10	callen\060609\e10-021	53.9222	8.72222							310.676				178.533					1155.86			0.04935	21.7739			9.38168	3.19213			122.56					76.3484					552.067	0	552.067	#DIV/0!	5.76471	14.4315
Europe	Portugal	Tagus River	Zhu et al., 2020, Earth and Planetary Science Letters, 536, p.116140.	ziyi zhu\180928\Tag2	ziyi zhu\180928\Tag2-005	38.9227	-8.99893							311.5				451					1825			0.0189	4.33		3.89	8.95	0.425			177.7					83.2					332	0	332	#DIV/0!	14.5625	22.218
Europe	Portugal	Tagus River	Zhu et al., 2020, Earth and Planetary Science Letters, 536, p.116140.	ziyi zhu\180928\Tag2	ziyi zhu\180928\Tag2-019	38.9227	-8.99893							311.5				1145					1877			0.085	3.44		2.62	5.82	0.176			163.7					105.8					526	0	526	#DIV/0!	36.9713	22.8088
Europe	Poland	Oder River	Zhu et al., 2020, Earth and Planetary Science Letters, 536, p.116140.	CALLEN\060223\E3	CALLEN\060223\E3-163	53.9222	8.72222							311.508				173.105					637.266				9.39051			1.42675	0.133746			56.8706					36.92					286.792	0	286.792	#DIV/0!	5.58945	7.80669
Europe	Portugal	Tagus River	Zhu et al., 2020, Earth and Planetary Science Letters, 536, p.116140.	ziyi zhu\180928\Tag2	ziyi zhu\180928\Tag2-031	38.9227	-8.99893							312.012				657					1464			0.017	2.42		2.25	5.9	0.166			139.1					69.9					216	0	216	#DIV/0!	21.2141	17.7967
Europe	Portugal	Tagus River	Zhu et al., 2020, Earth and Planetary Science Letters, 536, p.116140.	ziyi zhu\180928\Tag2	ziyi zhu\180929\Tag2-051	38.9227	-8.99893							312.022				849					2245			0.163	12.8		3.29	6.9	0.5			194.3					130.9					758	0	758	#DIV/0!	27.4136	27.3613
Europe	France	Rhone River	Zhu et al., 2020, Earth and Planetary Science Letters, 536, p.116140.	wang yan\061213\e12	wang yan\061213\e12-126	53.9222	8.72222							312.158				232.085					1146.36				13.1967			4.66493	0.315327			106.583					60.3061					286.512	0	286.512	#DIV/0!	7.49387	14.0227
Europe	Hungary	Danube River	Zhu et al., 2020, Earth and Planetary Science Letters, 536, p.116140.	callen\060215\e2	callen\060215\e2-138	53.9222	8.72222							312.623				503.505					1049.45				2.69889			7.02377	0.347527			105.404					49.7931					121.296	0	121.296	#DIV/0!	16.2578	12.8062
Europe	Portugal	Tagus River	Zhu et al., 2020, Earth and Planetary Science Letters, 536, p.116140.	ziyi zhu\180928\Tag2	ziyi zhu\180929\Tag2-052	38.9227	-8.99893							312.7				612					723			0.046	0.283		0.38	1.09	0.061			64.7					37.7					755	0	755	#DIV/0!	19.7611	8.75895
Europe	Portugal	Tagus River	Zhu et al., 2020, Earth and Planetary Science Letters, 536, p.116140.	ziyi zhu\180501\Tag1	ziyi zhu\180501\Tag1-010	38.9227	-8.99893							313.073				720					905			0.307	24		3.7		0.64			104.3					27.3					457	0	457	#DIV/0!	23.2483	11.1812
Europe	France	Rhone River	Zhu et al., 2020, Earth and Planetary Science Letters, 536, p.116140.	wang yan\061213\e12	wang yan\061213\e12-104	53.9222	8.72222							313.393				369.466					1713			0.260241	20.1001			6.47454	1.47495			148.126					95.3963					674.415	0	674.415	#DIV/0!	11.9298	20.9236
Europe	Portugal	Tagus River	Zhu et al., 2020, Earth and Planetary Science Letters, 536, p.116140.	ziyi zhu\180928\Tag2	ziyi zhu\180928\Tag2-008	38.9227	-8.99893							313.8				487					2220			0.3	9.55		6.34	11.33	1			222.7					96.8					498	0	498	#DIV/0!	15.7249	27.0917
Europe	Poland	Vistula River	Zhu et al., 2020, Earth and Planetary Science Letters, 536, p.116140.	ziyi zhu\180501\Vis1	ziyi zhu\180501\Vis1-051	54.3587	18.9465							314.217				287.3					768			0.0235	17.08		2.21		0.304			72.5					45					148.6	0	148.6	#DIV/0!	9.27672	9.48162
Europe	Portugal	Tagus River	Zhu et al., 2020, Earth and Planetary Science Letters, 536, p.116140.	ziyi zhu\180928\Tag2	ziyi zhu\180928\Tag2-046	38.9227	-8.99893							314.3				418					583			0.036	1.5		1.54	2.5	0.101			51.8					41.8					820	0	820	#DIV/0!	13.4969	7.15449
Europe	Germany	Elbe River	Zhu et al., 2020, Earth and Planetary Science Letters, 536, p.116140.	ziyi zhu\180430\Elbe	ziyi zhu\180430\Elbe-007	53.831	8.82492							314.8				1183					2430			0.017	1.58		2.28		0.17			224					133					504	0	504	#DIV/0!	38.1983	29.5009
Europe	Hungary	Danube River	Zhu et al., 2020, Earth and Planetary Science Letters, 536, p.116140.	callen\060215\e2	callen\060215\e2-070	53.9222	8.72222							314.87				846.315					1307.9				1.25862			5.83017	0.10404			124.954					55.7532					197.343	0	197.343	#DIV/0!	27.3269	15.848
Europe	France	Rhone River	Zhu et al., 2020, Earth and Planetary Science Letters, 536, p.116140.	wang yan\061213\e12	wang yan\061213\e12-007	53.9222	8.72222							315.577				591.146					1903.58				6.45536			13.8999	0.901408			190.634					83.9827					424.089	0	424.089	#DIV/0!	19.0877	23.2101
Europe	Poland	Oder River	Zhu et al., 2020, Earth and Planetary Science Letters, 536, p.116140.	CALLEN\060223\E3	CALLEN\060223\E3-100	53.9222	8.72222							316.136				352.085					755.726				10.218			2.31098	0.231274			68.7152					41.6347					259.693	0	259.693	#DIV/0!	11.3686	9.25145
Europe	Hungary	Danube River	Zhu et al., 2020, Earth and Planetary Science Letters, 536, p.116140.	callen\060215\e2	callen\060215\e2-090	53.9222	8.72222							316.21				191.098					522.944				4.66079			2.92901	0.161259			56.1946					26.267					61.9628	0	61.9628	#DIV/0!	6.17042	6.4321
Europe	Portugal	Tagus River	Zhu et al., 2020, Earth and Planetary Science Letters, 536, p.116140.	ziyi zhu\180928\Tag2	ziyi zhu\180928\Tag2-047	38.9227	-8.99893							316.836				924					1392			0.0194	0.731		1.52	5.95	0.16			138.7					53.9					577	0	577	#DIV/0!	29.8353	16.8761
Europe	Poland	Vistula River	Zhu et al., 2020, Earth and Planetary Science Letters, 536, p.116140.	ziyi zhu\180501\Vis1	ziyi zhu\180501\Vis1-095	54.3587	18.9465							317.3				818					1620			0.097	2.34		2.12		0.196			150					87.5					314	0	314	#DIV/0!	26.4127	19.6792
Europe	Italy	Po River	Zhu et al., 2020, Earth and Planetary Science Letters, 536, p.116140.	wang yan\070105\po	wang yan\070105\po-194	44.9525	12.4319							317.817				69.9383									7.90239			0.487694	0.155984			14.1286					15.3068					208.295	0	208.295	#DIV/0!	2.25826	0.235087
Europe	Hungary	Danube River	Zhu et al., 2020, Earth and Planetary Science Letters, 536, p.116140.	callen\060215\e2	callen\060215\e2-065	53.9222	8.72222							318.286				257.575					649.64				5.74839			1.53833				55.0612					40.1846					465.457	0	465.457	#DIV/0!	8.31691	7.92726
Europe	Germany	Rhine River	Zhu et al., 2020, Earth and Planetary Science Letters, 536, p.116140.	callen\060609\e10	callen\060609\E10-176	53.9222	8.72222							319.15				334.999					541.369			0.0438887	1.64625			3.29974	0.205376			58.8577					15.1955					493.229	0	493.229	#DIV/0!	10.8169	6.57403
Europe	Germany	Rhine River	Zhu et al., 2020, Earth and Planetary Science Letters, 536, p.116140.	callen\060609\e10	callen\060609\e10-072	53.9222	8.72222							319.207				786.441					782.748			0.0405421	1.34439			9.2609	0.149556			98.195					26.6738					132.733	0	132.733	#DIV/0!	25.3936	9.63397
Europe	Germany	Elbe River	Zhu et al., 2020, Earth and Planetary Science Letters, 536, p.116140.	ziyi zhu\180430\Elbe	ziyi zhu\180430\Elbe-032	53.831	8.82492							319.4				556					1171			0.0151	3.66		4.19		0.164			116.4					56.3					166.9	0	166.9	#DIV/0!	17.9529	14.2665
Europe	Hungary	Danube River	Zhu et al., 2020, Earth and Planetary Science Letters, 536, p.116140.	callen\060215\e2	callen\060215\e2-083	53.9222	8.72222							320.665				464.292					1120.92			0.110318	6.07385			5.2835	0.128001			110.061					52.1303					304.196	0	304.196	#DIV/0!	14.9917	13.664
Europe	Hungary	Danube River	Zhu et al., 2020, Earth and Planetary Science Letters, 536, p.116140.	wang yan\070110\e2	wang yan\070110\E2-40	53.9222	8.72222							320.898				805.753					1558.23				1.38741			3.7389				135.145					83.3254					371.585	0	371.585	#DIV/0!	26.0172	18.8705
Europe	Germany	Elbe River	Zhu et al., 2020, Earth and Planetary Science Letters, 536, p.116140.	ziyi zhu\180430\Elbe	ziyi zhu\180430\Elbe-052	53.831	8.82492							320.9				720					1299			0.0163	1.245		0.94		0.073			112					74.3					413	0	413	#DIV/0!	23.2483	15.7417
Europe	Hungary	Danube River	Zhu et al., 2020, Earth and Planetary Science Letters, 536, p.116140.	wang yan\070110\e2	wang yan\070110\E2-19	53.9222	8.72222							321.18				1089.24					2410.8				1.76408			5.85056	0.141394			212.76					132.958					595.288	0	595.288	#DIV/0!	35.1708	29.2396
Europe	Hungary	Danube River	Zhu et al., 2020, Earth and Planetary Science Letters, 536, p.116140.	callen\060215\e2	callen\060215\e2-100	53.9222	8.72222							321.183				1050.12					1828.5				2.19933			6.58522	0.146165			169.221					87.22					148.351	0	148.351	#DIV/0!	33.9078	22.1683
Europe	Germany	Rhine River	Zhu et al., 2020, Earth and Planetary Science Letters, 536, p.116140.	callen\060609\e10	callen\060609\e10-087	53.9222	8.72222							321.738				236.324					628.62			0.196419	11.8048			4.1105	0.257439			60.0643					24.4796					292.152	0	292.152	#DIV/0!	7.63073	7.6953
Europe	Portugal	Tagus River	Zhu et al., 2020, Earth and Planetary Science Letters, 536, p.116140.	ziyi zhu\180928\Tag2	ziyi zhu\180929\Tag2-077	38.9227	-8.99893							321.759				997					1187			0.0141	1.13		2.92	9.52	0.291			138.9					44.2					458	0	458	#DIV/0!	32.1924	14.5531
Europe	Portugal	Tagus River	Zhu et al., 2020, Earth and Planetary Science Letters, 536, p.116140.	ziyi zhu\180928\Tag2	ziyi zhu\180929\Tag2-115	38.9227	-8.99893							322.084				1043					1840			0.0082	1.67		2.46	5.98	0.139			164.2					100.5					257	0	257	#DIV/0!	33.6778	22.3519
Europe	Poland	Vistula River	Zhu et al., 2020, Earth and Planetary Science Letters, 536, p.116140.	ziyi zhu\180501\Vis1	ziyi zhu\180501\Vis1-003	54.3587	18.9465							322.2				774					2067			0.235	7.29		2.44		0.191			190.6					100.4					676	0	676	#DIV/0!	24.9919	25.0694
Europe	Hungary	Danube River	Zhu et al., 2020, Earth and Planetary Science Letters, 536, p.116140.	callen\060215\e2	callen\060215\e2-126	53.9222	8.72222							323.202				1249.23					2419.67			0.364634	7.92074			14.0725	2.61672			247.834					124.144					678.049	0	678.049	#DIV/0!	40.3369	29.6223
Europe	Portugal	Tagus River	Zhu et al., 2020, Earth and Planetary Science Letters, 536, p.116140.	ziyi zhu\180928\Tag2	ziyi zhu\180929\Tag2-053	38.9227	-8.99893							323.299				669					1670			0.0069	1.91		2.74	6.18	0.315			152.7					87.7					297	0	297	#DIV/0!	21.6015	20.3018
Europe	Hungary	Danube River	Zhu et al., 2020, Earth and Planetary Science Letters, 536, p.116140.	callen\060215\e2	callen\060215\e2-075	53.9222	8.72222							323.31				228.286					393.74				5.11023			1.21888	0.221575			33.6382					31.0956					365.9	0	365.9	#DIV/0!	7.37121	4.85975
Europe	Germany	Elbe River	Zhu et al., 2020, Earth and Planetary Science Letters, 536, p.116140.	ziyi zhu\180430\Elbe	ziyi zhu\180430\Elbe-084	53.831	8.82492							323.5				556					1409			0.0079	4.35		1.92		0.049			135.3					73.5					246	0	246	#DIV/0!	17.9529	17.1466
Europe	Hungary	Danube River	Zhu et al., 2020, Earth and Planetary Science Letters, 536, p.116140.	wang yan\070110\e2	wang yan\070110\e2-01	53.9222	8.72222							323.509				1396.72					2593.52				2.36707			28.9552	0.297374			304.516					83.2208					152.434	0	152.434	#DIV/0!	45.0991	31.7343
Europe	Hungary	Danube River	Zhu et al., 2020, Earth and Planetary Science Letters, 536, p.116140.	wang yan\070110\e2	wang yan\070110\E2-18	53.9222	8.72222							323.594				531.832					1037.73				3.19502			4.533	0.118452			99.3391					49.5133					129.043	0	129.043	#DIV/0!	17.1725	12.621
Europe	Portugal	Tagus River	Zhu et al., 2020, Earth and Planetary Science Letters, 536, p.116140.	ziyi zhu\180501\Tag1	ziyi zhu\180501\Tag1-018	38.9227	-8.99893							323.9				649					1378			0.46	7.37		8.38		0.673			151.8					56.6					258	0	258	#DIV/0!	20.9558	16.8766
Europe	Germany	Rhine River	Zhu et al., 2020, Earth and Planetary Science Letters, 536, p.116140.	callen\060609\e10	callen\060609\E10-111	53.9222	8.72222							324.132				533.553					977.269			0.048147	5.87909			8.3751	0.763734			95.4966					37.578					38.2522	0	38.2522	#DIV/0!	17.2281	11.8983
Europe	Hungary	Danube River	Zhu et al., 2020, Earth and Planetary Science Letters, 536, p.116140.	wang yan\070110\e2	wang yan\070110\E2-15	53.9222	8.72222							324.413				159.149					561.275			0.185081	9.85917			1.54213	0.341634			43.0207					48.4349					751.655	0	751.655	#DIV/0!	5.13882	6.93928
Europe	Hungary	Danube River	Zhu et al., 2020, Earth and Planetary Science Letters, 536, p.116140.	callen\060215\e2	callen\060215\e2-133	53.9222	8.72222							325.152				320.988					627.02				2.51952			3.16539	0.407575			61.7608					36.1846					260.132	0	260.132	#DIV/0!	10.3645	7.68165
Europe	Portugal	Tagus River	Zhu et al., 2020, Earth and Planetary Science Letters, 536, p.116140.	ziyi zhu\180928\Tag2	ziyi zhu\180928\Tag2-042	38.9227	-8.99893							325.3				240					1392			0.631	23.4		10.57	12.5	2.32			143.7					61.6					636	0	636	#DIV/0!	7.74943	17.2376
Europe	Hungary	Danube River	Zhu et al., 2020, Earth and Planetary Science Letters, 536, p.116140.	wang yan\070110\e2	wang yan\070110\E2-38	53.9222	8.72222							325.545				836.081					1964.27			0.135716	3.76175			5.82378	0.123692			180.883					96.6854					616.769	0	616.769	#DIV/0!	26.9965	23.8282
Europe	Poland	Vistula River	Zhu et al., 2020, Earth and Planetary Science Letters, 536, p.116140.	ziyi zhu\180501\Vis1	ziyi zhu\180501\Vis1-028	54.3587	18.9465							325.657				198					1012			0.0234	8.45		3.74		1.45			93.9					55					161.6	0	161.6	#DIV/0!	6.39328	12.3717
Europe	Hungary	Danube River	Zhu et al., 2020, Earth and Planetary Science Letters, 536, p.116140.	callen\060215\e2	callen\060215\e2-029	53.9222	8.72222							326.174				800.326					1542.54				3.34206			6.22558	0.0981159			147.055					69.0109					250.857	0	250.857	#DIV/0!	25.842	18.7166
Europe	Germany	Rhine River	Zhu et al., 2020, Earth and Planetary Science Letters, 536, p.116140.	callen\060609\e10	callen\060609\e10-070	53.9222	8.72222							326.206				393.356					437.281				0.432872			1.21964	0.087723			40.8862					25.4131					292.708	0	292.708	#DIV/0!	12.7012	5.32739
Europe	Portugal	Tagus River	Zhu et al., 2020, Earth and Planetary Science Letters, 536, p.116140.	ziyi zhu\180928\Tag2	ziyi zhu\180929\Tag2-067r	38.9227	-8.99893							326.3				486					913			0.045	13.5		1.96	3.78	0.97			79.7					59.6					287	0	287	#DIV/0!	15.6926	11.2428
Europe	Portugal	Tagus River	Zhu et al., 2020, Earth and Planetary Science Letters, 536, p.116140.	ziyi zhu\180928\Tag2	ziyi zhu\180929\Tag2-120	38.9227	-8.99893							326.546				853					1800			0.284	4.45		3.28	7.6	0.206			171					85.9					422	0	422	#DIV/0!	27.5428	21.8991
Europe	Germany	Elbe River	Zhu et al., 2020, Earth and Planetary Science Letters, 536, p.116140.	ziyi zhu\180430\Elbe	ziyi zhu\180430\Elbe-006	53.831	8.82492							326.6				491					852				1.77		2.31		0.264			79.5					52.2					312	0	312	#DIV/0!	15.8541	10.4017
Europe	Hungary	Danube River	Zhu et al., 2020, Earth and Planetary Science Letters, 536, p.116140.	wang yan\070110\e2	wang yan\070110\E2-51	53.9222	8.72222							326.856				500					782.018			0.0513484	4.04976			6.35016	0.350964			80.8359					34.1282					77.4392	0	77.4392	#DIV/0!	16.1446	9.56287
Europe	Portugal	Tagus River	Zhu et al., 2020, Earth and Planetary Science Letters, 536, p.116140.	ziyi zhu\180501\Tag1	ziyi zhu\180501\Tag1-011	38.9227	-8.99893							326.9				1415					3080			0.0317	2.405		3.39		0.346			271					168.1					283	0	283	#DIV/0!	45.6894	37.3171
Europe	Portugal	Tagus River	Zhu et al., 2020, Earth and Planetary Science Letters, 536, p.116140.	ziyi zhu\180928\Tag2	ziyi zhu\180928\Tag2-007	38.9227	-8.99893							326.9				725					1320			0.0112	1.25		0.47	2.13	0.053			107.6					85.5					400	0	400	#DIV/0!	23.4098	16.0256
Europe	Portugal	Tagus River	Zhu et al., 2020, Earth and Planetary Science Letters, 536, p.116140.	ziyi zhu\180928\Tag2	ziyi zhu\180928\Tag2-010	38.9227	-8.99893							327.6				922					1828			0.786	5.22		6.46	7.85	2.15			163.5					98.3					198	0	198	#DIV/0!	29.7707	22.2844
Europe	Poland	Oder River	Zhu et al., 2020, Earth and Planetary Science Letters, 536, p.116140.	CALLEN\060223\E3	CALLEN\060223\E3-140	53.9222	8.72222							327.706				854.333					1643.72				3.71048			5.47704	0.102495			153.104					77.5343					351.381	0	351.381	#DIV/0!	27.5858	19.9383
Europe	Germany	Rhine River	Zhu et al., 2020, Earth and Planetary Science Letters, 536, p.116140.	callen\060609\e10	callen\060609\e10-047	53.9222	8.72222							328.156				136.057					369.824			0.0369171	1.80286			0.423963	0.0829565			23.1994					29.5186					922.164	0	922.164	#DIV/0!	4.39319	4.48794
Europe	Poland	Oder River	Zhu et al., 2020, Earth and Planetary Science Letters, 536, p.116140.	CALLEN\060223\E3	CALLEN\060223\E3-026	53.9222	8.72222							328.556				680.2					1456.83			0.643813	7.03103			8.08166	0.134284			144.515					63.3825					284.779	0	284.779	#DIV/0!	21.9632	17.7482
Asia	India	Indus River	Zhu et al., 2020, Earth and Planetary Science Letters, 536, p.116140.	CALLEN\010827\IND	CALLEN\010827\IND-128	24.2079	67.7327							328.868				379.003								0.111593	8.14594		0.923897	0.270954	50.9914			94.5952					45.5556					171.217	0	171.217	#DIV/0!	12.2377	1.24507
Europe	Germany	Rhine River	Zhu et al., 2020, Earth and Planetary Science Letters, 536, p.116140.	callen\060609\e10	callen\060609\e10-040	53.9222	8.72222							328.965				147.707					568.191			0.0463643	4.59243			3.81517	0.39267			55.8711					30.5818					335.189	0	335.189	#DIV/0!	4.76936	6.97099
Europe	Hungary	Danube River	Zhu et al., 2020, Earth and Planetary Science Letters, 536, p.116140.	callen\060215\e2	callen\060215\e2-019	53.9222	8.72222							329.205				556.325					1337.57			0.315064	10.6521			6.82458	0.248414			130.396					61.5181					328.634	0	328.634	#DIV/0!	17.9634	16.325
Europe	France	Rhone River	Zhu et al., 2020, Earth and Planetary Science Letters, 536, p.116140.	wang yan\061213\e12	wang yan\061213\e12-160	53.9222	8.72222							329.465				160.029					576.197				9.63453			7.34325	1.55571			56.911					33.5311					1203.94	0	1203.94	#DIV/0!	5.16721	7.15106
Europe	Germany	Elbe River	Zhu et al., 2020, Earth and Planetary Science Letters, 536, p.116140.	ziyi zhu\180501\Elbe	ziyi zhu\180501\Elbe-177	53.831	8.82492							329.5				657					1234			0.0169	1.695		1.39		0.067			110.3					66.3					217	0	217	#DIV/0!	21.2141	14.9607
Europe	Germany	Rhine River	Zhu et al., 2020, Earth and Planetary Science Letters, 536, p.116140.	callen\060609\e10	callen\060609\e10-014	53.9222	8.72222							329.67				147.209					333.312				14.3811			2.87111	0.560104			54.2297					27.6886					168.979	0	168.979	#DIV/0!	4.75327	4.36666
Europe	Germany	Rhine River	Zhu et al., 2020, Earth and Planetary Science Letters, 536, p.116140.	callen\060609\e10	callen\060609\E10-157	53.9222	8.72222							329.7				486.829					1366.84				5.60141			8.61001	0.205871			114.611					45.7767					124.822	0	124.822	#DIV/0!	15.7194	16.4405
Europe	Hungary	Danube River	Zhu et al., 2020, Earth and Planetary Science Letters, 536, p.116140.	callen\060215\e2	callen\060215\e2-042	53.9222	8.72222							330.068				190.568					663.43				34.405			4.25804	1.59056			64.0354					35.2846					305.962	0	305.962	#DIV/0!	6.15331	8.34269
Europe	Poland	Oder River	Zhu et al., 2020, Earth and Planetary Science Letters, 536, p.116140.	CALLEN\060223\E3	CALLEN\060223\E3-093	53.9222	8.72222							330.183				883.039					1101.48				1.48099			6.3445	0.366337			111.876					56.6976					167.97	0	167.97	#DIV/0!	28.5127	13.4577
Europe	Poland	Vistula River	Zhu et al., 2020, Earth and Planetary Science Letters, 536, p.116140.	ziyi zhu\180501\Vis1	ziyi zhu\180501\Vis1-043	54.3587	18.9465							330.323				366					785			0.035	3.56		0.74		0.194			64.3					52.4					631	0	631	#DIV/0!	11.8179	9.55734
Europe	Germany	Rhine River	Zhu et al., 2020, Earth and Planetary Science Letters, 536, p.116140.	callen\060609\e10	callen\060609\e10-046	53.9222	8.72222							330.579				256.436					466.745			0.0446944	15.6724			3.36582	0.617206			41.6206					25.0822					761.917	0	761.917	#DIV/0!	8.28014	5.78831
Europe	Hungary	Danube River	Zhu et al., 2020, Earth and Planetary Science Letters, 536, p.116140.	callen\060215\e2	callen\060215\e2-009	53.9222	8.72222							330.684				624.169					1154.4				2.45622			3.60463	0.0773927			103.223					56.0493					197.651	0	197.651	#DIV/0!	20.154	13.9829
Europe	Italy	Po River	Zhu et al., 2020, Earth and Planetary Science Letters, 536, p.116140.	callen\041216\po	callen\041216\po-013	44.9525	12.4319							330.806				336.622					841.737			0.0691188	5.12661		2.6118	4.70289	0.195026			85.556					44.6204					600.243	0	600.243	#DIV/0!	10.8693	10.3376
Europe	Germany	Rhine River	Zhu et al., 2020, Earth and Planetary Science Letters, 536, p.116140.	callen\060609\e10	callen\060609\E10-197	53.9222	8.72222							331.796				1183.83					2140.2			0.03468	0.943372			4.69851	0.0917055			182.639					109.482					204.678	0	204.678	#DIV/0!	38.2251	25.8626
Europe	Germany	Rhine River	Zhu et al., 2020, Earth and Planetary Science Letters, 536, p.116140.	callen\060609\e10	callen\060609\E10-138	53.9222	8.72222							331.929				504.145					1239.36			0.279201	12.6035			5.42738	0.652185			114.252					67.8247					377.045	0	377.045	#DIV/0!	16.2785	15.164
Europe	Hungary	Danube River	Zhu et al., 2020, Earth and Planetary Science Letters, 536, p.116140.	callen\060215\e2	callen\060215\e2-108	53.9222	8.72222							332.094				199.92					478.432			0.73287	3.57649			4.53804	1.29377			43.981					25.1258					451.527	0	451.527	#DIV/0!	6.45528	5.86541
Europe	Germany	Rhine River	Zhu et al., 2020, Earth and Planetary Science Letters, 536, p.116140.	callen\060609\e10	callen\060609\E10-177	53.9222	8.72222							332.49				212.53					1495.17			0.0565708	20.2387			12.8748	2.68319			141.197					54.5801					258.691	0	258.691	#DIV/0!	6.86246	18.2474
Europe	France	Rhone River	Zhu et al., 2020, Earth and Planetary Science Letters, 536, p.116140.	wang yan\061213\e12	wang yan\061213\e12-009	53.9222	8.72222							333.317				216.806					1727.93				17.4453			12.1789	2.23987			177.383					76.2172					442.517	0	442.517	#DIV/0!	7.00053	21.1842
Europe	Italy	Po River	Zhu et al., 2020, Earth and Planetary Science Letters, 536, p.116140.	callen\041216\po	callen\041216\po-090	44.9525	12.4319							333.705				214.117					473.516			0.0784193	13.6145		1.82504	3.21751	0.923237			43.6789					25.107					440.381	0	440.381	#DIV/0!	6.91369	5.87652
Europe	Germany	Rhine River	Zhu et al., 2020, Earth and Planetary Science Letters, 536, p.116140.	callen\060609\e10	callen\060609\E10-112	53.9222	8.72222							333.823				237.932					521.039			0.0591835	9.17894			6.00666	0.922161			45.733					21.2535					249.189	0	249.189	#DIV/0!	7.68267	6.37579
Europe	Germany	Elbe River	Zhu et al., 2020, Earth and Planetary Science Letters, 536, p.116140.	ziyi zhu\180430\Elbe	ziyi zhu\180430\Elbe-149	53.831	8.82492							334.148				345					1049			0.8	18.72		6.09		0.801			93.6					59.5					631	0	631	#DIV/0!	11.1398	12.9027
Europe	France	Rhone River	Zhu et al., 2020, Earth and Planetary Science Letters, 536, p.116140.	wang yan\061213\e12	wang yan\061213\e12-131	53.9222	8.72222							334.789				79.5881					496.032				41.0566			3.80126	1.42773			47.2853					27.4945					567.354	0	567.354	#DIV/0!	2.56985	6.35548
Europe	Portugal	Tagus River	Zhu et al., 2020, Earth and Planetary Science Letters, 536, p.116140.	ziyi zhu\180928\Tag2	ziyi zhu\180929\Tag2-054	38.9227	-8.99893							335				640					1678			0.033	2.06		3.89	8.09	0.345			162.7					81.9					291	0	291	#DIV/0!	20.6652	20.4423
Europe	Hungary	Danube River	Zhu et al., 2020, Earth and Planetary Science Letters, 536, p.116140.	wang yan\070110\e2	wang yan\070110\e2-10	53.9222	8.72222							335.006				66.5396					50.9026				2.10132			0.680631	0.468298			7.32721					0.857312					298.036	0	298.036	#DIV/0!	2.14852	0.645178
Europe	Hungary	Danube River	Zhu et al., 2020, Earth and Planetary Science Letters, 536, p.116140.	callen\060215\e2	callen\060215\e2-030	53.9222	8.72222							335.11				806.31					1480.9				2.31692			4.67766	0.11073			132.213					78.1861					348.83	0	348.83	#DIV/0!	26.0352	17.9668
Europe	Germany	Rhine River	Zhu et al., 2020, Earth and Planetary Science Letters, 536, p.116140.	callen\060609\e10	callen\060609\E10-192	53.9222	8.72222							335.323				148.457					202.499			0.0366895	3.88312			0.960089	0.134868			22.8144					14.142					335.263	0	335.263	#DIV/0!	4.79357	2.53429
Europe	Portugal	Tagus River	Zhu et al., 2020, Earth and Planetary Science Letters, 536, p.116140.	ziyi zhu\180501\Tag1	ziyi zhu\180501\Tag1-001	38.9227	-8.99893							335.378				738					1352			0.0209	1.72		1.08		0.07			117.8					80.3					372	0	372	#DIV/0!	23.8295	16.4123
Europe	Germany	Rhine River	Zhu et al., 2020, Earth and Planetary Science Letters, 536, p.116140.	callen\060609\e10	callen\060609\E10-120	53.9222	8.72222							335.416				360.949					1146.14			0.0373691	4.35423			4.89579	0.16162			95.301					54.4733					426.302	0	426.302	#DIV/0!	11.6548	13.8551
Europe	Germany	Rhine River	Zhu et al., 2020, Earth and Planetary Science Letters, 536, p.116140.	callen\060609\e10	callen\060609\e10-015	53.9222	8.72222							335.966				565.25					1222.31			0.0391398	4.07123			4.82355	0.125741			110.027					46.3038					191.304	0	191.304	#DIV/0!	18.2515	14.7532
Europe	Hungary	Danube River	Zhu et al., 2020, Earth and Planetary Science Letters, 536, p.116140.	wang yan\070110\e2	wang yan\070110\E2-20	53.9222	8.72222							336.12				336.361					880.692			0.0588095	26.6881			7.65985	2.20132			98.3267					43.9996					188.261	0	188.261	#DIV/0!	10.8609	11.0194
Europe	Portugal	Tagus River	Zhu et al., 2020, Earth and Planetary Science Letters, 536, p.116140.	ziyi zhu\180928\Tag2	ziyi zhu\180928\Tag2-012	38.9227	-8.99893							336.2				283					693			0.146	12.9		1.09	2.13	0.58			48.7					69.3					314	0	314	#DIV/0!	9.13788	8.60963
Europe	Poland	Oder River	Zhu et al., 2020, Earth and Planetary Science Letters, 536, p.116140.	CALLEN\060223\E3	CALLEN\060223\E3-088	53.9222	8.72222							336.222				193.51					224.044				3.00332			1.73233	0.20497			22.462					11.6327					311.49	0	311.49	#DIV/0!	6.24831	2.75918
Europe	Germany	Elbe River	Zhu et al., 2020, Earth and Planetary Science Letters, 536, p.116140.	ziyi zhu\180430\Elbe	ziyi zhu\180430\Elbe-148	53.831	8.82492							336.3				609					856			0.0165	1.89		0.76		0.225			61.3					96.6					503	0	503	#DIV/0!	19.6642	10.5784
Europe	France	Rhone River	Zhu et al., 2020, Earth and Planetary Science Letters, 536, p.116140.	wang yan\061213\e12	wang yan\061213\e12-077	53.9222	8.72222							336.407				185.567					1129.47				23.1161			9.65341	2.06926			112.697					49.8574					488.283	0	488.283	#DIV/0!	5.99184	13.9261
Europe	Poland	Vistula River	Zhu et al., 2020, Earth and Planetary Science Letters, 536, p.116140.	ziyi zhu\180501\Vis1	ziyi zhu\180501\Vis1-078	54.3587	18.9465							336.9				179					78			0.0139	1.95		1.03		0.403			11.1					1.45					322	0	322	#DIV/0!	5.77979	0.977797
Europe	France	Rhone River	Zhu et al., 2020, Earth and Planetary Science Letters, 536, p.116140.	wang yan\061213\e12	wang yan\061213\e12-137	53.9222	8.72222							336.91				318.233					1096.13				7.08829			5.35748	0.233552			106.206					56.529					1134.2	0	1134.2	#DIV/0!	10.2755	13.3942
Europe	Germany	Elbe River	Zhu et al., 2020, Earth and Planetary Science Letters, 536, p.116140.	ziyi zhu\180501\Elbe	ziyi zhu\180501\Elbe-173	53.831	8.82492							336.954				160.1					89.2			0.0146	6.2		2.59		0.328			12.7					1.35					223.5	0	223.5	#DIV/0!	5.16952	1.15372
Europe	France	Rhone River	Zhu et al., 2020, Earth and Planetary Science Letters, 536, p.116140.	wang yan\061213\e12	wang yan\061213\e12-130	53.9222	8.72222							337.676				534.461					1668.06				36.4577			16.2803	1.17481			171.381					79.5372					996.309	0	996.309	#DIV/0!	17.2574	20.6487
Europe	Poland	Vistula River	Zhu et al., 2020, Earth and Planetary Science Letters, 536, p.116140.	ziyi zhu\180501\Vis2	ziyi zhu\180501\Vis2-077	54.3587	18.9465							337.704				567					1703			0.015	7.99		1.85		0.132			158.5					80					454	0	454	#DIV/0!	18.308	20.6597
Europe	Germany	Rhine River	Zhu et al., 2020, Earth and Planetary Science Letters, 536, p.116140.	callen\060609\e10	callen\060609\e10-080	53.9222	8.72222							337.764				320.796					841.278			0.0488957	3.50327			4.53099	0.291016			69.4789					43.5014					603.253	0	603.253	#DIV/0!	10.3583	10.1967
Europe	Germany	Rhine River	Zhu et al., 2020, Earth and Planetary Science Letters, 536, p.116140.	callen\060609\e10	callen\060609\e10-063	53.9222	8.72222							337.791				581.733					1304.64				3.20613			4.55688	0.0941762			122.826					61.4782					215.95	0	215.95	#DIV/0!	18.7838	15.8363
Europe	Germany	Fehrman Island	Zhu et al., 2020, Earth and Planetary Science Letters, 536, p.116140.	callen\051012\e5	callen\051012\e5-045	53.9222	8.72222							338.093				464.709					461.86			0.0941147	2.76159			3.34479	1.68252			55.1633					8.66478					127.966	0	127.966	#DIV/0!	15.0051	5.63796
Europe	Germany	Elbe River	Zhu et al., 2020, Earth and Planetary Science Letters, 536, p.116140.	ziyi zhu\180430\Elbe	ziyi zhu\180430\Elbe-020	53.831	8.82492							338.4				326.5					717			0.0185	9.36		1.88		0.104			71.9					33.5					150	0	150	#DIV/0!	10.5425	8.7798
Europe	Hungary	Danube River	Zhu et al., 2020, Earth and Planetary Science Letters, 536, p.116140.	wang yan\070110\e2	wang yan\070110\E2-25	53.9222	8.72222							338.443				1267.89					2290.89				1.67836			8.31624	0.21972			221.367					115.659					266.525	0	266.525	#DIV/0!	40.9393	27.8612
Europe	Portugal	Tagus River	Zhu et al., 2020, Earth and Planetary Science Letters, 536, p.116140.	ziyi zhu\180928\Tag2	ziyi zhu\180929\Tag2-073	38.9227	-8.99893							339.4				864					1306			0.031	1.51		1.92	4.7	0.163			120.4					68.8					127.2	0	127.2	#DIV/0!	27.898	15.8814
Europe	Germany	Fehrman Island	Zhu et al., 2020, Earth and Planetary Science Letters, 536, p.116140.	callen\051012\e5	callen\051012\e5-065	53.9222	8.72222							339.479				325.955					196.913				4.1395			5.63915	0.939971			27.5598					3.30054					128.393	0	128.393	#DIV/0!	10.5249	2.47668
Europe	Hungary	Danube River	Zhu et al., 2020, Earth and Planetary Science Letters, 536, p.116140.	callen\060215\e2	callen\060215\e2-066	53.9222	8.72222							339.646				236.701					1391.84				20.2947			5.73447	1.03081			121.336					78.818					597.473	0	597.473	#DIV/0!	7.64292	17.0431
Europe	Germany	Elbe River	Zhu et al., 2020, Earth and Planetary Science Letters, 536, p.116140.	ziyi zhu\180430\Elbe	ziyi zhu\180430\Elbe-046	53.831	8.82492							339.757				202.6					105.1			0.0075	3.63		1.33		0.616			14.04					2.074					214.8	0	214.8	#DIV/0!	6.54181	1.31972
Europe	Portugal	Tagus River	Zhu et al., 2020, Earth and Planetary Science Letters, 536, p.116140.	ziyi zhu\180928\Tag2	ziyi zhu\180929\Tag2-088	38.9227	-8.99893							339.9				550					878			0.0128	1.27		2.69	7.1	0.226			108					26.2					239	0	239	#DIV/0!	17.7591	10.7671
Europe	Germany	Rhine River	Zhu et al., 2020, Earth and Planetary Science Letters, 536, p.116140.	callen\060609\e10	callen\060609\E10-191	53.9222	8.72222							340.524				181.638					430.42			0.0544566	10.3527			3.28331	0.450207			41.5973					22.1033					460.393	0	460.393	#DIV/0!	5.86496	5.32299
Europe	France	Rhone River	Zhu et al., 2020, Earth and Planetary Science Letters, 536, p.116140.	wang yan\061213\e12	wang yan\061213\e12-140	53.9222	8.72222							340.539				292.442					1417.71				5.20524			11.158	0.674756			144.303					67.2059					866.855	0	866.855	#DIV/0!	9.44276	17.3351
Europe	Germany	Rhine River	Zhu et al., 2020, Earth and Planetary Science Letters, 536, p.116140.	callen\060609\e10	callen\060609\e10-035	53.9222	8.72222							340.818				155.659					218.089			0.0703957	8.75221			1.79383	0.321713			20.3777					12.083					278.562	0	278.562	#DIV/0!	5.02611	2.72466
Europe	Poland	Vistula River	Zhu et al., 2020, Earth and Planetary Science Letters, 536, p.116140.	ziyi zhu\180501\Vis2	ziyi zhu\180501\Vis2-059	54.3587	18.9465							341				250					1182			0.047	10.13		4.32		0.379			122.1					51.7					238	0	238	#DIV/0!	8.07233	14.4477
Europe	Hungary	Danube River	Zhu et al., 2020, Earth and Planetary Science Letters, 536, p.116140.	callen\060215\e2	callen\060215\e2-045	53.9222	8.72222							341.087				59.4632					160.113				6.26833			0.307687	0.133405			11.6594					12.3264					432.206	0	432.206	#DIV/0!	1.92003	1.9909
Europe	France	Rhone River	Zhu et al., 2020, Earth and Planetary Science Letters, 536, p.116140.	wang yan\061213\e12	wang yan\061213\e12-072	53.9222	8.72222							341.417				745.375					1318.95				1.40116			2.92469				113.916					72.9447					268.489	0	268.489	#DIV/0!	24.0676	15.9836
Europe	Germany	Rhine River	Zhu et al., 2020, Earth and Planetary Science Letters, 536, p.116140.	callen\060609\e10	callen\060609\E10-175	53.9222	8.72222							341.651				241.795					483.016				7.06832			1.90056	0.909502			41.7667					22.5712					193.092	0	193.092	#DIV/0!	7.8074	5.88832
Europe	Germany	Elbe River	Zhu et al., 2020, Earth and Planetary Science Letters, 536, p.116140.	ziyi zhu\180501\Elbe	ziyi zhu\180501\Elbe-176	53.831	8.82492							342.019				760					1287			0.0076	1.112		1.27		0.121			114.4					75.1					323	0	323	#DIV/0!	24.5399	15.6277
Europe	Germany	Rhine River	Zhu et al., 2020, Earth and Planetary Science Letters, 536, p.116140.	callen\060609\e10	callen\060609\e10-104	53.9222	8.72222							342.651				249.52					423.503				37.8432			5.81902	1.77291			48.4884					20.7573					90.6907	0	90.6907	#DIV/0!	8.05683	5.50129
Europe	Hungary	Danube River	Zhu et al., 2020, Earth and Planetary Science Letters, 536, p.116140.	wang yan\070110\e2	wang yan\070110\e2-06	53.9222	8.72222							342.682				138.489					673.951				26.9678			2.59433	0.707364			56.3554					46.1719					779.603	0	779.603	#DIV/0!	4.47173	8.40604
Europe	Germany	Rhine River	Zhu et al., 2020, Earth and Planetary Science Letters, 536, p.116140.	callen\060609\e10	callen\060609\e10-020	53.9222	8.72222							342.772				316.783					1558.41			0.0471706	22.2331			7.61813	1.57461			139.914					81.0662					870.845	0	870.845	#DIV/0!	10.2287	19.0742
Europe	Germany	Elbe River	Zhu et al., 2020, Earth and Planetary Science Letters, 536, p.116140.	ziyi zhu\180430\Elbe	ziyi zhu\180430\Elbe-056	53.831	8.82492							342.8				379					1150			0.73	12.9		6.81		0.481			122					47					192	0	192	#DIV/0!	12.2376	14.1029
Europe	Poland	Oder River	Zhu et al., 2020, Earth and Planetary Science Letters, 536, p.116140.	CALLEN\060223\E3	CALLEN\060223\E3-130	53.9222	8.72222							343.234				278.582					185.501				1.09193			1.84858	0.972764			23.9389					4.76778					390.382	0	390.382	#DIV/0!	8.99524	2.28767
Europe	Germany	Rhine River	Zhu et al., 2020, Earth and Planetary Science Letters, 536, p.116140.	callen\060609\e10	callen\060609\E10-163	53.9222	8.72222							343.388				287.809					573.248			0.0385885	14.1313			4.0698	0.130455			54.0153					19.9582					445.598	0	445.598	#DIV/0!	9.29316	7.02374
Europe	Germany	Rhine River	Zhu et al., 2020, Earth and Planetary Science Letters, 536, p.116140.	callen\060609\e10	callen\060609\e10-099	53.9222	8.72222							343.686				176.269					430.321			0.0069222	4.19111			1.66216	0.129835			38.9368					26.1418					315.246	0	315.246	#DIV/0!	5.69159	5.27137
Europe	Italy	Po River	Zhu et al., 2020, Earth and Planetary Science Letters, 536, p.116140.	wang yan\070105\po	wang yan\070105\po-157	44.9525	12.4319							343.734				95.7877								0.0924729	4.48449			2.12477	0.569777			22.697					13.0057					302.161	0	302.161	#DIV/0!	3.09292	0.264543
Europe	Hungary	Danube River	Zhu et al., 2020, Earth and Planetary Science Letters, 536, p.116140.	callen\060215\e2	callen\060215\e2-119	53.9222	8.72222							344.343				311.692					707.19				18.9372			3.87456	1.41355			60.1812					50.9724					161.203	0	161.203	#DIV/0!	10.0643	8.78674
Europe	Portugal	Tagus River	Zhu et al., 2020, Earth and Planetary Science Letters, 536, p.116140.	ziyi zhu\180928\Tag2	ziyi zhu\180928\Tag2-049	38.9227	-8.99893							344.358				1020					1747			0.0154	1.84		2.45	6.25	0.163			158.6					94.5					209	0	209	#DIV/0!	32.9351	21.2402
Europe	Germany	Elbe River	Zhu et al., 2020, Earth and Planetary Science Letters, 536, p.116140.	ziyi zhu\180501\Elbe	ziyi zhu\180501\Elbe-178	53.831	8.82492							344.632				309					1230			0.037	15.44		2.65		0.675			107					70.6					705	0	705	#DIV/0!	9.9774	15.031
Europe	Italy	Po River	Zhu et al., 2020, Earth and Planetary Science Letters, 536, p.116140.	callen\041216\po	callen\041216\po-007	44.9525	12.4319							344.682				220.318					1228.39				7.12092		2.79984	5.09945	2.54243			110.275					80.175					42.5345	0	42.5345	#DIV/0!	7.11391	15.0753
Europe	Hungary	Danube River	Zhu et al., 2020, Earth and Planetary Science Letters, 536, p.116140.	callen\060215\e2	callen\060215\e2-072	53.9222	8.72222							344.77				543.121					1313.92			0.105667	2.744			5.27138	0.28805			112.46					73.6985					582.094	0	582.094	#DIV/0!	17.537	15.9502
Europe	Hungary	Danube River	Zhu et al., 2020, Earth and Planetary Science Letters, 536, p.116140.	wang yan\070110\e2	wang yan\070110\E2-49	53.9222	8.72222							346.1				443.017					670.489			0.0979513	1.62811			2.77259	0.49156			55.0369					52.659					678.893	0	678.893	#DIV/0!	14.3047	8.21566
Europe	Italy	Po River	Zhu et al., 2020, Earth and Planetary Science Letters, 536, p.116140.	callen\041216\po	callen\041216\po-120	44.9525	12.4319							346.542				422.684					1305.01				33.6818		4.03403	7.99356	1.76485			123.045					65.3379					522.087	0	522.087	#DIV/0!	13.6482	16.1433
Europe	Germany	Rhine River	Zhu et al., 2020, Earth and Planetary Science Letters, 536, p.116140.	callen\060609\e10	callen\060609\e10-008	53.9222	8.72222							347.361				280.03					125.284			0.047233	3.36227			4.86497	0.397349			21.2251					0.917886					358.99	0	358.99	#DIV/0!	9.04199	1.60443
Europe	Germany	Rhine River	Zhu et al., 2020, Earth and Planetary Science Letters, 536, p.116140.	callen\060609\e10	callen\060609\e10-097	53.9222	8.72222							347.621				723.85					1269.67			0.0748774	2.43575			3.87293	0.297001			106.84					66.6611					122.638	0	122.638	#DIV/0!	23.3726	15.3661
Europe	Poland	Vistula River	Zhu et al., 2020, Earth and Planetary Science Letters, 536, p.116140.	ziyi zhu\180501\Vis2	ziyi zhu\180501\Vis2-011	54.3587	18.9465							347.8				198.3					349			0.022	4.43		1.29		0.292			34.7					18					486	0	486	#DIV/0!	6.40297	4.2848
Europe	Poland	Vistula River	Zhu et al., 2020, Earth and Planetary Science Letters, 536, p.116140.	ziyi zhu\180501\Vis2	ziyi zhu\180501\Vis2-088	54.3587	18.9465							348.13				206					267.3			0.0118	1.106		0.81		0.472			30.88					4.84					42.01	0	42.01	#DIV/0!	6.6516	3.24114
Europe	Poland	Vistula River	Zhu et al., 2020, Earth and Planetary Science Letters, 536, p.116140.	ziyi zhu\180501\Vis1	ziyi zhu\180501\Vis1-025	54.3587	18.9465							348.513				328.2					158.9				0.407		0.495		0.342			27.8					1.65					326.8	0	326.8	#DIV/0!	10.5974	1.97649
Europe	Hungary	Danube River	Zhu et al., 2020, Earth and Planetary Science Letters, 536, p.116140.	wang yan\070110\e2	wang yan\070110\E2-60	53.9222	8.72222							349.281				417.173					1552.38			0.682563	46.3718			4.64601	1.09716			133.011					86.9556					307.403	0	307.403	#DIV/0!	13.4702	19.1516
Europe	Germany	Rhine River	Zhu et al., 2020, Earth and Planetary Science Letters, 536, p.116140.	callen\060609\e10	callen\060609\E10-198	53.9222	8.72222							350.314				405.131					331.9				0.102963			0.687773	0.523052			37.1814					6.17719					549.576	0	549.576	#DIV/0!	13.0814	4.00627
Europe	Germany	Rhine River	Zhu et al., 2020, Earth and Planetary Science Letters, 536, p.116140.	callen\060609\e10	callen\060609\e10-022	53.9222	8.72222							352.003				167.786					685.966			0.0388007	7.82397			1.83283	0.669529			52.7188					54.0872					93.1686	0	93.1686	#DIV/0!	5.4177	8.42236
Europe	Portugal	Tagus River	Zhu et al., 2020, Earth and Planetary Science Letters, 536, p.116140.	ziyi zhu\180501\Tag1	ziyi zhu\180501\Tag1-017	38.9227	-8.99893							352.2				281					940			0.042	7.68		2.81		0.24			95					41.4					177	0	177	#DIV/0!	9.0733	11.4711
Europe	Germany	Elbe River	Zhu et al., 2020, Earth and Planetary Science Letters, 536, p.116140.	ziyi zhu\180430\Elbe	ziyi zhu\180430\Elbe-119	53.831	8.82492							352.207				266					491			0.178	11.5		2.48		0.353			41.2					30.5					557	0	557	#DIV/0!	8.58896	6.05377
Europe	Hungary	Danube River	Zhu et al., 2020, Earth and Planetary Science Letters, 536, p.116140.	callen\060215\e2	callen\060215\e2-062	53.9222	8.72222							352.271				282.332					1498.8			0.0868107	37.4661			16.3783	6.96727			154.344					80.3988					346.342	0	346.342	#DIV/0!	9.11632	18.6914
Europe	Poland	Vistula River	Zhu et al., 2020, Earth and Planetary Science Letters, 536, p.116140.	ziyi zhu\180501\Vis2	ziyi zhu\180501\Vis2-087	54.3587	18.9465							352.745				324					538.8			0.049	8.27		0.52		0.294			40					44.08					148.8	0	148.8	#DIV/0!	10.4617	6.6237
Europe	Hungary	Danube River	Zhu et al., 2020, Earth and Planetary Science Letters, 536, p.116140.	callen\060215\e2	callen\060215\e2-034	53.9222	8.72222							353.503				843.326					1348.25			0.029516	1.17304			4.70298	0.142349			123.121					72.4073					117.308	0	117.308	#DIV/0!	27.2304	16.3781
Europe	Portugal	Tagus River	Zhu et al., 2020, Earth and Planetary Science Letters, 536, p.116140.	ziyi zhu\180928\Tag2	ziyi zhu\180928\Tag2-037	38.9227	-8.99893							354.2				507					1280			0.0272	9.85		2.13	4.44	0.88			110.8					74.6					299	0	299	#DIV/0!	16.3707	15.6269
Europe	Poland	Vistula River	Zhu et al., 2020, Earth and Planetary Science Letters, 536, p.116140.	ziyi zhu\180501\Vis1	ziyi zhu\180501\Vis1-027	54.3587	18.9465							354.7				593					1184			0.066	3.14		4.14		0.468			113.9					64.8					411	0	411	#DIV/0!	19.1476	14.4442
Europe	Italy	Po River	Zhu et al., 2020, Earth and Planetary Science Letters, 536, p.116140.	callen\041216\po	callen\041216\po-116	44.9525	12.4319							355.096				411.505					719.822				2.88672		4.15766	6.65778	0.445035			74.9616					33.5966					135.494	0	135.494	#DIV/0!	13.2872	8.8469
Europe	Hungary	Danube River	Zhu et al., 2020, Earth and Planetary Science Letters, 536, p.116140.	callen\060215\e2	callen\060215\e2-111	53.9222	8.72222							355.433				767.088					965.255			0.102294	1.29008			4.2269	0.186188			91.4575					50.0678					135.531	0	135.531	#DIV/0!	24.7687	11.746
Europe	Poland	Vistula River	Zhu et al., 2020, Earth and Planetary Science Letters, 536, p.116140.	ziyi zhu\180501\Vis2	ziyi zhu\180501\Vis2-074	54.3587	18.9465							356.9				477					876			0.0319	2.19		1.31		0.144			80.4					47.8					158.3	0	158.3	#DIV/0!	15.402	10.6476
Europe	Germany	Elbe River	Zhu et al., 2020, Earth and Planetary Science Letters, 536, p.116140.	ziyi zhu\180430\Elbe	ziyi zhu\180430\Elbe-089	53.831	8.82492							357.1				908					1799			0.0174	1.65		3.23		0.259			170.6					90.7					208	0	208	#DIV/0!	29.3187	21.8404
Europe	Portugal	Tagus River	Zhu et al., 2020, Earth and Planetary Science Letters, 536, p.116140.	ziyi zhu\180501\Tag1	ziyi zhu\180501\Tag1-012	38.9227	-8.99893							357.288				872					1809			0.091	2.47		3.57		0.292			170.3					104.2					546	0	546	#DIV/0!	28.1563	22.0371
Europe	Portugal	Tagus River	Zhu et al., 2020, Earth and Planetary Science Letters, 536, p.116140.	ziyi zhu\180501\Tag1	ziyi zhu\180501\Tag1-020	38.9227	-8.99893							358.799				751					1437			0.0115	2.3		2		0.208			126					84.6					344	0	344	#DIV/0!	24.2493	17.4548
Europe	Portugal	Tagus River	Zhu et al., 2020, Earth and Planetary Science Letters, 536, p.116140.	ziyi zhu\180928\Tag2	ziyi zhu\180928\Tag2-035	38.9227	-8.99893							358.9				624					1150			0.134	3.03		2.26	5.04	0.177			112.5					55.61					164.1	0	164.1	#DIV/0!	20.1485	14.0189
Europe	Poland	Vistula River	Zhu et al., 2020, Earth and Planetary Science Letters, 536, p.116140.	ziyi zhu\180501\Vis2	ziyi zhu\180501\Vis2-024	54.3587	18.9465							359				654					1246			0.096	2.68		4.24		0.419			124					62.8					327	0	327	#DIV/0!	21.1172	15.1897
Europe	Poland	Vistula River	Zhu et al., 2020, Earth and Planetary Science Letters, 536, p.116140.	ziyi zhu\180501\Vis1	ziyi zhu\180501\Vis1-034	54.3587	18.9465							359.362				170.6					184.9			0.075	8.55		2.58		0.625			20.13					4.64					46.32	0	46.32	#DIV/0!	5.50856	2.31383
Europe	Germany	Rhine River	Zhu et al., 2020, Earth and Planetary Science Letters, 536, p.116140.	callen\060609\e10	callen\060609\e10-023	53.9222	8.72222							359.853				202.231					1129.29			0.0380244	4.59585			3.28358	0.966706			90.563					77.4084					152.274	0	152.274	#DIV/0!	6.52991	13.7639
Europe	Italy	Po River	Zhu et al., 2020, Earth and Planetary Science Letters, 536, p.116140.	callen\041216\po	callen\041216\po-097	44.9525	12.4319							363.05				161.733					509.817				12.8136		1.249	2.36486	0.428564			42.5143					33.176					423.651	0	423.651	#DIV/0!	5.22226	6.30459
Europe	Poland	Vistula River	Zhu et al., 2020, Earth and Planetary Science Letters, 536, p.116140.	ziyi zhu\180501\Vis1	ziyi zhu\180501\Vis1-070	54.3587	18.9465							363.2				95.9					260.4			0.006	2.34		0.83		0.751			40.5					1.8					768	0	768	#DIV/0!	3.09655	3.21609
Europe	Germany	Elbe River	Zhu et al., 2020, Earth and Planetary Science Letters, 536, p.116140.	ziyi zhu\180430\Elbe	ziyi zhu\180430\Elbe-101	53.831	8.82492							364.8				465					1069			0.3	4.91		8.68		0.689			112.2					47.02					127.5	0	127.5	#DIV/0!	15.0145	13.0858
Europe	Germany	Elbe River	Zhu et al., 2020, Earth and Planetary Science Letters, 536, p.116140.	ziyi zhu\180430\Elbe	ziyi zhu\180430\Elbe-037	53.831	8.82492							365.303				417					784			0.051	13.29		0.92		0.265			66.3					51.1					351	0	351	#DIV/0!	13.4646	9.62225
Europe	France	Rhone River	Zhu et al., 2020, Earth and Planetary Science Letters, 536, p.116140.	wang yan\061213\e12	wang yan\061213\e12-058	53.9222	8.72222							365.33				87.5589					173.261				4.13427							11.9136					17.9993					765.223	0	765.223	#DIV/0!	2.82722	2.15462
Europe	Italy	Po River	Zhu et al., 2020, Earth and Planetary Science Letters, 536, p.116140.	callen\041216\po	callen\041216\po-072	44.9525	12.4319							367.09				343.89					860.086			0.0656053	16.6471		1.98944	3.61504	1.27285			72.6822					63.6739					364.344	0	364.344	#DIV/0!	11.104	10.6514
Europe	Germany	Elbe River	Zhu et al., 2020, Earth and Planetary Science Letters, 536, p.116140.	ziyi zhu\180430\Elbe	ziyi zhu\180430\Elbe-055	53.831	8.82492							368.2				936					1494				0.618		0.86		0.084			129.2					88.5					159	0	159	#DIV/0!	30.2228	18.1171
Europe	Poland	Vistula River	Zhu et al., 2020, Earth and Planetary Science Letters, 536, p.116140.	ziyi zhu\180501\Vis2	ziyi zhu\180501\Vis2-048	54.3587	18.9465							368.9				645					1080			0.0098	1.9		2.67		0.358			103.7					57.5					278	0	278	#DIV/0!	20.8266	13.1497
Europe	Poland	Oder River	Zhu et al., 2020, Earth and Planetary Science Letters, 536, p.116140.	CALLEN\060223\E3	CALLEN\060223\E3-082	53.9222	8.72222							370.808				482.143					649.03			0.149684	8.85074			7.74613	1.81824			73.7359					25.0397					102.971	0	102.971	#DIV/0!	15.5681	8.02524
Europe	Poland	Vistula River	Zhu et al., 2020, Earth and Planetary Science Letters, 536, p.116140.	ziyi zhu\180501\Vis1	ziyi zhu\180501\Vis1-004	54.3587	18.9465							373.8				178					165			0.045	8.05		1.76		0.188			17.5					6.5					160	0	160	#DIV/0!	5.7475	2.07208
Europe	Portugal	Tagus River	Zhu et al., 2020, Earth and Planetary Science Letters, 536, p.116140.	ziyi zhu\180501\Tag1	ziyi zhu\180501\Tag1-015	38.9227	-8.99893							375.424				939					1869			0.085	2.56		4.07		0.56			181.1					94.6					274	0	274	#DIV/0!	30.3197	22.7294
Europe	Poland	Vistula River	Zhu et al., 2020, Earth and Planetary Science Letters, 536, p.116140.	ziyi zhu\180501\Vis2	ziyi zhu\180501\Vis2-032	54.3587	18.9465							375.724				244.3					565			0.0277	6.27		0.7		0.409			39.6					58.1					677	0	677	#DIV/0!	7.88828	6.98365
Europe	Germany	Rhine River	Zhu et al., 2020, Earth and Planetary Science Letters, 536, p.116140.	callen\060609\e10	callen\060609\E10-180	53.9222	8.72222							376.011				349.819								0.0441715	4.78642			2.40255	0.128899			80.0658					49.2825					363.245	0	363.245	#DIV/0!	11.2954	0.825631
Europe	Hungary	Danube River	Zhu et al., 2020, Earth and Planetary Science Letters, 536, p.116140.	wang yan\070110\e2	wang yan\070110\E2-23	53.9222	8.72222							380.972				452.557					872.418				1.47569			4.54151	0.483984			90.7666					40.4776					198.105	0	198.105	#DIV/0!	14.6127	10.6473
Europe	Germany	Rhine River	Zhu et al., 2020, Earth and Planetary Science Letters, 536, p.116140.	callen\060609\e10	callen\060609\e10-031	53.9222	8.72222							381.762				1230.27					2777.1			0.0599232	4.17945			6.33767	0.29454			199.869					113.059					260.021	0	260.021	#DIV/0!	39.7245	33.1888
Europe	France	Rhone River	Zhu et al., 2020, Earth and Planetary Science Letters, 536, p.116140.	wang yan\061213\e12	wang yan\061213\e12-002	53.9222	8.72222							383.323				126.899					304.908				11.4914			0.898384	0.432752			22.367					27.2884					229.692	0	229.692	#DIV/0!	4.09748	3.8142
Europe	Poland	Oder River	Zhu et al., 2020, Earth and Planetary Science Letters, 536, p.116140.	CALLEN\060223\E3	CALLEN\060223\E3-126	53.9222	8.72222							387.419				1553.56					2637.72			0.235796	2.5898			6.40828	0.220492			232.394					132.848					303.911	0	303.911	#DIV/0!	50.1632	31.9241
Europe	Portugal	Tagus River	Zhu et al., 2020, Earth and Planetary Science Letters, 536, p.116140.	ziyi zhu\180928\Tag2	ziyi zhu\180928\Tag2-021	38.9227	-8.99893							389.4				1020					2108			0.089	2.54		2.65	6.29	0.157			188					119.1					566	0	566	#DIV/0!	32.9351	25.6295
Europe	Germany	Rhine River	Zhu et al., 2020, Earth and Planetary Science Letters, 536, p.116140.	callen\060609\e10	callen\060609\e10-077	53.9222	8.72222							390.044				269.241					683.445			0.0433868	4.52051			3.14092	0.475625			73.0962					39.7166					130.995	0	130.995	#DIV/0!	8.69359	8.42116
Europe	Hungary	Danube River	Zhu et al., 2020, Earth and Planetary Science Letters, 536, p.116140.	callen\060215\e2	callen\060215\e2-128	53.9222	8.72222							390.182				966.392					1477.23				2.85308			7.79926	0.184327			152.359					72.7953					218.547	0	218.547	#DIV/0!	31.2041	18.0438
Europe	Portugal	Tagus River	Zhu et al., 2020, Earth and Planetary Science Letters, 536, p.116140.	ziyi zhu\180928\Tag2	ziyi zhu\180928\Tag2-041	38.9227	-8.99893							390.4				552					1649			0.167	5.45		9	12.4	0.83			175.9					65.7					279	0	279	#DIV/0!	17.8237	20.1972
Europe	Poland	Vistula River	Zhu et al., 2020, Earth and Planetary Science Letters, 536, p.116140.	ziyi zhu\180501\Vis2	ziyi zhu\180501\Vis2-071	54.3587	18.9465							392.683				338					806			0.004	7.02		0.64		0.554			59.8					70.3					189	0	189	#DIV/0!	10.9138	9.8943
Europe	Hungary	Danube River	Zhu et al., 2020, Earth and Planetary Science Letters, 536, p.116140.	callen\060215\e2	callen\060215\e2-023	53.9222	8.72222							393.089				397.156					762.454				28.9678			4.71689	1.38948			81.5978					40.4775					356.099	0	356.099	#DIV/0!	12.8239	9.55724
Europe	Italy	Po River	Zhu et al., 2020, Earth and Planetary Science Letters, 536, p.116140.	callen\041216\po	callen\041216\po-016	44.9525	12.4319							393.137				817.752					1453.95				1.09304			1.82858	0.545195			101.666					114.007					511.25	0	511.25	#DIV/0!	26.4046	17.6555
Europe	France	Rhone River	Zhu et al., 2020, Earth and Planetary Science Letters, 536, p.116140.	wang yan\061213\e12	wang yan\061213\e12-155	53.9222	8.72222							395.472				1375.95					2458.1				1.15045			7.80853	2.55973			219.727					170.805					1265.86	0	1265.86	#DIV/0!	44.4285	30.0554
Europe	Germany	Rhine River	Zhu et al., 2020, Earth and Planetary Science Letters, 536, p.116140.	callen\060609\e10	callen\060609\e10-074	53.9222	8.72222							398.609				577.807								0.0457651	1.48501			3.66974	0.080583			74.7145					20.3584					211.656	0	211.656	#DIV/0!	18.657	0.611975
Europe	Poland	Vistula River	Zhu et al., 2020, Earth and Planetary Science Letters, 536, p.116140.	ziyi zhu\180501\Vis1	ziyi zhu\180501\Vis1-105	54.3587	18.9465							411.5				1597					3090			0.071	0.752		1		0.057			231.3					216.6					497	0	497	#DIV/0!	51.566	37.4324
Europe	Italy	Po River	Zhu et al., 2020, Earth and Planetary Science Letters, 536, p.116140.	callen\041216\po	callen\041216\po-109	44.9525	12.4319							418.861				1442.9					2423.47			0.443994	2.73798		2.27009	4.58126	0.263107			203.473					117.376					323.394	0	323.394	#DIV/0!	46.5903	29.2542
Europe	Italy	Po River	Zhu et al., 2020, Earth and Planetary Science Letters, 536, p.116140.	callen\041216\po	callen\041216\po-015	44.9525	12.4319							420.97				749.303					1661.8			0.337124	3.8371		1.83365	4.53485	0.418476			149.449					92.8838					655.205	0	655.205	#DIV/0!	24.1945	20.2188
Europe	Italy	Po River	Zhu et al., 2020, Earth and Planetary Science Letters, 536, p.116140.	callen\041216\po	callen\041216\po-146	44.9525	12.4319							424.355				319.086					722.105				2.39499		1.17545	3.67238	0.406862			74.0282					35.4487					296.544	0	296.544	#DIV/0!	10.3031	8.83313
Europe	Portugal	Tagus River	Zhu et al., 2020, Earth and Planetary Science Letters, 536, p.116140.	ziyi zhu\180928\Tag2	ziyi zhu\180929\Tag2-067c	38.9227	-8.99893							429				582					957			0.035	15.44		2.56	4.98	1.52			90.2					52.4					74.1	0	74.1	#DIV/0!	18.7924	11.7907
Europe	Germany	Fehrman Island	Zhu et al., 2020, Earth and Planetary Science Letters, 536, p.116140.	callen\051012\e5	callen\051012\e5-043	53.9222	8.72222							431.167				373.105					1084.87				8.14088			6.98156	0.816531			111.852					45.1169					142.299	0	142.299	#DIV/0!	12.0473	13.2593
Europe	Italy	Po River	Zhu et al., 2020, Earth and Planetary Science Letters, 536, p.116140.	callen\041216\po	callen\041216\po-107	44.9525	12.4319							431.506				331.652					1103.25			0.182789	6.87873		1.90392	3.56168	1.22345			95.0947					63.0722					408.446	0	408.446	#DIV/0!	10.7088	13.451
Europe	Germany	Elbe River	Zhu et al., 2020, Earth and Planetary Science Letters, 536, p.116140.	ziyi zhu\180430\Elbe	ziyi zhu\180430\Elbe-015	53.831	8.82492							431.52				1921					3940			0.078	1.351		1.93		0.103			311					203.5					449	0	449	#DIV/0!	62.0278	47.4204
Europe	Hungary	Danube River	Zhu et al., 2020, Earth and Planetary Science Letters, 536, p.116140.	wang yan\070110\e2	wang yan\070110\E2-42	53.9222	8.72222							431.602				1076.41					3673.8				11.8819			10.5946	0.875305			324.514					185.543					670.381	0	670.381	#DIV/0!	34.7566	44.5434
Europe	France	Rhone River	Zhu et al., 2020, Earth and Planetary Science Letters, 536, p.116140.	wang yan\061213\e12	wang yan\061213\E12-043	53.9222	8.72222							433.7				894.686					2147.66				1.54927			4.51478	0.274111			173.522					127.852					272.143	0	272.143	#DIV/0!	28.8888	25.9994
Europe	Hungary	Danube River	Zhu et al., 2020, Earth and Planetary Science Letters, 536, p.116140.	callen\060215\e2	callen\060215\e2-036	53.9222	8.72222							433.911				1087.18					1672.1			0.0839726	3.39411			3.53684	0.14712			144.581					91.5648					796.274	0	796.274	#DIV/0!	35.1042	20.271
Europe	Poland	Oder River	Zhu et al., 2020, Earth and Planetary Science Letters, 536, p.116140.	CALLEN\060223\E3	CALLEN\060223\E3-074	53.9222	8.72222							435.026				234.311					585.691				3.62561			1.95755	0.481077			44.8402					50.7152					333.353	0	333.353	#DIV/0!	7.56576	7.196
Europe	Hungary	Danube River	Zhu et al., 2020, Earth and Planetary Science Letters, 536, p.116140.	callen\060215\e2	callen\060215\e2-028	53.9222	8.72222							436.239				1029.75					2372.82				2.35429			5.21208	0.201711			192.579					123.458					288.734	0	288.734	#DIV/0!	33.2499	28.6342
Europe	Germany	Rhine River	Zhu et al., 2020, Earth and Planetary Science Letters, 536, p.116140.	callen\060609\e10	callen\060609\e10-017	53.9222	8.72222							441.833				1584.24								0.0475646	0.577534			3.49998	0.101003			209.328					138.424					191.367	0	191.367	#DIV/0!	51.1541	2.10757
Europe	Hungary	Danube River	Zhu et al., 2020, Earth and Planetary Science Letters, 536, p.116140.	callen\060215\e2	callen\060215\e2-146	53.9222	8.72222							442.922				1862.1					3645.9			0.0410997	1.33246			10.2749	0.222831			318.986					159.616					289.366	0	289.366	#DIV/0!	60.1258	43.9659
Europe	Italy	Po River	Zhu et al., 2020, Earth and Planetary Science Letters, 536, p.116140.	callen\041216\po	callen\041216\po-094	44.9525	12.4319							443.723				466.913					1035.9				2.44067		1.43334	3.0237	0.219219			95.9972					55.7909					307.999	0	307.999	#DIV/0!	15.0763	12.6108
Europe	Portugal	Tagus River	Zhu et al., 2020, Earth and Planetary Science Letters, 536, p.116140.	ziyi zhu\180928\Tag2	ziyi zhu\180929\Tag2-086	38.9227	-8.99893							444.1				1677					3660			0.69	14.7		12.1	10.37	1.71			304					195.4					445.8	0	445.8	#DIV/0!	54.1492	44.4312
Europe	Poland	Vistula River	Zhu et al., 2020, Earth and Planetary Science Letters, 536, p.116140.	ziyi zhu\180501\Vis1	ziyi zhu\180501\Vis1-044	54.3587	18.9465							444.852				103					223.1			0.0116	2.16		0.247		0.063			15.29					26.13					183.4	0	183.4	#DIV/0!	3.3258	2.7706
Asia	India	Ganges	Zhu et al., 2020, Earth and Planetary Science Letters, 536, p.116140.	callen\030303\gan	callen\030303\gan29-m5	23.8544	89.4217							445.238				510.901									7.518		0.363225	1.51265	0.0947217			98.0131					91.0473					485.399	0	485.399	#DIV/0!	16.4966	1.19029
Europe	Italy	Po River	Zhu et al., 2020, Earth and Planetary Science Letters, 536, p.116140.	callen\041216\po	callen\041216\po-141	44.9525	12.4319							445.386				543.292					1148.85			0.0570097	2.91674		0.802818	2.67797	0.626873			99.3903					67.9962					430.54	0	430.54	#DIV/0!	17.5425	13.9718
Europe	France	Rhone River	Zhu et al., 2020, Earth and Planetary Science Letters, 536, p.116140.	wang yan\061213\e12	wang yan\061213\e12-193	53.9222	8.72222							445.878				318.817					1252.43				7.09887			3.18747	0.316325			109.532					77.1466					476.91	0	476.91	#DIV/0!	10.2944	15.2769
Europe	Germany	Rhine River	Zhu et al., 2020, Earth and Planetary Science Letters, 536, p.116140.	callen\060609\e10	callen\060609\e10-093	53.9222	8.72222							446.159				1513.21					2955.05				0.500644			3.85995	0.0736684			253.859					72.7325					561.857	0	561.857	#DIV/0!	48.8604	35.2477
Europe	Hungary	Danube River	Zhu et al., 2020, Earth and Planetary Science Letters, 536, p.116140.	callen\060215\e2	callen\060215\e2-080	53.9222	8.72222							446.459				1802.67					3836.61			0.21709	39.2213			8.04311	0.703664			317.272					199.435					1246.74	0	1246.74	#DIV/0!	58.2069	46.5881
Europe	Germany	Rhine River	Zhu et al., 2020, Earth and Planetary Science Letters, 536, p.116140.	callen\060609\e10	callen\060609\e10-043	53.9222	8.72222							447.212				1406.83					2790.11				0.278581			2.00835	0.0569772			182.005					142.676					652.467	0	652.467	#DIV/0!	45.4255	33.3358
Europe	Germany	Rhine River	Zhu et al., 2020, Earth and Planetary Science Letters, 536, p.116140.	callen\060609\e10	callen\060609\e10-003	53.9222	8.72222							447.347				784.437					1380.42			0.0453058	1.34252			3.9833	0.296623			117.81					81.46					178.037	0	178.037	#DIV/0!	25.3289	16.7567
Asia	India	Ganges River	Zhu et al., 2020, Earth and Planetary Science Letters, 536, p.116140.	CALLEN\011025\GR8	CALLEN\011025\GR8-062	23.8544	89.4217							447.446				532.511								0.140005	21.1117		10.5604	21.0094	0.55877			450.474					172.582					1080.79	0	1080.79	#DIV/0!	17.1944	4.12663
Europe	Germany	Rhine River	Zhu et al., 2020, Earth and Planetary Science Letters, 536, p.116140.	callen\060609\e10	callen\060609\e10-024	53.9222	8.72222							447.613				229.366					496.605			0.0481277	12.0946			3.35821	1.43304			49.1337					33.6042					94.4581	0	94.4581	#DIV/0!	7.40608	6.19892
Europe	Hungary	Danube River	Zhu et al., 2020, Earth and Planetary Science Letters, 536, p.116140.	callen\060215\e2	callen\060215\e2-142	53.9222	8.72222							449.945				406.726					1344			0.191347	3.53377			5.50807	0.682248			121.262					79.8492					281.136	0	281.136	#DIV/0!	13.1329	16.3884
Europe	France	Rhone River	Zhu et al., 2020, Earth and Planetary Science Letters, 536, p.116140.	wang yan\061213\e12	wang yan\061213\e12-065	53.9222	8.72222							450.575				666.373					2488.2				6.33058			9.52895	0.780761			234.6					127.482					539.125	0	539.125	#DIV/0!	21.5167	30.2746
Europe	Poland	Vistula River	Zhu et al., 2020, Earth and Planetary Science Letters, 536, p.116140.	ziyi zhu\180501\Vis2	ziyi zhu\180501\Vis2-010	54.3587	18.9465							451				1834					3610			0.0195	0.8		1.39		0.089			292					172					418	0	418	#DIV/0!	59.2186	43.4033
Europe	Germany	Rhine River	Zhu et al., 2020, Earth and Planetary Science Letters, 536, p.116140.	callen\060609\e10	callen\060609\e10-096	53.9222	8.72222							451.014				189.525					315.854				0.831476			1.35554	0.190093			25.7885					29.0753					79.161	0	79.161	#DIV/0!	6.11963	3.89395
Asia	India	Ganges River	Zhu et al., 2020, Earth and Planetary Science Letters, 536, p.116140.	CALLEN\011025\GR8	CALLEN\011025\GR8-011	23.8544	89.4217							451.095				595.351								0.123709	6.65481		3.00962	7.11193	0.278007			163.629					78.0369					678.3	0	678.3	#DIV/0!	19.2235	1.57125
Europe	Hungary	Danube River	Zhu et al., 2020, Earth and Planetary Science Letters, 536, p.116140.	wang yan\070110\e2	wang yan\070110\e2-08	53.9222	8.72222							451.718				696.816					2129.41				6.27196			4.58003	0.668099			182.709					125.094					295.905	0	295.905	#DIV/0!	22.4997	25.8717
Europe	Italy	Po River	Zhu et al., 2020, Earth and Planetary Science Letters, 536, p.116140.	callen\041216\po	callen\041216\po-039	44.9525	12.4319							452.154				291.372					1232.16			0.0735243	10.3865		1.10244	2.60277	0.38776			95.6787					91.1586					664.652	0	664.652	#DIV/0!	9.4082	15.0719
Europe	France	Rhone River	Zhu et al., 2020, Earth and Planetary Science Letters, 536, p.116140.	wang yan\061213\e12	wang yan\061213\e12-109	53.9222	8.72222							452.273				215.404					990.677				10.5643			2.90583	0.324647			81.3899					71.9166					412.018	0	412.018	#DIV/0!	6.95525	12.1524
Europe	Portugal	Tagus River	Zhu et al., 2020, Earth and Planetary Science Letters, 536, p.116140.	ziyi zhu\180501\Tag1	ziyi zhu\180501\Tag1-002	38.9227	-8.99893							452.9				375.7					849			0.0103	6.14		1.21		0.512			68.6					70.1					396.2	0	396.2	#DIV/0!	12.1311	10.4284
Europe	Italy	Po River	Zhu et al., 2020, Earth and Planetary Science Letters, 536, p.116140.	callen\041216\po	callen\041216\po-125	44.9525	12.4319							453.568				911.165					1341.11				0.599076		0.565255	1.6887	0.147232			104.77					91.1447					217.424	0	217.424	#DIV/0!	29.4209	16.2715
Europe	Germany	Rhine River	Zhu et al., 2020, Earth and Planetary Science Letters, 536, p.116140.	callen\060609\e10	callen\060609\e10-027	53.9222	8.72222							453.932				143.244								0.260538	10.1904			3.47379	1.17128			20.6945					3.8824					287.038	0	287.038	#DIV/0!	4.62525	0.254951
Europe	Italy	Po River	Zhu et al., 2020, Earth and Planetary Science Letters, 536, p.116140.	wang yan\070105\po	wang yan\070105\po-166	44.9525	12.4319							454.245				316.337								0.0657977	7.60663			6.01299	1.07141			134.345					82.3641					318.855	0	318.855	#DIV/0!	10.2143	1.39919
Europe	Poland	Oder River	Zhu et al., 2020, Earth and Planetary Science Letters, 536, p.116140.	CALLEN\060223\E3	CALLEN\060223\E3-137	53.9222	8.72222							454.306				144.436					566.006				8.68032			2.79706	0.508338			53.0102					29.4177					116.207	0	116.207	#DIV/0!	4.66373	6.94499
Europe	France	Rhone River	Zhu et al., 2020, Earth and Planetary Science Letters, 536, p.116140.	wang yan\061213\e12	wang yan\061213\e12-112	53.9222	8.72222							454.483				1372.42					2890.36				1.43101			8.89983	0.240595			278.694					98.5119					141.389	0	141.389	#DIV/0!	44.3143	34.8614
Europe	Italy	Po River	Zhu et al., 2020, Earth and Planetary Science Letters, 536, p.116140.	callen\041216\po	callen\041216\po-130	44.9525	12.4319							454.591				430.553					442.024				0.388213		0.63704	2.92717				79.0282					0.65958					175.662	0	175.662	#DIV/0!	13.9023	5.4889
Europe	France	Rhone River	Zhu et al., 2020, Earth and Planetary Science Letters, 536, p.116140.	wang yan\061213\e12	wang yan\061213\e12-175	53.9222	8.72222							454.624				1189.52					2251.7				0.519222			3.33813				186.026					118.141					148.653	0	148.653	#DIV/0!	38.4087	27.1742
Europe	Germany	Elbe River	Zhu et al., 2020, Earth and Planetary Science Letters, 536, p.116140.	ziyi zhu\180430\Elbe	ziyi zhu\180430\Elbe-141	53.831	8.82492							454.772				1538					3280				1.26		1.83		0.245			298					159.5					491	0	491	#DIV/0!	49.661	39.664
Europe	France	Rhone River	Zhu et al., 2020, Earth and Planetary Science Letters, 536, p.116140.	wang yan\061213\e12	wang yan\061213\e12-026	53.9222	8.72222							455.298				498.161					2319.24				13.7251			8.63103	0.585788			215.517					88.6756					433.954	0	433.954	#DIV/0!	16.0853	28.0804
Europe	Germany	Rhine River	Zhu et al., 2020, Earth and Planetary Science Letters, 536, p.116140.	callen\060609\e10	callen\060609\e10-071	53.9222	8.72222							455.573				142.781					1096.1			0.0787243	10.342			7.1958	1.97733			87.0483					54.4825					169.903	0	169.903	#DIV/0!	4.61029	13.3118
Europe	France	Rhone River	Zhu et al., 2020, Earth and Planetary Science Letters, 536, p.116140.	wang yan\061213\e12	wang yan\061213\e12-020	53.9222	8.72222							456.772				1164.74					2568.62			0.135168	1.72384			6.84952	0.286116			233.7					117.95					339.856	0	339.856	#DIV/0!	37.6087	31.0662
Europe	Germany	Rhine River	Zhu et al., 2020, Earth and Planetary Science Letters, 536, p.116140.	callen\060609\e10	callen\060609\E10-150	53.9222	8.72222							457.05				413.065					1316.96				7.76068			7.23055	0.658063			111.66					43.9609					144.88	0	144.88	#DIV/0!	13.3376	15.8601
Europe	Poland	Vistula River	Zhu et al., 2020, Earth and Planetary Science Letters, 536, p.116140.	ziyi zhu\180501\Vis2	ziyi zhu\180501\Vis2-068	54.3587	18.9465							457.354				1033					2229			0.035	2.39		1.4		0.235			185.2					149.7					444	0	444	#DIV/0!	33.3549	27.0968
Asia	India	Ganges River	Zhu et al., 2020, Earth and Planetary Science Letters, 536, p.116140.	CALLEN\011025\GR8	CALLEN\011025\GR8-003	23.8544	89.4217							457.519				1439.74								0.165145	3.02989		3.88196	9.53579	0.44708			241.142					109.082					261.487	0	261.487	#DIV/0!	46.4882	2.22336
Europe	France	Rhone River	Zhu et al., 2020, Earth and Planetary Science Letters, 536, p.116140.	wang yan\061213\e12	wang yan\061213\e12-153-1	53.9222	8.72222							458.541				1444.26					2803.94				0.541846			3.91214				247.446					130.975					366.184	0	366.184	#DIV/0!	46.634	33.8414
Europe	Italy	Po River	Zhu et al., 2020, Earth and Planetary Science Letters, 536, p.116140.	callen\041216\po	callen\041216\po-104	44.9525	12.4319							458.608				978.162					1767.65				2.05997		1.23192	3.5289				149.433					98.6319					551.653	0	551.653	#DIV/0!	31.5842	21.4135
Europe	Hungary	Danube River	Zhu et al., 2020, Earth and Planetary Science Letters, 536, p.116140.	callen\060215\e2	callen\060215\e2-069	53.9222	8.72222							459.287				1510.38					2778.33			0.0426952	0.806429			5.90849	0.134078			239.864					149.393					227.091	0	227.091	#DIV/0!	48.7691	33.6283
Europe	France	Rhone River	Zhu et al., 2020, Earth and Planetary Science Letters, 536, p.116140.	wang yan\061213\e12	wang yan\061213\e12-018	53.9222	8.72222							459.453				831.172					1497.28				0.770986			5.25293	0.146984			145.455					63.0569					179.786	0	179.786	#DIV/0!	26.838	18.1391
Europe	Italy	Po River	Zhu et al., 2020, Earth and Planetary Science Letters, 536, p.116140.	wang yan\070105\po	wang yan\070105\po-188	44.9525	12.4319							459.713				1365.67									1.29381			9.13618	0.198365			218.554					107.701					154.116	0	154.116	#DIV/0!	44.0967	2.03167
Europe	Germany	Rhine River	Zhu et al., 2020, Earth and Planetary Science Letters, 536, p.116140.	callen\060609\e10	callen\060609\e10-059	53.9222	8.72222							459.804				1018.61					1739.1			0.0848343	0.894584			4.80889	0.268425			163.936					74.4123					237.84	0	237.84	#DIV/0!	32.8902	21.0373
Europe	France	Rhone River	Zhu et al., 2020, Earth and Planetary Science Letters, 536, p.116140.	wang yan\061213\e12	wang yan\061213\e12-153-2	53.9222	8.72222							459.881				1421.15					2753.38				0.544978			3.81843				243.243					129.229					364.449	0	364.449	#DIV/0!	45.8879	33.2362
Europe	Italy	Po River	Zhu et al., 2020, Earth and Planetary Science Letters, 536, p.116140.	wang yan\070105\po	wang yan\070105\po-172	44.9525	12.4319							460.248				326.748									2.30711			2.33067	0.138669			78.8658					54.5093					256.653	0	256.653	#DIV/0!	10.5505	0.829686
Europe	Italy	Po River	Zhu et al., 2020, Earth and Planetary Science Letters, 536, p.116140.	callen\041216\po	callen\041216\po-124	44.9525	12.4319							460.751				244.824					397.975			0.0623662	7.60226		0.621208	1.34137	0.246622			34.0318					20.8342					89.9863	0	89.9863	#DIV/0!	7.90521	4.8747
Europe	Germany	Rhine River	Zhu et al., 2020, Earth and Planetary Science Letters, 536, p.116140.	callen\060609\e10	callen\060609\e10-083	53.9222	8.72222							461.179				300					535.537			0.0679561	4.64121			1.42494	0.331421			43.6416					39.2755					70.9302	0	70.9302	#DIV/0!	9.68678	6.56231
Europe	Germany	Elbe River	Zhu et al., 2020, Earth and Planetary Science Letters, 536, p.116140.	ziyi zhu\180430\Elbe	ziyi zhu\180430\Elbe-014	53.831	8.82492							461.2				1291					2417				1.018		2.69		0.172			221.1					130.1					201.3	0	201.3	#DIV/0!	41.6855	29.3189
Europe	France	Rhone River	Zhu et al., 2020, Earth and Planetary Science Letters, 536, p.116140.	wang yan\061213\e12	wang yan\061213\e12-056	53.9222	8.72222							461.589				1019.33					2037.87				0.879136			3.14573	0.15588			175.25					100.735					226.6	0	226.6	#DIV/0!	32.9135	24.6055
Europe	France	Rhone River	Zhu et al., 2020, Earth and Planetary Science Letters, 536, p.116140.	wang yan\061213\e12	wang yan\061213\e12-097	53.9222	8.72222							462.779				1053.34					2171.01				0.990371			5.80221	0.356749			188.664					118.192					287.057	0	287.057	#DIV/0!	34.0117	26.3051
Europe	Germany	Elbe River	Zhu et al., 2020, Earth and Planetary Science Letters, 536, p.116140.	ziyi zhu\180430\Elbe	ziyi zhu\180430\Elbe-080	53.831	8.82492							464				1220					2296				0.52		0.8		0.047			177.1					125.7					209.2	0	209.2	#DIV/0!	39.393	27.6445
Europe	Italy	Po River	Zhu et al., 2020, Earth and Planetary Science Letters, 536, p.116140.	wang yan\070105\po	wang yan\070105\po-183	44.9525	12.4319							464.436				1010.31								0.0454091	0.478272			2.51114	0.0886774			146.424					98.4543					200.014	0	200.014	#DIV/0!	32.6223	1.48469
Europe	Hungary	Danube River	Zhu et al., 2020, Earth and Planetary Science Letters, 536, p.116140.	wang yan\070110\e2	wang yan\070110\E2-29	53.9222	8.72222							464.571				436.089					1194.83				4.53371			4.53892	0.347692			106.738					72.3642					214.323	0	214.323	#DIV/0!	14.081	14.5754
Europe	Germany	Rhine River	Zhu et al., 2020, Earth and Planetary Science Letters, 536, p.116140.	callen\060609\e10	callen\060609\e10-090	53.9222	8.72222							464.625				482.196					1513.07				4.67907			5.19614	0.31443			122.491					61.5829					203.01	0	203.01	#DIV/0!	15.5698	18.1956
Asia	India	Ganges River	Zhu et al., 2020, Earth and Planetary Science Letters, 536, p.116140.	CALLEN\011025\GR8	CALLEN\011025\GR8-020	23.8544	89.4217							465.278				1058.4									0.666076		1.35978	3.32448	0.490891			125.033					31.8326					585.522	0	585.522	#DIV/0!	34.1751	0.990851
Asia	India	Ganges River	Zhu et al., 2020, Earth and Planetary Science Letters, 536, p.116140.	CALLEN\011025\GR9	CALLEN\011025\GR9-072	23.8544	89.4217							465.573				549.001									0.321624		0.629543	2.57517	0.24565			133.479					49.7156					778.114	0	778.114	#DIV/0!	17.7269	1.1309
Europe	Germany	Elbe River	Zhu et al., 2020, Earth and Planetary Science Letters, 536, p.116140.	ziyi zhu\180430\Elbe	ziyi zhu\180430\Elbe-105	53.831	8.82492							466				486					1291			0.066	24.1		1.68		0.73			114.4					74.1					333.5	0	333.5	#DIV/0!	15.6926	15.8383
Europe	Germany	Elbe River	Zhu et al., 2020, Earth and Planetary Science Letters, 536, p.116140.	ziyi zhu\180430\Elbe	ziyi zhu\180430\Elbe-127	53.831	8.82492							467.074				718					1763			0.007	2.17		2.63		0.2			162.9					97.7					270.2	0	270.2	#DIV/0!	23.1837	21.4271
Europe	Germany	Rhine River	Zhu et al., 2020, Earth and Planetary Science Letters, 536, p.116140.	callen\060609\e10	callen\060609\e10-076	53.9222	8.72222							468.378				780.854					1552.83			0.0671236	3.069			3.63771	0.328115			127.174					91.1472					397.883	0	397.883	#DIV/0!	25.2132	18.8193
Europe	Germany	Elbe River	Zhu et al., 2020, Earth and Planetary Science Letters, 536, p.116140.	ziyi zhu\180430\Elbe	ziyi zhu\180430\Elbe-034	53.831	8.82492							468.784				1209					1709			0.79	6.6		4.45		0.73			139.3					120.8					712	0	712	#DIV/0!	39.0378	20.8598
Europe	Portugal	Tagus River	Zhu et al., 2020, Earth and Planetary Science Letters, 536, p.116140.	ziyi zhu\180501\Tag1	ziyi zhu\180501\Tag1-014	38.9227	-8.99893							468.8				1295					4660			0.331	9.98		11.02		0.857			437					208.8					609	0	609	#DIV/0!	41.8147	56.4565
Europe	Italy	Po River	Zhu et al., 2020, Earth and Planetary Science Letters, 536, p.116140.	callen\041216\po	callen\041216\po-063	44.9525	12.4319							468.964				774.038					2692.47			0.133721	8.31355		5.13444	10.7282	0.539125			257.429					121.359					512.069	0	512.069	#DIV/0!	24.9932	32.7349
Europe	Germany	Elbe River	Zhu et al., 2020, Earth and Planetary Science Letters, 536, p.116140.	ziyi zhu\180430\Elbe	ziyi zhu\180430\Elbe-043	53.831	8.82492							471.88				109.1					235.9			0.267	1.79		0.47		0.169			16.83					20.97					35.7	0	35.7	#DIV/0!	3.52276	2.89601
Europe	France	Rhone River	Zhu et al., 2020, Earth and Planetary Science Letters, 536, p.116140.	wang yan\061213\e12	wang yan\061213\e12-012	53.9222	8.72222							472.434				1401.79					2568.6				0.985293			4.45218	0.20538			220.839					138.699					257.597	0	257.597	#DIV/0!	45.2628	31.0827
Asia	India	Ganges River	Zhu et al., 2020, Earth and Planetary Science Letters, 536, p.116140.	CALLEN\011025\GR9	CALLEN\011025\GR9-053	23.8544	89.4217							472.928				494.951									18.9621		1.61379	4.97459	0.610289			209.82					128.279					863.608	0	863.608	#DIV/0!	15.9816	2.20785
Europe	Portugal	Tagus River	Zhu et al., 2020, Earth and Planetary Science Letters, 536, p.116140.	ziyi zhu\180928\Tag2	ziyi zhu\180928\Tag2-017	38.9227	-8.99893							472.951				1306					2512			0.078	4.49		1.27	3.44	0.228			195.2					147					281.8	0	281.8	#DIV/0!	42.1698	30.3635
Europe	Poland	Vistula River	Zhu et al., 2020, Earth and Planetary Science Letters, 536, p.116140.	ziyi zhu\180501\Vis2	ziyi zhu\180501\Vis2-021	54.3587	18.9465							473.03				216.1					999			0.0142	16.09		4.59		1.84			99.6					49.56					90	0	90	#DIV/0!	6.97772	12.2924
Europe	Poland	Vistula River	Zhu et al., 2020, Earth and Planetary Science Letters, 536, p.116140.	ziyi zhu\180501\Vis1	ziyi zhu\180501\Vis1-033	54.3587	18.9465							473.1				1077					1915			0.0102	1.115		3.48		0.345			184.2					94.5					146.3	0	146.3	#DIV/0!	34.7756	23.249
Europe	Italy	Po River	Zhu et al., 2020, Earth and Planetary Science Letters, 536, p.116140.	callen\041216\po	callen\041216\po-117	44.9525	12.4319							473.471				646.088					874.239			0.0580127	2.10829		0.564208	1.67496	0.255382			86.0059					45.4704					199.831	0	199.831	#DIV/0!	20.8618	10.6553
Europe	Portugal	Tagus River	Zhu et al., 2020, Earth and Planetary Science Letters, 536, p.116140.	ziyi zhu\180928\Tag2	ziyi zhu\180928\Tag2-025	38.9227	-8.99893							473.495				1523					2609			0.78	40.1		3.4	3.74	0.82			196					169					412	0	412	#DIV/0!	49.1766	31.8651
Europe	France	Rhone River	Zhu et al., 2020, Earth and Planetary Science Letters, 536, p.116140.	wang yan\061213\e12	wang yan\061213\e12-074	53.9222	8.72222							473.624				1504.33					2913.22				0.466824			3.43345	0.144527			229.289					161.241					457.694	0	457.694	#DIV/0!	48.5736	35.1291
Europe	France	Rhone River	Zhu et al., 2020, Earth and Planetary Science Letters, 536, p.116140.	wang yan\061213\e12	wang yan\061213\e12-092	53.9222	8.72222							474.014				303.762					464.107				0.726566			1.28854				40.3253					29.2442					110.016	0	110.016	#DIV/0!	9.80826	5.64957
Europe	Hungary	Danube River	Zhu et al., 2020, Earth and Planetary Science Letters, 536, p.116140.	wang yan\070110\e2	wang yan\070110\E2-43	53.9222	8.72222							474.132				249.62					1553.26				7.33249			4.26513	0.633192			119.038					99.282					481.632	0	481.632	#DIV/0!	8.06004	18.8567
Europe	Hungary	Danube River	Zhu et al., 2020, Earth and Planetary Science Letters, 536, p.116140.	callen\060215\e2	callen\060215\e2-116	53.9222	8.72222							475.023				1926.57					2596.51				1.00485			2.3662	0.0671389			206.461					193.872					458.334	0	458.334	#DIV/0!	62.2075	31.6088
Asia	India	Ganges River	Zhu et al., 2020, Earth and Planetary Science Letters, 536, p.116140.	CALLEN\011025\GR8	CALLEN\011025\GR8-070	23.8544	89.4217							475.175				719.355									0.390124		0.936515	2.37027				125.035					56.3469					670.452	0	670.452	#DIV/0!	23.2275	1.11647
Europe	Italy	Po River	Zhu et al., 2020, Earth and Planetary Science Letters, 536, p.116140.	callen\041216\po	callen\041216\po-008	44.9525	12.4319							475.231				1289.13					2952.89				0.629258		1.20936	4.26063				266.522					123.755					685.509	0	685.509	#DIV/0!	41.6252	35.6044
Europe	Italy	Po River	Zhu et al., 2020, Earth and Planetary Science Letters, 536, p.116140.	callen\041216\po	callen\041216\po-040	44.9525	12.4319							476.275				809.392					2180.21				5.47011		1.51991	4.35723	0.405376			183.627					133.379					454.983	0	454.983	#DIV/0!	26.1347	26.4976
Europe	Poland	Oder River	Zhu et al., 2020, Earth and Planetary Science Letters, 536, p.116140.	CALLEN\060223\E3	CALLEN\060223\E3-090	53.9222	8.72222							476.928				141.061					590.154				2.16663			1.91062	0.191448			55.3575					33.1718					97.362	0	97.362	#DIV/0!	4.55476	7.19804
Europe	Hungary	Danube River	Zhu et al., 2020, Earth and Planetary Science Letters, 536, p.116140.	wang yan\070110\e2	wang yan\070110\E2-48	53.9222	8.72222							477.035				1266.55					2495.73				0.746658			2.86982				199.004					125.722					300.318	0	300.318	#DIV/0!	40.8962	30.0409
Asia	India	Ganges River	Zhu et al., 2020, Earth and Planetary Science Letters, 536, p.116140.	CALLEN\011025\GR9	CALLEN\011025\GR9-063	23.8544	89.4217							477.085				567.927									6.95595		1.6771	4.81024	0.527605			152.934					83.424					161.912	0	161.912	#DIV/0!	18.338	1.51457
Europe	Poland	Vistula River	Zhu et al., 2020, Earth and Planetary Science Letters, 536, p.116140.	ziyi zhu\180501\Vis2	ziyi zhu\180501\Vis2-096	54.3587	18.9465							477.4				926					1754			0.0176	1.12		0.75		0.073			147.6					89					219	0	219	#DIV/0!	29.8999	21.1607
Europe	Germany	Rhine River	Zhu et al., 2020, Earth and Planetary Science Letters, 536, p.116140.	callen\060609\e10	callen\060609\E10-131	53.9222	8.72222							477.411				1878.27					3287.1			0.0564974	0.477806			3.25797	0.0746235			253.548					178.259					384.051	0	384.051	#DIV/0!	60.648	39.5802
Europe	France	Rhone River	Zhu et al., 2020, Earth and Planetary Science Letters, 536, p.116140.	wang yan\061213\e12	wang yan\061213\e12-036	53.9222	8.72222							477.713				1326.1					2503.01				1.18832			6.78648	0.226271			220.594					141.564					297.955	0	297.955	#DIV/0!	42.8188	30.3769
Europe	Italy	Po River	Zhu et al., 2020, Earth and Planetary Science Letters, 536, p.116140.	callen\041216\po	callen\041216\po-112	44.9525	12.4319							477.919				1176.26					1707.03				1.12769		1.5632	4.67266				152.811					82.6414					75.752	0	75.752	#DIV/0!	37.9807	20.6643
Europe	Poland	Vistula River	Zhu et al., 2020, Earth and Planetary Science Letters, 536, p.116140.	ziyi zhu\180501\Vis2	ziyi zhu\180501\Vis2-042	54.3587	18.9465							477.927				165.1					533				9.09		0.9		0.319			45.8					31.5					100.5	0	100.5	#DIV/0!	5.33097	6.53057
Europe	Italy	Po River	Zhu et al., 2020, Earth and Planetary Science Letters, 536, p.116140.	callen\041216\po	callen\041216\po-049	44.9525	12.4319							478.047				217.114					742.979				3.58203		0.616572	1.30216	0.174762			53.265					65.5841					409.75	0	409.75	#DIV/0!	7.01045	9.09967
Asia	India	Ganges River	Zhu et al., 2020, Earth and Planetary Science Letters, 536, p.116140.	CALLEN\011025\GR8	CALLEN\011025\GR8-068	23.8544	89.4217							478.119				496.602								0.144474	2.29716		1.37777	1.48095	0.0832954			74.8426					43.0307					622.964	0	622.964	#DIV/0!	16.0349	0.743845
Europe	Poland	Vistula River	Zhu et al., 2020, Earth and Planetary Science Letters, 536, p.116140.	ziyi zhu\180501\Vis2	ziyi zhu\180501\Vis2-105	54.3587	18.9465							478.79				860					2390			0.0139	4.33		1.37		0.133			204					140					529	0	529	#DIV/0!	27.7688	28.9809
Europe	Poland	Vistula River	Zhu et al., 2020, Earth and Planetary Science Letters, 536, p.116140.	ziyi zhu\180501\Vis1	ziyi zhu\180501\Vis1-042	54.3587	18.9465							479.232				532					820			0.036	0.5		0.49		0.071			79.3					21.7					320	0	320	#DIV/0!	17.1779	9.84354
Europe	Italy	Po River	Zhu et al., 2020, Earth and Planetary Science Letters, 536, p.116140.	wang yan\070105\po	wang yan\070105\po-160	44.9525	12.4319							480.513				1192.46								0.0412093	0.395782			2.95026	0.115026			176.009					100.632					261.09	0	261.09	#DIV/0!	38.5038	1.68167
Europe	Germany	Rhine River	Zhu et al., 2020, Earth and Planetary Science Letters, 536, p.116140.	callen\060609\e10	callen\060609\e10-062	53.9222	8.72222							480.741				1169.96					1785.35			0.0581965	1.66664			6.8072	0.19735			174.024					92.9558					264.337	0	264.337	#DIV/0!	37.7771	21.7437
Europe	Germany	Rhine River	Zhu et al., 2020, Earth and Planetary Science Letters, 536, p.116140.	callen\060609\e10	callen\060609\E10-119	53.9222	8.72222							481.386				885.45								0.0448907	0.329158			2.12131	0.0763038			137.081					11.5903					147.573	0	147.573	#DIV/0!	28.5906	0.927084
Europe	Italy	Po River	Zhu et al., 2020, Earth and Planetary Science Letters, 536, p.116140.	callen\041216\po	callen\041216\po-147	44.9525	12.4319							481.975				1389.62					2214.67			0.0736259	0.566287		0.745153	2.79596				174.242					128.164					273.601	0	273.601	#DIV/0!	44.8697	26.7449
Europe	Italy	Po River	Zhu et al., 2020, Earth and Planetary Science Letters, 536, p.116140.	wang yan\070105\po	wang yan\070105\po-162	44.9525	12.4319							482.337				805.844								0.322474	5.96551			4.59996	0.520864			125.244					80.2869					1003.3	0	1003.3	#DIV/0!	26.0201	1.30843
Asia	India	Ganges River	Zhu et al., 2020, Earth and Planetary Science Letters, 536, p.116140.	CALLEN\011025\GR8	CALLEN\011025\GR8-029	23.8544	89.4217							482.5				365.554								0.144562	24.7824		1.6829	2.78004	0.927397			77.8922					80.7708					545.854	0	545.854	#DIV/0!	11.8035	1.15507
Europe	Italy	Po River	Zhu et al., 2020, Earth and Planetary Science Letters, 536, p.116140.	callen\041216\po	callen\041216\po-095	44.9525	12.4319							483.073				1280.79					1875.49				0.27011			1.50439	0.114197			138.396					124.796					370.995	0	370.995	#DIV/0!	41.356	22.6741
Europe	France	Rhone River	Zhu et al., 2020, Earth and Planetary Science Letters, 536, p.116140.	wang yan\061213\e12	wang yan\061213\e12-183	53.9222	8.72222							484.189				936.452					2301.6			0.0570058	1.9851			9.27207	0.410621			222.13					113.892					253.253	0	253.253	#DIV/0!	30.2374	27.9865
Europe	Italy	Po River	Zhu et al., 2020, Earth and Planetary Science Letters, 536, p.116140.	callen\041216\po	callen\041216\po-101	44.9525	12.4319							484.656				249.023					2212.55				6.47155		3.92089	8.52385	1.49012			214.973					89.4393					176.831	0	176.831	#DIV/0!	8.04079	26.8619
Asia	India	Ganges River	Zhu et al., 2020, Earth and Planetary Science Letters, 536, p.116140.	CALLEN\011025\GR9	CALLEN\011025\GR9-052	23.8544	89.4217							487.53				654.264									6.61383		1.95996	4.04571	0.500297			127.225					78.4821					150.185	0	150.185	#DIV/0!	21.1257	1.32238
Asia	India	Ganges	Zhu et al., 2020, Earth and Planetary Science Letters, 536, p.116140.	callen\030820\gr8	callen\030820\gr8-7	23.8544	89.4217							488.204				820.039									9.12256		1.16561	4.18972	0.227005			192.177					109.277					295.733	0	295.733	#DIV/0!	26.4785	1.90962
Europe	France	Rhone River	Zhu et al., 2020, Earth and Planetary Science Letters, 536, p.116140.	wang yan\061213\e12	wang yan\061213\e12-083	53.9222	8.72222							488.278				737.576					852.628				1.14839			0.561157				61.6856					116.581					419.769	0	419.769	#DIV/0!	23.8158	10.6486
Asia	India	Ganges River	Zhu et al., 2020, Earth and Planetary Science Letters, 536, p.116140.	CALLEN\011025\GR9	CALLEN\011025\GR9-018	23.8544	89.4217							489.794				259.955									7.78878		1.02952	1.79851	0.367377			61.8863					41.5929					300.241	0	300.241	#DIV/0!	8.39376	0.695622
Asia	India	Ganges	Zhu et al., 2020, Earth and Planetary Science Letters, 536, p.116140.	callen\030820\gr8	callen\030820\gr8-25	23.8544	89.4217							489.832				614.775									2.08872		1.17953	3.43369	0.190654			102.851					66.7355					281.691	0	281.691	#DIV/0!	19.8507	1.06145
Europe	France	Rhone River	Zhu et al., 2020, Earth and Planetary Science Letters, 536, p.116140.	wang yan\061213\e12	wang yan\061213\e12-111	53.9222	8.72222							491.273				272.491					815.042				5.57818			3.26549	0.31983			75.2906					43.0818					271.677	0	271.677	#DIV/0!	8.79855	9.94122
Europe	Portugal	Tagus River	Zhu et al., 2020, Earth and Planetary Science Letters, 536, p.116140.	ziyi zhu\180928\Tag2	ziyi zhu\180929\Tag2-105	38.9227	-8.99893							491.5				856					1760			0.065	1.05		5.11	14.4	0.277			209					51.3					220.6	0	220.6	#DIV/0!	27.6397	21.5178
Europe	Germany	Rhine River	Zhu et al., 2020, Earth and Planetary Science Letters, 536, p.116140.	callen\060609\e10	callen\060609\E10-135	53.9222	8.72222							492.52				243.161									3.69938			4.91573	0.303653			74.6675					30.6053					195.274	0	195.274	#DIV/0!	7.8515	0.695467
Asia	India	Indus River	Zhu et al., 2020, Earth and Planetary Science Letters, 536, p.116140.	CALLEN\010827\IND	CALLEN\010827\IND-002	24.2079	67.7327							492.795				962.279								0.0675373	2.71887		2.09745	0.178272	177.368			294.525					101.767					427.833	0	427.833	#DIV/0!	31.0713	3.5965
Europe	Portugal	Tagus River	Zhu et al., 2020, Earth and Planetary Science Letters, 536, p.116140.	ziyi zhu\180928\Tag2	ziyi zhu\180928\Tag2-036	38.9227	-8.99893							494.1				301					350			0.177	2.45		1.37	1.55	0.44			26.4					41.6					577	0	577	#DIV/0!	9.71908	4.37865
Europe	Germany	Rhine River	Zhu et al., 2020, Earth and Planetary Science Letters, 536, p.116140.	callen\060609\e10	callen\060609\e10-009	53.9222	8.72222							494.268				1222.23					2109.59				0.903802			5.89902	0.196684			175.437					99.0924					218.031	0	218.031	#DIV/0!	39.4648	25.4228
Europe	Germany	Elbe River	Zhu et al., 2020, Earth and Planetary Science Letters, 536, p.116140.	ziyi zhu\180430\Elbe	ziyi zhu\180430\Elbe-071	53.831	8.82492							494.3				420					1173				7.58		1.44		0.499			101.7					68.9					216	0	216	#DIV/0!	13.5615	14.2815
Europe	Germany	Rhine River	Zhu et al., 2020, Earth and Planetary Science Letters, 536, p.116140.	callen\060609\e10	callen\060609\E10-149	53.9222	8.72222							494.582				488.518								0.0636864	2.01535			0.833863	0.150506			39.4024					56.3692					172.587	0	172.587	#DIV/0!	15.7739	0.585964
Europe	Germany	Rhine River	Zhu et al., 2020, Earth and Planetary Science Letters, 536, p.116140.	callen\060609\e10	callen\060609\e10-039	53.9222	8.72222							498.761				240.713					486.724				8.0745			2.91155	0.287083			49.8007					21.4456					93.1786	0	93.1786	#DIV/0!	7.77245	5.98286
Europe	Germany	Rhine River	Zhu et al., 2020, Earth and Planetary Science Letters, 536, p.116140.	callen\060609\e10	callen\060609\e10-068	53.9222	8.72222							499.269				142.019					300.289			0.0322284	10.2875			2.01572	0.142703			41.2832					19.5342					221.004	0	221.004	#DIV/0!	4.58571	3.8315
Europe	Poland	Oder River	Zhu et al., 2020, Earth and Planetary Science Letters, 536, p.116140.	CALLEN\060223\E3	CALLEN\060223\E3-103	53.9222	8.72222							499.307				272.018					988.792				4.79348			4.57058	0.621565			95.055					47.5351					93.4723	0	93.4723	#DIV/0!	8.78328	12.0478
Asia	India	Indus River	Zhu et al., 2020, Earth and Planetary Science Letters, 536, p.116140.	CALLEN\010827\IND	CALLEN\010827\IND-076	24.2079	67.7327							500.246				184.559								0.0762797	11.2576		1.18574	0.275972	38.2305			57.4029					20.5928					70.3688	0	70.3688	#DIV/0!	5.95927	0.813399
Europe	Portugal	Tagus River	Zhu et al., 2020, Earth and Planetary Science Letters, 536, p.116140.	ziyi zhu\180928\Tag2	ziyi zhu\180928\Tag2-040	38.9227	-8.99893							501.1				493					1171			0.013	8.36		0.63	1.87	0.139			85					95.6					1021	0	1021	#DIV/0!	15.9186	14.3189
Europe	Germany	Rhine River	Zhu et al., 2020, Earth and Planetary Science Letters, 536, p.116140.	callen\060609\e10	callen\060609\e10-078	53.9222	8.72222							502.667				333.396					984.277			0.0515925	4.49611			2.71645	0.559633			86.1662					57.9301					253.53	0	253.53	#DIV/0!	10.7651	11.9872
Europe	France	Rhone River	Zhu et al., 2020, Earth and Planetary Science Letters, 536, p.116140.	wang yan\061213\e12	wang yan\061213\e12-147	53.9222	8.72222							503.61				614.576					1162				7.10719			2.68773	0.902963			92.9124					99.761					412.988	0	412.988	#DIV/0!	19.8443	14.2873
Europe	Germany	Elbe River	Zhu et al., 2020, Earth and Planetary Science Letters, 536, p.116140.	ziyi zhu\180430\Elbe	ziyi zhu\180430\Elbe-106	53.831	8.82492							504.208				732					1315			0.038	1.032		1.55		0.208			118.7					77.9					112.8	0	112.8	#DIV/0!	23.6358	15.9873
Asia	India	Ganges River	Zhu et al., 2020, Earth and Planetary Science Letters, 536, p.116140.	CALLEN\011025\GR8	CALLEN\011025\GR8-053	23.8544	89.4217							505.847				453.723									0.964148		0.935012	3.01276	0.259731			107.456					38.189					593.432	0	593.432	#DIV/0!	14.6504	0.914594
Europe	Hungary	Danube River	Zhu et al., 2020, Earth and Planetary Science Letters, 536, p.116140.	callen\060215\e2	callen\060215\e2-002	53.9222	8.72222							506.444				843.017					553.678			0.136361	14.4488			2.63279	0.439269			52.7002					25.0586					188.102	0	188.102	#DIV/0!	27.2204	6.82011
Europe	Germany	Elbe River	Zhu et al., 2020, Earth and Planetary Science Letters, 536, p.116140.	ziyi zhu\180430\Elbe	ziyi zhu\180430\Elbe-150	53.831	8.82492							507.312				1813					4090			0.0183	2.09		3.52		0.258			359					191					164	0	164	#DIV/0!	58.5405	49.3486
Europe	Germany	Rhine River	Zhu et al., 2020, Earth and Planetary Science Letters, 536, p.116140.	callen\060609\e10	callen\060609\E10-141	53.9222	8.72222							508.156				652.638								0.0445218	47.295			4.55635	0.736367			111.425					91.7798					674.503	0	674.503	#DIV/0!	21.0732	1.58319
Europe	Portugal	Tagus River	Zhu et al., 2020, Earth and Planetary Science Letters, 536, p.116140.	ziyi zhu\180928\Tag2	ziyi zhu\180928\Tag2-016	38.9227	-8.99893							510				830					1332			0.028	3.2		0.58	1.49	0.139			103.3					116					557	0	557	#DIV/0!	26.8001	16.3196
Asia	India	Ganges River	Zhu et al., 2020, Earth and Planetary Science Letters, 536, p.116140.	CALLEN\011025\GR8	CALLEN\011025\GR8-015	23.8544	89.4217							510.725				337.474									8.2901		0.992419	2.1401	0.415269			49.2711					38.8381					139.644	0	139.644	#DIV/0!	10.8968	0.608155
Europe	Poland	Vistula River	Zhu et al., 2020, Earth and Planetary Science Letters, 536, p.116140.	ziyi zhu\180501\Vis2	ziyi zhu\180501\Vis2-061	54.3587	18.9465							511.7				1622					3130			0.0276	1.57		2.64		0.178			275					163.9					279	0	279	#DIV/0!	52.3733	37.8679
Europe	Poland	Vistula River	Zhu et al., 2020, Earth and Planetary Science Letters, 536, p.116140.	ziyi zhu\180501\Vis1	ziyi zhu\180501\Vis1-024	54.3587	18.9465							511.8				1741					3173			0.0207	1.09		0.99		0.095			240.6					207					441	0	441	#DIV/0!	56.2157	38.3707
Asia	India	Indus River	Zhu et al., 2020, Earth and Planetary Science Letters, 536, p.116140.	CALLEN\010827\IND	CALLEN\010827\IND-049	24.2079	67.7327							512.343				86.1562								0.0861342	78.1864		3.02677	1.90539	103.693			251.809					184.49					4759.84	0	4759.84	#DIV/0!	2.78192	3.87837
Europe	Portugal	Tagus River	Zhu et al., 2020, Earth and Planetary Science Letters, 536, p.116140.	ziyi zhu\180928\Tag2	ziyi zhu\180928\Tag2-004	38.9227	-8.99893							514.3				1369					4470			0.217	5.38		11.12	21.2	0.85			443					203					755	0	755	#DIV/0!	44.2041	54.431
Europe	Portugal	Tagus River	Zhu et al., 2020, Earth and Planetary Science Letters, 536, p.116140.	ziyi zhu\180928\Tag2	ziyi zhu\180929\Tag2-058	38.9227	-8.99893							515.236				640					1133			0.033	9.11		1.19	2.59	0.46			88.5					91.3					737	0	737	#DIV/0!	20.6652	13.9047
Asia	India	Indus River	Zhu et al., 2020, Earth and Planetary Science Letters, 536, p.116140.	CALLEN\010827\IND	CALLEN\010827\IND-063	24.2079	67.7327							516.684				141.094								0.0791388	12.461		1.33025	0.321196	33.6944			44.5867					14.879					105.81	0	105.81	#DIV/0!	4.55584	0.681951
Europe	Portugal	Tagus River	Zhu et al., 2020, Earth and Planetary Science Letters, 536, p.116140.	ziyi zhu\180928\Tag2	ziyi zhu\180929\Tag2-069	38.9227	-8.99893							517.6				1157					2110				0.69		1.46	4.26	0.152			170					153.4					498	0	498	#DIV/0!	37.3587	25.7016
Europe	Hungary	Danube River	Zhu et al., 2020, Earth and Planetary Science Letters, 536, p.116140.	callen\060215\e2	callen\060215\e2-037	53.9222	8.72222							518.964				284.584					1360.26			0.0776233	11.0001			9.37463	1.38175			131.513					54.6092					284.298	0	284.298	#DIV/0!	9.18901	16.5729
Europe	Hungary	Danube River	Zhu et al., 2020, Earth and Planetary Science Letters, 536, p.116140.	callen\060215\e2	callen\060215\e2-094	53.9222	8.72222							520.377				297.438					1327.59				8.9002			7.40373	1.07335			120.586					56.9286					146.391	0	146.391	#DIV/0!	9.60407	16.1207
Europe	Italy	Po River	Zhu et al., 2020, Earth and Planetary Science Letters, 536, p.116140.	callen\041216\po	callen\041216\po-014	44.9525	12.4319							520.502				268.176					1069.75				8.6514		1.00791	2.29318	0.590117			84.3323					73.3975					234.51	0	234.51	#DIV/0!	8.6592	13.0594
Europe	Germany	Rhine River	Zhu et al., 2020, Earth and Planetary Science Letters, 536, p.116140.	callen\060609\e10	callen\060609\E10-117	53.9222	8.72222							521.496				186.124					491.212			0.0390687	9.44293			2.72088	0.142576			49.1114					21.1217					107.21	0	107.21	#DIV/0!	6.00982	6.03508
Europe	France	Rhone River	Zhu et al., 2020, Earth and Planetary Science Letters, 536, p.116140.	wang yan\061213\e12	wang yan\061213\e12-171	53.9222	8.72222							521.724				591.633					966.692				0.803263			2.23518	0.143219			86.0907					56.998					130.016	0	130.016	#DIV/0!	19.1034	11.751
Europe	Italy	Po River	Zhu et al., 2020, Earth and Planetary Science Letters, 536, p.116140.	wang yan\070105\po	wang yan\070105\po-151	44.9525	12.4319							521.98				819.609								0.091101	6.18356			10.0912	3.34303			223.738					121.724					767.849	0	767.849	#DIV/0!	26.4646	2.2063
Europe	Hungary	Danube River	Zhu et al., 2020, Earth and Planetary Science Letters, 536, p.116140.	callen\060215\e2	callen\060215\e2-140	53.9222	8.72222							523.118				1826.47					2935.56				0.539516			3.67919				226.641					139.501					249.908	0	249.908	#DIV/0!	58.9754	35.2411
Europe	Germany	Rhine River	Zhu et al., 2020, Earth and Planetary Science Letters, 536, p.116140.	callen\060609\e10	callen\060609\E10-169	53.9222	8.72222							523.37				277.562					514.695			0.0317902	3.84717			1.26978	0.330197			43.8669					37.3172					126.552	0	126.552	#DIV/0!	8.9623	6.31109
Europe	Poland	Oder River	Zhu et al., 2020, Earth and Planetary Science Letters, 536, p.116140.	CALLEN\060223\E3	CALLEN\060223\E3-018	53.9222	8.72222							523.425				1479.36					2986.9				1.10715			3.3487	0.102646			232.349					190.329					691.953	0	691.953	#DIV/0!	47.7676	36.1468
Europe	Portugal	Tagus River	Zhu et al., 2020, Earth and Planetary Science Letters, 536, p.116140.	ziyi zhu\180928\Tag2	ziyi zhu\180928\Tag2-032	38.9227	-8.99893							523.8				699					1280			0.779	7.77		5.24	5.01	0.77			111					91.2					576	0	576	#DIV/0!	22.5702	15.7382
Asia	India	Indus River	Zhu et al., 2020, Earth and Planetary Science Letters, 536, p.116140.	CALLEN\010827\IND	CALLEN\010827\IND-062	24.2079	67.7327							526.256				351.758									6.75139		0.635141	0.213508	47.5479			94.5853					45.9944					128.969	0	128.969	#DIV/0!	11.358	1.21172
Europe	Portugal	Tagus River	Zhu et al., 2020, Earth and Planetary Science Letters, 536, p.116140.	ziyi zhu\180928\Tag2	ziyi zhu\180928\Tag2-048	38.9227	-8.99893							528.4				404					684			0.025	0.805		0.59	1.12	0.109			53					58.9					357	0	357	#DIV/0!	13.0449	8.37494
Europe	Hungary	Danube River	Zhu et al., 2020, Earth and Planetary Science Letters, 536, p.116140.	callen\060215\e2	callen\060215\e2-087	53.9222	8.72222							528.729				394.585					1467.43				11.0173			3.64499	0.825879			111.061					96.0824					315.944	0	315.944	#DIV/0!	12.7409	17.8473
Europe	Hungary	Danube River	Zhu et al., 2020, Earth and Planetary Science Letters, 536, p.116140.	callen\060215\e2	callen\060215\e2-027	53.9222	8.72222							529.917				584.395					1174.33			0.210967	2.51467			1.63347	0.149303			73.7108					131.73					1244.74	0	1244.74	#DIV/0!	18.8697	14.4472
Europe	Portugal	Tagus River	Zhu et al., 2020, Earth and Planetary Science Letters, 536, p.116140.	ziyi zhu\180928\Tag2	ziyi zhu\180929\Tag2-059	38.9227	-8.99893							531.027				361					735			0.142	19.4		1.41	1.89	0.34			60.4					58.5					231	0	231	#DIV/0!	11.6564	9.13777
Europe	Poland	Vistula River	Zhu et al., 2020, Earth and Planetary Science Letters, 536, p.116140.	ziyi zhu\180501\Vis2	ziyi zhu\180501\Vis2-064	54.3587	18.9465							532.951				279					759			0.0128	13.41		1.03		0.543			57					66.2					142	0	142	#DIV/0!	9.00872	9.37326
Asia	India	Ganges	Zhu et al., 2020, Earth and Planetary Science Letters, 536, p.116140.	callen\030303\gan	callen\030303\gan32-m8	23.8544	89.4217							536.009				266.765									11.2475		0.350441	1.22883	0.406297			32.8882					51.196					313.164	0	313.164	#DIV/0!	8.61367	0.588492
Europe	Germany	Rhine River	Zhu et al., 2020, Earth and Planetary Science Letters, 536, p.116140.	callen\060609\e10	callen\060609\e10-109	53.9222	8.72222							536.821				732.26					1252.01			0.0314289	7.44059			2.87822	0.544764			113.351					63.6455					179.326	0	179.326	#DIV/0!	23.6442	15.2206
Europe	Italy	Po River	Zhu et al., 2020, Earth and Planetary Science Letters, 536, p.116140.	callen\041216\po	callen\041216\po-062	44.9525	12.4319							538.19				477.11					1223.82			0.0865708	19.5603		6.25201	11.9349	1.69268			139.092					61.1318					317.178	0	317.178	#DIV/0!	15.4056	15.2456
Europe	Portugal	Tagus River	Zhu et al., 2020, Earth and Planetary Science Letters, 536, p.116140.	ziyi zhu\180928\Tag2	ziyi zhu\180929\Tag2-089	38.9227	-8.99893							540				311					1407			0.0173	10.59		1.14	2.69	0.908			100.5					113.9					375	0	375	#DIV/0!	10.042	17.2036
Europe	Portugal	Tagus River	Zhu et al., 2020, Earth and Planetary Science Letters, 536, p.116140.	ziyi zhu\180928\Tag2	ziyi zhu\180928\Tag2-018	38.9227	-8.99893							540.272				405					1213			0.095	14.15		1.74	2.63	0.341			94.8					92.83					558.6	0	558.6	#DIV/0!	13.0772	14.8919
Europe	Italy	Po River	Zhu et al., 2020, Earth and Planetary Science Letters, 536, p.116140.	callen\041216\po	callen\041216\po-071	44.9525	12.4319							541.162				239.334					630.698			0.056531	4.12414		0.626121	1.63519	0.2084			50.6506					49.1994					196.68	0	196.68	#DIV/0!	7.72792	7.73373
Europe	Hungary	Danube River	Zhu et al., 2020, Earth and Planetary Science Letters, 536, p.116140.	wang yan\070110\e2	wang yan\070110\E2-45	53.9222	8.72222							541.418				134.213					1053.02			0.0779723	43.0262			6.06286	1.71775			92.8426					63.0212					246.934	0	246.934	#DIV/0!	4.33365	13.1358
Europe	Germany	Rhine River	Zhu et al., 2020, Earth and Planetary Science Letters, 536, p.116140.	callen\060609\e10	callen\060609\E10-121	53.9222	8.72222							541.458				875.633								0.0511445	1.08081			3.70312	0.141596			102.904					61.8304					178.07	0	178.07	#DIV/0!	28.2736	1.02021
Europe	Portugal	Tagus River	Zhu et al., 2020, Earth and Planetary Science Letters, 536, p.116140.	ziyi zhu\180928\Tag2	ziyi zhu\180928\Tag2-024	38.9227	-8.99893							542.7				689					1149			0.065	0.95		0.6	1.78	0.195			97.6					58.6					251.5	0	251.5	#DIV/0!	22.2473	13.8846
Europe	Italy	Po River	Zhu et al., 2020, Earth and Planetary Science Letters, 536, p.116140.	callen\041216\po	callen\041216\po-060	44.9525	12.4319							542.75				190.637					793.805			0.0644747	7.70411		2.07152	3.80812	0.822772			73.6239					42.238					145.285	0	145.285	#DIV/0!	6.15555	9.72417
Europe	France	Rhone River	Zhu et al., 2020, Earth and Planetary Science Letters, 536, p.116140.	wang yan\061213\e12	wang yan\061213\e12-194	53.9222	8.72222							543.962				130.956					338.278				5.95069			1.56943	0.431109			32.0013					19.9565					61.556	0	61.556	#DIV/0!	4.22849	4.17187
Europe	Germany	Rhine River	Zhu et al., 2020, Earth and Planetary Science Letters, 536, p.116140.	callen\060609\e10	callen\060609\e10-065	53.9222	8.72222							543.992				346.416					2144.62			0.0432885	12.9883			8.28198	2.30106			183.114					112.079					164.556	0	164.556	#DIV/0!	11.1855	26.0544
Europe	Germany	Rhine River	Zhu et al., 2020, Earth and Planetary Science Letters, 536, p.116140.	callen\060609\e10	callen\060609\e10-007	53.9222	8.72222							544.935				361.499					416.679			0.046439	3.33637			15.896	0.105506			69.3736					2.95463					399.292	0	399.292	#DIV/0!	11.6725	5.26138
Europe	France	Rhone River	Zhu et al., 2020, Earth and Planetary Science Letters, 536, p.116140.	wang yan\061213\e12	wang yan\061213\e12-185	53.9222	8.72222							545.108				183.375					631.096			0.0645449	14.0983			2.58512	0.325178			55.8056					39.3284					188.092	0	188.092	#DIV/0!	5.92106	7.78752
Europe	France	Rhone River	Zhu et al., 2020, Earth and Planetary Science Letters, 536, p.116140.	wang yan\061213\e12	wang yan\061213\e12-113	53.9222	8.72222							545.357				1383.99					2450.01				0.952728			5.56606				213.046					137.471					282.245	0	282.245	#DIV/0!	44.6882	29.6996
Europe	Portugal	Tagus River	Zhu et al., 2020, Earth and Planetary Science Letters, 536, p.116140.	ziyi zhu\180928\Tag2	ziyi zhu\180928\Tag2-033	38.9227	-8.99893							545.7				233					470			0.066	22.3		1.93	2.66	1.11			37.9					38.7					160.1	0	160.1	#DIV/0!	7.52341	5.93923
Europe	Germany	Elbe River	Zhu et al., 2020, Earth and Planetary Science Letters, 536, p.116140.	ziyi zhu\180430\Elbe	ziyi zhu\180430\Elbe-116	53.831	8.82492							546.092				1150					2145			0.0235	1.36		2.05		0.184			190.6					113.4					191.4	0	191.4	#DIV/0!	37.1327	25.9745
Europe	Germany	Rhine River	Zhu et al., 2020, Earth and Planetary Science Letters, 536, p.116140.	callen\060609\e10	callen\060609\E10-166	53.9222	8.72222							546.162				124.932					315.873			0.0386628	6.51533			8.02896	0.122461			48.832					1.97842					182.247	0	182.247	#DIV/0!	4.03398	3.96591
Europe	France	Rhone River	Zhu et al., 2020, Earth and Planetary Science Letters, 536, p.116140.	wang yan\061213\e12	wang yan\061213\E12-044	53.9222	8.72222							548.08				359.124					1109.87				22.7508			5.66962	1.24152			101.377					66.315					457.566	0	457.566	#DIV/0!	11.5959	13.6955
Europe	France	Rhone River	Zhu et al., 2020, Earth and Planetary Science Letters, 536, p.116140.	wang yan\061213\e12	wang yan\061213\e12-184	53.9222	8.72222							548.095				327.629					1708.13				15.2802			4.60638	0.758372			151.912					90.4311					268.204	0	268.204	#DIV/0!	10.5789	20.8103
Europe	France	Rhone River	Zhu et al., 2020, Earth and Planetary Science Letters, 536, p.116140.	wang yan\061213\e12	wang yan\061213\e12-073	53.9222	8.72222							548.527				1958.56					3790.08			0.570639	2.94524			7.23281	0.591785			339.847					98.6396					489.694	0	489.694	#DIV/0!	63.2406	45.3652
Asia	India	Indus River	Zhu et al., 2020, Earth and Planetary Science Letters, 536, p.116140.	CALLEN\010827\IND	CALLEN\010827\IND-121	24.2079	67.7327							548.736				495.774								0.103708	18.1171		8.81807	1.8697	198.88			259.339					77.0362					838.245	0	838.245	#DIV/0!	16.0082	3.54821
Europe	Germany	Elbe River	Zhu et al., 2020, Earth and Planetary Science Letters, 536, p.116140.	ziyi zhu\180430\Elbe	ziyi zhu\180430\Elbe-048	53.831	8.82492							550.1				143					400				3.06		0.543		0.403			28.8					40.69					140.4	0	140.4	#DIV/0!	4.61737	4.93744
Europe	Hungary	Danube River	Zhu et al., 2020, Earth and Planetary Science Letters, 536, p.116140.	callen\060215\e2	callen\060215\e2-040	53.9222	8.72222							550.342				805.29					719.374			0.663688	8.94708			1.74216	0.229427			55.1766					71.0034					241.666	0	241.666	#DIV/0!	26.0023	8.91897
Europe	France	Rhone River	Zhu et al., 2020, Earth and Planetary Science Letters, 536, p.116140.	wang yan\061213\e12	wang yan\061213\e12-034	53.9222	8.72222							551.479				1362.13					2743.05				0.695007			5.88708	0.161445			226.529					129.698					279.18	0	279.18	#DIV/0!	43.9824	33.0358
Europe	France	Rhone River	Zhu et al., 2020, Earth and Planetary Science Letters, 536, p.116140.	wang yan\061213\e12	wang yan\061213\e12-120	53.9222	8.72222							552.521				1789.85					3554.52				0.520841			5.42178	0.15167			298.404					179.12					149.252	0	149.252	#DIV/0!	57.7929	42.884
Europe	Portugal	Tagus River	Zhu et al., 2020, Earth and Planetary Science Letters, 536, p.116140.	ziyi zhu\180928\Tag2	ziyi zhu\180929\Tag2-057	38.9227	-8.99893							552.7				246					1940			0.107	20		5.36	10.3	0.84			190					85.7					261	0	261	#DIV/0!	7.94317	23.7359
Europe	Portugal	Tagus River	Zhu et al., 2020, Earth and Planetary Science Letters, 536, p.116140.	ziyi zhu\180501\Tag1	ziyi zhu\180501\Tag1-016	38.9227	-8.99893							553.9				479					1244			0.112	9.9		5.01		0.84			123.1					71.7					374.9	0	374.9	#DIV/0!	15.4666	15.2722
Europe	Hungary	Danube River	Zhu et al., 2020, Earth and Planetary Science Letters, 536, p.116140.	wang yan\070110\e2	wang yan\070110\E2-21	53.9222	8.72222							554.251				510.125					994.404			0.135662	2.45673			4.4156	0.757656			97.346					51.7864					59.9785	0	59.9785	#DIV/0!	16.4716	12.1335
Europe	Italy	Po River	Zhu et al., 2020, Earth and Planetary Science Letters, 536, p.116140.	wang yan\070105\po	wang yan\070105\po-208	44.9525	12.4319							555.74				202.287									8.47678			2.22425	0.55188			54.2618					38.2531					130.089	0	130.089	#DIV/0!	6.53171	0.631433
Europe	Germany	Rhine River	Zhu et al., 2020, Earth and Planetary Science Letters, 536, p.116140.	callen\060609\e10	callen\060609\e10-013	53.9222	8.72222							555.979				80.5998					66.6028				6.07183			0.891507	0.357516			8.96105					2.08374					309.967	0	309.967	#DIV/0!	2.60251	0.867859
Europe	Germany	Rhine River	Zhu et al., 2020, Earth and Planetary Science Letters, 536, p.116140.	callen\060609\e10	callen\060609\E10-124	53.9222	8.72222							556.152				1171.76					1882.26			0.0497229	1.05308			2.88449	0.246126			161.918					100.937					311.188	0	311.188	#DIV/0!	37.8352	22.7746
Europe	France	Rhone River	Zhu et al., 2020, Earth and Planetary Science Letters, 536, p.116140.	wang yan\061213\e12	wang yan\061213\e12-181	53.9222	8.72222							556.605				349.96					972.463				8.58192			4.70116	0.265596			106.639					42.4742					1806.06	0	1806.06	#DIV/0!	11.3	11.932
Europe	Portugal	Tagus River	Zhu et al., 2020, Earth and Planetary Science Letters, 536, p.116140.	ziyi zhu\180928\Tag2	ziyi zhu\180928\Tag2-013	38.9227	-8.99893							557.42				387					812			0.074	2.31		0.93	2.06	0.36			65.7					51.3					359	0	359	#DIV/0!	12.496	9.87084
Europe	Italy	Po River	Zhu et al., 2020, Earth and Planetary Science Letters, 536, p.116140.	callen\041216\po	callen\041216\po-010	44.9525	12.4319							560.224				256.505					779.001				51.8919		2.42985	4.40118	1.23185			77.2483					43.7122					106.535	0	106.535	#DIV/0!	8.28236	9.91244
Europe	Hungary	Danube River	Zhu et al., 2020, Earth and Planetary Science Letters, 536, p.116140.	callen\060215\e2	callen\060215\e2-101	53.9222	8.72222							560.392				1033.52					2237.02			0.0540969	5.29128			5.83669	0.360211			192.172					132.292					261.624	0	261.624	#DIV/0!	33.3718	27.1812
Europe	France	Rhone River	Zhu et al., 2020, Earth and Planetary Science Letters, 536, p.116140.	wang yan\061213\e12	wang yan\061213\e12-015	53.9222	8.72222							563.309				1787.47					3720.27				0.482389			5.29296	0.1793			308.427					179.327					229.506	0	229.506	#DIV/0!	57.7163	44.8104
Europe	Hungary	Danube River	Zhu et al., 2020, Earth and Planetary Science Letters, 536, p.116140.	callen\060215\e2	callen\060215\e2-081	53.9222	8.72222							563.411				285.744					699.337				15.6156			3.61875	1.30647			62.9704					42.1684					112.25	0	112.25	#DIV/0!	9.22646	8.63915
Europe	Portugal	Tagus River	Zhu et al., 2020, Earth and Planetary Science Letters, 536, p.116140.	ziyi zhu\180928\Tag2	ziyi zhu\180929\Tag2-091	38.9227	-8.99893							563.7				693					1250			0.49	25.47		4.75	6.93	1.31			115.6					72.4					365.7	0	365.7	#DIV/0!	22.3765	15.4588
Europe	Germany	Elbe River	Zhu et al., 2020, Earth and Planetary Science Letters, 536, p.116140.	ziyi zhu\180430\Elbe	ziyi zhu\180430\Elbe-091	53.831	8.82492							563.924				1146					2030			0.0198	0.489		0.8		0.072			160.1					124.3					208	0	208	#DIV/0!	37.0036	24.5398
Europe	France	Rhone River	Zhu et al., 2020, Earth and Planetary Science Letters, 536, p.116140.	wang yan\061213\e12	wang yan\061213\E12-050	53.9222	8.72222							564.023				472.552					1113.66				68.6272			7.77751	1.72751			115.185					59.3805					260.461	0	260.461	#DIV/0!	15.2584	14.1282
Europe	France	Rhone River	Zhu et al., 2020, Earth and Planetary Science Letters, 536, p.116140.	wang yan\061213\e12	wang yan\061213\e12-146	53.9222	8.72222							564.161				257.507					1071.33				12.4054			5.60645	0.997301			99.1397					55.0689					106.584	0	106.584	#DIV/0!	8.31474	13.1081
Europe	Germany	Elbe River	Zhu et al., 2020, Earth and Planetary Science Letters, 536, p.116140.	ziyi zhu\180430\Elbe	ziyi zhu\180430\Elbe-079	53.831	8.82492							565				313					1369			0.57	13.8		4.3		0.317			131.4					72.8					457	0	457	#DIV/0!	10.1066	16.7585
Europe	France	Rhone River	Zhu et al., 2020, Earth and Planetary Science Letters, 536, p.116140.	wang yan\061213\e12	wang yan\061213\e12-055	53.9222	8.72222							565.288				183.121					995.221				10.7767			3.31837	0.644439			89.9645					48.4476					173.124	0	173.124	#DIV/0!	5.91285	12.1285
Asia	India	Indus River	Zhu et al., 2020, Earth and Planetary Science Letters, 536, p.116140.	CALLEN\010827\IND	CALLEN\010827\IND-048	24.2079	67.7327							565.297				201.853								0.0784194	17.245		0.631137	0.286137	31.803			64.3633					35.4674					78.3262	0	78.3262	#DIV/0!	6.5177	0.937918
Europe	France	Rhone River	Zhu et al., 2020, Earth and Planetary Science Letters, 536, p.116140.	wang yan\061213\e12	wang yan\061213\e12-016	53.9222	8.72222							565.323				1245.08					2418.59				0.550041			3.99348	0.154439			211.303					118.31					162.573	0	162.573	#DIV/0!	40.2028	29.2136
Europe	Italy	Po River	Zhu et al., 2020, Earth and Planetary Science Letters, 536, p.116140.	callen\041216\po	callen\041216\po-122	44.9525	12.4319							565.426				59.0325					151.603				5.26101		0.378653	0.518518	0.204535			10.4298					13.1327					232.018	0	232.018	#DIV/0!	1.90612	1.88952
Europe	Germany	Rhine River	Zhu et al., 2020, Earth and Planetary Science Letters, 536, p.116140.	callen\060609\e10	callen\060609\e10-036	53.9222	8.72222							565.734				169.727					70.2309			0.0408387	2.07857			5.00957	0.193113			12.074					0.866146					428.495	0	428.495	#DIV/0!	5.48036	0.918959
Europe	France	Rhone River	Zhu et al., 2020, Earth and Planetary Science Letters, 536, p.116140.	wang yan\061213\e12	wang yan\061213\e12-187	53.9222	8.72222							566.369				1582.59					2823.46			0.120051	0.809887			9.89957	0.200024			267.172					132.352					176.914	0	176.914	#DIV/0!	51.1008	34.2341
Europe	Poland	Vistula River	Zhu et al., 2020, Earth and Planetary Science Letters, 536, p.116140.	ziyi zhu\180501\Vis2	ziyi zhu\180501\Vis2-080	54.3587	18.9465							566.7				1681					3312			0.106	1.28		1.36		0.41			261.1					212.7					600	0	600	#DIV/0!	54.2783	40.0996
Europe	Hungary	Danube River	Zhu et al., 2020, Earth and Planetary Science Letters, 536, p.116140.	callen\060215\e2	callen\060215\e2-098	53.9222	8.72222							566.968				325.748					1309.99				31.4443			3.37243	0.787046			107.171					80.5408					687.091	0	687.091	#DIV/0!	10.5182	16.1074
Europe	Poland	Oder River	Zhu et al., 2020, Earth and Planetary Science Letters, 536, p.116140.	CALLEN\060223\E3	CALLEN\060223\E3-174	53.9222	8.72222							567.371				183.778					731.646				14.6033			2.88185	0.26621			65.8538					43.0315					277.818	0	277.818	#DIV/0!	5.93405	9.00629
Europe	Germany	Rhine River	Zhu et al., 2020, Earth and Planetary Science Letters, 536, p.116140.	callen\060609\e10	callen\060609\E10-187	53.9222	8.72222							567.572				53.703					38.3425				2.19926			0.643653	0.492896			5.2237					0.447064					39.224	0	39.224	#DIV/0!	1.73403	0.48922
Europe	Poland	Vistula River	Zhu et al., 2020, Earth and Planetary Science Letters, 536, p.116140.	ziyi zhu\180501\Vis1	ziyi zhu\180501\Vis1-098	54.3587	18.9465							568				1087					1720			0.0232	3.16		1.63		0.231			148					104					309	0	309	#DIV/0!	35.0985	20.8882
Europe	Hungary	Danube River	Zhu et al., 2020, Earth and Planetary Science Letters, 536, p.116140.	callen\060215\e2	callen\060215\e2-139	53.9222	8.72222							570.017				247.385					739.336				44.9955			4.12943	0.788467			73.3497					34.5849					147.163	0	147.163	#DIV/0!	7.98789	9.31932
Europe	Poland	Vistula River	Zhu et al., 2020, Earth and Planetary Science Letters, 536, p.116140.	ziyi zhu\180501\Vis2	ziyi zhu\180501\Vis2-101	54.3587	18.9465							571.4				356					1943			0.072	11.38		5.75		1.08			191					101.6					450	0	450	#DIV/0!	11.495	23.7407
Asia	India	Ganges River	Zhu et al., 2020, Earth and Planetary Science Letters, 536, p.116140.	CALLEN\011025\GR8	CALLEN\011025\GR8-064	23.8544	89.4217							571.426				165.49									6.37397		0.897038	1.33343	0.260359			31.2289					31.5495					369.2	0	369.2	#DIV/0!	5.34356	0.434756
Europe	Portugal	Tagus River	Zhu et al., 2020, Earth and Planetary Science Letters, 536, p.116140.	ziyi zhu\180928\Tag2	ziyi zhu\180929\Tag2-055	38.9227	-8.99893							571.524				430					478			0.516	7.97		3.96	3.36	0.8			44.6					33.59					240	0	240	#DIV/0!	13.8844	5.9589
Europe	France	Rhone River	Zhu et al., 2020, Earth and Planetary Science Letters, 536, p.116140.	wang yan\061213\e12	wang yan\061213\e12-089	53.9222	8.72222							574.671				426.29					1506.33				6.20573			6.8575	0.326111			149.64					63.1856					409.784	0	409.784	#DIV/0!	13.7646	18.318
Europe	Poland	Vistula River	Zhu et al., 2020, Earth and Planetary Science Letters, 536, p.116140.	ziyi zhu\180501\Vis1	ziyi zhu\180501\Vis1-088	54.3587	18.9465							575.1				324					642			0.42	6.34		1.41		0.572			54.1					43.29					159.7	0	159.7	#DIV/0!	10.4617	7.86371
Asia	India	Ganges River	Zhu et al., 2020, Earth and Planetary Science Letters, 536, p.116140.	CALLEN\011025\GR8	CALLEN\011025\GR8-041	23.8544	89.4217							576.043				230.335									5.61482		1.0718	1.56562	0.244186			45.0212					30.3285					171.034	0	171.034	#DIV/0!	7.43735	0.509885
Europe	Poland	Oder River	Zhu et al., 2020, Earth and Planetary Science Letters, 536, p.116140.	CALLEN\060223\E3	CALLEN\060223\E3-047	53.9222	8.72222							576.634				268.157					1250.12			0.213546	8.56547			5.63984	1.0531			113.828					57.6199					107.311	0	107.311	#DIV/0!	8.65861	15.1989
Europe	France	Rhone River	Zhu et al., 2020, Earth and Planetary Science Letters, 536, p.116140.	wang yan\061213\e12	wang yan\061213\e12-100	53.9222	8.72222							577.165				259.349					1089.83			0.152843	8.94583			4.57784	0.350307			99.9034					49.4296					311.671	0	311.671	#DIV/0!	8.3742	13.254
Europe	Poland	Oder River	Zhu et al., 2020, Earth and Planetary Science Letters, 536, p.116140.	CALLEN\060223\E3	CALLEN\060223\E3-025	53.9222	8.72222							579.961				251.833					1008.63				10.327			4.95513	0.235385			95.7139					50.1253					185.352	0	185.352	#DIV/0!	8.1315	12.3293
Europe	Italy	Po River	Zhu et al., 2020, Earth and Planetary Science Letters, 536, p.116140.	callen\041216\po	callen\041216\po-098	44.9525	12.4319							580.527				241.713					1355.12			0.178971	43.1869		12.9168	16.7779	6.20918			159.538					48.471					252.531	0	252.531	#DIV/0!	7.80474	17.0535
Europe	Italy	Po River	Zhu et al., 2020, Earth and Planetary Science Letters, 536, p.116140.	callen\041216\po	callen\041216\po-135	44.9525	12.4319							581.89				173.015					327.326				14.0241		0.59028	0.921984	0.165326			27.3085					26.3405					110.442	0	110.442	#DIV/0!	5.58654	4.11194
Europe	Italy	Po River	Zhu et al., 2020, Earth and Planetary Science Letters, 536, p.116140.	callen\041216\po	callen\041216\po-030	44.9525	12.4319							583.715				186.329					402.714				21.9007		1.71693	3.13548	0.702879			42.73					18.9541					112.885	0	112.885	#DIV/0!	6.01644	5.09493
Europe	Portugal	Tagus River	Zhu et al., 2020, Earth and Planetary Science Letters, 536, p.116140.	ziyi zhu\180928\Tag2	ziyi zhu\180929\Tag2-075	38.9227	-8.99893							584.626				152.7					858			0.0195	4.35		3.58	6.01	0.948			90.8					36.9					136.3	0	136.3	#DIV/0!	4.93058	10.5231
Europe	Poland	Vistula River	Zhu et al., 2020, Earth and Planetary Science Letters, 536, p.116140.	ziyi zhu\180501\Vis1	ziyi zhu\180501\Vis1-086	54.3587	18.9465							587.337				266.8					819			0.0091	3.71		3.24		0.82			86.7					35.5					204.5	0	204.5	#DIV/0!	8.61479	10.0034
Europe	Portugal	Tagus River	Zhu et al., 2020, Earth and Planetary Science Letters, 536, p.116140.	ziyi zhu\180501\Tag1	ziyi zhu\180501\Tag1-019	38.9227	-8.99893							587.496				467					720				0.594		0.337		0.045			59.9					43.63					161.1	0	161.1	#DIV/0!	15.0791	8.72379
Europe	Italy	Po River	Zhu et al., 2020, Earth and Planetary Science Letters, 536, p.116140.	callen\041216\po	callen\041216\po-044	44.9525	12.4319							587.958				265.435					1549.49				61.1785		9.41255	14.345	3.74545			173.712					64.1985					263.399	0	263.399	#DIV/0!	8.5707	19.4874
Europe	France	Rhone River	Zhu et al., 2020, Earth and Planetary Science Letters, 536, p.116140.	wang yan\061213\e12	wang yan\061213\e12-076	53.9222	8.72222							589.696				98.5923					1139.09				52.5491			14.3694	5.40065			132.982					40.0607					243.773	0	243.773	#DIV/0!	3.18348	14.3665
Europe	Italy	Po River	Zhu et al., 2020, Earth and Planetary Science Letters, 536, p.116140.	callen\041216\po	callen\041216\po-059	44.9525	12.4319							591.497				103.111					296.419				10.3515		1.03268	2.10897	0.214068			29.6406					11.9249					234.652	0	234.652	#DIV/0!	3.32937	3.68132
Europe	Portugal	Tagus River	Zhu et al., 2020, Earth and Planetary Science Letters, 536, p.116140.	ziyi zhu\180928\Tag2	ziyi zhu\180928\Tag2-001	38.9227	-8.99893							593.6				820					1980			0.042	4.14		2.4	5.97	0.185			169					107.9					308	0	308	#DIV/0!	26.4772	24.0162
Europe	France	Rhone River	Zhu et al., 2020, Earth and Planetary Science Letters, 536, p.116140.	wang yan\061213\e12	wang yan\061213\e12-190	53.9222	8.72222							593.852				241.295					1392.6				19.5			9.0185	0.209084			147.378					60.8066					277.05	0	277.05	#DIV/0!	7.79124	17.1197
Europe	Hungary	Danube River	Zhu et al., 2020, Earth and Planetary Science Letters, 536, p.116140.	wang yan\070110\e2	wang yan\070110\E2-47	53.9222	8.72222							594.447				332.768					967.632			0.133106	39.9831			11.228	4.6653			112.914					38.5304					173.918	0	173.918	#DIV/0!	10.7448	12.1912
Europe	Hungary	Danube River	Zhu et al., 2020, Earth and Planetary Science Letters, 536, p.116140.	wang yan\070110\e2	wang yan\070110\E2-36	53.9222	8.72222							595.138				216.552					715.065				36.7267			2.18841	0.629595			60.716					45.9387					186.109	0	186.109	#DIV/0!	6.99232	8.96046
Europe	Portugal	Tagus River	Zhu et al., 2020, Earth and Planetary Science Letters, 536, p.116140.	ziyi zhu\180928\Tag2	ziyi zhu\180929\Tag2-095	38.9227	-8.99893							595.784				630					1039			0.64	36.4		5.66	7.44	1.44			93.4					60.3					214.8	0	214.8	#DIV/0!	20.3423	12.9692
Europe	France	Rhone River	Zhu et al., 2020, Earth and Planetary Science Letters, 536, p.116140.	wang yan\061213\e12	wang yan\061213\e12-019	53.9222	8.72222							597.14				257.358					1237.65				35.381			6.23811	1.51415			112.275					80.5273					304.928	0	304.928	#DIV/0!	8.3099	15.3768
Asia	India	Ganges	Zhu et al., 2020, Earth and Planetary Science Letters, 536, p.116140.	callen\030303\gan	callen\030303\gan18-k7	23.8544	89.4217							598.3				159.129									4.31643		1.47437	3.1728	0.627295			58.7135					26.722					71.8571	0	71.8571	#DIV/0!	5.13815	0.580268
Europe	Poland	Vistula River	Zhu et al., 2020, Earth and Planetary Science Letters, 536, p.116140.	ziyi zhu\180501\Vis1	ziyi zhu\180501\Vis1-007	54.3587	18.9465							600.722				325					1185			0.078	10.36		4.11		1.13			115.1					56.6					68.3	0	68.3	#DIV/0!	10.494	14.4718
Europe	Portugal	Tagus River	Zhu et al., 2020, Earth and Planetary Science Letters, 536, p.116140.	ziyi zhu\180928\Tag2	ziyi zhu\180928\Tag2-022	38.9227	-8.99893							601.4				146					599			0.191	35.95		4.04	5.5	0.886			59					29.8					235	0	235	#DIV/0!	4.71424	7.59966
Europe	Italy	Po River	Zhu et al., 2020, Earth and Planetary Science Letters, 536, p.116140.	callen\041216\po	callen\041216\po-034	44.9525	12.4319							601.807				756.418					1487.43			0.120344	13.012		2.39875	5.09646	0.818368			131.468					85.3197					434.298	0	434.298	#DIV/0!	24.4242	18.1777
Europe	Hungary	Danube River	Zhu et al., 2020, Earth and Planetary Science Letters, 536, p.116140.	callen\060215\e2	callen\060215\e2-068	53.9222	8.72222							602.356				414.241					1144.8				19.0867			7.00705	2.60387			113.419					68.3526					128.982	0	128.982	#DIV/0!	13.3756	14.1659
Europe	Portugal	Tagus River	Zhu et al., 2020, Earth and Planetary Science Letters, 536, p.116140.	ziyi zhu\180928\Tag2	ziyi zhu\180928\Tag2-044	38.9227	-8.99893							602.5				410					945			0.075	3.02		0.69	2.36	0.127			79.9					56.7					225.5	0	225.5	#DIV/0!	13.2386	11.489
Europe	Germany	Elbe River	Zhu et al., 2020, Earth and Planetary Science Letters, 536, p.116140.	ziyi zhu\180430\Elbe	ziyi zhu\180430\Elbe-121	53.831	8.82492							603.2				199.9					1710			0.088	80.3		16.44		3.15			216.4					60.4					96.6	0	96.6	#DIV/0!	6.45463	21.6205
Europe	Hungary	Danube River	Zhu et al., 2020, Earth and Planetary Science Letters, 536, p.116140.	callen\060215\e2	callen\060215\e2-046	53.9222	8.72222							604.682				120.228					386.229				50.8077			2.29134	0.696927			33.6992					29.2731					757.087	0	757.087	#DIV/0!	3.88207	5.10166
Europe	Germany	Rhine River	Zhu et al., 2020, Earth and Planetary Science Letters, 536, p.116140.	callen\060609\e10	callen\060609\E10-178	53.9222	8.72222							604.863				345.51					622.648			0.0653235	16.7207			6.70839	1.20658			67.7261					27.6882					326.78	0	326.78	#DIV/0!	11.1563	7.75127
Europe	Germany	Rhine River	Zhu et al., 2020, Earth and Planetary Science Letters, 536, p.116140.	callen\060609\e10	callen\060609\E10-134	53.9222	8.72222							604.989				584.43					1123.82			0.0358894	5.80237			4.22938	0.252822			103.892					49.5336					261.766	0	261.766	#DIV/0!	18.8708	13.6353
Europe	Poland	Vistula River	Zhu et al., 2020, Earth and Planetary Science Letters, 536, p.116140.	ziyi zhu\180501\Vis1	ziyi zhu\180501\Vis1-067	54.3587	18.9465							605.012				245.2					581.2			0.0045	2.312		0.59		0.181			53					32.55					85.6	0	85.6	#DIV/0!	7.91734	7.07165
Europe	France	Rhone River	Zhu et al., 2020, Earth and Planetary Science Letters, 536, p.116140.	wang yan\061213\e12	wang yan\061213\e12-071	53.9222	8.72222							605.218				189.041					450.033				9.73061			0.931769	0.156125			32.6388					37.6708					125.422	0	125.422	#DIV/0!	6.10402	5.55503
Europe	Hungary	Danube River	Zhu et al., 2020, Earth and Planetary Science Letters, 536, p.116140.	callen\060215\e2	callen\060215\e2-107	53.9222	8.72222							605.304				340.784					1012.85				59.6283			7.20153	1.32273			103.331					45.3604					99.9354	0	99.9354	#DIV/0!	11.0037	12.7704
Europe	Italy	Po River	Zhu et al., 2020, Earth and Planetary Science Letters, 536, p.116140.	wang yan\070105\po	wang yan\070105\po-193	44.9525	12.4319							605.361				244.215								0.0456606	18.94			4.82867	1.48919			67.1967					33.5774					38.3539	0	38.3539	#DIV/0!	7.88555	0.782809
Europe	Germany	Fehrman Island	Zhu et al., 2020, Earth and Planetary Science Letters, 536, p.116140.	callen\051012\e5	callen\051012\e5-116	53.9222	8.72222							607.473				109.038					431.727				5.18753			1.565	0.128933			40.8966					21.46					56.4838	0	56.4838	#DIV/0!	3.52075	5.2789
Europe	France	Rhone River	Zhu et al., 2020, Earth and Planetary Science Letters, 536, p.116140.	wang yan\061213\e12	wang yan\061213\e12-133	53.9222	8.72222							607.845				337.622					1618.17			0.513487	90.4364			7.77066	2.31953			155.393					82.0823					527.736	0	527.736	#DIV/0!	10.9016	20.3436
Europe	France	Rhone River	Zhu et al., 2020, Earth and Planetary Science Letters, 536, p.116140.	wang yan\061213\e12	wang yan\061213\e12-192	53.9222	8.72222							609.463				154.589					389.984				7.37186			1.0759	0.357807			28.0237					39.0965					150.302	0	150.302	#DIV/0!	4.99156	4.84476
Europe	Germany	Fehrman Island	Zhu et al., 2020, Earth and Planetary Science Letters, 536, p.116140.	callen\051012\e5	callen\051012\e5-040	53.9222	8.72222							610.494				158.434					304.095				2.47518			0.806096	0.308715			23.1488					25.9299					40.8322	0	40.8322	#DIV/0!	5.11571	3.73632
Europe	Hungary	Danube River	Zhu et al., 2020, Earth and Planetary Science Letters, 536, p.116140.	callen\060215\e2	callen\060215\e2-132	53.9222	8.72222							611.103				233.726					1303.42			0.434032	46.2719			3.19777	0.818753			97.9835					99.0795					695.361	0	695.361	#DIV/0!	7.54686	16.1909
Europe	Germany	Rhine River	Zhu et al., 2020, Earth and Planetary Science Letters, 536, p.116140.	callen\060609\e10	callen\060609\E10-190	53.9222	8.72222							611.151				130.907					239.266			0.0359411	8.82609			2.28677	0.676896			26.129					10.4795					56.0375	0	56.0375	#DIV/0!	4.22691	2.995
Europe	Poland	Oder River	Zhu et al., 2020, Earth and Planetary Science Letters, 536, p.116140.	CALLEN\060223\E3	CALLEN\060223\E3-010	53.9222	8.72222							611.237				197.141					401.858				10.93			2.20069	0.453286			37.1774					22.002					193.219	0	193.219	#DIV/0!	6.36555	4.97047
Asia	India	Ganges	Zhu et al., 2020, Earth and Planetary Science Letters, 536, p.116140.	callen\030820\gr8	callen\030820\gr8-28	23.8544	89.4217							612.114				213.934								0.347261	14.3077		1.40051	1.84487	0.427181			46.0132					64.4737					359.164	0	359.164	#DIV/0!	6.90777	0.780994
Europe	Poland	Vistula River	Zhu et al., 2020, Earth and Planetary Science Letters, 536, p.116140.	ziyi zhu\180501\Vis1	ziyi zhu\180501\Vis1-011	54.3587	18.9465							613.059				921					1469				1.329		2.02		0.181			130.4					86.8					148.8	0	148.8	#DIV/0!	29.7385	17.8473
Europe	Poland	Oder River	Zhu et al., 2020, Earth and Planetary Science Letters, 536, p.116140.	CALLEN\060223\E3	CALLEN\060223\E3-067	53.9222	8.72222							613.254				373.489					828.238				7.5103			3.44728	1.30452			78.4651					49.2122					40.8545	0	40.8545	#DIV/0!	12.0597	10.1657
Europe	Hungary	Danube River	Zhu et al., 2020, Earth and Planetary Science Letters, 536, p.116140.	wang yan\070110\e2	wang yan\070110\E2-32	53.9222	8.72222							613.534				78.673					586.517				29.9628			2.67645	1.10781			45.4779					51.244					298.494	0	298.494	#DIV/0!	2.5403	7.40913
Europe	Italy	Po River	Zhu et al., 2020, Earth and Planetary Science Letters, 536, p.116140.	callen\041216\po	callen\041216\po-019	44.9525	12.4319							613.643				284.419					831.619				14.1584		1.28402	2.79302	0.506852			72.6107					50.048					132.264	0	132.264	#DIV/0!	9.18368	10.2192
Europe	Hungary	Danube River	Zhu et al., 2020, Earth and Planetary Science Letters, 536, p.116140.	callen\060215\e2	callen\060215\e2-137	53.9222	8.72222							613.679				583.272					2235.19				21.9467			7.04521	2.90217			211.669					111.762					584.414	0	584.414	#DIV/0!	18.8335	27.3066
Europe	Germany	Rhine River	Zhu et al., 2020, Earth and Planetary Science Letters, 536, p.116140.	callen\060609\e10	callen\060609\e10-110	53.9222	8.72222							614.401				215.878					602.583			0.0513672	14.0526			3.37678	0.365112			54.5406					32.7186					364.555	0	364.555	#DIV/0!	6.97054	7.42634
Europe	Hungary	Danube River	Zhu et al., 2020, Earth and Planetary Science Letters, 536, p.116140.	callen\060215\e2	callen\060215\e2-103	53.9222	8.72222							614.468				236.692					368.808				4.24059			0.588019	0.123651			29.3673					26.8468					305.7	0	305.7	#DIV/0!	7.64263	4.5177
Europe	Portugal	Tagus River	Zhu et al., 2020, Earth and Planetary Science Letters, 536, p.116140.	ziyi zhu\180928\Tag2	ziyi zhu\180928\Tag2-026	38.9227	-8.99893							614.715				1647					2650			0.103	1.28		1.37	4.4	0.172			211.1					147.2					284	0	284	#DIV/0!	53.1805	31.9988
Europe	Hungary	Danube River	Zhu et al., 2020, Earth and Planetary Science Letters, 536, p.116140.	wang yan\070110\e2	wang yan\070110\E2-56	53.9222	8.72222							615.371				229.904					1270.12			0.062769	20.1067			9.33679	0.495557			129.248					57.0687					216.035	0	216.035	#DIV/0!	7.42345	15.6179
Europe	Italy	Po River	Zhu et al., 2020, Earth and Planetary Science Letters, 536, p.116140.	wang yan\070105\po	wang yan\070105\po-202	44.9525	12.4319							616.669				277.362								0.0442018	18.3945			2.57026	0.340375			42.1577					29.3108					140.567	0	140.567	#DIV/0!	8.95583	0.577865
Europe	Germany	Elbe River	Zhu et al., 2020, Earth and Planetary Science Letters, 536, p.116140.	ziyi zhu\180430\Elbe	ziyi zhu\180430\Elbe-010	53.831	8.82492							617				579					930			0.0076	21.1		2.86		1.12			94.3					46.46					45.3	0	45.3	#DIV/0!	18.6955	11.4848
Europe	Portugal	Tagus River	Zhu et al., 2020, Earth and Planetary Science Letters, 536, p.116140.	ziyi zhu\180928\Tag2	ziyi zhu\180929\Tag2-071	38.9227	-8.99893							617				323					1484			0.02	26.3		1.38	4.18	0.44			126.9					83.5					563	0	563	#DIV/0!	10.4294	18.1791
Europe	Germany	Elbe River	Zhu et al., 2020, Earth and Planetary Science Letters, 536, p.116140.	ziyi zhu\180501\Elbe	ziyi zhu\180501\Elbe-166	53.831	8.82492							617.2				346					682			0.0057	4.42		0.4		0.233			52.3					52					77.1	0	77.1	#DIV/0!	11.1721	8.32643
Europe	France	Rhone River	Zhu et al., 2020, Earth and Planetary Science Letters, 536, p.116140.	wang yan\061213\e12	wang yan\061213\e12-142	53.9222	8.72222							617.355				227.839					707.318				12.0781			2.35518	0.342746			62.25					42.6888					240.285	0	240.285	#DIV/0!	7.35676	8.68748
Europe	Hungary	Danube River	Zhu et al., 2020, Earth and Planetary Science Letters, 536, p.116140.	wang yan\070110\e2	wang yan\070110\E2-58	53.9222	8.72222							618.628				423.774					1938.34			0.076739	20.1226			7.76901	1.77762			171.602					101.938					137.771	0	137.771	#DIV/0!	13.6834	23.6496
Europe	Germany	Elbe River	Zhu et al., 2020, Earth and Planetary Science Letters, 536, p.116140.	ziyi zhu\180430\Elbe	ziyi zhu\180430\Elbe-074	53.831	8.82492							619.189				213.7					1058			0.0146	31.2		2.65		1.749			91.8					72.7					78.6	0	78.6	#DIV/0!	6.90023	13.1341
Europe	Germany	Rhine River	Zhu et al., 2020, Earth and Planetary Science Letters, 536, p.116140.	callen\060609\e10	callen\060609\e10-051	53.9222	8.72222							619.757				228.027									0.465231			0.545099	0.160151			24.5199					13.7349					449.917	0	449.917	#DIV/0!	7.36282	0.237375
Europe	Poland	Vistula River	Zhu et al., 2020, Earth and Planetary Science Letters, 536, p.116140.	ziyi zhu\180501\Vis2	ziyi zhu\180501\Vis2-013	54.3587	18.9465							620.2				223.8					598			0.008	2.73		2.48		0.326			58.5					27					86.3	0	86.3	#DIV/0!	7.22635	7.27983
Europe	Germany	Rhine River	Zhu et al., 2020, Earth and Planetary Science Letters, 536, p.116140.	callen\060609\e10	callen\060609\e10-089	53.9222	8.72222							620.272				402.803					909.08			0.038859	1.85431			4.0069	0.342761			84.7364					49.0945					141.955	0	141.955	#DIV/0!	13.0062	11.0703
Europe	France	Rhone River	Zhu et al., 2020, Earth and Planetary Science Letters, 536, p.116140.	wang yan\061213\e12	wang yan\061213\E12-045	53.9222	8.72222							621.495				577.822					1328.88			0.486715	23.502			8.97534	1.67236			127.293					69.2189					380.727	0	380.727	#DIV/0!	18.6575	16.3688
Europe	Hungary	Danube River	Zhu et al., 2020, Earth and Planetary Science Letters, 536, p.116140.	callen\060215\e2	callen\060215\e2-003	53.9222	8.72222							622.308				108.743					335.779				29.7596			1.44516	0.546654			28.6258					22.1003					91.8809	0	91.8809	#DIV/0!	3.51122	4.3051
Europe	Poland	Oder River	Zhu et al., 2020, Earth and Planetary Science Letters, 536, p.116140.	CALLEN\060223\E3	CALLEN\060223\E3-105	53.9222	8.72222							623.889				198.879					701.928				20.9827			3.61843	0.699323			65.8017					32.2161					121.212	0	121.212	#DIV/0!	6.42167	8.66316
Europe	Portugal	Tagus River	Zhu et al., 2020, Earth and Planetary Science Letters, 536, p.116140.	ziyi zhu\180928\Tag2	ziyi zhu\180929\Tag2-100	38.9227	-8.99893							626				255					700			0.092	10.14		0.86	1.96	0.837			51.4					68.6					83.2	0	83.2	#DIV/0!	8.23377	8.67987
Asia	India	Indus River	Zhu et al., 2020, Earth and Planetary Science Letters, 536, p.116140.	CALLEN\010827\IND	CALLEN\010827\IND-082	24.2079	67.7327							627.698				92.778								0.085047	4.56479		0.546232	0.13153	17.8626			27.9572					11.2518					285.324	0	285.324	#DIV/0!	2.99574	0.391715
Europe	Italy	Po River	Zhu et al., 2020, Earth and Planetary Science Letters, 536, p.116140.	callen\041216\po	callen\041216\po-145	44.9525	12.4319							628.811				195.612					508.631			0.592689	28.0959		1.32286	1.77437	0.640995			39.7797					41.5987					315.261	0	315.261	#DIV/0!	6.31617	6.43389
Europe	France	Rhone River	Zhu et al., 2020, Earth and Planetary Science Letters, 536, p.116140.	wang yan\061213\e12	wang yan\061213\e12-053	53.9222	8.72222							634.855				222.549					484.793				3.24104			2.07276	0.163277			46.4893					23.903					83.0195	0	83.0195	#DIV/0!	7.18596	5.91391
Europe	Poland	Oder River	Zhu et al., 2020, Earth and Planetary Science Letters, 536, p.116140.	CALLEN\060223\E3	CALLEN\060223\E3-142	53.9222	8.72222							635.767				145.816					421.068				1.64647			0.695314	0.560108			30.0137					45.1177					26.8988	0	26.8988	#DIV/0!	4.7083	5.199
Europe	Italy	Po River	Zhu et al., 2020, Earth and Planetary Science Letters, 536, p.116140.	callen\041216\po	callen\041216\po-051	44.9525	12.4319							637.015				102.757					456.699				5.41318		1.71176	2.43488	1.0657			38.3671					36.8466					58.0328	0	58.0328	#DIV/0!	3.31797	5.65759
Europe	France	Rhone River	Zhu et al., 2020, Earth and Planetary Science Letters, 536, p.116140.	wang yan\061213\e12	wang yan\061213\e12-023	53.9222	8.72222							637.166				155.022					1288			0.164898	74.0122			24.0282	8.20001			160.894					38.9412					204.285	0	204.285	#DIV/0!	5.00554	16.444
Asia	India	Indus River	Zhu et al., 2020, Earth and Planetary Science Letters, 536, p.116140.	CALLEN\010827\IND	CALLEN\010827\IND-060	24.2079	67.7327							641.396				88.1682								0.0903886	2.60194		1.43276	0.474047	36.3578			53.5271					21.7417					27.4717	0	27.4717	#DIV/0!	2.84689	0.725143
Europe	Hungary	Danube River	Zhu et al., 2020, Earth and Planetary Science Letters, 536, p.116140.	callen\060215\e2	callen\060215\e2-112	53.9222	8.72222							641.625				194.792					515.925			0.0633718	7.32815			4.86058	0.698704			52.4057					27.3206					273.558	0	273.558	#DIV/0!	6.2897	6.37172
Europe	Italy	Po River	Zhu et al., 2020, Earth and Planetary Science Letters, 536, p.116140.	wang yan\070105\po	wang yan\070105\po-191	44.9525	12.4319							642.498				353.773									9.4162			16.1213	1.26825			247.11					85.8435					353.123	0	353.123	#DIV/0!	11.4231	2.19396
Europe	Portugal	Tagus River	Zhu et al., 2020, Earth and Planetary Science Letters, 536, p.116140.	ziyi zhu\180928\Tag2	ziyi zhu\180929\Tag2-081	38.9227	-8.99893							643.167				249					393			0.091	4.76		1.63	2.48	0.279			51.5					8.34					400	0	400	#DIV/0!	8.04004	4.84954
Europe	Hungary	Danube River	Zhu et al., 2020, Earth and Planetary Science Letters, 536, p.116140.	callen\060215\e2	callen\060215\e2-125	53.9222	8.72222							644.145				240.731					775.554			0.0344635	7.94866			5.20921	1.121			75.8125					36.2541					161.825	0	161.825	#DIV/0!	7.77304	9.49659
Europe	Portugal	Tagus River	Zhu et al., 2020, Earth and Planetary Science Letters, 536, p.116140.	ziyi zhu\180928\Tag2	ziyi zhu\180928\Tag2-027	38.9227	-8.99893							644.3				157.2					549			0.06	16.7		1.49	2.54	0.74			41.8					49.7					337	0	337	#DIV/0!	5.07588	6.86843
Europe	France	Rhone River	Zhu et al., 2020, Earth and Planetary Science Letters, 536, p.116140.	wang yan\061213\e12	wang yan\061213\e12-110	53.9222	8.72222							645.214				1332.27					4009.86			0.413757	58.7084			59.8151	17.2687			503.822					160.846					1097.73	0	1097.73	#DIV/0!	43.018	50.0582
Europe	Portugal	Tagus River	Zhu et al., 2020, Earth and Planetary Science Letters, 536, p.116140.	ziyi zhu\180928\Tag2	ziyi zhu\180929\Tag2-116	38.9227	-8.99893							645.7				250					957			0.193	46.2		10.82	12.64	4.5			103.8					38.6					169	0	169	#DIV/0!	8.07233	12.1441
Asia	India	Ganges	Zhu et al., 2020, Earth and Planetary Science Letters, 536, p.116140.	callen\030820\gr8	callen\030820\gr8-23	23.8544	89.4217							645.876				292.284								0.0832139	27.2659		1.39192	3.60452	2.03933			111.696					78.6861					201.96	0	201.96	#DIV/0!	9.43764	1.37925
Europe	Poland	Vistula River	Zhu et al., 2020, Earth and Planetary Science Letters, 536, p.116140.	ziyi zhu\180501\Vis1	ziyi zhu\180501\Vis1-069	54.3587	18.9465							646.327				281.5					746			0.0087	7.98		1.13		0.593			62.9					46.1					54.3	0	54.3	#DIV/0!	9.08944	9.11072
Europe	Germany	Rhine River	Zhu et al., 2020, Earth and Planetary Science Letters, 536, p.116140.	callen\060609\e10	callen\060609\e10-060	53.9222	8.72222							647.902				180.336					482.638			0.032319	15.2589			1.27208	0.291933			36.6867					43.4686					158.096	0	158.096	#DIV/0!	5.82291	6.02268
Europe	Hungary	Danube River	Zhu et al., 2020, Earth and Planetary Science Letters, 536, p.116140.	callen\060215\e2	callen\060215\e2-077	53.9222	8.72222							648.049				145.35					1408.16			0.13943	122.894			16.2391	4.75798			142.622					63.196					648.861	0	648.861	#DIV/0!	4.69326	18.0961
Asia	India	Indus River	Zhu et al., 2020, Earth and Planetary Science Letters, 536, p.116140.	CALLEN\010827\IND	CALLEN\010827\IND-104	24.2079	67.7327							651.351				376.23								0.197353	24.191		2.37536	1.20033	84.6298			152.66					76.9228					594.035	0	594.035	#DIV/0!	12.1482	2.13432
Europe	Hungary	Danube River	Zhu et al., 2020, Earth and Planetary Science Letters, 536, p.116140.	wang yan\070110\e2	wang yan\070110\E2-33	53.9222	8.72222							652.333				204.302					600.526			0.0426677	1.40931			1.83815	0.176386			52.7191					36.6918					103.849	0	103.849	#DIV/0!	6.59678	7.31292
Europe	Portugal	Tagus River	Zhu et al., 2020, Earth and Planetary Science Letters, 536, p.116140.	ziyi zhu\180928\Tag2	ziyi zhu\180928\Tag2-034	38.9227	-8.99893							655.1				140					679			0.121	55.3		12.8	15	3.66			77.5					26.85					182	0	182	#DIV/0!	4.5205	8.87631
Europe	Portugal	Tagus River	Zhu et al., 2020, Earth and Planetary Science Letters, 536, p.116140.	ziyi zhu\180928\Tag2	ziyi zhu\180929\Tag2-097	38.9227	-8.99893							655.4				370					1746			0.28	8.25		4.15	8.5	0.37			174.6					75.9					470	0	470	#DIV/0!	11.947	21.2969
Asia	India	Ganges River	Zhu et al., 2020, Earth and Planetary Science Letters, 536, p.116140.	CALLEN\011025\GR8	CALLEN\011025\GR8-072	23.8544	89.4217							655.645				295.392								0.103923	45.488		1.17772	4.26282	1.207			123.232					109.098					194.372	0	194.372	#DIV/0!	9.53801	1.75165
Europe	Hungary	Danube River	Zhu et al., 2020, Earth and Planetary Science Letters, 536, p.116140.	callen\060215\e2	callen\060215\e2-113	53.9222	8.72222							657.453				461.824					1853.85			0.0986067	16.37			3.43004	0.305212			145.112					122.547					1358.44	0	1358.44	#DIV/0!	14.912	22.5889
Europe	Germany	Rhine River	Zhu et al., 2020, Earth and Planetary Science Letters, 536, p.116140.	callen\060609\e10	callen\060609\E10-174	53.9222	8.72222							659.088				193.623					501.958				4.62726			1.22	0.0691728			42.3006					34.1736					342.168	0	342.168	#DIV/0!	6.25195	6.14351
Europe	France	Rhone River	Zhu et al., 2020, Earth and Planetary Science Letters, 536, p.116140.	wang yan\061213\e12	wang yan\061213\e12-028	53.9222	8.72222							661.318				351.541					412.451				0.546748			2.3112	0.266188			57.7165					8.65178					302.606	0	302.606	#DIV/0!	11.351	5.06513
Europe	Poland	Vistula River	Zhu et al., 2020, Earth and Planetary Science Letters, 536, p.116140.	ziyi zhu\180501\Vis1	ziyi zhu\180501\Vis1-002	54.3587	18.9465							661.519				94.8					411				0.576		0.047		0.126			21					29.29					287.3	0	287.3	#DIV/0!	3.06103	4.92504
Europe	Poland	Vistula River	Zhu et al., 2020, Earth and Planetary Science Letters, 536, p.116140.	ziyi zhu\180501\Vis1	ziyi zhu\180501\Vis1-023	54.3587	18.9465							663.133				618					1540			0.083	4.78		2.69		0.257			146					79.6					478	0	478	#DIV/0!	19.9548	18.7312
Europe	Poland	Vistula River	Zhu et al., 2020, Earth and Planetary Science Letters, 536, p.116140.	ziyi zhu\180501\Vis1	ziyi zhu\180501\Vis1-064	54.3587	18.9465							666.925				212.9					257.3				2.07		0.86		0.083			27.7					9.2					117.2	0	117.2	#DIV/0!	6.87439	3.13858
Asia	India	Ganges River	Zhu et al., 2020, Earth and Planetary Science Letters, 536, p.116140.	CALLEN\011025\GR8	CALLEN\011025\GR8-059	23.8544	89.4217							667.313				180.599								0.1659	12.8697		2.3972	4.19933	0.383447			94.3706					49.6773					202.742	0	202.742	#DIV/0!	5.83142	1.00474
Europe	Germany	Rhine River	Zhu et al., 2020, Earth and Planetary Science Letters, 536, p.116140.	callen\060609\e10	callen\060609\e10-034	53.9222	8.72222							668.336				110.889								0.0393341	4.79953			0.797596				25.5308					20.6958					255.523	0	255.523	#DIV/0!	3.58053	0.315219
Europe	Hungary	Danube River	Zhu et al., 2020, Earth and Planetary Science Letters, 536, p.116140.	wang yan\070110\e2	wang yan\070110\E2-54	53.9222	8.72222							670.789				64.053					153.772				0.929425				0.163494			10.837					16.0707					86.577	0	86.577	#DIV/0!	2.06823	1.89595
Europe	Germany	Rhine River	Zhu et al., 2020, Earth and Planetary Science Letters, 536, p.116140.	callen\060609\e10	callen\060609\e10-037	53.9222	8.72222							671.191				220.566					822.315			0.00474723	11.6427			2.51984	0.209668			66.3276					35.6624					121.96	0	121.96	#DIV/0!	7.12191	9.96311
Europe	Poland	Vistula River	Zhu et al., 2020, Earth and Planetary Science Letters, 536, p.116140.	ziyi zhu\180501\Vis2	ziyi zhu\180501\Vis2-103	54.3587	18.9465							678.4				275.1					534			0.0081	13.39		1.04		0.403			44.9					30.91					119.7	0	119.7	#DIV/0!	8.88279	6.56518
Europe	Italy	Po River	Zhu et al., 2020, Earth and Planetary Science Letters, 536, p.116140.	callen\041216\po	callen\041216\po-056	44.9525	12.4319							687.436				230.502					699.441				22.2903		2.84472	4.07514	1.92111			63.0983					46.0115					75.0388	0	75.0388	#DIV/0!	7.44275	8.73752
Europe	Italy	Po River	Zhu et al., 2020, Earth and Planetary Science Letters, 536, p.116140.	callen\041216\po	callen\041216\po-001	44.9525	12.4319							696.383				167.233					866.118			0.0960606	30.3649		5.65653	8.42432	1.35162			86.865					42.3619					120.297	0	120.297	#DIV/0!	5.39984	10.8408
Europe	Hungary	Danube River	Zhu et al., 2020, Earth and Planetary Science Letters, 536, p.116140.	callen\060215\e2	callen\060215\e2-085	53.9222	8.72222							697.436				182.655					922.471				6.77636			4.91461	0.115668			89.3368					43.7377					92.7167	0	92.7167	#DIV/0!	5.8978	11.258
Europe	France	Rhone River	Zhu et al., 2020, Earth and Planetary Science Letters, 536, p.116140.	wang yan\061213\e12	wang yan\061213\e12-117	53.9222	8.72222							698.677				332.219					1366.59			0.123825	3.90465			8.10183	0.685982			136.162					71.4903					429.092	0	429.092	#DIV/0!	10.7271	16.7058
Europe	Germany	Rhine River	Zhu et al., 2020, Earth and Planetary Science Letters, 536, p.116140.	callen\060609\e10	callen\060609\E10-154	53.9222	8.72222							699.177				162.172								0.0430812	10.4822			1.04376	0.247842			26.5434					27.5131					312.135	0	312.135	#DIV/0!	5.23641	0.404262
Europe	Hungary	Danube River	Zhu et al., 2020, Earth and Planetary Science Letters, 536, p.116140.	callen\060215\e2	callen\060215\e2-047	53.9222	8.72222							700.834				154.212					691.485				6.41671			2.61634	0.738989			64.2972					35.4787					1097.43	0	1097.43	#DIV/0!	4.97939	8.44471
Europe	Hungary	Danube River	Zhu et al., 2020, Earth and Planetary Science Letters, 536, p.116140.	callen\060215\e2	callen\060215\e2-131	53.9222	8.72222							700.847				563.954					2187.77				26.9201			7.60085	2.65812			186.703					117.455					335.77	0	335.77	#DIV/0!	18.2097	26.6897
Europe	Germany	Rhine River	Zhu et al., 2020, Earth and Planetary Science Letters, 536, p.116140.	callen\060609\e10	callen\060609\E10-136	53.9222	8.72222							709.371				172.044									2.21619			0.989588				32.3908					36.6187					451.065	0	451.065	#DIV/0!	5.5552	0.430976
Asia	India	Ganges River	Zhu et al., 2020, Earth and Planetary Science Letters, 536, p.116140.	CALLEN\011025\GR8	CALLEN\011025\GR8-066	23.8544	89.4217							711.531				248.182								0.100458	38.4237		5.32521	15.5596	1.09165			327.977					134.723					1056.64	0	1056.64	#DIV/0!	8.01363	3.21071
Europe	Hungary	Danube River	Zhu et al., 2020, Earth and Planetary Science Letters, 536, p.116140.	callen\060215\e2	callen\060215\e2-115	53.9222	8.72222							713				155.449					398.595				6.56924			1.0143	0.318644			29.21					40.4612					164.77	0	164.77	#DIV/0!	5.01934	4.95032
Europe	Portugal	Tagus River	Zhu et al., 2020, Earth and Planetary Science Letters, 536, p.116140.	ziyi zhu\180928\Tag2	ziyi zhu\180929\Tag2-076	38.9227	-8.99893							713.8				250.2					1799			0.058	15.56		8.26	13.6	0.685			198.4					70.5					192.1	0	192.1	#DIV/0!	8.07879	22.1237
Europe	Portugal	Tagus River	Zhu et al., 2020, Earth and Planetary Science Letters, 536, p.116140.	ziyi zhu\180928\Tag2	ziyi zhu\180929\Tag2-104	38.9227	-8.99893							719.9				161.4					527			0.032	18		3.12	4.52	1.48			53.2					27.8					211	0	211	#DIV/0!	5.21149	6.60439
Asia	India	Ganges River	Zhu et al., 2020, Earth and Planetary Science Letters, 536, p.116140.	CALLEN\011025\GR8	CALLEN\011025\GR8-063	23.8544	89.4217							722.937				170.466								0.121615	14.7867		2.15616	3.50314	0.602544			77.2218					53.5142					281.067	0	281.067	#DIV/0!	5.50424	0.929635
Europe	Italy	Po River	Zhu et al., 2020, Earth and Planetary Science Letters, 536, p.116140.	wang yan\070105\po	wang yan\070105\po-176	44.9525	12.4319							723.38				38.0268									0.685137			0.353697	0.275993			11.034					4.81543					291.347	0	291.347	#DIV/0!	1.22786	0.104476
Europe	Italy	Po River	Zhu et al., 2020, Earth and Planetary Science Letters, 536, p.116140.	callen\041216\po	callen\041216\po-150	44.9525	12.4319							723.676				217.991					1114.89			0.0913285	18.5851		6.15254	10.1366	2.33101			117.61					50.7394					176.737	0	176.737	#DIV/0!	7.03879	13.8133
Europe	Hungary	Danube River	Zhu et al., 2020, Earth and Planetary Science Letters, 536, p.116140.	callen\060215\e2	callen\060215\e2-096	53.9222	8.72222							726.146				212.727					353.876				7.46897			1.23512	0.27162			29.399					23.0827					82.6035	0	82.6035	#DIV/0!	6.86881	4.35673
Europe	Germany	Elbe River	Zhu et al., 2020, Earth and Planetary Science Letters, 536, p.116140.	ziyi zhu\180501\Elbe	ziyi zhu\180501\Elbe-169	53.831	8.82492							728.3				378					1670			0.43	22.4		7		0.58			166					78.7					183	0	183	#DIV/0!	12.2054	20.4717
Asia	India	Indus River	Zhu et al., 2020, Earth and Planetary Science Letters, 536, p.116140.	CALLEN\010827\IND	CALLEN\010827\IND-011	24.2079	67.7327							730.03				335.869								0.0517191	6.99317		5.08669	0.960109	155.663			240.262					81.6133					351.468	0	351.468	#DIV/0!	10.845	3.06094
Europe	Hungary	Danube River	Zhu et al., 2020, Earth and Planetary Science Letters, 536, p.116140.	callen\060215\e2	callen\060215\e2-038	53.9222	8.72222							732.401				333.968					952.366			0.0806948	7.52504			3.16093	0.0906084			86.7949					47.7437					546.968	0	546.968	#DIV/0!	10.7836	11.5956
Europe	France	Rhone River	Zhu et al., 2020, Earth and Planetary Science Letters, 536, p.116140.	wang yan\061213\e12	wang yan\061213\e12-101	53.9222	8.72222							738.171				151.177					1135.25				23.7467			4.44423	1.32871			97.2503					78.3889					135.222	0	135.222	#DIV/0!	4.88139	14.0241
Europe	Italy	Po River	Zhu et al., 2020, Earth and Planetary Science Letters, 536, p.116140.	callen\041216\po	callen\041216\po-088	44.9525	12.4319							740.463				171.564					847.063				4.13076		3.45126	6.13724	0.591033			87.8545					38.1704					201.531	0	201.531	#DIV/0!	5.53968	10.3851
Europe	Hungary	Danube River	Zhu et al., 2020, Earth and Planetary Science Letters, 536, p.116140.	callen\060215\e2	callen\060215\e2-074	53.9222	8.72222							740.799				296.265					1050.32				9.43435			6.30797	1.05572			109.019					47.4369					102.216	0	102.216	#DIV/0!	9.56618	12.8728
Asia	India	Indus River	Zhu et al., 2020, Earth and Planetary Science Letters, 536, p.116140.	CALLEN\010827\IND	CALLEN\010827\IND-091	24.2079	67.7327							741.803				310.531								0.0738552	6.01102		2.15514	1.68569	73.8011			118.154					52.9743					243.254	0	243.254	#DIV/0!	10.0268	1.58494
Europe	Portugal	Tagus River	Zhu et al., 2020, Earth and Planetary Science Letters, 536, p.116140.	ziyi zhu\180928\Tag2	ziyi zhu\180929\Tag2-084	38.9227	-8.99893							742.024				572					1696			0.905	39.7		18.6	13.33	3.4			168					91.8					346.1	0	346.1	#DIV/0!	18.4695	21.1659
Asia	India	Indus River	Zhu et al., 2020, Earth and Planetary Science Letters, 536, p.116140.	CALLEN\010827\IND	CALLEN\010827\IND-111	24.2079	67.7327							745.021				202.383								0.153152	5.17011		6.7457	1.81503	113.789			141.497					39.5929					65.1497	0	65.1497	#DIV/0!	6.53481	1.94246
Europe	Italy	Po River	Zhu et al., 2020, Earth and Planetary Science Letters, 536, p.116140.	callen\041216\po	callen\041216\po-082	44.9525	12.4319							745.89				253.973					552.768				10.5225		1.46959	3.06855	0.298077			52.4612					25.5982					221.072	0	221.072	#DIV/0!	8.20061	6.79464
Asia	India	Indus River	Zhu et al., 2020, Earth and Planetary Science Letters, 536, p.116140.	CALLEN\010827\IND	CALLEN\010827\IND-107	24.2079	67.7327							746.85				209.696								0.0810288	2.72241		1.38583	1.49831	67.4131			123.277					59.3631					65.7301	0	65.7301	#DIV/0!	6.77094	1.58094
Europe	Hungary	Danube River	Zhu et al., 2020, Earth and Planetary Science Letters, 536, p.116140.	callen\060215\e2	callen\060215\e2-084	53.9222	8.72222							748.834				245.708					731.44				5.7742			0.814058	0.447621			55.5591					62.6089					343.892	0	343.892	#DIV/0!	7.93375	8.97691
Asia	India	Ganges	Zhu et al., 2020, Earth and Planetary Science Letters, 536, p.116140.	callen\030820\gr8	callen\030820\gr8-12	23.8544	89.4217							754.712				233.397									53.9713		0.740096	2.84705	0.755819			113.01					138.424					813.63	0	813.63	#DIV/0!	7.53623	1.90071
Europe	Italy	Po River	Zhu et al., 2020, Earth and Planetary Science Letters, 536, p.116140.	callen\041216\po	callen\041216\po-033	44.9525	12.4319							759.491				315.777					1308.65				21.7133		2.59713	5.00383	1.91739			109.238					85.8656					142.646	0	142.646	#DIV/0!	10.1962	16.1022
Asia	India	Indus River	Zhu et al., 2020, Earth and Planetary Science Letters, 536, p.116140.	CALLEN\010827\IND	CALLEN\010827\IND-042	24.2079	67.7327							762.195				201.276									11.4651		1.94602	2.2001	54.8197			70.2885					22.339					24.1953	0	24.1953	#DIV/0!	6.49906	1.03081
Europe	Hungary	Danube River	Zhu et al., 2020, Earth and Planetary Science Letters, 536, p.116140.	wang yan\070110\e2	wang yan\070110\E2-14	53.9222	8.72222							763.865				496.343					3308.67				7.36677			10.3876	1.5795			317.299					145.985					119.394	0	119.394	#DIV/0!	16.0266	40.1368
Europe	Germany	Rhine River	Zhu et al., 2020, Earth and Planetary Science Letters, 536, p.116140.	callen\060609\e10	callen\060609\e10-085	53.9222	8.72222							766.563				186.43					902.497			0.219231	10.3864			5.78338	0.149833			96.6336					42.7809					247.511	0	247.511	#DIV/0!	6.01971	11.1061
Europe	Hungary	Danube River	Zhu et al., 2020, Earth and Planetary Science Letters, 536, p.116140.	callen\060215\e2	callen\060215\e2-091	53.9222	8.72222							767.079				185.109					592.28				9.86493			2.92425	0.886211			55.0692					43.9383					87.0547	0	87.0547	#DIV/0!	5.97704	7.34797
Europe	Hungary	Danube River	Zhu et al., 2020, Earth and Planetary Science Letters, 536, p.116140.	callen\060215\e2	callen\060215\e2-122	53.9222	8.72222							771.735				580.585					3004.1			0.064003	10.2632			5.55288	0.279264			271.727					143.685					1039.25	0	1039.25	#DIV/0!	18.7467	36.3976
Europe	Hungary	Danube River	Zhu et al., 2020, Earth and Planetary Science Letters, 536, p.116140.	callen\060215\e2	callen\060215\e2-123	53.9222	8.72222							772.852				625.109					1912.88				5.47626			4.90758	0.619296			158.362					109.877					127.412	0	127.412	#DIV/0!	20.1843	23.1954
Asia	India	Indus River	Zhu et al., 2020, Earth and Planetary Science Letters, 536, p.116140.	CALLEN\010827\IND	CALLEN\010827\IND-014	24.2079	67.7327							773.768				200.906								0.0629743	11.708		0.823456	0.47398	54.5209			87.6204					33.7803					217.34	0	217.34	#DIV/0!	6.48712	1.18381
Asia	India	Ganges River	Zhu et al., 2020, Earth and Planetary Science Letters, 536, p.116140.	CALLEN\011025\GR9	CALLEN\011025\GR9-015	23.8544	89.4217							776.095				176.924									32.2561		1.9523	3.15677	0.754844			47.9556					35.2114					69.7315	0	69.7315	#DIV/0!	5.71274	0.76605
Europe	France	Rhone River	Zhu et al., 2020, Earth and Planetary Science Letters, 536, p.116140.	wang yan\061213\e12	wang yan\061213\e12-125	53.9222	8.72222							776.202				168.313					557.748				4.86821			3.00848	0.398744			53.1584					31.0663					122.866	0	122.866	#DIV/0!	5.43471	6.8359
Europe	Germany	Rhine River	Zhu et al., 2020, Earth and Planetary Science Letters, 536, p.116140.	callen\060609\e10	callen\060609\E10-186	53.9222	8.72222							778.84				429.712					1246.48			0.0729331	7.43169			3.72043	0.149007			108.589					61.5918					565.664	0	565.664	#DIV/0!	13.8751	15.1206
Asia	India	Indus River	Zhu et al., 2020, Earth and Planetary Science Letters, 536, p.116140.	CALLEN\010827\IND	CALLEN\010827\IND-100	24.2079	67.7327							779.559				97.7249								0.0850584	1.5826		0.651494	0.440794	16.4306			25.703					11.5519					54.482	0	54.482	#DIV/0!	3.15547	0.351637
Europe	Hungary	Danube River	Zhu et al., 2020, Earth and Planetary Science Letters, 536, p.116140.	callen\060215\e2	callen\060215\e2-025	53.9222	8.72222							780.813				582.476					2900.26			0.090482	54.1389			7.41838	0.832924			262.181					139.211					769.973	0	769.973	#DIV/0!	18.8077	35.4747
Europe	Germany	Rhine River	Zhu et al., 2020, Earth and Planetary Science Letters, 536, p.116140.	callen\060609\e10	callen\060609\e10-026	53.9222	8.72222							781.002				305.258					1043.51				15.2891			3.16111	0.20832			95.6454					57.054					148.592	0	148.592	#DIV/0!	9.85657	12.7841
Asia	India	Ganges	Zhu et al., 2020, Earth and Planetary Science Letters, 536, p.116140.	callen\030820\gr8	callen\030820\gr8-40	23.8544	89.4217							782.88				301.885									24.511		2.60636	4.65869	1.34384			111.287					95.5767					141.976	0	141.976	#DIV/0!	9.74767	1.46384
Europe	Italy	Po River	Zhu et al., 2020, Earth and Planetary Science Letters, 536, p.116140.	callen\041216\po	callen\041216\po-009	44.9525	12.4319							783.13				198.738					871.943				16.4424		1.33755	3.17929	0.281714			76.16					52.8546					374.248	0	374.248	#DIV/0!	6.41712	10.7285
Asia	India	Indus River	Zhu et al., 2020, Earth and Planetary Science Letters, 536, p.116140.	CALLEN\010827\IND	CALLEN\010827\IND-113	24.2079	67.7327							784.917				154.615									8.95927		0.858067	0.421417	29.4988			55.4571					30.1058					109.805	0	109.805	#DIV/0!	4.99241	0.780081
Asia	India	Ganges River	Zhu et al., 2020, Earth and Planetary Science Letters, 536, p.116140.	CALLEN\011025\GR9	CALLEN\011025\GR9-011	23.8544	89.4217							785.919				303.117								0.176655	10.5734		3.28387	5.06098	0.779041			89.0664					47.5414					160.657	0	160.657	#DIV/0!	9.78745	0.958056
Asia	India	Ganges River	Zhu et al., 2020, Earth and Planetary Science Letters, 536, p.116140.	CALLEN\011025\GR8	CALLEN\011025\GR8-010	23.8544	89.4217							788.174				257.195								0.115089	32.6753		2.55285	4.93874	2.12602			97.1708					68.5663					339.403	0	339.403	#DIV/0!	8.30464	1.28837
Europe	France	Rhone River	Zhu et al., 2020, Earth and Planetary Science Letters, 536, p.116140.	wang yan\061213\e12	wang yan\061213\e12-172	53.9222	8.72222							790.592				59.2422					447.601			0.0614142	18.3401			1.3887	0.7799			31.8403					43.0639					158.814	0	158.814	#DIV/0!	1.91289	5.62262
Europe	France	Rhone River	Zhu et al., 2020, Earth and Planetary Science Letters, 536, p.116140.	wang yan\061213\e12	wang yan\061213\e12-069	53.9222	8.72222							791.565				1109.35					2025.12				1.03939			5.46819	0.524202			193.097					81.3221					246.253	0	246.253	#DIV/0!	35.8203	24.48
Europe	Portugal	Tagus River	Zhu et al., 2020, Earth and Planetary Science Letters, 536, p.116140.	ziyi zhu\180928\Tag2	ziyi zhu\180929\Tag2-106	38.9227	-8.99893							791.579				343					852.9			0.075	6.67		1.68	3.24	0.245			76.9					48.3					294	0	294	#DIV/0!	11.0752	10.4261
Europe	Italy	Po River	Zhu et al., 2020, Earth and Planetary Science Letters, 536, p.116140.	callen\041216\po	callen\041216\po-058	44.9525	12.4319							796.142				229.702					1339.98				11.9654		1.19568	4.29042	0.867015			122.04					78.2557					477.504	0	477.504	#DIV/0!	7.41692	16.399
Asia	India	Ganges River	Zhu et al., 2020, Earth and Planetary Science Letters, 536, p.116140.	CALLEN\011025\GR9	CALLEN\011025\GR9-051	23.8544	89.4217							796.749				148.529									9.32356		1.06854	1.63012	0.334749			33.6488					22.3894					160.211	0	160.211	#DIV/0!	4.79592	0.422009
Asia	India	Ganges River	Zhu et al., 2020, Earth and Planetary Science Letters, 536, p.116140.	CALLEN\011025\GR9	CALLEN\011025\GR9-016	23.8544	89.4217							798.467				349.424									29.2127		1.35078	2.88669	0.675753			77.8192					83.0959					156.913	0	156.913	#DIV/0!	11.2827	1.19524
Europe	France	Rhone River	Zhu et al., 2020, Earth and Planetary Science Letters, 536, p.116140.	wang yan\061213\e12	wang yan\061213\e12-099	53.9222	8.72222							808.843				191.964					806.662			0.1215	16.3166			4.09151	2.55005			69.1532					59.1878					1484.84	0	1484.84	#DIV/0!	6.19838	9.9989
Asia	India	Ganges River	Zhu et al., 2020, Earth and Planetary Science Letters, 536, p.116140.	CALLEN\011025\GR9	CALLEN\011025\GR9-012	23.8544	89.4217							808.867				374.782									17.4821		0.938235	2.3625	0.515346			53.4144					45.0143					89.901	0	89.901	#DIV/0!	12.1014	0.736317
Asia	India	Ganges	Zhu et al., 2020, Earth and Planetary Science Letters, 536, p.116140.	callen\030303\gan	callen\030303\gan30-m6	23.8544	89.4217							809.286				261.599									3.05745		4.28573	8.42684	0.280354			147.615					78.1837					320.241	0	320.241	#DIV/0!	8.44685	1.46458
Asia	India	Ganges River	Zhu et al., 2020, Earth and Planetary Science Letters, 536, p.116140.	CALLEN\011025\GR8	CALLEN\011025\GR8-073	23.8544	89.4217							814.59				119.252								0.107498	5.48082		0.844707	1.03236	0.361006			20.0857					19.575					152.079	0	152.079	#DIV/0!	3.85056	0.290453
Europe	Portugal	Tagus River	Zhu et al., 2020, Earth and Planetary Science Letters, 536, p.116140.	ziyi zhu\180928\Tag2	ziyi zhu\180929\Tag2-063	38.9227	-8.99893							816.5				396					2961			0.054	21.4		6.25	12.37	3.33			265					169.8					294	0	294	#DIV/0!	12.7866	36.2088
Asia	India	Ganges River	Zhu et al., 2020, Earth and Planetary Science Letters, 536, p.116140.	CALLEN\011025\GR9	CALLEN\011025\GR9-003	23.8544	89.4217							816.949				297.653								0.15377	50.713		2.04149	4.91714	2.13641			93.2315					71.4162					211.268	0	211.268	#DIV/0!	9.611	1.40582
Asia	India	Indus River	Zhu et al., 2020, Earth and Planetary Science Letters, 536, p.116140.	CALLEN\010827\IND	CALLEN\010827\IND-040	24.2079	67.7327							817.23				228.121								0.596768	88.5874		5.95368	2.95493	109.919			149.741					49.8874					465.892	0	465.892	#DIV/0!	7.36588	2.62725
Europe	Hungary	Danube River	Zhu et al., 2020, Earth and Planetary Science Letters, 536, p.116140.	callen\060215\e2	callen\060215\e2-049	53.9222	8.72222							821.556				182.912					653.38				5.2551			1.69824	0.322085			59.6159					37.799					59.5324	0	59.5324	#DIV/0!	5.90611	7.98339
Europe	Germany	Rhine River	Zhu et al., 2020, Earth and Planetary Science Letters, 536, p.116140.	callen\060609\e10	callen\060609\e10-095	53.9222	8.72222							822.57				602.787					1251.11				16.9756			3.75676	0.560078			117.567					70.4797					169.171	0	169.171	#DIV/0!	19.4636	15.3493
Europe	Germany	Elbe River	Zhu et al., 2020, Earth and Planetary Science Letters, 536, p.116140.	ziyi zhu\180430\Elbe	ziyi zhu\180430\Elbe-098	53.831	8.82492							824.4				244.6					482.6			0.009	3		1.03		0.867			48.6					25.63					35.05	0	35.05	#DIV/0!	7.89797	5.90843
Asia	India	Indus River	Zhu et al., 2020, Earth and Planetary Science Letters, 536, p.116140.	CALLEN\010827\IND	CALLEN\010827\IND-127	24.2079	67.7327							825.531				193.279								0.0904476	3.46372		2.24167	0.285802	80.9057			118.771					37.9467					108.118	0	108.118	#DIV/0!	6.24085	1.52283
Asia	India	Ganges River	Zhu et al., 2020, Earth and Planetary Science Letters, 536, p.116140.	CALLEN\011025\GR9	CALLEN\011025\GR9-006	23.8544	89.4217							826.274				449.227									24.0229		1.32544	2.38539	0.75396			70.9063					96.4794					145.189	0	145.189	#DIV/0!	14.5052	1.18914
Asia	India	Ganges River	Zhu et al., 2020, Earth and Planetary Science Letters, 536, p.116140.	CALLEN\011025\GR9	CALLEN\011025\GR9-024	23.8544	89.4217							827.902				270.359								0.149164	6.60635		6.01478	10.7611	3.02258			165.475					63.3058					176.146	0	176.146	#DIV/0!	8.7297	1.56143
Europe	Poland	Vistula River	Zhu et al., 2020, Earth and Planetary Science Letters, 536, p.116140.	ziyi zhu\180501\Vis2	ziyi zhu\180501\Vis2-014	54.3587	18.9465							830.6				261.8					658			0.016	50.5		2.33		0.817			62.2					39					57.3	0	57.3	#DIV/0!	8.45334	8.38931
Asia	India	Ganges	Zhu et al., 2020, Earth and Planetary Science Letters, 536, p.116140.	callen\030303\gan	callen\030303\gan09-j5	23.8544	89.4217							831.536				274.958									24.7191		4.48911	8.00583	1.1809			122.398					51.775					224.685	0	224.685	#DIV/0!	8.87822	1.31765
Asia	India	Ganges River	Zhu et al., 2020, Earth and Planetary Science Letters, 536, p.116140.	CALLEN\011025\GR8	CALLEN\011025\GR8-032	23.8544	89.4217							832.109				464.584								0.183315	20.5771		5.10533	10.0067	2.53046			202.588					113.715					335.87	0	335.87	#DIV/0!	15.0011	2.16328
Asia	India	Ganges River	Zhu et al., 2020, Earth and Planetary Science Letters, 536, p.116140.	CALLEN\011025\GR9	CALLEN\011025\GR9-049	23.8544	89.4217							832.723				169.324								0.141465	3.20674		1.02452	1.61603	0.302157			40.2084					34.9965					465.283	0	465.283	#DIV/0!	5.46735	0.491161
Europe	Italy	Po River	Zhu et al., 2020, Earth and Planetary Science Letters, 536, p.116140.	callen\041216\po	callen\041216\po-045	44.9525	12.4319							836.951				61.1321					177.651			0.0835841	2.44275				0.200958			12.1544					19.555					43.0918	0	43.0918	#DIV/0!	1.97391	2.20422
Europe	Germany	Rhine River	Zhu et al., 2020, Earth and Planetary Science Letters, 536, p.116140.	callen\060609\e10	callen\060609\E10-152	53.9222	8.72222							843.567				221.881									1.79526			1.69511	0.127883			38.9688					23.7148					85.6833	0	85.6833	#DIV/0!	7.16437	0.400247
Asia	India	Ganges	Zhu et al., 2020, Earth and Planetary Science Letters, 536, p.116140.	callen\030820\gr8	callen\030820\gr8-18	23.8544	89.4217							845.254				189.7									7.49237		4.30569	6.86281	0.910297			106.82					57.4837					233.926	0	233.926	#DIV/0!	6.12528	1.12079
Asia	India	Ganges River	Zhu et al., 2020, Earth and Planetary Science Letters, 536, p.116140.	CALLEN\011025\GR8	CALLEN\011025\GR8-004	23.8544	89.4217							846.663				1004.01								0.14898	4.60204		2.07614	4.91838	0.277729			135.6					70.4008					281.184	0	281.184	#DIV/0!	32.4188	1.3196
Asia	India	Indus River	Zhu et al., 2020, Earth and Planetary Science Letters, 536, p.116140.	CALLEN\010827\IND	CALLEN\010827\IND-086	24.2079	67.7327							847.624				247.177									10.174		1.38168	0.671427	53.2508			83.1295					32.6086					52.1512	0	52.1512	#DIV/0!	7.98116	1.1349
Asia	India	Ganges River	Zhu et al., 2020, Earth and Planetary Science Letters, 536, p.116140.	CALLEN\011025\GR9	CALLEN\011025\GR9-031	23.8544	89.4217							851.065				231.536									17.6104		0.814376	1.46857	0.387331			62.2692					57.7702					219.076	0	219.076	#DIV/0!	7.47615	0.856969
Asia	India	Ganges River	Zhu et al., 2020, Earth and Planetary Science Letters, 536, p.116140.	CALLEN\011025\GR9	CALLEN\011025\GR9-032	23.8544	89.4217							852.422				379.604									11.2703		1.63046	3.10255	0.644537			72.461					52.8578					165.283	0	165.283	#DIV/0!	12.2572	0.864579
Asia	India	Ganges River	Zhu et al., 2020, Earth and Planetary Science Letters, 536, p.116140.	CALLEN\011025\GR9	CALLEN\011025\GR9-068	23.8544	89.4217							853.272				174.027									17.0019		1.10346	1.78154	0.425563			38.0547					32.8826					68.6062	0	68.6062	#DIV/0!	5.61922	0.565736
Europe	Germany	Rhine River	Zhu et al., 2020, Earth and Planetary Science Letters, 536, p.116140.	callen\060609\e10	callen\060609\E10-199	53.9222	8.72222							855.451				82.8877					675.594			0.0312585	11.1635			1.34886	0.100918			61.8651					37.5879					226.451	0	226.451	#DIV/0!	2.67639	8.28452
Europe	France	Rhone River	Zhu et al., 2020, Earth and Planetary Science Letters, 536, p.116140.	wang yan\061213\e12	wang yan\061213\e12-162	53.9222	8.72222							856.816				333.839					1292.05				3.41558			3.49969	0.313396			119.096					85.4398					208.974	0	208.974	#DIV/0!	10.7794	15.8046
Europe	Italy	Po River	Zhu et al., 2020, Earth and Planetary Science Letters, 536, p.116140.	callen\041216\po	callen\041216\po-054	44.9525	12.4319							859.166				101.318					218.838			0.0776935	4.88948		0.498884	0.818476				14.9271					22.2799					509.577	0	509.577	#DIV/0!	3.27147	2.72516
Asia	India	Ganges River	Zhu et al., 2020, Earth and Planetary Science Letters, 536, p.116140.	CALLEN\011025\GR8	CALLEN\011025\GR8-045	23.8544	89.4217							860.757				179.969									57.1867		2.41884	4.95935	1.58044			83.937					61.0255					396.76	0	396.76	#DIV/0!	5.81109	1.33358
Europe	Germany	Elbe River	Zhu et al., 2020, Earth and Planetary Science Letters, 536, p.116140.	ziyi zhu\180430\Elbe	ziyi zhu\180430\Elbe-103	53.831	8.82492							870.235				253.4					687			0.0424	7.67		1.29		0.262			63.2					38.2					117.7	0	117.7	#DIV/0!	8.18211	8.40071
Europe	Poland	Vistula River	Zhu et al., 2020, Earth and Planetary Science Letters, 536, p.116140.	ziyi zhu\180501\Vis1	ziyi zhu\180501\Vis1-020	54.3587	18.9465							870.7				137					551			0.0068	34.9		1.19		0.527			50.2					32.81					85.6	0	85.6	#DIV/0!	4.42364	6.95526
Europe	Poland	Vistula River	Zhu et al., 2020, Earth and Planetary Science Letters, 536, p.116140.	ziyi zhu\180501\Vis2	ziyi zhu\180501\Vis2-040	54.3587	18.9465							870.7				269					834			0.0104	6.02		2.63		0.534			88.4					36.4					36.7	0	36.7	#DIV/0!	8.68582	10.1981
Asia	India	Ganges River	Zhu et al., 2020, Earth and Planetary Science Letters, 536, p.116140.	CALLEN\011025\GR8	CALLEN\011025\GR8-039	23.8544	89.4217							871.125				159.466									3.945		0.797809	0.498628	0.422545			24.4803					17.8903					172.654	0	172.654	#DIV/0!	5.14905	0.292664
Europe	Hungary	Danube River	Zhu et al., 2020, Earth and Planetary Science Letters, 536, p.116140.	callen\060215\e2	callen\060215\e2-006	53.9222	8.72222							872.807				642.486					5528.24			0.210675	66.5283			29.0982	0.918319			549.743					192.512					1499.69	0	1499.69	#DIV/0!	20.7454	67.3439
Asia	India	Ganges River	Zhu et al., 2020, Earth and Planetary Science Letters, 536, p.116140.	CALLEN\011025\GR8	CALLEN\011025\GR8-021	23.8544	89.4217							874.696				348.423									8.80476		1.50524	2.94055	0.393648			64.6913					37.895					89.8321	0	89.8321	#DIV/0!	11.2503	0.710069
Asia	India	Ganges	Zhu et al., 2020, Earth and Planetary Science Letters, 536, p.116140.	callen\030820\gr8	callen\030820\gr8-33	23.8544	89.4217							878.352				169.591									1.84332		0.73377	1.11319	0.622817			7.53286					4.25293					11.8584	0	11.8584	#DIV/0!	5.47596	0.100403
Europe	Germany	Fehrman Island	Zhu et al., 2020, Earth and Planetary Science Letters, 536, p.116140.	callen\051012\e5	callen\051012\e5-051	53.9222	8.72222							879.972				222.518					433.656			0.114522	20.6025			2.96013	1.18266			45.1419					21.6805					117.754	0	117.754	#DIV/0!	7.18496	5.45505
Asia	India	Ganges	Zhu et al., 2020, Earth and Planetary Science Letters, 536, p.116140.	callen\030303\gan	callen\030303\gan20-l1	23.8544	89.4217							880.238				170.228									3.12145		0.481784	1.46016	0.177305			36.7936					28.4592					70.9453	0	70.9453	#DIV/0!	5.49653	0.425542
Asia	India	Ganges River	Zhu et al., 2020, Earth and Planetary Science Letters, 536, p.116140.	CALLEN\011025\GR8	CALLEN\011025\GR8-001	23.8544	89.4217							881.192				1066.37									0.699821		1.17849	3.63219	0.237311			132.661					50.9854					258.218	0	258.218	#DIV/0!	34.4323	1.1466
Asia	India	Ganges	Zhu et al., 2020, Earth and Planetary Science Letters, 536, p.116140.	callen\030820\gr8	callen\030820\gr8-35	23.8544	89.4217							883.824				131.139									8.19944			0.756263	0.240035			17.1946					23.7059					113.511	0	113.511	#DIV/0!	4.2344	0.306409
Asia	India	Ganges River	Zhu et al., 2020, Earth and Planetary Science Letters, 536, p.116140.	CALLEN\011025\GR9	CALLEN\011025\GR9-021	23.8544	89.4217							884.52				378.18								0.139885	5.45227		5.32329	9.60964	0.814731			199.138					90.5305					154.991	0	154.991	#DIV/0!	12.2112	1.88888
Asia	India	Indus River	Zhu et al., 2020, Earth and Planetary Science Letters, 536, p.116140.	CALLEN\010827\IND	CALLEN\010827\IND-026	24.2079	67.7327							884.868				226.716									8.38476		0.899868	0.172003	38.485			63.6281					24.639					273.818	0	273.818	#DIV/0!	7.3205	0.852775
Europe	Poland	Vistula River	Zhu et al., 2020, Earth and Planetary Science Letters, 536, p.116140.	ziyi zhu\180501\Vis1	ziyi zhu\180501\Vis1-057	54.3587	18.9465							885.8				226					520.1			0.0183	39.38		2.72		1.17			51.6					28.82					59.9	0	59.9	#DIV/0!	7.29738	6.64039
Europe	Germany	Elbe River	Zhu et al., 2020, Earth and Planetary Science Letters, 536, p.116140.	ziyi zhu\180430\Elbe	ziyi zhu\180430\Elbe-100	53.831	8.82492							886				296					1176			0.0103	16.01		2.56		0.4			114.4					54.9					115.4	0	115.4	#DIV/0!	9.55764	14.3808
Asia	India	Ganges River	Zhu et al., 2020, Earth and Planetary Science Letters, 536, p.116140.	CALLEN\011025\GR9	CALLEN\011025\GR9-058	23.8544	89.4217							887.275				172.513									24.9128		1.19462	2.88029	0.601215			72.0492					51.3038					359.251	0	359.251	#DIV/0!	5.57032	0.945757
Europe	France	Rhone River	Zhu et al., 2020, Earth and Planetary Science Letters, 536, p.116140.	wang yan\061213\e12	wang yan\061213\e12-054	53.9222	8.72222							888.611				283.185					513.007			0.398235	19.0294			2.04917	0.744057			41.3612					38.4528					87.0958	0	87.0958	#DIV/0!	9.14385	6.40208
Europe	Germany	Elbe River	Zhu et al., 2020, Earth and Planetary Science Letters, 536, p.116140.	ziyi zhu\180430\Elbe	ziyi zhu\180430\Elbe-045	53.831	8.82492							889				133.6					311.5			0.0181	8.94		1.54		0.187			34.5					18.05					9.1	0	9.1	#DIV/0!	4.31385	3.89524
Asia	India	Ganges River	Zhu et al., 2020, Earth and Planetary Science Letters, 536, p.116140.	CALLEN\011025\GR8	CALLEN\011025\GR8-024	23.8544	89.4217							889.706				358.937								0.385205	89.873		4.81731	7.32243	1.8715			95.4058					58.2517					1029.12	0	1029.12	#DIV/0!	11.5898	1.65865
Europe	Germany	Elbe River	Zhu et al., 2020, Earth and Planetary Science Letters, 536, p.116140.	ziyi zhu\180501\Elbe	ziyi zhu\180501\Elbe-164	53.831	8.82492							891.8				243					645			0.275	34.8		1.2		0.315			54.2					47.9					275.6	0	275.6	#DIV/0!	7.8463	8.12336
Europe	Italy	Po River	Zhu et al., 2020, Earth and Planetary Science Letters, 536, p.116140.	callen\041216\po	callen\041216\po-092	44.9525	12.4319							891.979				53.5977					219.666				1.25097			0.446586				15.2867					24.0766					167.011	0	167.011	#DIV/0!	1.73063	2.71448
Europe	Poland	Vistula River	Zhu et al., 2020, Earth and Planetary Science Letters, 536, p.116140.	ziyi zhu\180501\Vis1	ziyi zhu\180501\Vis1-018	54.3587	18.9465							894.8				288.3					757			0.0191	17.3		1.64		0.885			70.4					45.4					63.9	0	63.9	#DIV/0!	9.30901	9.34866
Europe	Poland	Oder River	Zhu et al., 2020, Earth and Planetary Science Letters, 536, p.116140.	CALLEN\060223\E3	CALLEN\060223\E3-040	53.9222	8.72222							896.658				309.317					1155.3			0.0566805	5.71787			9.30667	1.04443			123.365					47.5787					79.8005	0	79.8005	#DIV/0!	9.98764	14.1365
Asia	India	Indus River	Zhu et al., 2020, Earth and Planetary Science Letters, 536, p.116140.	CALLEN\010827\IND	CALLEN\010827\IND-098	24.2079	67.7327							897.305				348.872									0.13952		0.340762		48.8667			37.809					6.90373					449.242	0	449.242	#DIV/0!	11.2648	0.596971
Europe	Germany	Elbe River	Zhu et al., 2020, Earth and Planetary Science Letters, 536, p.116140.	ziyi zhu\180430\Elbe	ziyi zhu\180430\Elbe-041	53.831	8.82492							897.8				325.1					1116			0.0047	23.6		2.33		1.16			105.8					63.2					99	0	99	#DIV/0!	10.4973	13.7579
Europe	Germany	Rhine River	Zhu et al., 2020, Earth and Planetary Science Letters, 536, p.116140.	callen\060609\e10	callen\060609\E10-167	53.9222	8.72222							900.696				77.0355					84.729			0.00808496	9.27462			1.65464	0.622295			10.7107					1.62856					122.513	0	122.513	#DIV/0!	2.48742	1.10965
Asia	India	Indus River	Zhu et al., 2020, Earth and Planetary Science Letters, 536, p.116140.	CALLEN\010827\IND	CALLEN\010827\IND-015	24.2079	67.7327							902.232				457.719								0.0594893	7.56719		5.46045	0.361498	134.218			174.449					48.6571					287.457	0	287.457	#DIV/0!	14.7794	2.3293
Europe	Poland	Vistula River	Zhu et al., 2020, Earth and Planetary Science Letters, 536, p.116140.	ziyi zhu\180501\Vis2	ziyi zhu\180501\Vis2-076	54.3587	18.9465							909				276					824			0.094	37.14		7.8		2.93			89.6					35.44					40.15	0	40.15	#DIV/0!	8.91185	10.3619
Europe	Hungary	Danube River	Zhu et al., 2020, Earth and Planetary Science Letters, 536, p.116140.	callen\060215\e2	callen\060215\e2-032	53.9222	8.72222							912.57				91.4051					450.812			0.0340845	23.2466			1.20297	0.479249			29.3148					47.1625					657.499	0	657.499	#DIV/0!	2.95141	5.69823
Europe	Poland	Vistula River	Zhu et al., 2020, Earth and Planetary Science Letters, 536, p.116140.	ziyi zhu\180501\Vis2	ziyi zhu\180501\Vis2-043	54.3587	18.9465							912.7				219					842			0.217	5.53		3.75		0.443			87.9					36.5					56.6	0	56.6	#DIV/0!	7.07136	10.2908
Europe	Poland	Vistula River	Zhu et al., 2020, Earth and Planetary Science Letters, 536, p.116140.	ziyi zhu\180501\Vis2	ziyi zhu\180501\Vis2-055	54.3587	18.9465							912.7				187					623				38.98		1.79		1.51			58.1					38.11					142	0	142	#DIV/0!	6.0381	7.88376
Europe	Germany	Fehrman Island	Zhu et al., 2020, Earth and Planetary Science Letters, 536, p.116140.	callen\051012\e5	callen\051012\e5-063	53.9222	8.72222							915.456				64.8737					85.8351				11.868			1.22938	0.459838			12.2503					2.36168					86.4312	0	86.4312	#DIV/0!	2.09473	1.15032
Europe	Poland	Vistula River	Zhu et al., 2020, Earth and Planetary Science Letters, 536, p.116140.	ziyi zhu\180501\Vis2	ziyi zhu\180501\Vis2-086	54.3587	18.9465							918.6				274					763			0.042	30.8		3.09		1.67			77.5					36.2					53.1	0	53.1	#DIV/0!	8.84727	9.51902
Europe	Poland	Vistula River	Zhu et al., 2020, Earth and Planetary Science Letters, 536, p.116140.	ziyi zhu\180501\Vis1	ziyi zhu\180501\Vis1-077	54.3587	18.9465							920				242					929			0.074	5.65		2.94		0.49			92.2					43.2					105.9	0	105.9	#DIV/0!	7.81401	11.3287
Europe	Poland	Vistula River	Zhu et al., 2020, Earth and Planetary Science Letters, 536, p.116140.	ziyi zhu\180501\Vis2	ziyi zhu\180501\Vis2-007	54.3587	18.9465							920				129.7					392			0.077	36.6		1.3		0.53			31.3					30.7					135.4	0	135.4	#DIV/0!	4.18792	5.05179
Europe	Poland	Vistula River	Zhu et al., 2020, Earth and Planetary Science Letters, 536, p.116140.	ziyi zhu\180501\Vis2	ziyi zhu\180501\Vis2-046	54.3587	18.9465							921.6				257					813				26.42		1.2		0.595			70					57.9					131	0	131	#DIV/0!	8.29835	10.1075
Asia	India	Ganges River	Zhu et al., 2020, Earth and Planetary Science Letters, 536, p.116140.	CALLEN\011025\GR8	CALLEN\011025\GR8-025	23.8544	89.4217							923.67				145.629								0.117351	57.8047		1.54721	2.50076	0.762917			52.152					56.0279					738.575	0	738.575	#DIV/0!	4.70227	1.08691
Europe	Poland	Oder River	Zhu et al., 2020, Earth and Planetary Science Letters, 536, p.116140.	CALLEN\060223\E3	CALLEN\060223\E3-144	53.9222	8.72222							924.513				320.325					692.36				40.9215			3.0589	0.676814			65.6988					43.88					63.9882	0	63.9882	#DIV/0!	10.3431	8.76
Europe	Germany	Elbe River	Zhu et al., 2020, Earth and Planetary Science Letters, 536, p.116140.	ziyi zhu\180501\Elbe	ziyi zhu\180501\Elbe-179	53.831	8.82492							925.367				303					992			0.0172	25.04		1.74		0.764			93.4					59.8					120.2	0	120.2	#DIV/0!	9.78366	12.271
Europe	Germany	Rhine River	Zhu et al., 2020, Earth and Planetary Science Letters, 536, p.116140.	callen\060609\e10	callen\060609\e10-058	53.9222	8.72222							926.932				465.073					746.256				7.44064			1.59824	0.169567			62.5631					57.2066					121.215	0	121.215	#DIV/0!	15.0169	9.17108
Europe	Portugal	Tagus River	Zhu et al., 2020, Earth and Planetary Science Letters, 536, p.116140.	ziyi zhu\180928\Tag2	ziyi zhu\180929\Tag2-109	38.9227	-8.99893							928.656				223					2235			0.0165	17.03		3.52	9.17	0.273			215					97.8					275	0	275	#DIV/0!	7.20052	27.2314
Asia	India	Indus River	Zhu et al., 2020, Earth and Planetary Science Letters, 536, p.116140.	CALLEN\010827\IND	CALLEN\010827\IND-117	24.2079	67.7327							929.706				552.434									4.01352		1.00994	0.292222	83.128			124.973					44.1856					446.544	0	446.544	#DIV/0!	17.8377	1.60604
Europe	Poland	Oder River	Zhu et al., 2020, Earth and Planetary Science Letters, 536, p.116140.	CALLEN\060223\E3	CALLEN\060223\E3-068	53.9222	8.72222							930.368				271.569					773.494				10.0021			4.71257	1.12092			81.538					33.8189					49.7963	0	49.7963	#DIV/0!	8.76878	9.50585
Asia	India	Ganges River	Zhu et al., 2020, Earth and Planetary Science Letters, 536, p.116140.	CALLEN\011025\GR8	CALLEN\011025\GR8-061	23.8544	89.4217							930.843				254.557								0.149091	40.112		1.78759	5.04943	0.255375			133.011					87.0901					1173.05	0	1173.05	#DIV/0!	8.21947	1.65122
Europe	Poland	Oder River	Zhu et al., 2020, Earth and Planetary Science Letters, 536, p.116140.	CALLEN\060223\E3	CALLEN\060223\E3-034	53.9222	8.72222							931.418				503.041					966.393				23.9684			6.75424	2.09952			101.093					46.6373					37.627	0	37.627	#DIV/0!	16.2429	11.989
Europe	Poland	Oder River	Zhu et al., 2020, Earth and Planetary Science Letters, 536, p.116140.	CALLEN\060223\E3	CALLEN\060223\E3-127	53.9222	8.72222							931.868				430.459					864.284				35.475			4.33121	1.2259			84.4457					47.4074					40.1096	0	40.1096	#DIV/0!	13.8992	10.8026
Europe	Germany	Fehrman Island	Zhu et al., 2020, Earth and Planetary Science Letters, 536, p.116140.	callen\051012\e5	callen\051012\e5-062	53.9222	8.72222							932.131				81.8132					192.015				22.757			0.62952	0.191477			13.3432					24.4883					135.908	0	135.908	#DIV/0!	2.64169	2.54982
Europe	Poland	Vistula River	Zhu et al., 2020, Earth and Planetary Science Letters, 536, p.116140.	ziyi zhu\180501\Vis2	ziyi zhu\180501\Vis2-018	54.3587	18.9465							936.2				228.9					572			0.0169	22.64		1.7		1.08			57.4					31.5					14.1	0	14.1	#DIV/0!	7.39102	7.14804
Europe	Germany	Rhine River	Zhu et al., 2020, Earth and Planetary Science Letters, 536, p.116140.	callen\060609\e10	callen\060609\e10-048	53.9222	8.72222							936.461				345.563					1069.91			0.0573131	23.1255			2.9542	0.868666			82.4839					97.8094					418.611	0	418.611	#DIV/0!	11.158	13.2923
Europe	Poland	Oder River	Zhu et al., 2020, Earth and Planetary Science Letters, 536, p.116140.	CALLEN\060223\E3	CALLEN\060223\E3-096	53.9222	8.72222							937.914				239.748					1212.61			0.124036	3.89361			13.1585	2.17116			142.531					43.8472					40.4539	0	40.4539	#DIV/0!	7.7413	14.8983
Europe	Germany	Fehrman Island	Zhu et al., 2020, Earth and Planetary Science Letters, 536, p.116140.	callen\051012\e5	callen\051012\e5-069	53.9222	8.72222							938.387				378.167					914.476			0.208808	70.03			4.19343	0.83028			83.794					57.8124					125.757	0	125.757	#DIV/0!	12.2107	11.6673
Europe	France	Rhone River	Zhu et al., 2020, Earth and Planetary Science Letters, 536, p.116140.	wang yan\061213\e12	wang yan\061213\e12-003	53.9222	8.72222							939.832				404.557					1618.31				21.6299			9.24003	1.65737			154.279					71.8975					132.136	0	132.136	#DIV/0!	13.0629	19.7907
Europe	France	Rhone River	Zhu et al., 2020, Earth and Planetary Science Letters, 536, p.116140.	wang yan\061213\e12	wang yan\061213\e12-152	53.9222	8.72222							939.883				452.462					1167.86				5.95793			6.62014	0.567247			116.24					53.932					211.91	0	211.91	#DIV/0!	14.6097	14.2505
Asia	India	Indus River	Zhu et al., 2020, Earth and Planetary Science Letters, 536, p.116140.	CALLEN\010827\IND	CALLEN\010827\IND-077	24.2079	67.7327							940.092				286.16								0.302447	2.35041		1.01467	0.850529	27.2406			76.3046					78.4319					1344.66	0	1344.66	#DIV/0!	9.23992	1.12861
Europe	Germany	Elbe River	Zhu et al., 2020, Earth and Planetary Science Letters, 536, p.116140.	ziyi zhu\180430\Elbe	ziyi zhu\180430\Elbe-131	53.831	8.82492							940.224				234.8					693			0.113	22.41		1.1		0.378			59.6					50.37					165	0	165	#DIV/0!	7.58153	8.62076
Europe	Germany	Elbe River	Zhu et al., 2020, Earth and Planetary Science Letters, 536, p.116140.	ziyi zhu\180430\Elbe	ziyi zhu\180430\Elbe-088	53.831	8.82492							942.806				337					3199			0.113	22.88		4.96		1.3			316.6					137					241.5	0	241.5	#DIV/0!	10.8815	38.9225
Europe	Poland	Oder River	Zhu et al., 2020, Earth and Planetary Science Letters, 536, p.116140.	CALLEN\060223\E3	CALLEN\060223\E3-178	53.9222	8.72222							943.407				176.476					727.953				34.6845			9.40864	2.35231			83.8338					32.062					27.6202	0	27.6202	#DIV/0!	5.69828	9.21316
Europe	Hungary	Danube River	Zhu et al., 2020, Earth and Planetary Science Letters, 536, p.116140.	callen\060215\e2	callen\060215\e2-148	53.9222	8.72222							943.954				380.698					1884.22				18.1303			6.75866	0.137173			164.781					107.673					323.816	0	323.816	#DIV/0!	12.2925	22.9994
Europe	Germany	Fehrman Island	Zhu et al., 2020, Earth and Planetary Science Letters, 536, p.116140.	callen\051012\e5	callen\051012\e5-082	53.9222	8.72222							944.797				113.667					349.015				6.16626			0.98676	0.195528			28.7419					28.1871					198.313	0	198.313	#DIV/0!	3.67023	4.31573
Europe	Poland	Vistula River	Zhu et al., 2020, Earth and Planetary Science Letters, 536, p.116140.	ziyi zhu\180501\Vis2	ziyi zhu\180501\Vis2-058	54.3587	18.9465							944.9				259.9					815			0.0129	8.1		1.16		0.141			73.3					43					168.7	0	168.7	#DIV/0!	8.39199	9.93128
Europe	Poland	Oder River	Zhu et al., 2020, Earth and Planetary Science Letters, 536, p.116140.	CALLEN\060223\E3	CALLEN\060223\E3-121	53.9222	8.72222							946.154				278.012					521.737				16.1788			2.11752	0.593468			48.3998					32.568					52.6534	0	52.6534	#DIV/0!	8.97682	6.48622
Asia	India	Indus River	Zhu et al., 2020, Earth and Planetary Science Letters, 536, p.116140.	CALLEN\010827\IND	CALLEN\010827\IND-108	24.2079	67.7327							947.231				1093.07								0.0777315	1.32616		1.09441	0.12465	186.709			328.957					120.175					371.207	0	371.207	#DIV/0!	35.2944	3.95786
Europe	Poland	Oder River	Zhu et al., 2020, Earth and Planetary Science Letters, 536, p.116140.	CALLEN\060223\E3	CALLEN\060223\E3-155	53.9222	8.72222							947.459				136.723					568.631				43.427			2.83367	0.697246			46.3685					38.242					227.015	0	227.015	#DIV/0!	4.41469	7.23357
Europe	Poland	Oder River	Zhu et al., 2020, Earth and Planetary Science Letters, 536, p.116140.	CALLEN\060223\E3	CALLEN\060223\E3-165	53.9222	8.72222							947.505				376.557					651.578				26.1254			3.27191	0.963277			63.1716					36.3338					25.8055	0	25.8055	#DIV/0!	12.1588	8.14028
Europe	Germany	Fehrman Island	Zhu et al., 2020, Earth and Planetary Science Letters, 536, p.116140.	callen\051012\e5	callen\051012\e5-048	53.9222	8.72222							947.853				338.351					1039.29			0.072895	15.3566			5.98395	1.7955			101.164					49.8871					65.733	0	65.733	#DIV/0!	10.9251	12.7599
Europe	Germany	Elbe River	Zhu et al., 2020, Earth and Planetary Science Letters, 536, p.116140.	ziyi zhu\180430\Elbe	ziyi zhu\180430\Elbe-070	53.831	8.82492							948				339.9					683.8			0.056	20.02		1.85		1.309			65.4					35.12					11.71	0	11.71	#DIV/0!	10.9751	8.45968
Europe	Germany	Fehrman Island	Zhu et al., 2020, Earth and Planetary Science Letters, 536, p.116140.	callen\051012\e5	callen\051012\e5-018	53.9222	8.72222							948.338				283.955					1261.22			0.292757	65.4664			25.9906	4.88941			150.211					42.7007					48.3064	0	48.3064	#DIV/0!	9.16872	16.0297
Asia	India	Ganges River	Zhu et al., 2020, Earth and Planetary Science Letters, 536, p.116140.	CALLEN\011025\GR8	CALLEN\011025\GR8-012	23.8544	89.4217							949.314				224.08								0.102852	3.37526		3.80256	6.82104	2.96857			122.589					71.5713					309.345	0	309.345	#DIV/0!	7.2354	1.27946
Europe	Germany	Fehrman Island	Zhu et al., 2020, Earth and Planetary Science Letters, 536, p.116140.	callen\051012\e5	callen\051012\e5-100	53.9222	8.72222							949.658				323.587					790.119			0.128041	3.28788			1.12347	0.147266			56.4053					69.3082					852.235	0	852.235	#DIV/0!	10.4484	9.66371
Europe	Germany	Elbe River	Zhu et al., 2020, Earth and Planetary Science Letters, 536, p.116140.	ziyi zhu\180430\Elbe	ziyi zhu\180430\Elbe-094	53.831	8.82492							952.104				529					1801			0.0549	32.61		11.09		4.75			198.4					73.5					32.66	0	32.66	#DIV/0!	17.081	22.241
Asia	India	Ganges River	Zhu et al., 2020, Earth and Planetary Science Letters, 536, p.116140.	CALLEN\011025\GR8	CALLEN\011025\GR8-006	23.8544	89.4217							952.83				900.546								0.0154806	5.16958		1.30286	2.86124				125.734					71.1568					835.253	0	835.253	#DIV/0!	29.078	1.24543
Asia	India	Indus River	Zhu et al., 2020, Earth and Planetary Science Letters, 536, p.116140.	CALLEN\010827\IND	CALLEN\010827\IND-110	24.2079	67.7327							954.916				171.587								0.085613	5.05211		3.12197	1.53498	141.91			237.249					92.8398					305.726	0	305.726	#DIV/0!	5.54041	2.99266
Europe	Germany	Fehrman Island	Zhu et al., 2020, Earth and Planetary Science Letters, 536, p.116140.	callen\051012\e5	callen\051012\e5-007	53.9222	8.72222							958.085				230.08					590.168			0.100897	44.7628			7.09064	1.6249			59.4972					27.024					40.4246	0	40.4246	#DIV/0!	7.42913	7.53719
Europe	Germany	Elbe River	Zhu et al., 2020, Earth and Planetary Science Letters, 536, p.116140.	ziyi zhu\180430\Elbe	ziyi zhu\180430\Elbe-065	53.831	8.82492							959.4				374					1035			0.0136	19.39		3.85		1.388			106.5					48.6					44.3	0	44.3	#DIV/0!	12.0762	12.7497
Europe	Poland	Vistula River	Zhu et al., 2020, Earth and Planetary Science Letters, 536, p.116140.	ziyi zhu\180501\Vis1	ziyi zhu\180501\Vis1-036	54.3587	18.9465							959.4				70					141.6			0.0098	1.216		0.075		0.306			13.97					4.42					129.9	0	129.9	#DIV/0!	2.26025	1.71531
Europe	Poland	Oder River	Zhu et al., 2020, Earth and Planetary Science Letters, 536, p.116140.	CALLEN\060223\E3	CALLEN\060223\E3-019	53.9222	8.72222							962.8				327.999					825.658			0.297963	48.4952			3.44363	0.765815			75.8309					52.1682					83.7555	0	83.7555	#DIV/0!	10.5909	10.4285
Europe	Germany	Elbe River	Zhu et al., 2020, Earth and Planetary Science Letters, 536, p.116140.	ziyi zhu\180430\Elbe	ziyi zhu\180430\Elbe-109	53.831	8.82492							965.1				255.6					765			0.0309	7.1		2.81		0.708			77.4					37.4					78.6	0	78.6	#DIV/0!	8.25315	9.37024
Europe	Poland	Vistula River	Zhu et al., 2020, Earth and Planetary Science Letters, 536, p.116140.	ziyi zhu\180501\Vis2	ziyi zhu\180501\Vis2-020	54.3587	18.9465							965.1				345					1060			0.0119	29.8		2.86		1.85			104					55					61.2	0	61.2	#DIV/0!	11.1398	13.1226
Europe	Germany	Elbe River	Zhu et al., 2020, Earth and Planetary Science Letters, 536, p.116140.	ziyi zhu\180430\Elbe	ziyi zhu\180430\Elbe-022	53.831	8.82492							968				312					1244			0.371	94.9		28.1		6.11			158.8					46.67					27.39	0	27.39	#DIV/0!	10.0743	16.1523
Europe	Poland	Vistula River	Zhu et al., 2020, Earth and Planetary Science Letters, 536, p.116140.	ziyi zhu\180501\Vis1	ziyi zhu\180501\Vis1-056	54.3587	18.9465							968				281.8					1284			0.06	11.38		5.96		0.96			133.7					55.9					119.5	0	119.5	#DIV/0!	9.09913	15.7147
Europe	Poland	Vistula River	Zhu et al., 2020, Earth and Planetary Science Letters, 536, p.116140.	ziyi zhu\180501\Vis2	ziyi zhu\180501\Vis2-012	54.3587	18.9465							968				235					914			0.114	39.4		10.35		3.24			100.9					38.1					47.9	0	47.9	#DIV/0!	7.58799	11.495
Asia	India	Indus River	Zhu et al., 2020, Earth and Planetary Science Letters, 536, p.116140.	CALLEN\010827\IND	CALLEN\010827\IND-118	24.2079	67.7327							969.372				1137.18								0.103869	5.41069		5.16716	0.344967	246.816			346.444					98.8163					738.249	0	738.249	#DIV/0!	36.7188	4.39791
Europe	Germany	Elbe River	Zhu et al., 2020, Earth and Planetary Science Letters, 536, p.116140.	ziyi zhu\180430\Elbe	ziyi zhu\180430\Elbe-016	53.831	8.82492							970.8				238.9					676.9			0.0175	32.98		2.29		1.091			70.3					30.65					38.3	0	38.3	#DIV/0!	7.71392	8.48052
Europe	Germany	Elbe River	Zhu et al., 2020, Earth and Planetary Science Letters, 536, p.116140.	ziyi zhu\180501\Elbe	ziyi zhu\180501\Elbe-170	53.831	8.82492							970.8				208.5					1045			0.0159	21.42		1.37		0.195			96.2					57.8					380	0	380	#DIV/0!	6.73232	12.8409
Europe	Poland	Vistula River	Zhu et al., 2020, Earth and Planetary Science Letters, 536, p.116140.	ziyi zhu\180501\Vis1	ziyi zhu\180501\Vis1-017	54.3587	18.9465							970.8				223.3					472.2			0.47	6.68		1.05		0.13			42.64					26.22					88.8	0	88.8	#DIV/0!	7.2102	5.78302
Europe	Poland	Vistula River	Zhu et al., 2020, Earth and Planetary Science Letters, 536, p.116140.	ziyi zhu\180501\Vis2	ziyi zhu\180501\Vis2-099	54.3587	18.9465							970.8				222.2					528.8			0.0071	7.59		1.09		0.148			50.46					27.03					77.08	0	77.08	#DIV/0!	7.17469	6.476
Europe	France	Rhone River	Zhu et al., 2020, Earth and Planetary Science Letters, 536, p.116140.	wang yan\061213\e12	wang yan\061213\e12-182	53.9222	8.72222							971.798				76.6157					198.698			0.0564361	12.9368				0.228446			14.0411					21.8756					204.84	0	204.84	#DIV/0!	2.47387	2.54073
Europe	Poland	Oder River	Zhu et al., 2020, Earth and Planetary Science Letters, 536, p.116140.	CALLEN\060223\E3	CALLEN\060223\E3-017	53.9222	8.72222							973.215				176.863					372.064				28.6594			1.89705	0.499186			34.6247					22.9495					49.8753	0	49.8753	#DIV/0!	5.7108	4.74988
Asia	India	Ganges River	Zhu et al., 2020, Earth and Planetary Science Letters, 536, p.116140.	CALLEN\011025\GR8	CALLEN\011025\GR8-060	23.8544	89.4217							973.919				830.802									0.85208		1.22537	4.37019	0.344232			188.33					72.3862					146.562	0	146.562	#DIV/0!	26.826	1.61849
Asia	India	Ganges River	Zhu et al., 2020, Earth and Planetary Science Letters, 536, p.116140.	CALLEN\011025\GR9	CALLEN\011025\GR9-066	23.8544	89.4217							974.052				267.292									11.5245		1.36191	2.53015	0.478634			78.9461					70.542					439.882	0	439.882	#DIV/0!	8.63069	1.00059
Europe	Poland	Vistula River	Zhu et al., 2020, Earth and Planetary Science Letters, 536, p.116140.	ziyi zhu\180501\Vis1	ziyi zhu\180501\Vis1-089	54.3587	18.9465							976.5				215					1040			0.036	62.4		3.13		1.09			96.6					63.1					114.1	0	114.1	#DIV/0!	6.9422	13.1281
Europe	France	Rhone River	Zhu et al., 2020, Earth and Planetary Science Letters, 536, p.116140.	wang yan\061213\e12	wang yan\061213\e12-178	53.9222	8.72222							978.383				462.816					3155.64				37.5229			13.0435	1.07102			279.848					141.015					609.892	0	609.892	#DIV/0!	14.944	38.3861
Asia	India	Ganges	Zhu et al., 2020, Earth and Planetary Science Letters, 536, p.116140.	callen\030820\gr8	callen\030820\gr8-36	23.8544	89.4217							978.875				267.705									14.4432		1.20855	2.92549	0.213649			70.0715					37.9151					357.135	0	357.135	#DIV/0!	8.644	0.780197
Europe	Poland	Vistula River	Zhu et al., 2020, Earth and Planetary Science Letters, 536, p.116140.	ziyi zhu\180501\Vis2	ziyi zhu\180501\Vis2-082	54.3587	18.9465							979.4				367.8					704			0.033	13.05		2.58		1.695			72					35.69					22.9	0	22.9	#DIV/0!	11.876	8.68846
Europe	Germany	Fehrman Island	Zhu et al., 2020, Earth and Planetary Science Letters, 536, p.116140.	callen\051012\e5	callen\051012\e5-001	53.9222	8.72222							980.267				105.38					333.368				17.1082			2.0847	0.978641			31.7557					14.876					247.988	0	247.988	#DIV/0!	3.40266	4.17276
Europe	Germany	Rhine River	Zhu et al., 2020, Earth and Planetary Science Letters, 536, p.116140.	callen\060609\e10	callen\060609\E10-183	53.9222	8.72222							986.662				452.095					1803.44			0.164648	24.0982			4.30684	0.468177			132.751					89.8045					135.623	0	135.623	#DIV/0!	14.5978	21.8212
Europe	Germany	Fehrman Island	Zhu et al., 2020, Earth and Planetary Science Letters, 536, p.116140.	callen\051012\e5	callen\051012\e5-027	53.9222	8.72222							986.854				65.9486					201.471				1.44508			0.45902				14.3692					21.583					180.557	0	180.557	#DIV/0!	2.12944	2.49139
Europe	France	Rhone River	Zhu et al., 2020, Earth and Planetary Science Letters, 536, p.116140.	wang yan\061213\e12	wang yan\061213\e12-191	53.9222	8.72222							989.354				229.083					575.486				39.1808			3.4289	0.706915			55.8446					34.5694					105.788	0	105.788	#DIV/0!	7.39693	7.32172
Europe	Hungary	Danube River	Zhu et al., 2020, Earth and Planetary Science Letters, 536, p.116140.	callen\060215\e2	callen\060215\e2-141	53.9222	8.72222							989.533				465.991					1533.19				40.4066			4.45308	1.45084			127.003					95.4714					233.093	0	233.093	#DIV/0!	15.0465	18.9009
Europe	Germany	Elbe River	Zhu et al., 2020, Earth and Planetary Science Letters, 536, p.116140.	ziyi zhu\180430\Elbe	ziyi zhu\180430\Elbe-030	53.831	8.82492							990.7				181.7					1331			0.0172	9.98		5.33		0.401			139.6					52.7					242	0	242	#DIV/0!	5.86697	16.2431
Europe	Germany	Fehrman Island	Zhu et al., 2020, Earth and Planetary Science Letters, 536, p.116140.	callen\051012\e5	callen\051012\e5-119	53.9222	8.72222							992.839				179.771					316.966			0.311618	12.8661			1.56859	0.209663			26.9666					20.1248					325.097	0	325.097	#DIV/0!	5.80469	3.95226
Europe	Germany	Elbe River	Zhu et al., 2020, Earth and Planetary Science Letters, 536, p.116140.	ziyi zhu\180501\Elbe	ziyi zhu\180501\Elbe-180	53.831	8.82492							993.5				265.9					989			0.0201	36.8		3.96		1.99			99.3					50.3					145	0	145	#DIV/0!	8.58573	12.3267
Europe	Germany	Elbe River	Zhu et al., 2020, Earth and Planetary Science Letters, 536, p.116140.	ziyi zhu\180430\Elbe	ziyi zhu\180430\Elbe-143	53.831	8.82492							996.3				105.2					336.8			0.116	22.67		0.61		0.21			19.41					48.29					412	0	412	#DIV/0!	3.39684	4.35218
Europe	Poland	Vistula River	Zhu et al., 2020, Earth and Planetary Science Letters, 536, p.116140.	ziyi zhu\180501\Vis1	ziyi zhu\180501\Vis1-045	54.3587	18.9465							996.3				311.7					839			0.0114	19.06		1.86		0.388			79.7					45.01					115.6	0	115.6	#DIV/0!	10.0646	10.3368
Europe	Germany	Fehrman Island	Zhu et al., 2020, Earth and Planetary Science Letters, 536, p.116140.	callen\051012\e5	callen\051012\e5-015	53.9222	8.72222							997.113				287.796					764.572				8.08732			2.60331	0.293493			70.0991					33.7183					76.0549	0	76.0549	#DIV/0!	9.29273	9.30138
Europe	France	Rhone River	Zhu et al., 2020, Earth and Planetary Science Letters, 536, p.116140.	wang yan\061213\e12	wang yan\061213\e12-084	53.9222	8.72222							997.218				269.929					861.457				15.3748			3.21406	0.24072			80.5981					47.9267					289.65	0	289.65	#DIV/0!	8.71583	10.5927
Europe	Poland	Vistula River	Zhu et al., 2020, Earth and Planetary Science Letters, 536, p.116140.	ziyi zhu\180501\Vis1	ziyi zhu\180501\Vis1-052	54.3587	18.9465							999.1				167.6					510			0.083	17.12		0.95		0.228			46.8					28.8					156.3	0	156.3	#DIV/0!	5.41169	6.32024
Europe	Poland	Vistula River	Zhu et al., 2020, Earth and Planetary Science Letters, 536, p.116140.	ziyi zhu\180501\Vis2	ziyi zhu\180501\Vis2-045	54.3587	18.9465							999.1				76.6					204			0.0095	3.33		0.41		0.405			25.9					7.44					317	0	317	#DIV/0!	2.47336	2.52596
Europe	Italy	Po River	Zhu et al., 2020, Earth and Planetary Science Letters, 536, p.116140.	callen\041216\po	callen\041216\po-083	44.9525	12.4319							999.108				208.857					434.007				10.7925		1.50518	2.9343	0.27282			42.1578					20.0498					200.653	0	200.653	#DIV/0!	6.74384	5.36474
Europe	France	Rhone River	Zhu et al., 2020, Earth and Planetary Science Letters, 536, p.116140.	wang yan\061213\e12	wang yan\061213\e12-014	53.9222	8.72222							1000.89				242.265					1165.46				17.0706			3.18429	0.182628			98.9722					68.1735					182.299	0	182.299	#DIV/0!	7.82256	14.2526
Europe	Germany	Elbe River	Zhu et al., 2020, Earth and Planetary Science Letters, 536, p.116140.	ziyi zhu\180430\Elbe	ziyi zhu\180430\Elbe-001	53.831	8.82492							1001.9				251.1					587			0.0069	32.36		1.42		0.617			52.7					38.7					72.8	0	72.8	#DIV/0!	8.10785	7.39331
Europe	Germany	Rhine River	Zhu et al., 2020, Earth and Planetary Science Letters, 536, p.116140.	callen\060609\e10	callen\060609\E10-146	53.9222	8.72222							1003.03				317.6					1657.23			0.0437785	6.48264			5.79372	0.246849			123.416					54.4633					119.08	0	119.08	#DIV/0!	10.2551	19.7989
Europe	Poland	Oder River	Zhu et al., 2020, Earth and Planetary Science Letters, 536, p.116140.	CALLEN\060223\E3	CALLEN\060223\E3-146	53.9222	8.72222							1003.85				238.266					662.922				62.677			3.41427	0.733718			63.5661					37.8141					120.487	0	120.487	#DIV/0!	7.69344	8.53909
Europe	Poland	Vistula River	Zhu et al., 2020, Earth and Planetary Science Letters, 536, p.116140.	ziyi zhu\180501\Vis1	ziyi zhu\180501\Vis1-040	54.3587	18.9465							1004.7				310					781			0.056	18.98		2.08		0.429			70.4					48					67.2	0	67.2	#DIV/0!	10.0097	9.64579
Asia	India	Ganges River	Zhu et al., 2020, Earth and Planetary Science Letters, 536, p.116140.	CALLEN\011025\GR9	CALLEN\011025\GR9-014	23.8544	89.4217							1004.84				417.555									7.97033		2.49808	5.9544	0.472179			126.996					45.2173					100.515	0	100.515	#DIV/0!	13.4826	1.15681
Europe	Poland	Oder River	Zhu et al., 2020, Earth and Planetary Science Letters, 536, p.116140.	CALLEN\060223\E3	CALLEN\060223\E3-037	53.9222	8.72222							1006.23				186.383					549.117			0.099708	5.31219			2.66471	0.58642			51.4861					30.1036					16.9182	0	16.9182	#DIV/0!	6.01817	6.72586
Europe	Poland	Oder River	Zhu et al., 2020, Earth and Planetary Science Letters, 536, p.116140.	CALLEN\060223\E3	CALLEN\060223\E3-150	53.9222	8.72222							1006.27				253.681					449.028				18.6402			1.56759	0.421118			42.0594					30.5523					73.2563	0	73.2563	#DIV/0!	8.19117	5.63059
Asia	India	Ganges River	Zhu et al., 2020, Earth and Planetary Science Letters, 536, p.116140.	CALLEN\011025\GR8	CALLEN\011025\GR8-023	23.8544	89.4217							1007.48				289.144									10.0057		2.36155	4.72017	0.251087			82.6738					37.9964					237.089	0	237.089	#DIV/0!	9.33627	0.846715
Asia	India	Ganges River	Zhu et al., 2020, Earth and Planetary Science Letters, 536, p.116140.	CALLEN\011025\GR8	CALLEN\011025\GR8-054	23.8544	89.4217							1008.41				517.289									4.95649		2.72597	6.33179	0.454171			114.33					50.858					158.602	0	158.602	#DIV/0!	16.7029	1.09355
Asia	India	Ganges River	Zhu et al., 2020, Earth and Planetary Science Letters, 536, p.116140.	CALLEN\011025\GR8	CALLEN\011025\GR8-046	23.8544	89.4217							1008.89				902.415									3.26469		1.52802	4.77836	0.300714			169.053					96.7506					342.872	0	342.872	#DIV/0!	29.1383	1.66083
Europe	Germany	Fehrman Island	Zhu et al., 2020, Earth and Planetary Science Letters, 536, p.116140.	callen\051012\e5	callen\051012\e5-056	53.9222	8.72222							1009.81				209.797					715.242				11.3571			4.19971	0.286372			75.0347					31.3177					106.644	0	106.644	#DIV/0!	6.7742	8.79705
Europe	Poland	Vistula River	Zhu et al., 2020, Earth and Planetary Science Letters, 536, p.116140.	ziyi zhu\180501\Vis1	ziyi zhu\180501\Vis1-099	54.3587	18.9465							1013				262.3					670			0.0064	12.66		1.43		0.799			61.7					39.3					60	0	60	#DIV/0!	8.46949	8.24641
Europe	Poland	Vistula River	Zhu et al., 2020, Earth and Planetary Science Letters, 536, p.116140.	ziyi zhu\180501\Vis2	ziyi zhu\180501\Vis2-078	54.3587	18.9465							1013				243.4					1507			0.138	12.83		13.24		0.902			175					54.7					117.5	0	117.5	#DIV/0!	7.85922	18.5314
Europe	Poland	Oder River	Zhu et al., 2020, Earth and Planetary Science Letters, 536, p.116140.	CALLEN\060223\E3	CALLEN\060223\E3-116	53.9222	8.72222							1015.37				231.798					668.137				9.8933			2.74738	0.175638			63.6096					34.5677					168.977	0	168.977	#DIV/0!	7.48459	8.19461
Europe	Poland	Oder River	Zhu et al., 2020, Earth and Planetary Science Letters, 536, p.116140.	CALLEN\060223\E3	CALLEN\060223\E3-091	53.9222	8.72222							1017.81				257.855					764.916				11.61			2.83308	0.170629			72.0484					38.8383					154.383	0	154.383	#DIV/0!	8.32596	9.37237
Europe	Poland	Oder River	Zhu et al., 2020, Earth and Planetary Science Letters, 536, p.116140.	CALLEN\060223\E3	CALLEN\060223\E3-063	53.9222	8.72222							1018.34				296.743					664.852				33.0107			4.11793	0.930428			65.396					35.0776					67.5311	0	67.5311	#DIV/0!	9.58164	8.35065
Europe	Germany	Rhine River	Zhu et al., 2020, Earth and Planetary Science Letters, 536, p.116140.	callen\060609\e10	callen\060609\E10-195	53.9222	8.72222							1020.03				223.596					1092.75			0.0333173	4.6369			6.02872	0.485074			111.374					47.2234					125.4	0	125.4	#DIV/0!	7.21976	13.3237
Europe	Germany	Elbe River	Zhu et al., 2020, Earth and Planetary Science Letters, 536, p.116140.	ziyi zhu\180430\Elbe	ziyi zhu\180430\Elbe-160	53.831	8.82492							1021.3				276.6					606			0.0079	33.61		1.45		0.744			55.3					38.27					64.8	0	64.8	#DIV/0!	8.93122	7.63055
Europe	Poland	Vistula River	Zhu et al., 2020, Earth and Planetary Science Letters, 536, p.116140.	ziyi zhu\180501\Vis2	ziyi zhu\180501\Vis2-056	54.3587	18.9465							1024.1				260.4					835			0.066	22.79		2.12		0.974			77.1					49.2					110.3	0	110.3	#DIV/0!	8.40814	10.3324
Europe	Poland	Vistula River	Zhu et al., 2020, Earth and Planetary Science Letters, 536, p.116140.	ziyi zhu\180501\Vis2	ziyi zhu\180501\Vis2-017	54.3587	18.9465							1026.9				95.3					304			0.065	0.321		0.4		0.096			9.56					274					173	0	173	#DIV/0!	3.07717	5.05028
Europe	France	Rhone River	Zhu et al., 2020, Earth and Planetary Science Letters, 536, p.116140.	wang yan\061213\e12	wang yan\061213\e12-148	53.9222	8.72222							1027.16				301.524					978.009				23.4176			3.44146	0.407694			92.8575					58.3156					239.368	0	239.368	#DIV/0!	9.73601	12.0986
Europe	Poland	Oder River	Zhu et al., 2020, Earth and Planetary Science Letters, 536, p.116140.	CALLEN\060223\E3	CALLEN\060223\E3-012	53.9222	8.72222							1027.33				214.532					422.742				3.19354			2.00797	0.2596			40.4797					21.4346					24.4736	0	24.4736	#DIV/0!	6.92708	5.1647
Europe	Poland	Oder River	Zhu et al., 2020, Earth and Planetary Science Letters, 536, p.116140.	CALLEN\060223\E3	CALLEN\060223\E3-081	53.9222	8.72222							1028.88				65.1537					90.4688				1.47058							4.83789					18.585					108.915	0	108.915	#DIV/0!	2.10377	1.16412
Europe	Poland	Vistula River	Zhu et al., 2020, Earth and Planetary Science Letters, 536, p.116140.	ziyi zhu\180501\Vis1	ziyi zhu\180501\Vis1-096	54.3587	18.9465							1029.6				243					515			0.172	6.82		1.02		0.142			46.2					30.9					153.4	0	153.4	#DIV/0!	7.8463	6.31183
Europe	France	Rhone River	Zhu et al., 2020, Earth and Planetary Science Letters, 536, p.116140.	wang yan\061213\e12	wang yan\061213\e12-149	53.9222	8.72222							1030.07				264.782					1291.52				5.06413			6.45065	0.370736			132.59					54.8491					94.941	0	94.941	#DIV/0!	8.54964	15.7386
Europe	Poland	Vistula River	Zhu et al., 2020, Earth and Planetary Science Letters, 536, p.116140.	ziyi zhu\180501\Vis2	ziyi zhu\180501\Vis2-002	54.3587	18.9465							1035.1				233.8					420.5			0.0108	19.61		1.49		0.894			41.9					23.7					51.2	0	51.2	#DIV/0!	7.54924	5.27957
Europe	Poland	Oder River	Zhu et al., 2020, Earth and Planetary Science Letters, 536, p.116140.	CALLEN\060223\E3	CALLEN\060223\E3-156	53.9222	8.72222							1036.6				267.987					727.885				7.53842			2.49247	0.229934			67.859					40.5486					169.091	0	169.091	#DIV/0!	8.65313	8.90887
Europe	Germany	Rhine River	Zhu et al., 2020, Earth and Planetary Science Letters, 536, p.116140.	callen\060609\e10	callen\060609\e10-041	53.9222	8.72222							1037.59				314.748					1115.74			0.0339932	13.4144			3.80726	0.160242			90.0855					50.6069					430.429	0	430.429	#DIV/0!	10.163	13.5164
Europe	Poland	Oder River	Zhu et al., 2020, Earth and Planetary Science Letters, 536, p.116140.	CALLEN\060223\E3	CALLEN\060223\E3-164	53.9222	8.72222							1039.75				284.175					562.908				23.2841			2.94271	0.89154			54.1284					31.9905					92.8776	0	92.8776	#DIV/0!	9.1758	7.03945
Europe	Germany	Elbe River	Zhu et al., 2020, Earth and Planetary Science Letters, 536, p.116140.	ziyi zhu\180430\Elbe	ziyi zhu\180430\Elbe-024	53.831	8.82492							1040.6				366					959			0.0106	27.53		2.44		1.52			90.6					50.9					32.11	0	32.11	#DIV/0!	11.8179	11.8593
Europe	Germany	Elbe River	Zhu et al., 2020, Earth and Planetary Science Letters, 536, p.116140.	ziyi zhu\180430\Elbe	ziyi zhu\180430\Elbe-063	53.831	8.82492							1040.6				221.6					684			0.0063	16.24		1.21		0.317			64.7					35.5					132.5	0	132.5	#DIV/0!	7.15531	8.42149
Europe	Poland	Oder River	Zhu et al., 2020, Earth and Planetary Science Letters, 536, p.116140.	CALLEN\060223\E3	CALLEN\060223\E3-009	53.9222	8.72222							1041.22				291.617					786.902			0.0898493	9.13276			4.08096	0.712939			77.8523					39.9563					94.7147	0	94.7147	#DIV/0!	9.41611	9.65662
Europe	Poland	Oder River	Zhu et al., 2020, Earth and Planetary Science Letters, 536, p.116140.	CALLEN\060223\E3	CALLEN\060223\E3-128	53.9222	8.72222							1041.99				222.131					514.501				10.3996			1.78284	0.187997			47.5182					31.0589					166.289	0	166.289	#DIV/0!	7.17245	6.34464
Europe	Hungary	Danube River	Zhu et al., 2020, Earth and Planetary Science Letters, 536, p.116140.	wang yan\070110\e2	wang yan\070110\E2-17	53.9222	8.72222							1042.59				283.125					1417.04			0.0486079	59.9639			7.50974	1.07826			133.249					74.6665					186.953	0	186.953	#DIV/0!	9.1419	17.6717
Europe	Germany	Rhine River	Zhu et al., 2020, Earth and Planetary Science Letters, 536, p.116140.	callen\060609\e10	callen\060609\E10-122	53.9222	8.72222							1043.07				576.444					1029.39				16.5889			3.15122	0.778463			89.8716					66.3579					81.0513	0	81.0513	#DIV/0!	18.613	12.6559
Europe	Poland	Vistula River	Zhu et al., 2020, Earth and Planetary Science Letters, 536, p.116140.	ziyi zhu\180501\Vis2	ziyi zhu\180501\Vis2-003	54.3587	18.9465							1043.3				336					1461			0.069	13		2.86		0.87			134.9					76.6					263	0	263	#DIV/0!	10.8492	17.8209
Europe	Hungary	Danube River	Zhu et al., 2020, Earth and Planetary Science Letters, 536, p.116140.	wang yan\070110\e2	wang yan\070110\E2-24	53.9222	8.72222							1044.26				318.06					1575.03				14.3528			10.0849	0.208189			164.459					69.9071					177.398	0	177.398	#DIV/0!	10.27	19.2992
Europe	Germany	Rhine River	Zhu et al., 2020, Earth and Planetary Science Letters, 536, p.116140.	callen\060609\e10	callen\060609\E10-185	53.9222	8.72222							1047.57				274.484					622.931			0.036756	15.0035			2.89747	0.484393			62.6819					31.8793					101.923	0	101.923	#DIV/0!	8.86289	7.7048
Europe	Germany	Elbe River	Zhu et al., 2020, Earth and Planetary Science Letters, 536, p.116140.	ziyi zhu\180430\Elbe	ziyi zhu\180430\Elbe-054	53.831	8.82492							1048.7				358.4					1432			0.0463	43.7		2.74		0.914			129.9					80.6					146.6	0	146.6	#DIV/0!	11.5725	17.7052
Europe	Germany	Fehrman Island	Zhu et al., 2020, Earth and Planetary Science Letters, 536, p.116140.	callen\051012\e5	callen\051012\e5-039	53.9222	8.72222							1051.37				209.926					445.438				9.6083			1.98464	0.414092			41.8695					29.6314					26.4811	0	26.4811	#DIV/0!	6.77835	5.52203
Europe	Germany	Elbe River	Zhu et al., 2020, Earth and Planetary Science Letters, 536, p.116140.	ziyi zhu\180430\Elbe	ziyi zhu\180430\Elbe-047	53.831	8.82492							1051.4				362					1357			0.057	55.6		8.05		2.81			148.4					62.3					37.9	0	37.9	#DIV/0!	11.6887	17.0052
Europe	Germany	Fehrman Island	Zhu et al., 2020, Earth and Planetary Science Letters, 536, p.116140.	callen\051012\e5	callen\051012\e5-035	53.9222	8.72222							1053.12				202.877					1010.83				5.65176			5.31785	0.551494			99.7284					43.3976					109.279	0	109.279	#DIV/0!	6.55075	12.3115
Asia	India	Indus River	Zhu et al., 2020, Earth and Planetary Science Letters, 536, p.116140.	CALLEN\010827\IND	CALLEN\010827\IND-097	24.2079	67.7327							1055.5				90.6561									5.96686			0.253435	26.6069			44.919					17.7961					68.2082	0	68.2082	#DIV/0!	2.92722	0.597437
Europe	Poland	Vistula River	Zhu et al., 2020, Earth and Planetary Science Letters, 536, p.116140.	ziyi zhu\180501\Vis2	ziyi zhu\180501\Vis2-065	54.3587	18.9465							1064.9				153.9					439.3			0.0171	2.53		0.645		0.123			40.97					26.55					42.5	0	42.5	#DIV/0!	4.96933	5.36881
Europe	Poland	Oder River	Zhu et al., 2020, Earth and Planetary Science Letters, 536, p.116140.	CALLEN\060223\E3	CALLEN\060223\E3-104	53.9222	8.72222							1066.85				235.152					488.083				8.71511			2.09876	0.28185			48.3124					25.5928					62.9312	0	62.9312	#DIV/0!	7.59288	6.01182
Europe	Germany	Elbe River	Zhu et al., 2020, Earth and Planetary Science Letters, 536, p.116140.	ziyi zhu\180430\Elbe	ziyi zhu\180430\Elbe-012	53.831	8.82492							1067.6				207.8					462			0.0023	21.65		0.565		0.258			39.8					31.24					172.7	0	172.7	#DIV/0!	6.70972	5.78045
Europe	Poland	Vistula River	Zhu et al., 2020, Earth and Planetary Science Letters, 536, p.116140.	ziyi zhu\180501\Vis2	ziyi zhu\180501\Vis2-051	54.3587	18.9465							1067.6				289.9					473.3				15.02		1.39		0.913			46.4					26.07					21.5	0	21.5	#DIV/0!	9.36067	5.88132
Europe	Poland	Oder River	Zhu et al., 2020, Earth and Planetary Science Letters, 536, p.116140.	CALLEN\060223\E3	CALLEN\060223\E3-005	53.9222	8.72222							1068.58				228.007					620.908				8.21646			2.31162	0.22605			56.8313					33.4908					120.364	0	120.364	#DIV/0!	7.36219	7.60096
Europe	France	Rhone River	Zhu et al., 2020, Earth and Planetary Science Letters, 536, p.116140.	wang yan\061213\e12	wang yan\061213\e12-066	53.9222	8.72222							1072.03				709.919					1498.34				11.3481			4.38232	0.253559			135.943					78.9711					630.433	0	630.433	#DIV/0!	22.9228	18.2539
Europe	Poland	Vistula River	Zhu et al., 2020, Earth and Planetary Science Letters, 536, p.116140.	ziyi zhu\180501\Vis1	ziyi zhu\180501\Vis1-055	54.3587	18.9465							1072.9				200.1					528			0.0103	4.5		0.421		0.257			41.87					35.91					120.5	0	120.5	#DIV/0!	6.46109	6.43892
Europe	Poland	Vistula River	Zhu et al., 2020, Earth and Planetary Science Letters, 536, p.116140.	ziyi zhu\180501\Vis2	ziyi zhu\180501\Vis2-093	54.3587	18.9465							1072.9				378					1513			0.138	5.33		4.45		1.95			155.7					75.1					90.5	0	90.5	#DIV/0!	12.2054	18.4891
Europe	Poland	Vistula River	Zhu et al., 2020, Earth and Planetary Science Letters, 536, p.116140.	ziyi zhu\180501\Vis2	ziyi zhu\180501\Vis2-009	54.3587	18.9465							1075.6				274					632			0.139	28.98		4.05		1.48			65.5					32.7					50.1	0	50.1	#DIV/0!	8.84727	7.94472
Europe	Poland	Vistula River	Zhu et al., 2020, Earth and Planetary Science Letters, 536, p.116140.	ziyi zhu\180501\Vis2	ziyi zhu\180501\Vis2-085	54.3587	18.9465							1080.9				317.7					1031			0.053	7.63		4.8		0.97			105.6					53.88					84.9	0	84.9	#DIV/0!	10.2583	12.6495
Europe	Germany	Elbe River	Zhu et al., 2020, Earth and Planetary Science Letters, 536, p.116140.	ziyi zhu\180430\Elbe	ziyi zhu\180430\Elbe-146	53.831	8.82492							1083.6				566					1607			0.0094	6.87		1.75		0.113			144.5					88.2					263	0	263	#DIV/0!	18.2758	19.5317
Europe	Germany	Elbe River	Zhu et al., 2020, Earth and Planetary Science Letters, 536, p.116140.	ziyi zhu\180430\Elbe	ziyi zhu\180430\Elbe-156	53.831	8.82492							1083.6				364					1171			0.0306	7.44		3.01		1.13			111.4					59.3					94	0	94	#DIV/0!	11.7533	14.2781
Europe	Poland	Vistula River	Zhu et al., 2020, Earth and Planetary Science Letters, 536, p.116140.	ziyi zhu\180501\Vis1	ziyi zhu\180501\Vis1-005	54.3587	18.9465							1083.6				234.8					607			0.0135	16.39		1.06		0.595			54.8					37.4					113.6	0	113.6	#DIV/0!	7.58153	7.50719
Europe	Poland	Vistula River	Zhu et al., 2020, Earth and Planetary Science Letters, 536, p.116140.	ziyi zhu\180501\Vis1	ziyi zhu\180501\Vis1-082	54.3587	18.9465							1083.6				168.1					426.1			0.0179	6.96		0.39		0.08			33.2					31.67					395	0	395	#DIV/0!	5.42783	5.23134
Europe	Poland	Oder River	Zhu et al., 2020, Earth and Planetary Science Letters, 536, p.116140.	CALLEN\060223\E3	CALLEN\060223\E3-161	53.9222	8.72222							1085.39				126.032					643.102				10.3128			1.84385	0.0951925			56.4752					31.4413					294.673	0	294.673	#DIV/0!	4.06948	7.8477
Europe	Poland	Oder River	Zhu et al., 2020, Earth and Planetary Science Letters, 536, p.116140.	CALLEN\060223\E3	CALLEN\060223\E3-138	53.9222	8.72222							1086.06				343.761					1330.84			0.141417	48.5568			16.0665	2.56758			148.899					53.7921					42.8598	0	42.8598	#DIV/0!	11.0998	16.6651
Europe	Germany	Fehrman Island	Zhu et al., 2020, Earth and Planetary Science Letters, 536, p.116140.	callen\051012\e5	callen\051012\e5-071	53.9222	8.72222							1086.48				408.152					1513.76			0.0667032	9.39197			11.1107	0.873782			157.952					60.5868					125.111	0	125.111	#DIV/0!	13.1789	18.4931
Europe	Poland	Oder River	Zhu et al., 2020, Earth and Planetary Science Letters, 536, p.116140.	CALLEN\060223\E3	CALLEN\060223\E3-054	53.9222	8.72222							1091.28				658.312					2122.83			0.29599	31.3348			26.0423	10.5972			257.607					58.3941					28.6079	0	28.6079	#DIV/0!	21.2564	26.2665
Europe	Germany	Fehrman Island	Zhu et al., 2020, Earth and Planetary Science Letters, 536, p.116140.	callen\051012\e5	callen\051012\e5-016	53.9222	8.72222							1091.6				306.892					735.992				6.04649			2.49537	0.409307			65.8715					40.9928					92.8507	0	92.8507	#DIV/0!	9.90934	8.98093
Europe	Germany	Elbe River	Zhu et al., 2020, Earth and Planetary Science Letters, 536, p.116140.	ziyi zhu\180430\Elbe	ziyi zhu\180430\Elbe-059	53.831	8.82492							1094.2				333.9					1360			0.0132	47.3		7.29		2.58			155					49.6					49.5	0	49.5	#DIV/0!	10.7814	16.9406
Europe	Germany	Fehrman Island	Zhu et al., 2020, Earth and Planetary Science Letters, 536, p.116140.	callen\051012\e5	callen\051012\e5-086	53.9222	8.72222							1097.88				294.045					650.411				8.12854			2.37925	0.228603			60.4591					34.7215					149.178	0	149.178	#DIV/0!	9.49452	7.96201
Europe	Poland	Vistula River	Zhu et al., 2020, Earth and Planetary Science Letters, 536, p.116140.	ziyi zhu\180501\Vis2	ziyi zhu\180501\Vis2-008	54.3587	18.9465							1099.4				207.9					814			0.0086	9.01		1.28		0.143			72.9					48.6					84.1	0	84.1	#DIV/0!	6.71295	9.95688
Europe	Germany	Fehrman Island	Zhu et al., 2020, Earth and Planetary Science Letters, 536, p.116140.	callen\051012\e5	callen\051012\e5-031	53.9222	8.72222							1101.98				205.623					538.329				7.14511			1.44085	0.149096			46.3234					31.5084					204.157	0	204.157	#DIV/0!	6.63942	6.58212
Europe	Germany	Elbe River	Zhu et al., 2020, Earth and Planetary Science Letters, 536, p.116140.	ziyi zhu\180430\Elbe	ziyi zhu\180430\Elbe-139	53.831	8.82492							1102.1				346					1204			0.0216	4.6		4.22		1.48			120.6					57.9					58.6	0	58.6	#DIV/0!	11.1721	14.6883
Europe	Germany	Rhine River	Zhu et al., 2020, Earth and Planetary Science Letters, 536, p.116140.	callen\060609\e10	callen\060609\e10-033	53.9222	8.72222							1103.79				296.132					843.3				4.4972			2.41353	0.154685			71.0364					43.8895					65.4565	0	65.4565	#DIV/0!	9.5619	10.2231
Asia	India	Ganges River	Zhu et al., 2020, Earth and Planetary Science Letters, 536, p.116140.	CALLEN\011025\GR8	CALLEN\011025\GR8-027	23.8544	89.4217							1104.91				129.669									9.06236		3.45584	8.81905	0.415085			157.325					67.7181					244.022	0	244.022	#DIV/0!	4.18694	1.50513
Asia	India	Ganges River	Zhu et al., 2020, Earth and Planetary Science Letters, 536, p.116140.	CALLEN\011025\GR8	CALLEN\011025\GR8-034	23.8544	89.4217							1113.18				755.655									2.14093		1.72658	5.05648	0.486952			119.937					68.2164					242.165	0	242.165	#DIV/0!	24.3996	1.19196
Europe	Germany	Elbe River	Zhu et al., 2020, Earth and Planetary Science Letters, 536, p.116140.	ziyi zhu\180430\Elbe	ziyi zhu\180430\Elbe-153	53.831	8.82492							1117.7				121.7					345.2			0.027	2.72		0.87		0.426			34.4					16.01					67	0	67	#DIV/0!	3.92961	4.21464
Europe	Germany	Elbe River	Zhu et al., 2020, Earth and Planetary Science Letters, 536, p.116140.	ziyi zhu\180430\Elbe	ziyi zhu\180430\Elbe-158	53.831	8.82492							1120.3				171.9					544.1			0.043	8.43		0.99		0.207			43.1					37.18					259	0	259	#DIV/0!	5.55053	6.66676
Europe	Germany	Elbe River	Zhu et al., 2020, Earth and Planetary Science Letters, 536, p.116140.	ziyi zhu\180501\Elbe	ziyi zhu\180501\Elbe-174	53.831	8.82492							1120.3				241.2					580			0.0317	7.84		0.8		0.115			50.6					33.6					175.6	0	175.6	#DIV/0!	7.78818	7.09006
Europe	Poland	Oder River	Zhu et al., 2020, Earth and Planetary Science Letters, 536, p.116140.	CALLEN\060223\E3	CALLEN\060223\E3-049	53.9222	8.72222							1121.19				1727.35					3162.14			0.0866384	8.20762			8.75597	0.511519			283.077					155.365					309.715	0	309.715	#DIV/0!	55.7748	38.3202
Europe	Poland	Oder River	Zhu et al., 2020, Earth and Planetary Science Letters, 536, p.116140.	CALLEN\060223\E3	CALLEN\060223\E3-133	53.9222	8.72222							1123.75				252.993					766.43				11.2349			2.14445	0.127044			68.6422					44.0626					395.031	0	395.031	#DIV/0!	8.16896	9.39075
Europe	Germany	Elbe River	Zhu et al., 2020, Earth and Planetary Science Letters, 536, p.116140.	ziyi zhu\180430\Elbe	ziyi zhu\180430\Elbe-009	53.831	8.82492							1125.5				135.5					356			0.0245	2.01		1.23		0.55			37.4					15.69					59.7	0	59.7	#DIV/0!	4.3752	4.35098
Europe	Germany	Fehrman Island	Zhu et al., 2020, Earth and Planetary Science Letters, 536, p.116140.	callen\051012\e5	callen\051012\e5-088	53.9222	8.72222							1130.07				274.109					620.783				7.12605			2.31887	0.233085			57.9691					33.5049					146.496	0	146.496	#DIV/0!	8.85079	7.59894
Europe	Germany	Fehrman Island	Zhu et al., 2020, Earth and Planetary Science Letters, 536, p.116140.	callen\051012\e5	callen\051012\e5-060	53.9222	8.72222							1131.39				78.4317					740.274				3.3001			5.10509	0.149191			78.8002					38.1318					23.4096	0	23.4096	#DIV/0!	2.5325	9.08834
Europe	Germany	Fehrman Island	Zhu et al., 2020, Earth and Planetary Science Letters, 536, p.116140.	callen\051012\e5	callen\051012\e5-110	53.9222	8.72222							1132.65				255.891					548.609				8.66158			1.88761	0.215392			48.0814					34.8741					93.2913	0	93.2913	#DIV/0!	8.26255	6.74204
Europe	Germany	Rhine River	Zhu et al., 2020, Earth and Planetary Science Letters, 536, p.116140.	callen\060609\e10	callen\060609\E10-182	53.9222	8.72222							1132.96				588.055					750.076			0.954719	15.8554			3.72081	0.319508			65.0893					37.5986					113.96	0	113.96	#DIV/0!	18.9879	9.19959
Europe	Germany	Elbe River	Zhu et al., 2020, Earth and Planetary Science Letters, 536, p.116140.	ziyi zhu\180430\Elbe	ziyi zhu\180430\Elbe-067	53.831	8.82492							1133.2				325					1432			0.038	4.63		4.72		1.65			147.6					65.6					64.4	0	64.4	#DIV/0!	10.494	17.4681
Europe	Portugal	Tagus River	Zhu et al., 2020, Earth and Planetary Science Letters, 536, p.116140.	ziyi zhu\180928\Tag2	ziyi zhu\180929\Tag2-096	38.9227	-8.99893							1133.2				189					827			0.102	10.64		2.83	4.25	1.58			67.5					69.7					77.4	0	77.4	#DIV/0!	6.10268	10.2512
Europe	Portugal	Tagus River	Zhu et al., 2020, Earth and Planetary Science Letters, 536, p.116140.	ziyi zhu\180928\Tag2	ziyi zhu\180929\Tag2-113	38.9227	-8.99893							1135.8				523					1198			0.052	8.6		1.49	3.45	0.326			107					61.63					342.4	0	342.4	#DIV/0!	16.8873	14.5836
Europe	Germany	Fehrman Island	Zhu et al., 2020, Earth and Planetary Science Letters, 536, p.116140.	callen\051012\e5	callen\051012\e5-034	53.9222	8.72222							1135.82				210.105					474.888				16.1761			1.48995	0.296381			37.9929					33.7303					190.764	0	190.764	#DIV/0!	6.78414	5.89569
Europe	Germany	Elbe River	Zhu et al., 2020, Earth and Planetary Science Letters, 536, p.116140.	ziyi zhu\180430\Elbe	ziyi zhu\180430\Elbe-035	53.831	8.82492							1138.3				322.4					1030			0.0054	5.25		2.06		0.864			96					53.8					68.4	0	68.4	#DIV/0!	10.4101	12.5417
Europe	Germany	Elbe River	Zhu et al., 2020, Earth and Planetary Science Letters, 536, p.116140.	ziyi zhu\180430\Elbe	ziyi zhu\180430\Elbe-137	53.831	8.82492							1138.3				230.5					391			0.0276	5.15		1.15		0.535			34.7					28.17					43.1	0	43.1	#DIV/0!	7.44269	4.82116
Europe	Germany	Elbe River	Zhu et al., 2020, Earth and Planetary Science Letters, 536, p.116140.	ziyi zhu\180501\Elbe	ziyi zhu\180501\Elbe-165	53.831	8.82492							1138.3				305.7					921			0.154	14.06		2.05		0.452			83.1					49.7					193.6	0	193.6	#DIV/0!	9.87084	11.274
Europe	Germany	Elbe River	Zhu et al., 2020, Earth and Planetary Science Letters, 536, p.116140.	ziyi zhu\180430\Elbe	ziyi zhu\180430\Elbe-073	53.831	8.82492							1140.9				325.6					917			0.0227	8.25		1.2		0.278			84.4					48.9					213.9	0	213.9	#DIV/0!	10.5134	11.183
Europe	Poland	Vistula River	Zhu et al., 2020, Earth and Planetary Science Letters, 536, p.116140.	ziyi zhu\180501\Vis2	ziyi zhu\180501\Vis2-004	54.3587	18.9465							1140.9				195.6					291			0.0382	12.23		0.88		0.234			24.39					22.15					61.5	0	61.5	#DIV/0!	6.31579	3.64522
Asia	India	Ganges	Zhu et al., 2020, Earth and Planetary Science Letters, 536, p.116140.	callen\030820\gr8	callen\030820\gr8-16	23.8544	89.4217							1141.41				984.507								0.206148	23.3438		8.67075	22.5254	13.7042			356.079					75.9758					768.252	0	768.252	#DIV/0!	31.7891	3.09357
Europe	Poland	Oder River	Zhu et al., 2020, Earth and Planetary Science Letters, 536, p.116140.	CALLEN\060223\E3	CALLEN\060223\E3-075	53.9222	8.72222							1142.74				224.024					508.709				7.47798			1.46357	0.124103			45.7291					28.6663					195.572	0	195.572	#DIV/0!	7.23359	6.2314
Europe	Poland	Oder River	Zhu et al., 2020, Earth and Planetary Science Letters, 536, p.116140.	CALLEN\060223\E3	CALLEN\060223\E3-048	53.9222	8.72222							1143.18				831.591					1912.45				6.02033			3.81228	0.223283			165.724					100.968					328.138	0	328.138	#DIV/0!	26.8515	23.1789
Europe	Germany	Elbe River	Zhu et al., 2020, Earth and Planetary Science Letters, 536, p.116140.	ziyi zhu\180430\Elbe	ziyi zhu\180430\Elbe-040	53.831	8.82492							1143.4				262.6					923			0.09	9.9		2		0.358			82.3					51.2					199	0	199	#DIV/0!	8.47917	11.269
Europe	Poland	Oder River	Zhu et al., 2020, Earth and Planetary Science Letters, 536, p.116140.	CALLEN\060223\E3	CALLEN\060223\E3-123	53.9222	8.72222							1144.38				280.053					710.199				7.74223			2.33235	0.186954			64.0252					39.5773					115.227	0	115.227	#DIV/0!	9.04273	8.68089
Europe	Germany	Fehrman Island	Zhu et al., 2020, Earth and Planetary Science Letters, 536, p.116140.	callen\051012\e5	callen\051012\e5-089	53.9222	8.72222							1150.46				404.144					1912.6			0.108569	13.6717			13.3856	0.966953			198.946					91.2355					111.298	0	111.298	#DIV/0!	13.0495	23.4535
Europe	Germany	Fehrman Island	Zhu et al., 2020, Earth and Planetary Science Letters, 536, p.116140.	callen\051012\e5	callen\051012\e5-021	53.9222	8.72222							1150.51				232.692					2377.43				17.7305			10.1761	0.525597			228.824					109.831					151.265	0	151.265	#DIV/0!	7.51346	28.9762
Europe	Germany	Rhine River	Zhu et al., 2020, Earth and Planetary Science Letters, 536, p.116140.	callen\060609\e10	callen\060609\e10-106	53.9222	8.72222							1150.77				261.641					1150.12				3.28586			7.9763	0.79779			114.788					48.8428					42.0671	0	42.0671	#DIV/0!	8.4482	14.0045
Europe	Germany	Elbe River	Zhu et al., 2020, Earth and Planetary Science Letters, 536, p.116140.	ziyi zhu\180430\Elbe	ziyi zhu\180430\Elbe-077	53.831	8.82492							1151.1				278.3					691			0.0134	14.18		0.92		0.079			57.1					44.8					231	0	231	#DIV/0!	8.98612	8.48837
Asia	India	Indus River	Zhu et al., 2020, Earth and Planetary Science Letters, 536, p.116140.	CALLEN\010827\IND	CALLEN\010827\IND-093	24.2079	67.7327							1151.2				365.142								0.0654133	40.6859		1.24126	0.395301	94.1637			161.505					60.9813					320.969	0	320.969	#DIV/0!	11.7902	2.26395
Europe	France	Rhone River	Zhu et al., 2020, Earth and Planetary Science Letters, 536, p.116140.	wang yan\061213\e12	wang yan\061213\e12-052	53.9222	8.72222							1153.64				43.1128					145.15				1.43436							8.4385					20.5418					200.333	0	200.333	#DIV/0!	1.39208	1.81228
Europe	Poland	Oder River	Zhu et al., 2020, Earth and Planetary Science Letters, 536, p.116140.	CALLEN\060223\E3	CALLEN\060223\E3-157	53.9222	8.72222							1157.95				374.29					1094.71				50.7459			3.31661	0.48698			90.9098					73.0169					293.16	0	293.16	#DIV/0!	12.0856	13.6781
Europe	Poland	Oder River	Zhu et al., 2020, Earth and Planetary Science Letters, 536, p.116140.	CALLEN\060223\E3	CALLEN\060223\E3-159	53.9222	8.72222							1158.86				228.706					521.836				4.81131			1.85476	0.226554			48.4327					30.0927					80.6171	0	80.6171	#DIV/0!	7.38475	6.38809
Asia	India	Ganges River	Zhu et al., 2020, Earth and Planetary Science Letters, 536, p.116140.	CALLEN\011025\GR9	CALLEN\011025\GR9-069	23.8544	89.4217							1159.86				248.684									14.9103		1.09087	3.35623	0.481461			113.752					75.2676					489.603	0	489.603	#DIV/0!	8.02984	1.26959
Europe	Poland	Oder River	Zhu et al., 2020, Earth and Planetary Science Letters, 536, p.116140.	CALLEN\060223\E3	CALLEN\060223\E3-043	53.9222	8.72222							1160.93				222.434					782.914				9.46075			3.49082	0.213599			75.2944					35.3664					189.912	0	189.912	#DIV/0!	7.18223	9.56427
Europe	Germany	Elbe River	Zhu et al., 2020, Earth and Planetary Science Letters, 536, p.116140.	ziyi zhu\180430\Elbe	ziyi zhu\180430\Elbe-026	53.831	8.82492							1161.2				200.6					378				4.35		1.13		0.619			36.62					21.36					21.14	0	21.14	#DIV/0!	6.47724	4.64234
Europe	Poland	Vistula River	Zhu et al., 2020, Earth and Planetary Science Letters, 536, p.116140.	ziyi zhu\180501\Vis1	ziyi zhu\180501\Vis1-019	54.3587	18.9465							1161.2				365					1855			0.036	12.21		3.81		0.799			189.9					86.4					167	0	167	#DIV/0!	11.7856	22.6476
[truncated: 12,705 more rows]
[truncated: 1 more columns]

## Sheet: Filtered Database
Supplementary Table 2 Zircon age and trace element data from the Tethys
[truncated: 3,011 more rows]
[truncated: 3 more columns]
